# Supplementary material for: Photochemical syntheses, transformations, and bioorthogonal chemistry oftrans-cycloheptene and silatrans-cycloheptene Ag(i) complexes
Source: Royal Society of Chemistry journal article supplement (doi:10.1039/c7sc04773h), 2018-01-01
Supplement: c7sc04773h1.pdf [file c7sc04773h1.pdf]

$^1\text{H}$  NMR (600 MHz,  $\text{CDCl}_3$ )

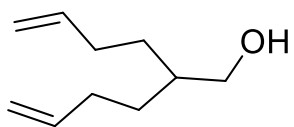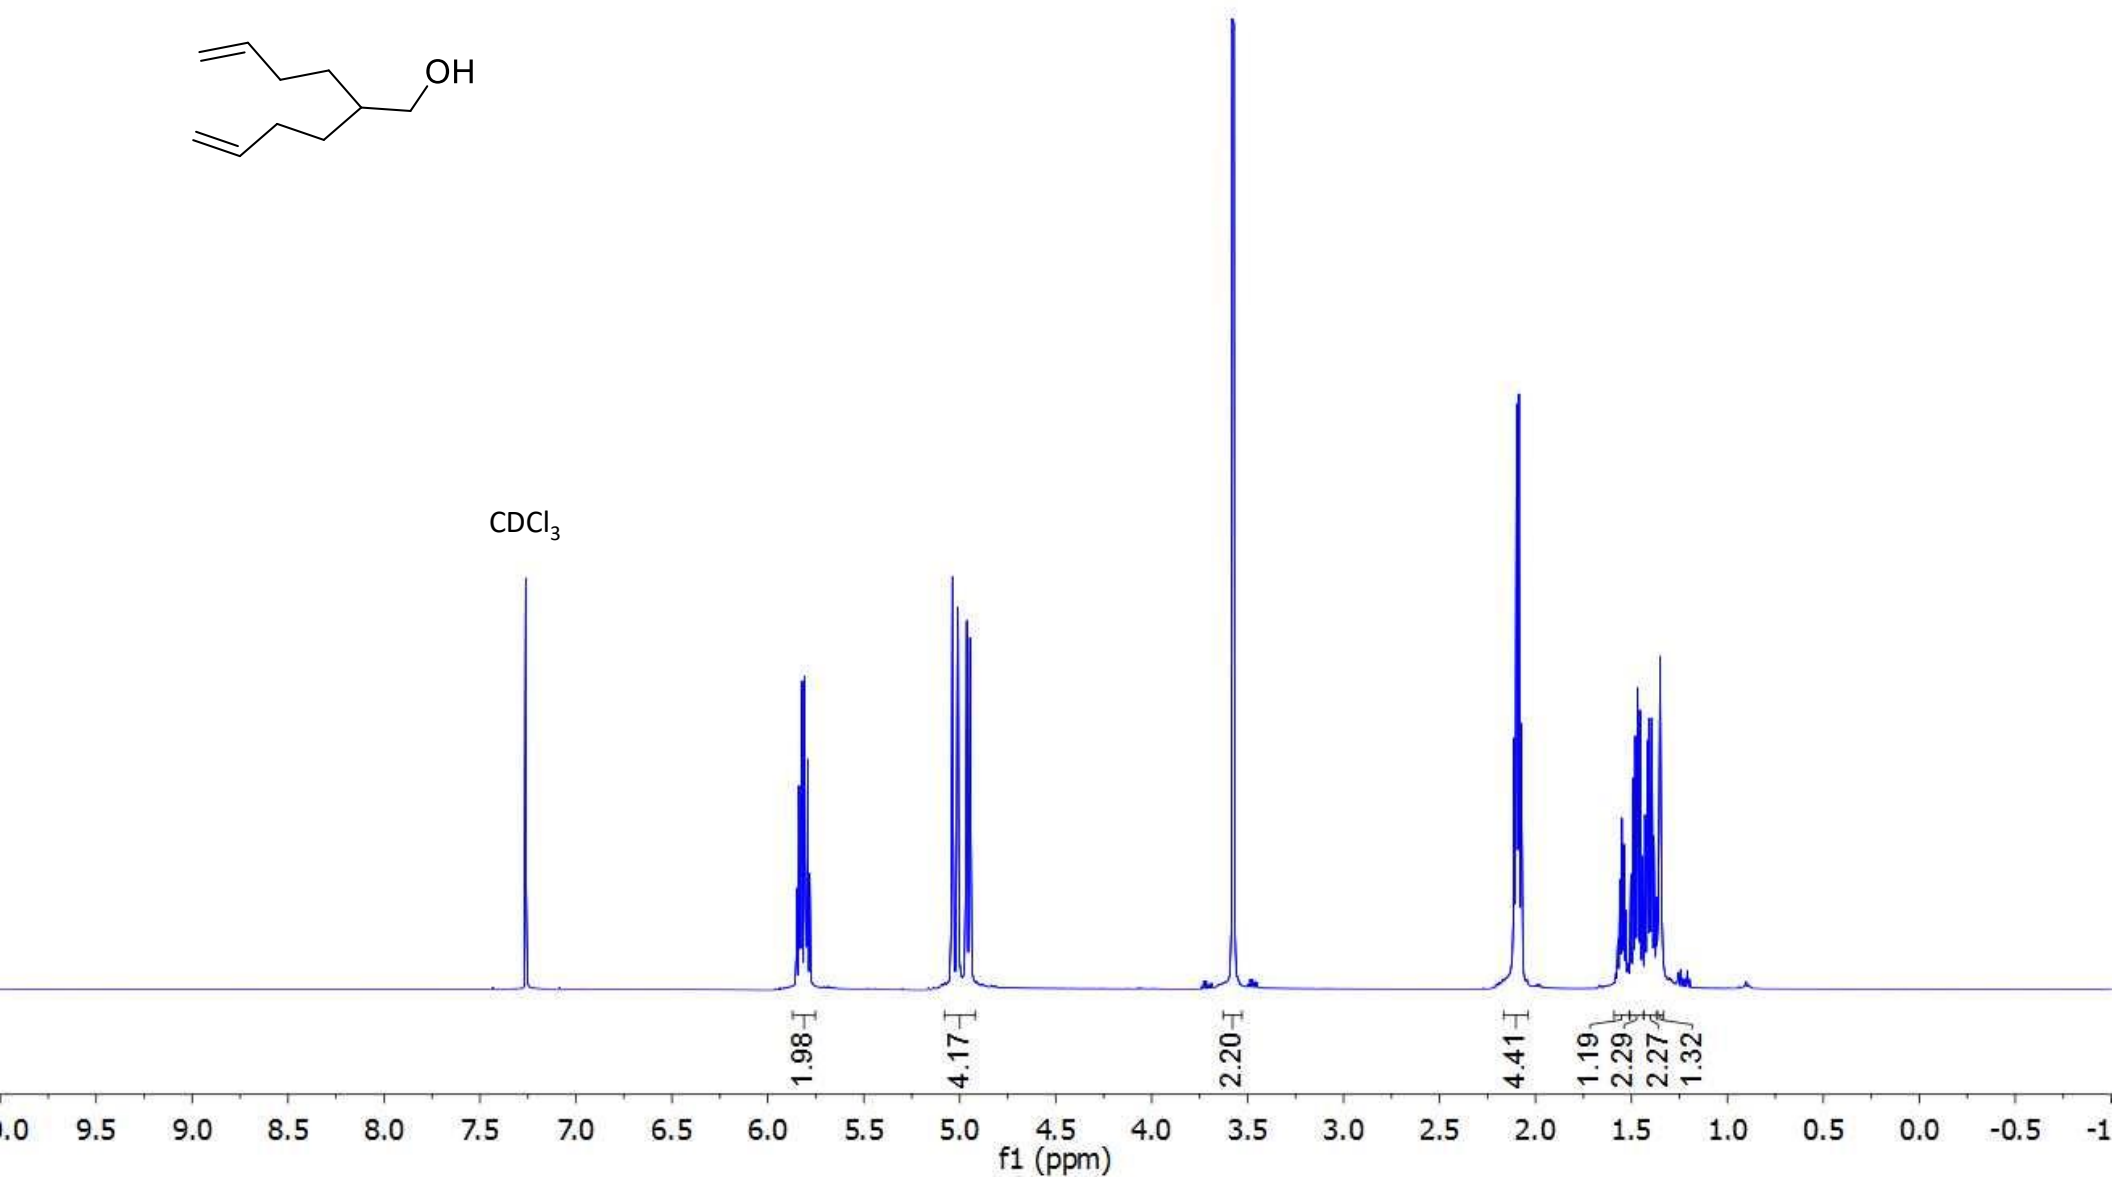

$^{13}\text{C}$  NMR (100 MHz,  $\text{CDCl}_3$ )

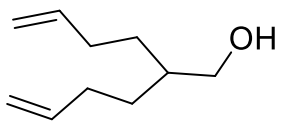

—139.03

—114.65

—65.28

—39.47

31.19

30.15

$\text{CDCl}_3$

190 180 170 160 150 140 130 120 110 100 90 80 70 60 50 40 30 20 10 0 -10  
f1 (ppm)

$^1\text{H}$  NMR (400 MHz,  $\text{CDCl}_3$ )

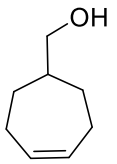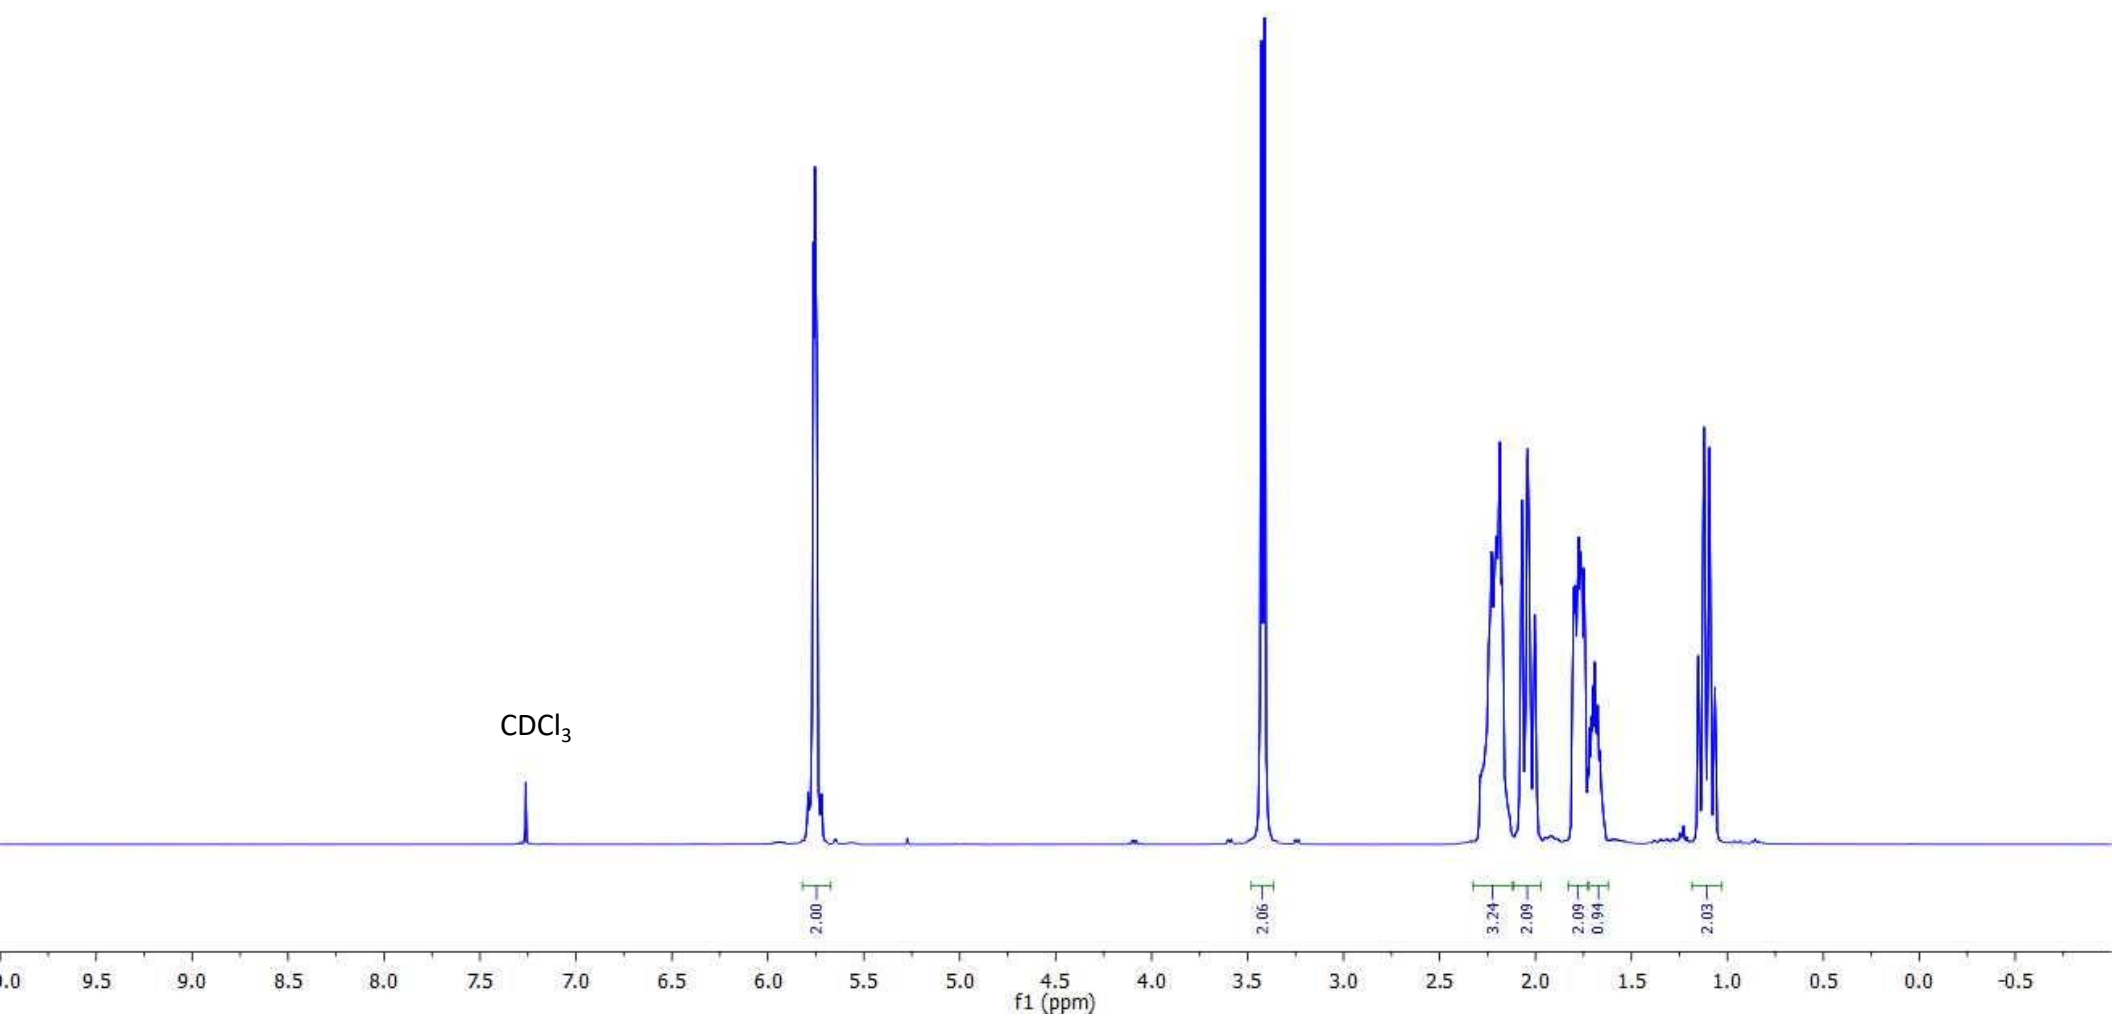

$^{13}\text{C}$  NMR (100 MHz,  $\text{CDCl}_3$ )

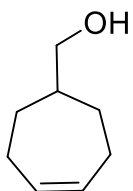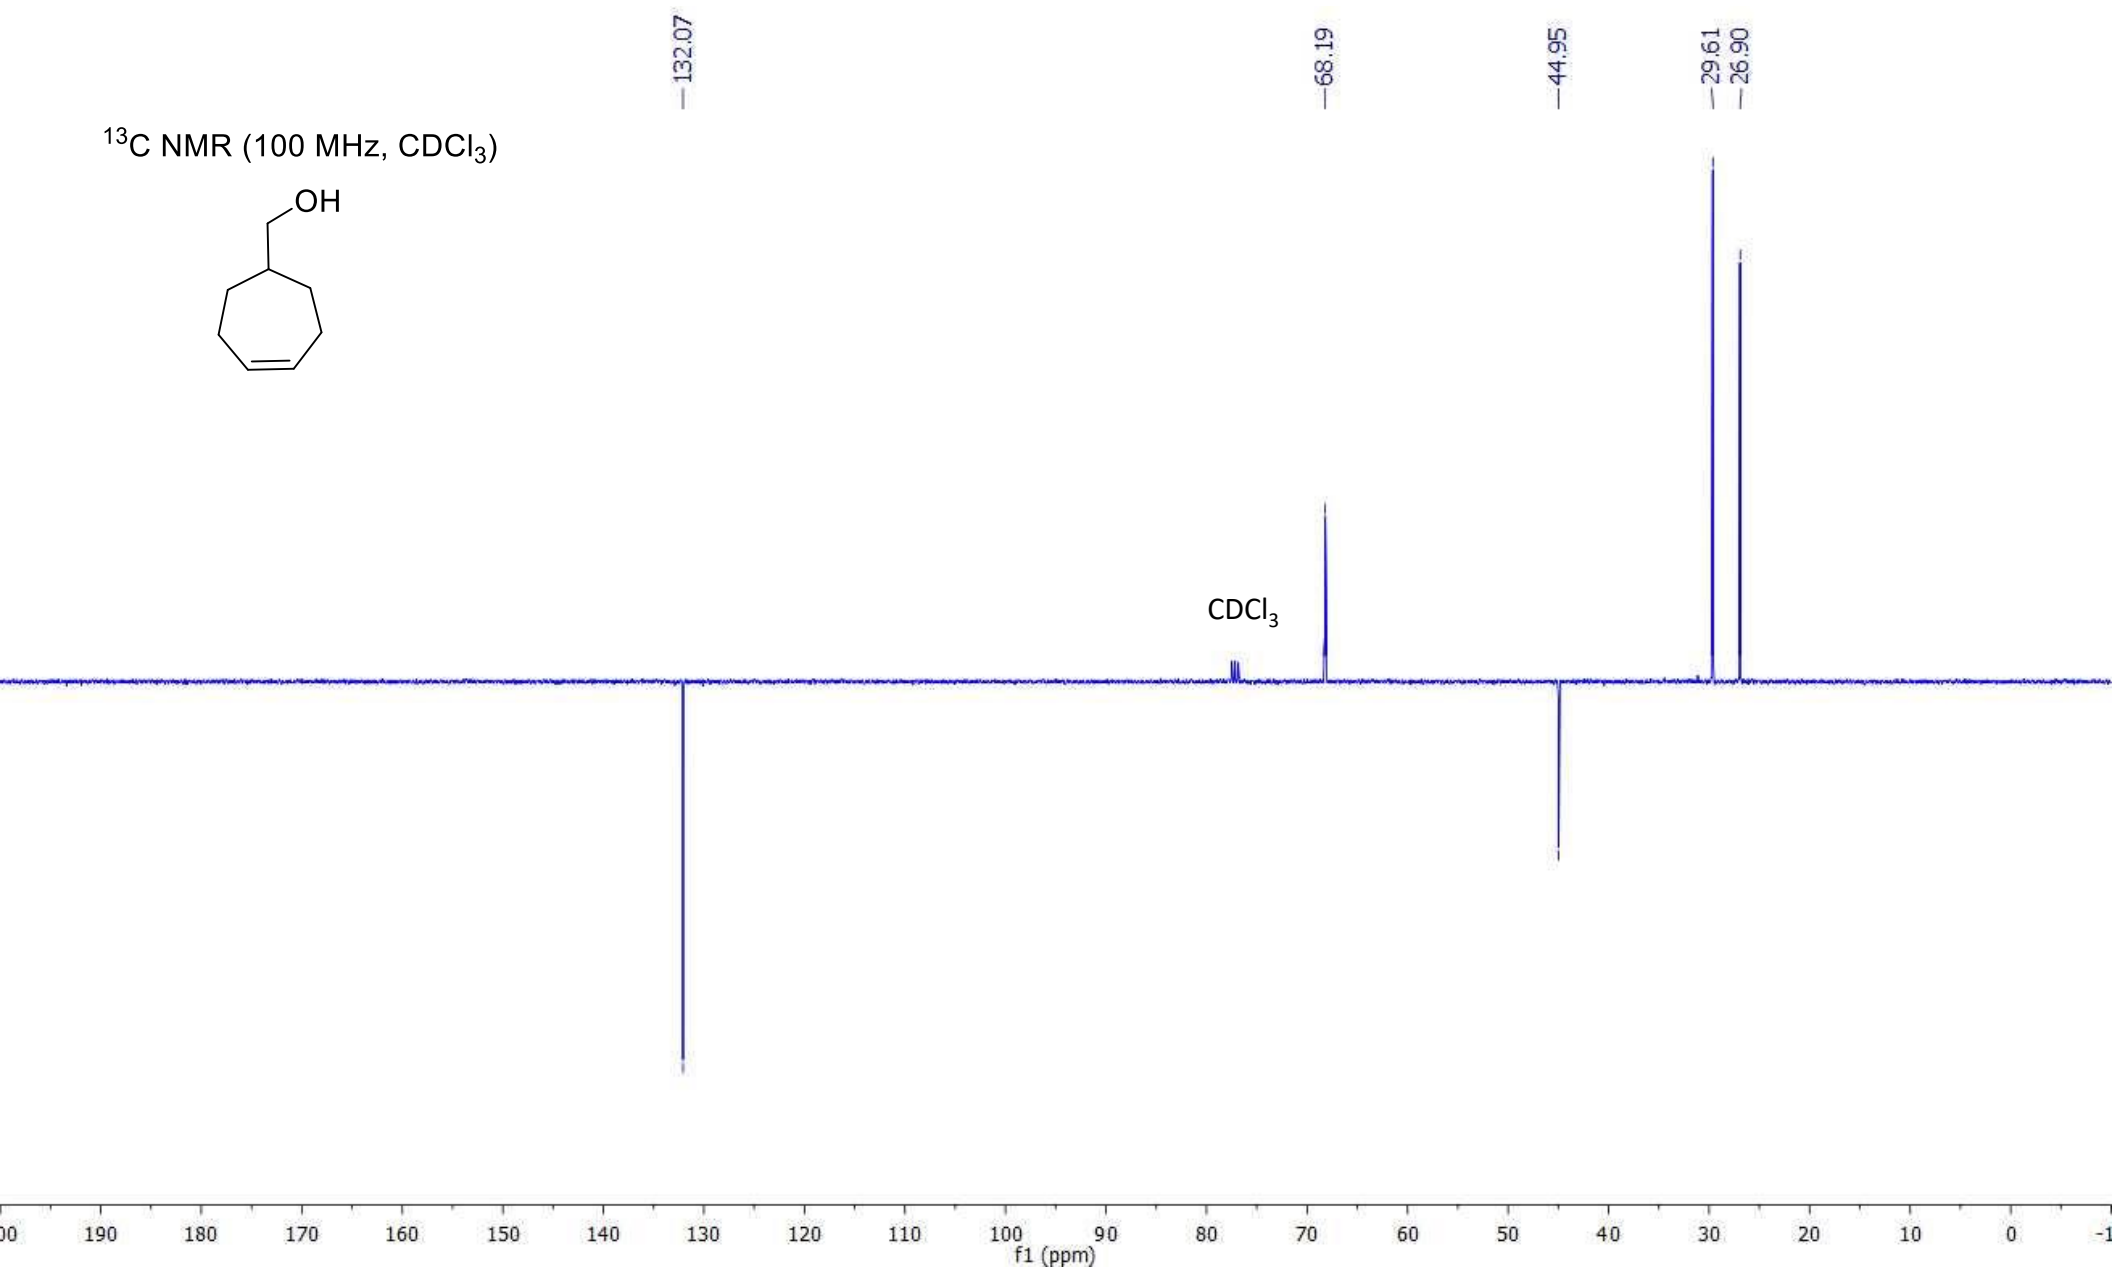

$^1\text{H}$  NMR (600 MHz,  $\text{CDCl}_3$ )

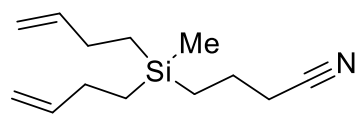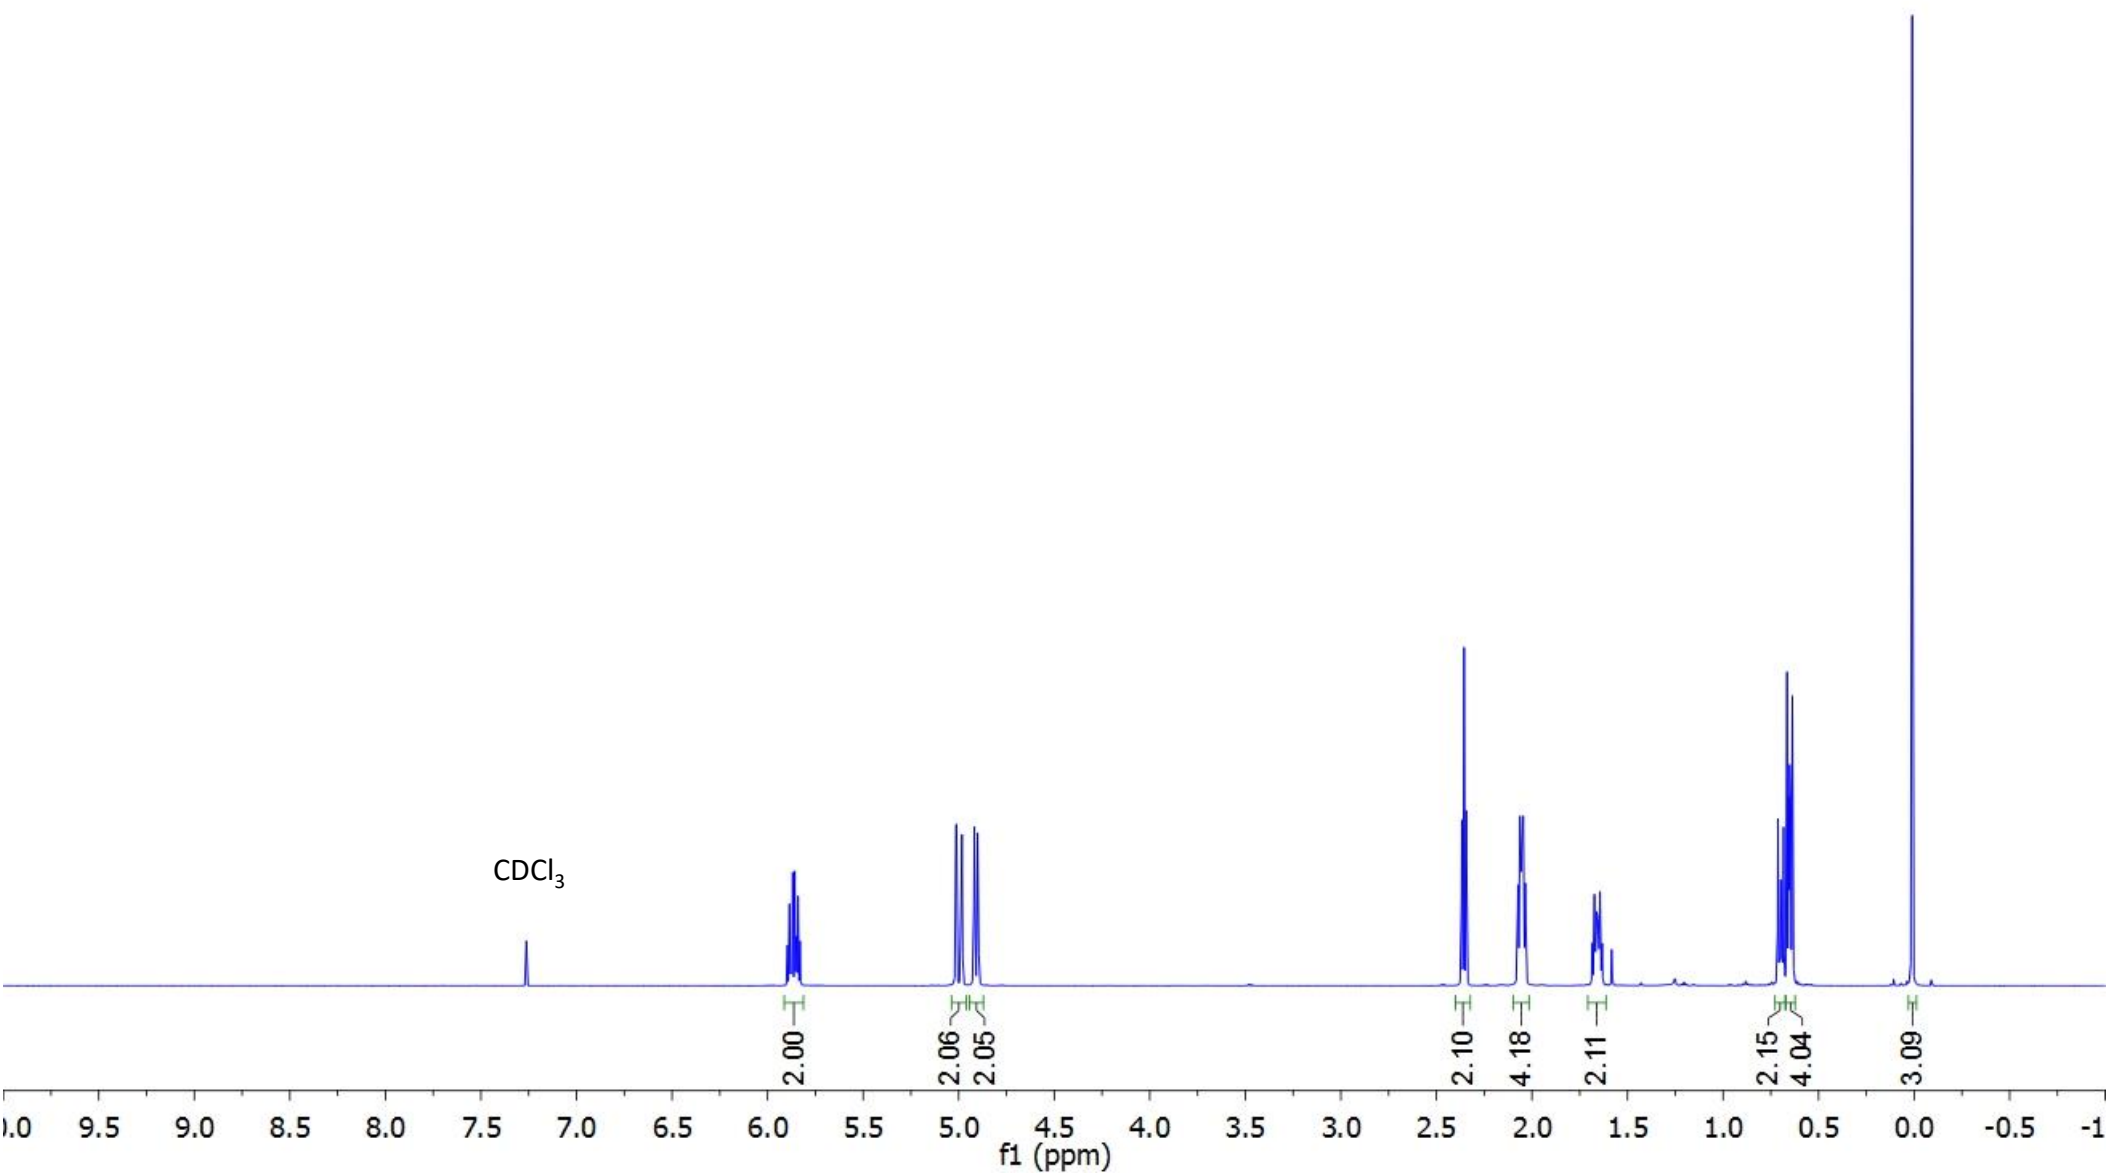

$^{13}\text{C}$  NMR (150 MHz,  $\text{CDCl}_3$ )

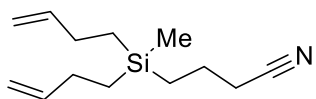

—141.33

—119.81

—113.19

—27.90

—21.09

—20.72

—13.76

—12.78

—5.17

$\text{CDCl}_3$

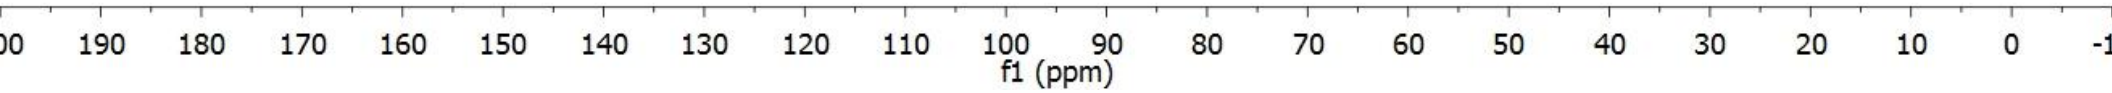

<sup>1</sup>H NMR (400 MHz, CDCl<sub>3</sub>)

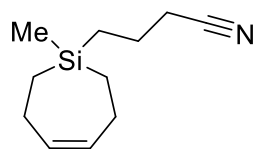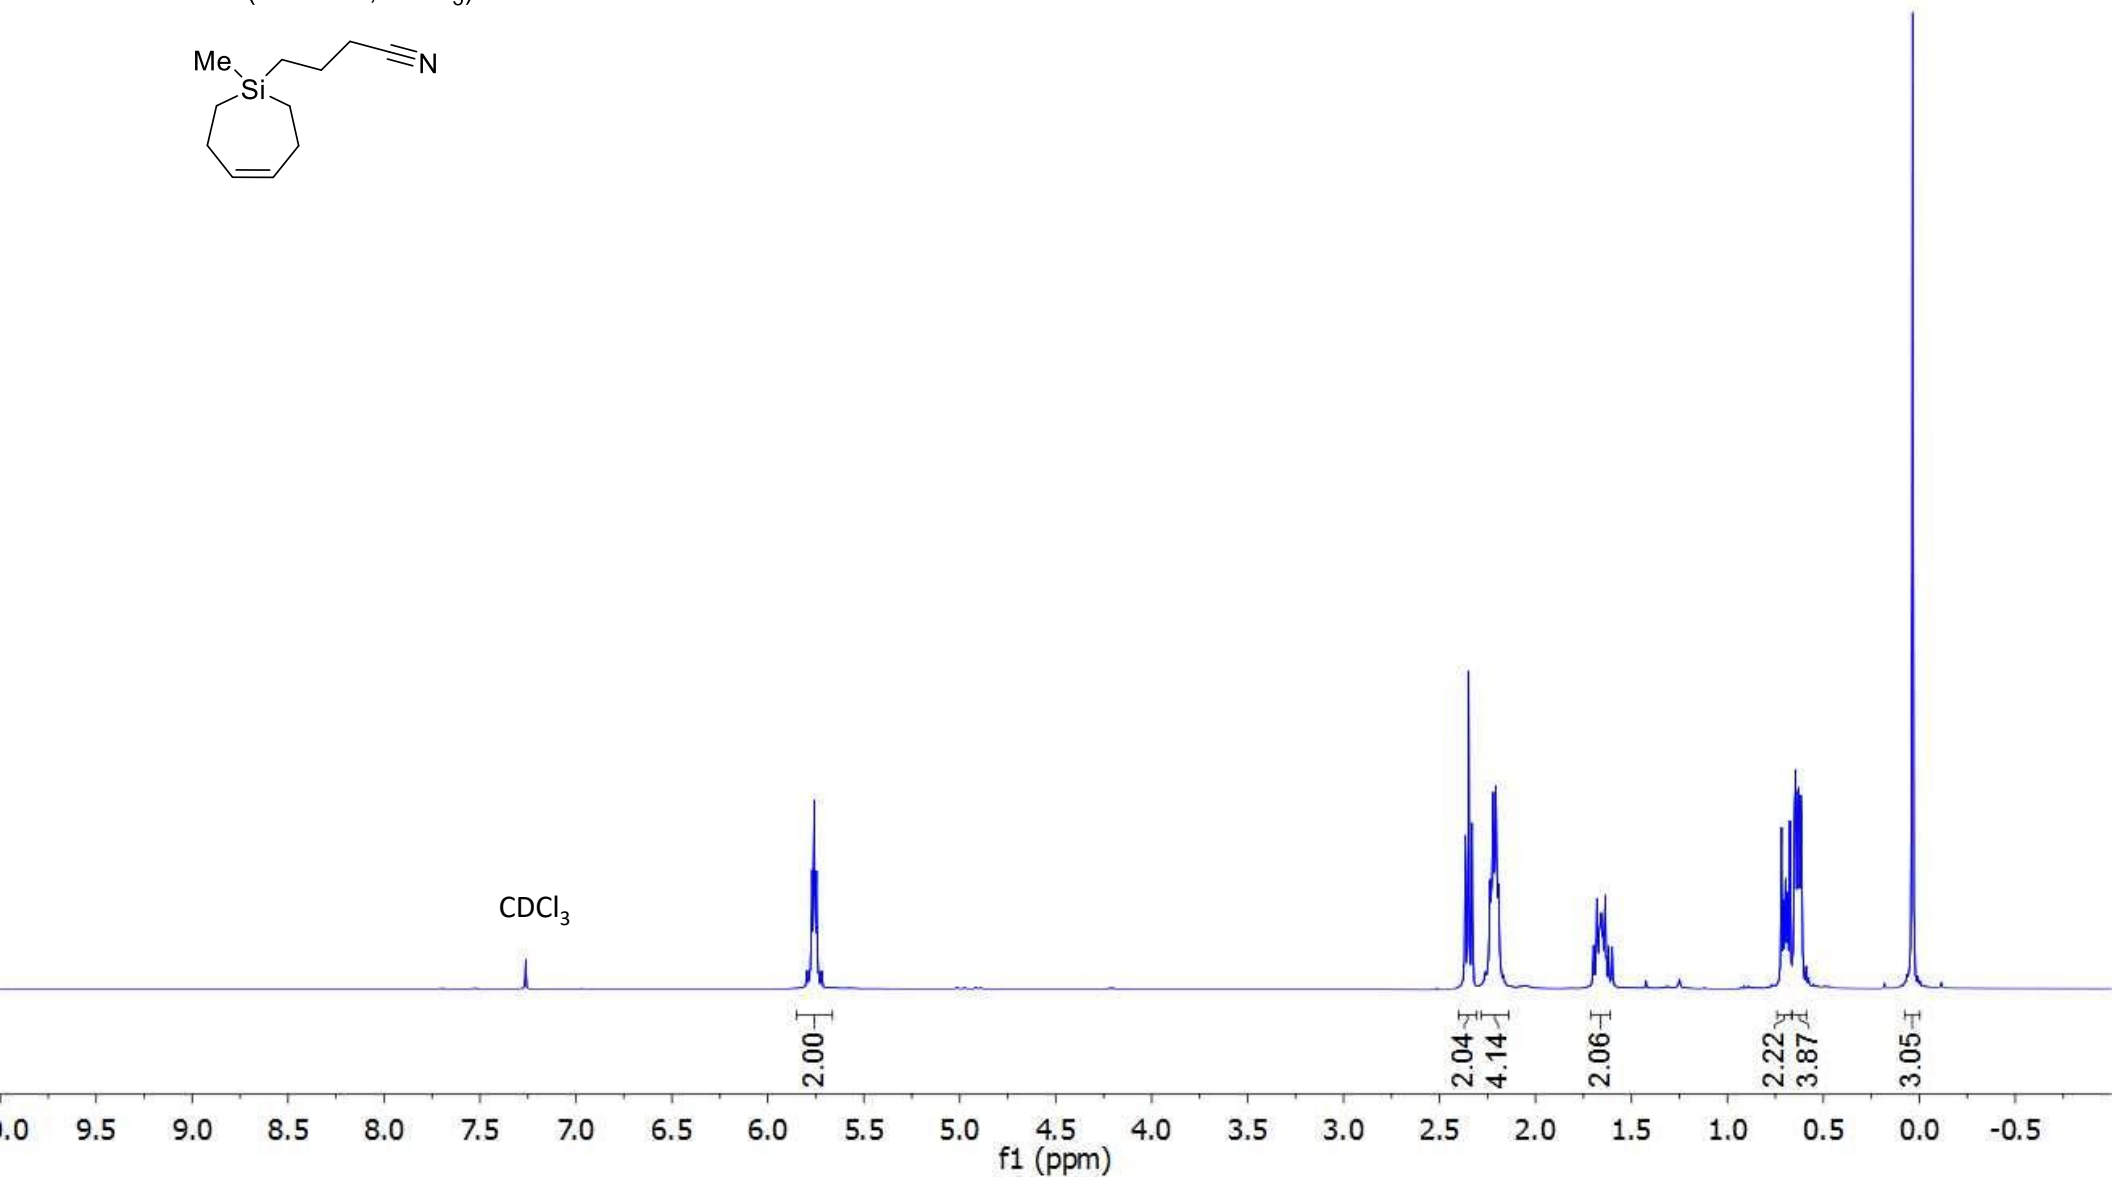

$^{13}\text{C}$  NMR (100 MHz,  $\text{CDCl}_3$ )

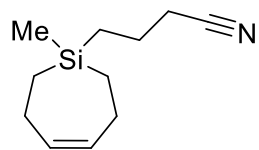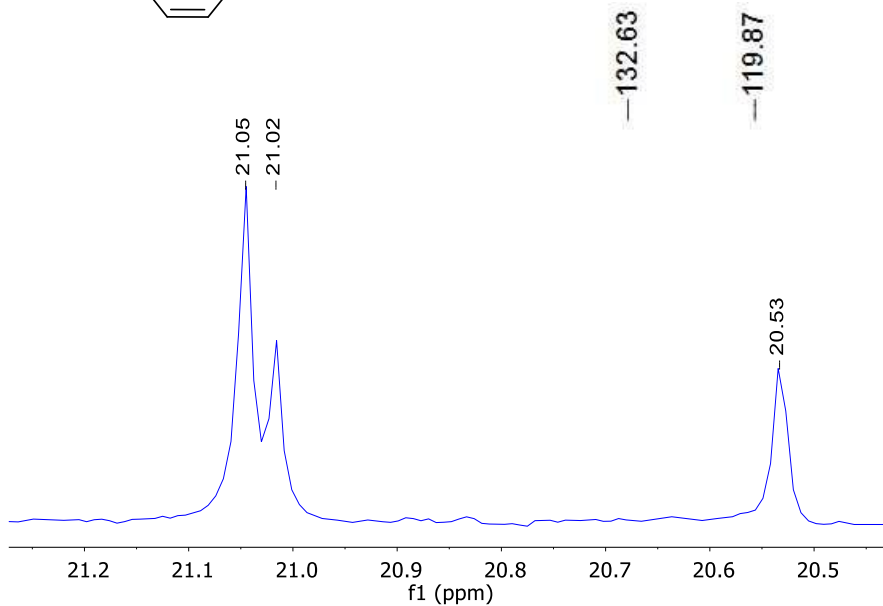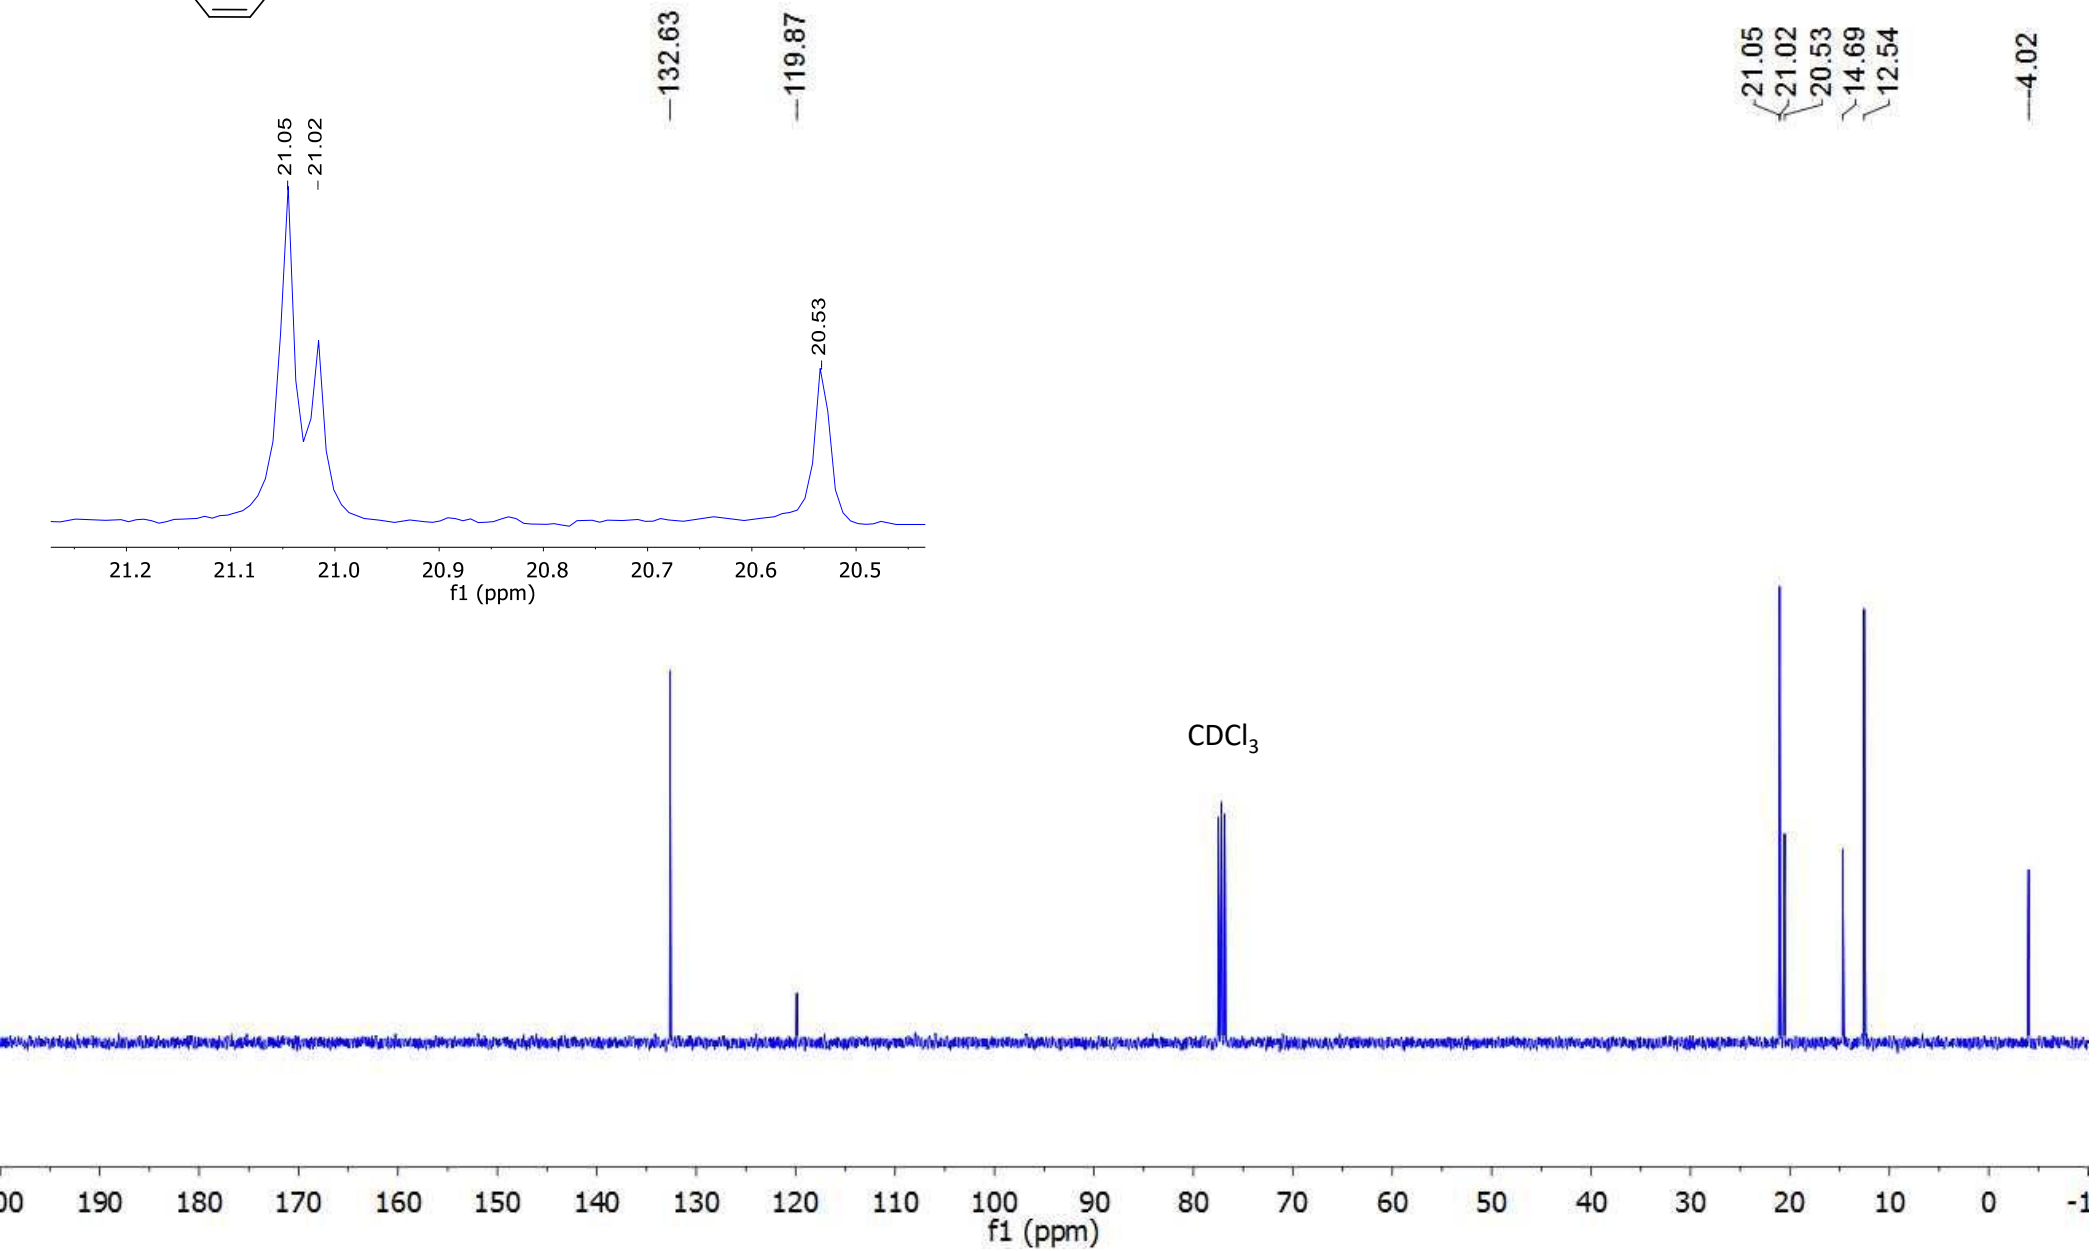



$^1\text{H}$  NMR (400 MHz,  $\text{CDCl}_3$ )

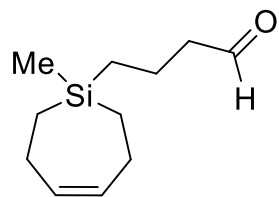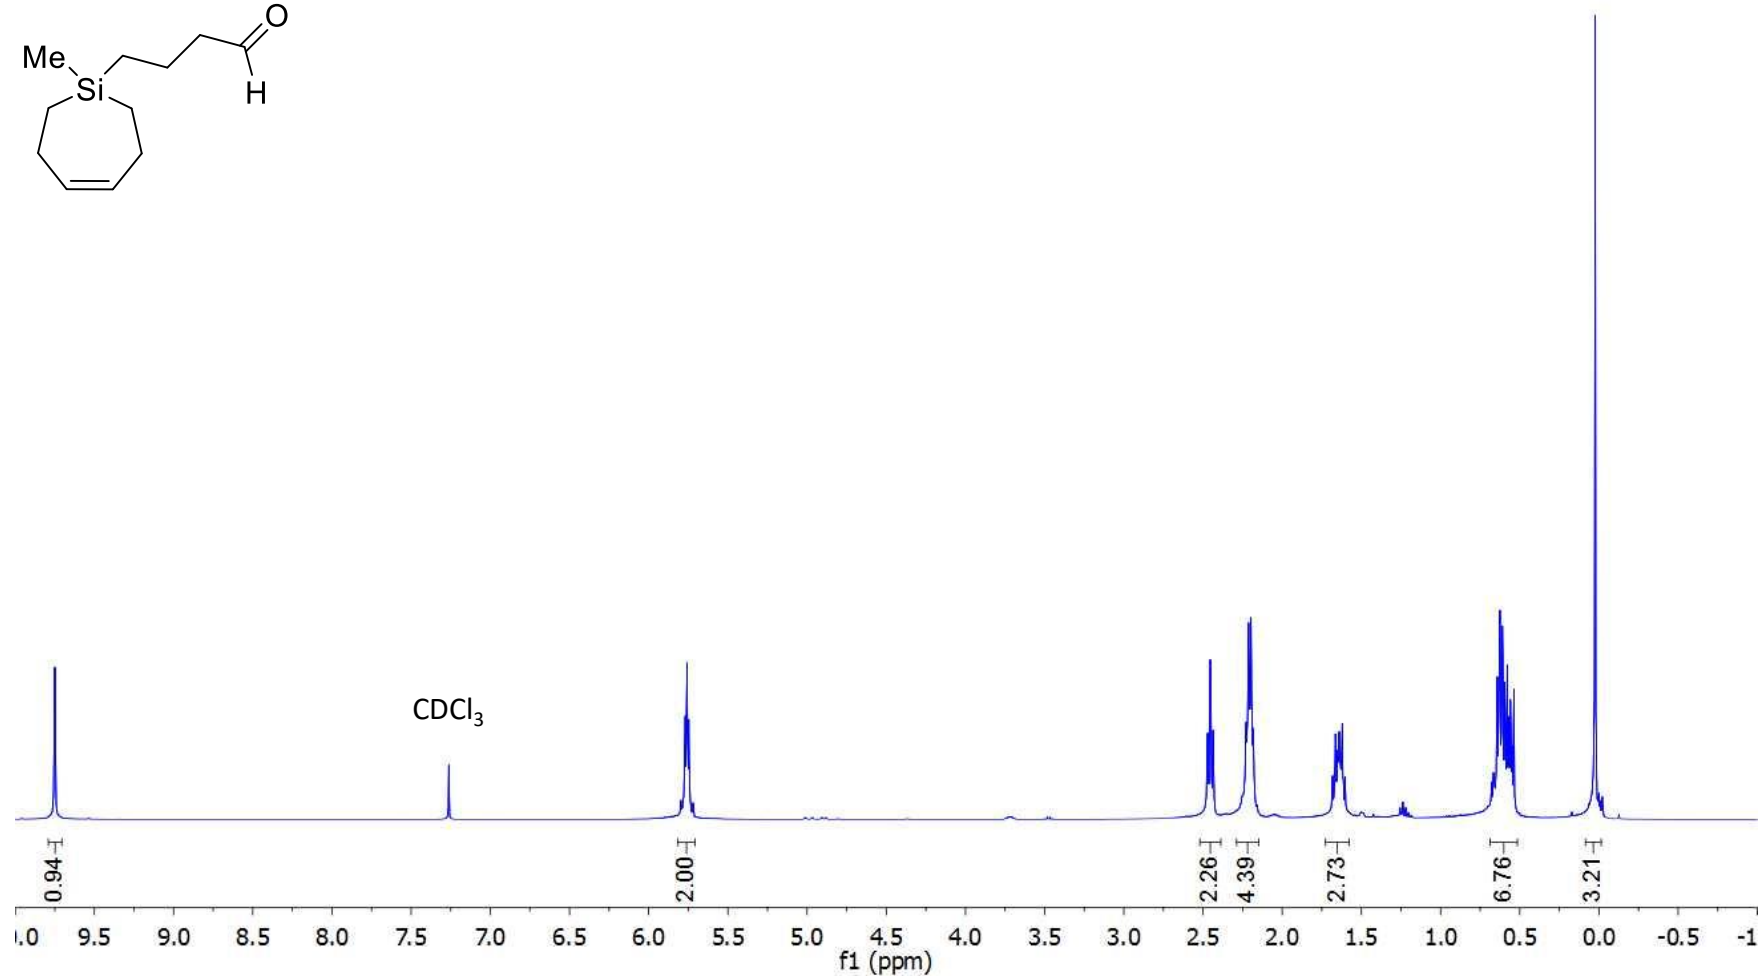

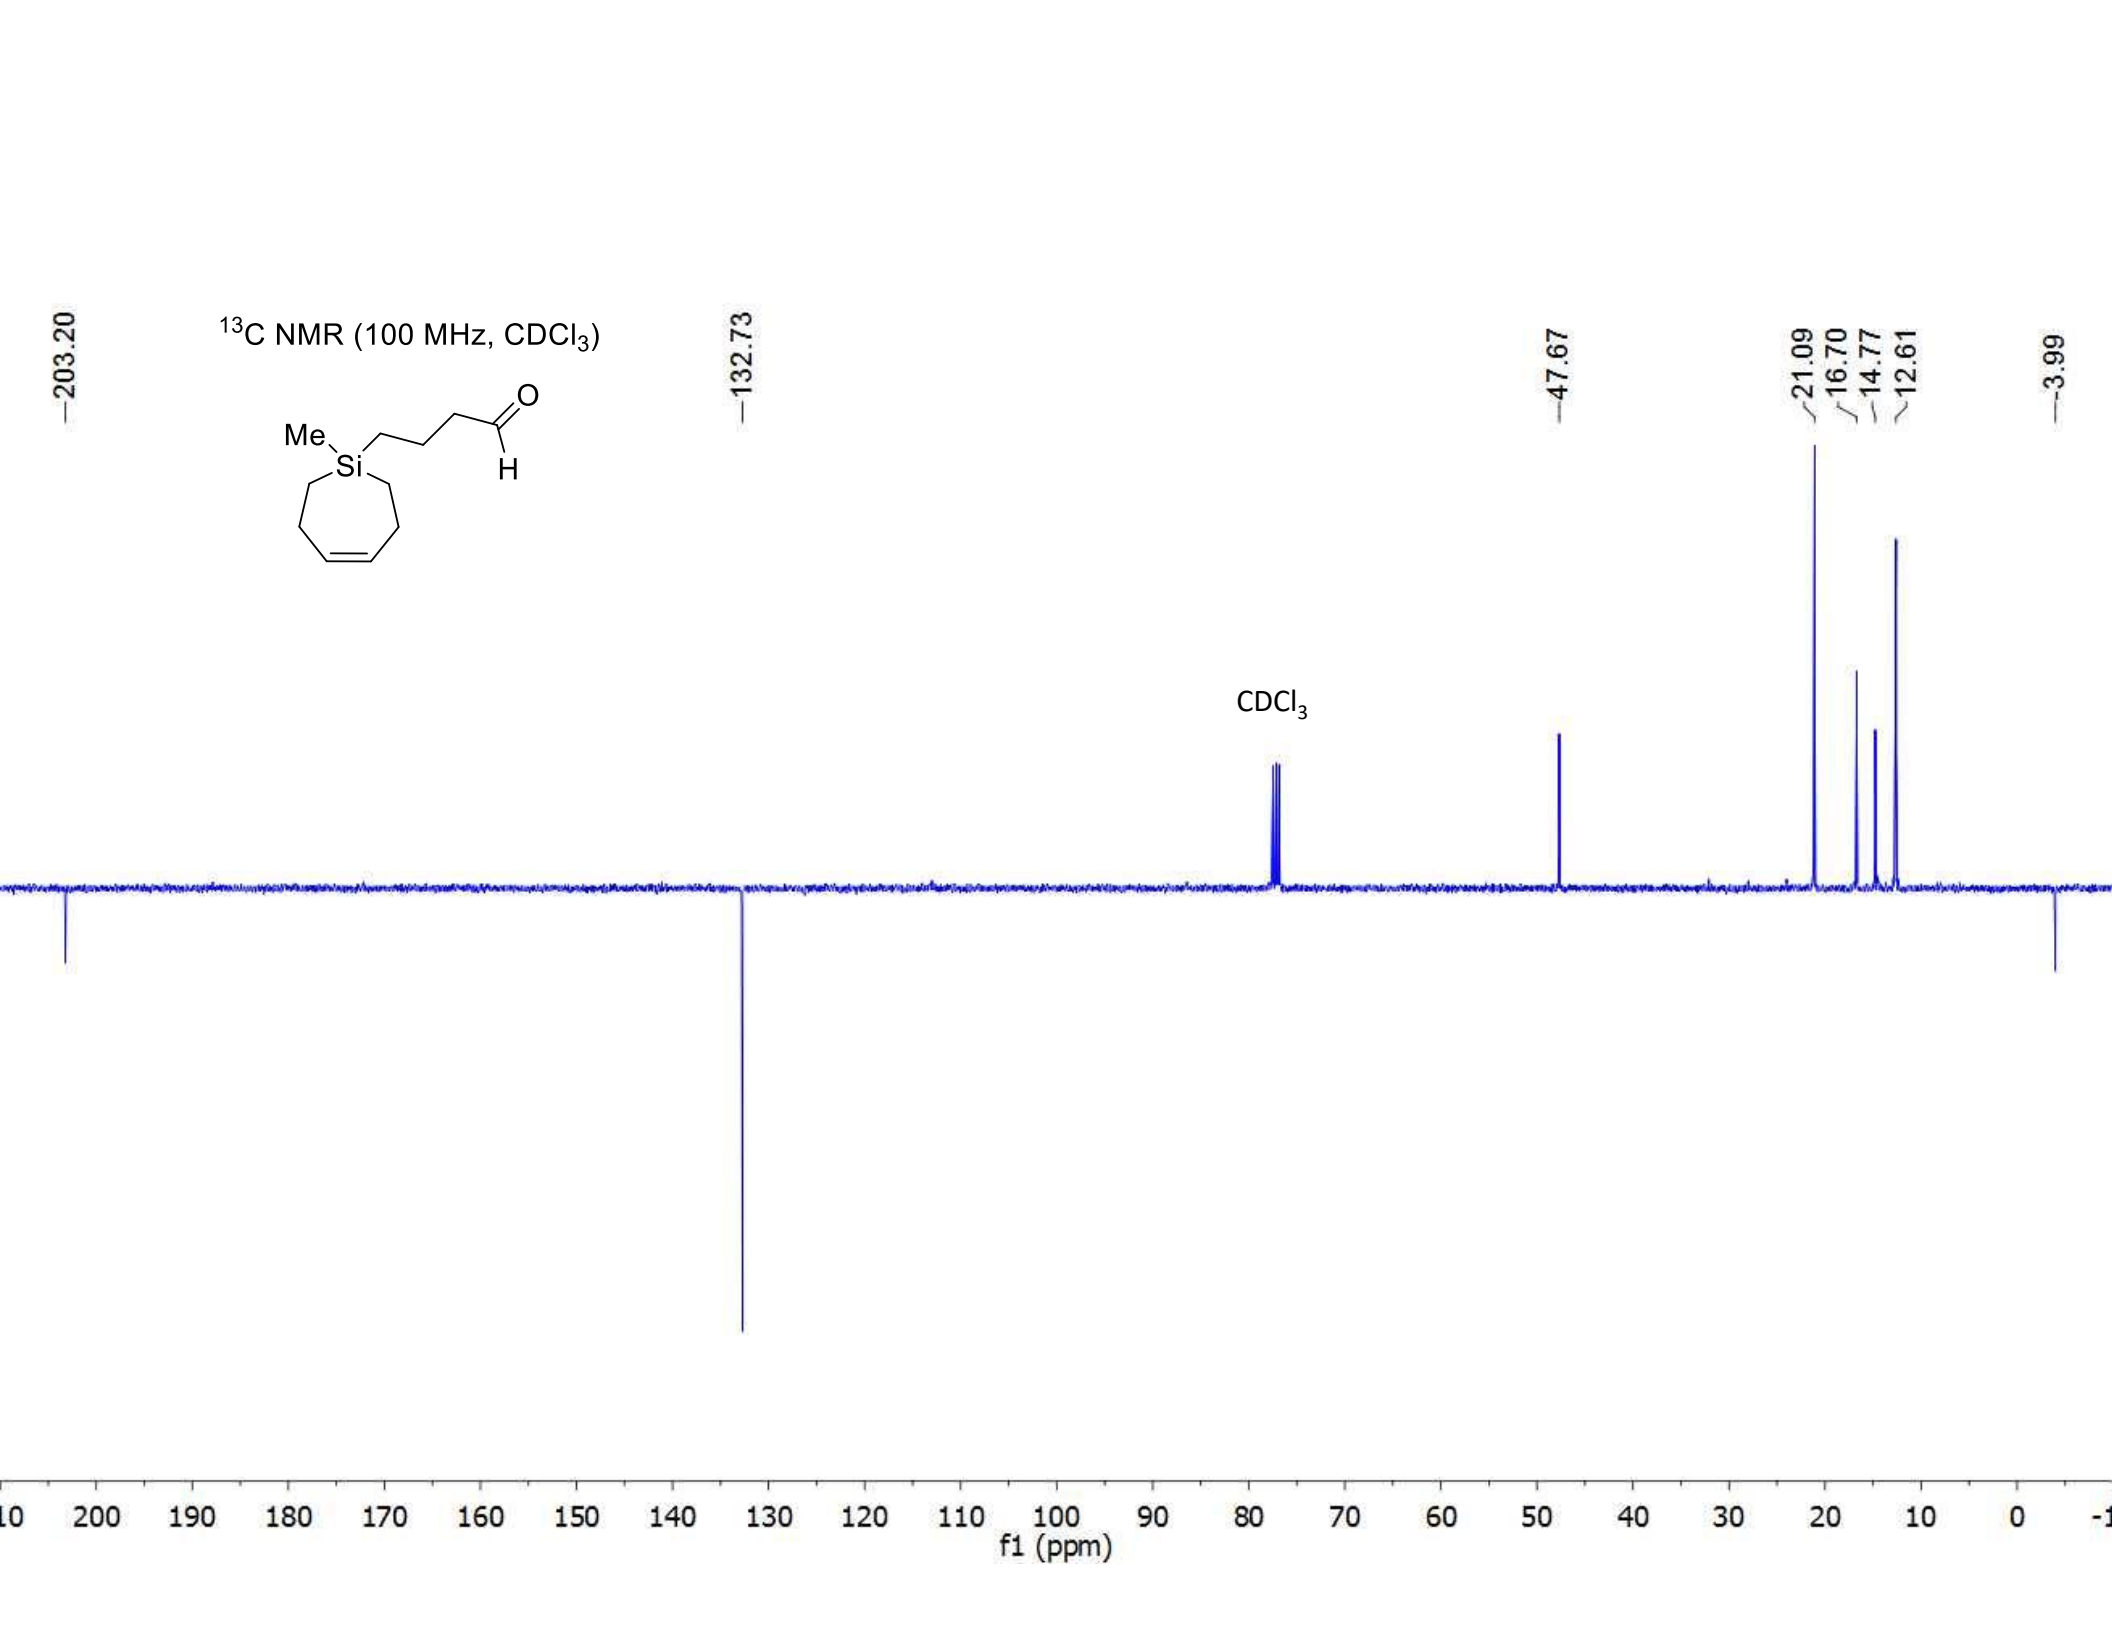

$^1\text{H}$  NMR (400 MHz,  $\text{CDCl}_3$ )

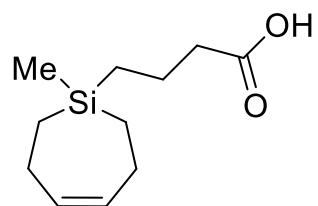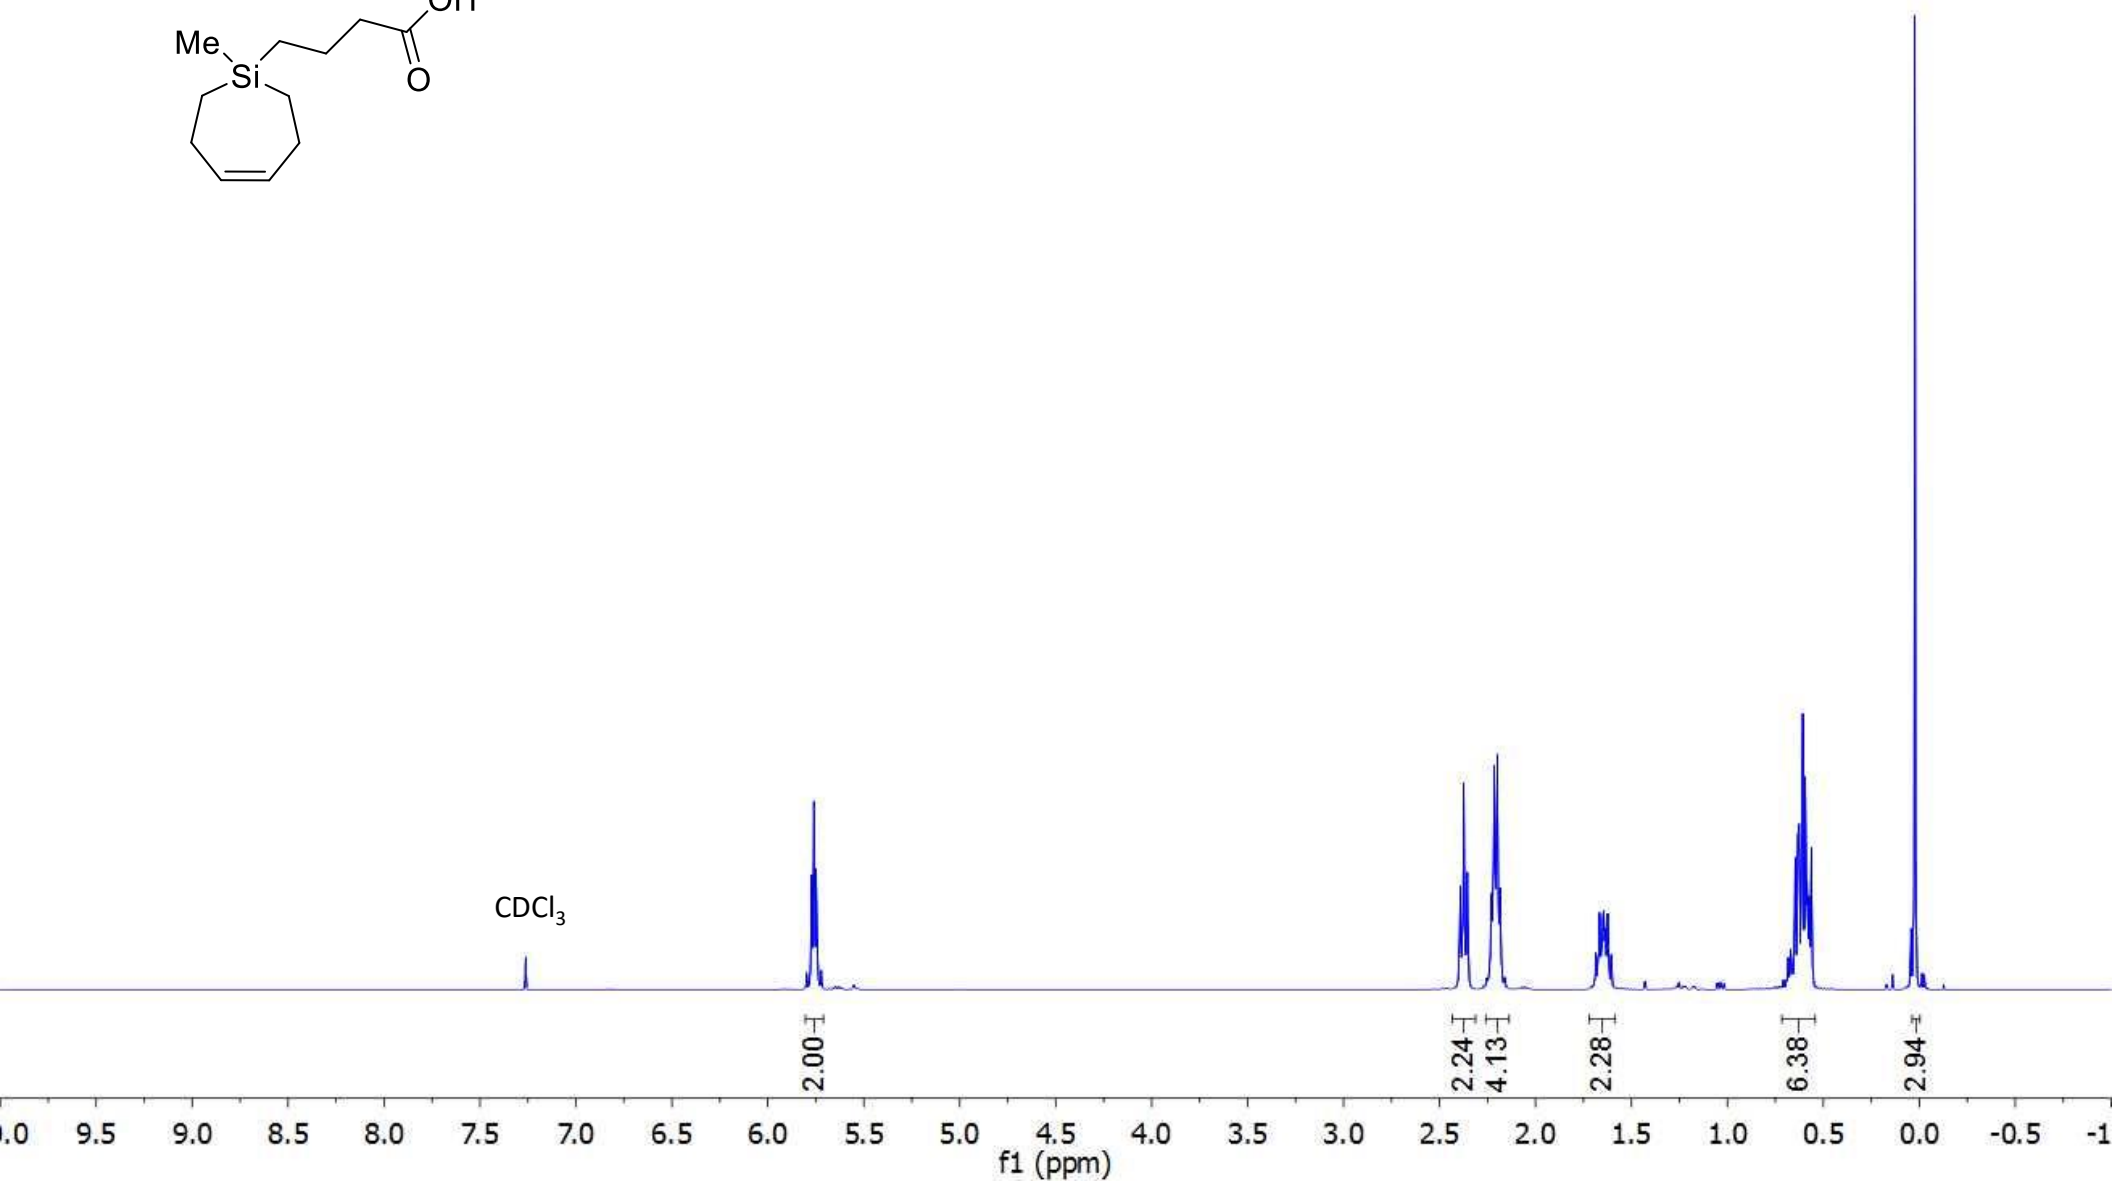

$^{13}\text{C}$  NMR (100 MHz,  $\text{CDCl}_3$ )

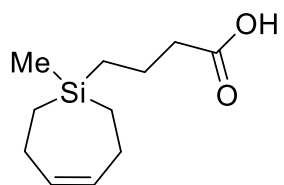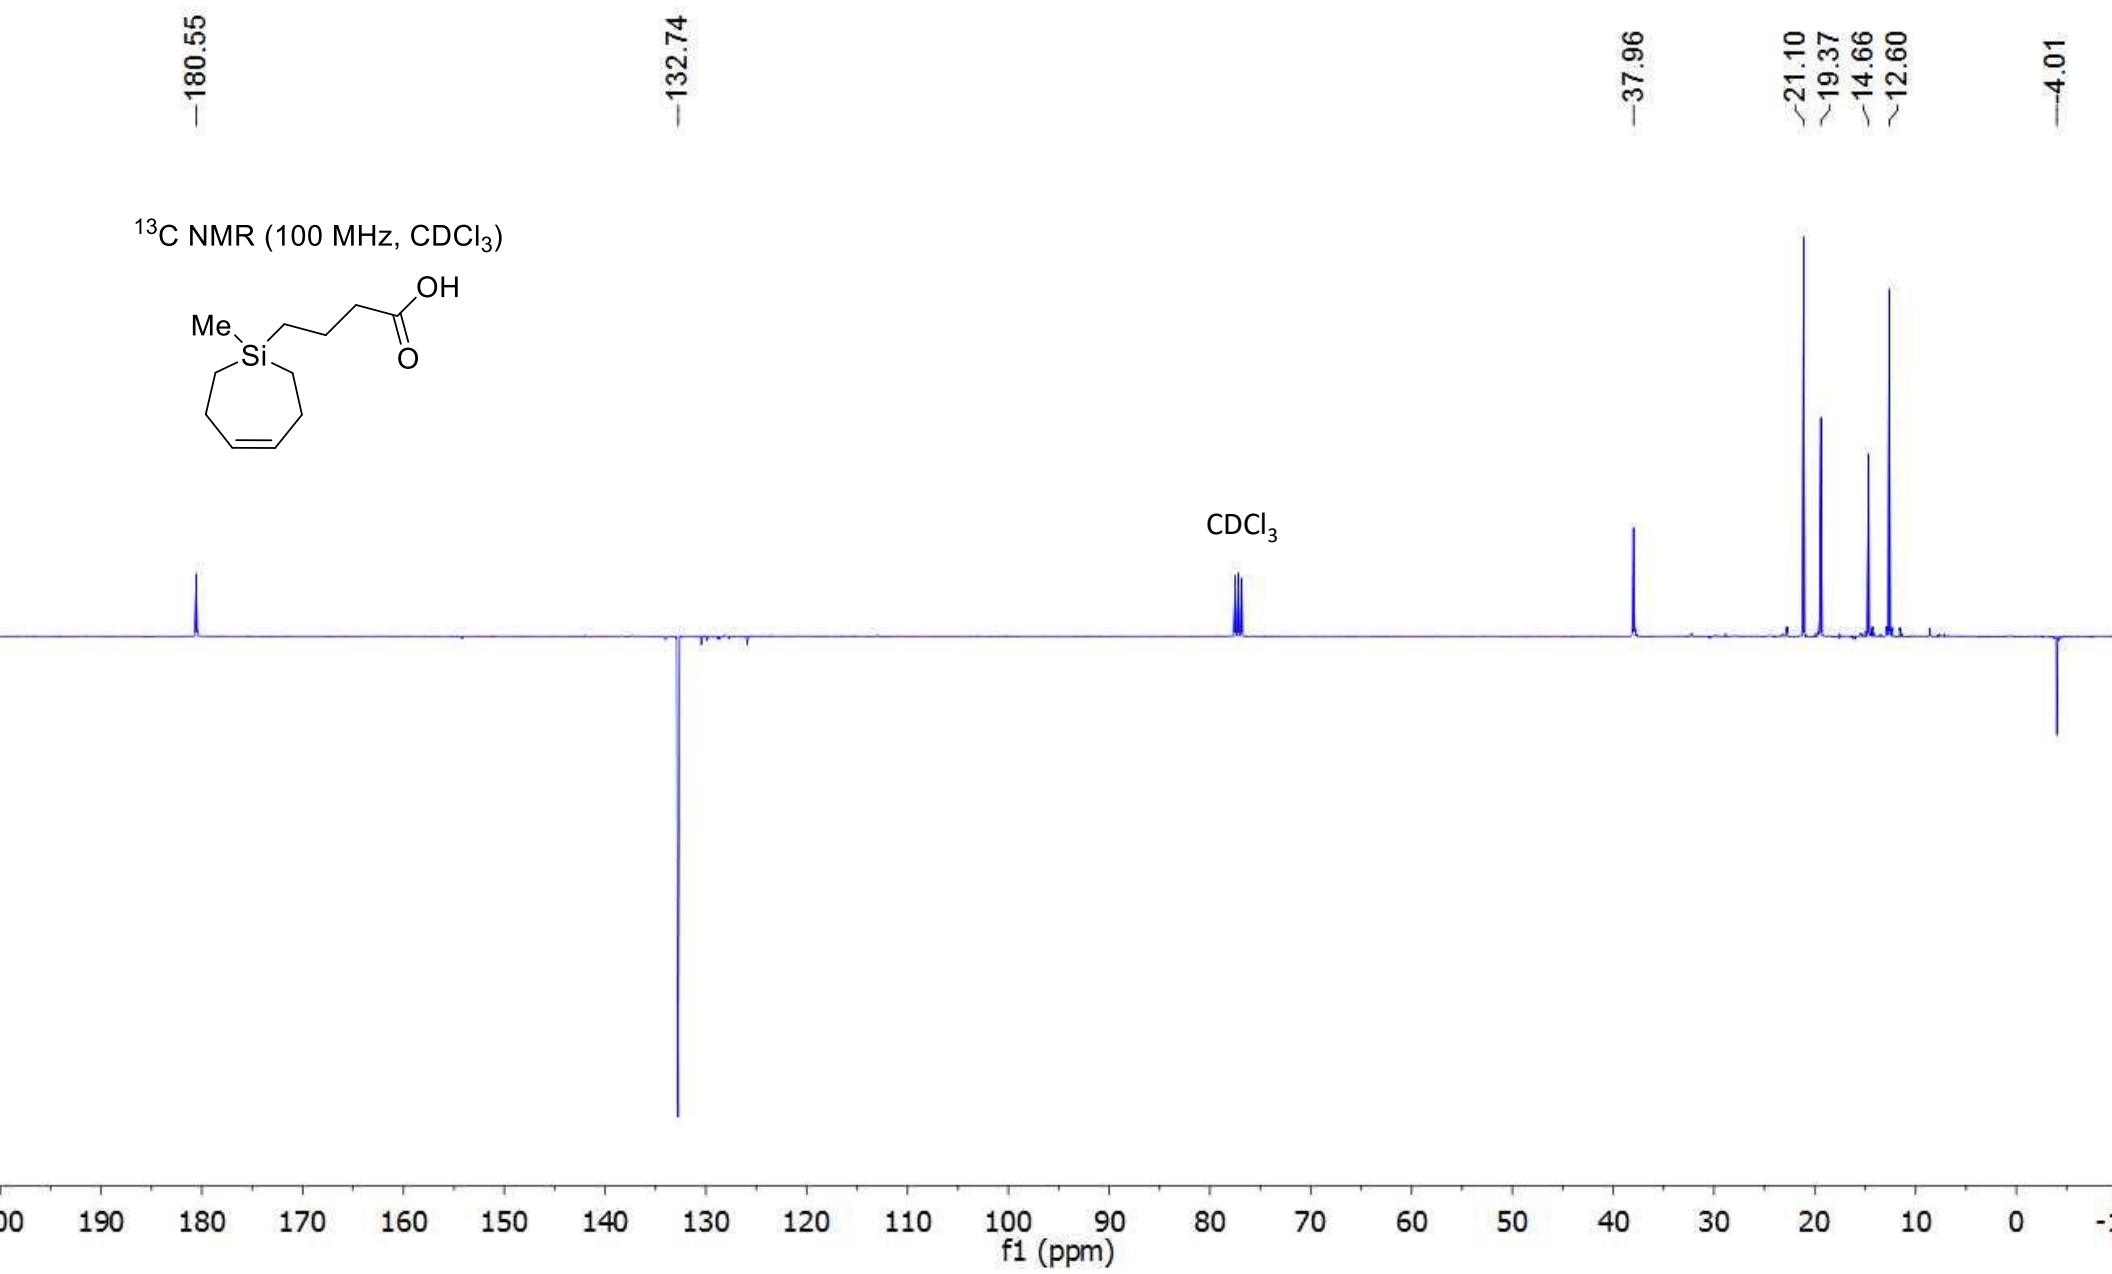

$^1\text{H}$  NMR (400 MHz,  $\text{CDCl}_3$ )

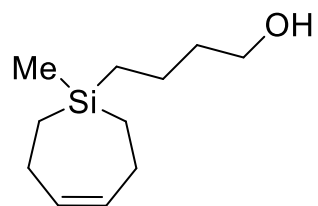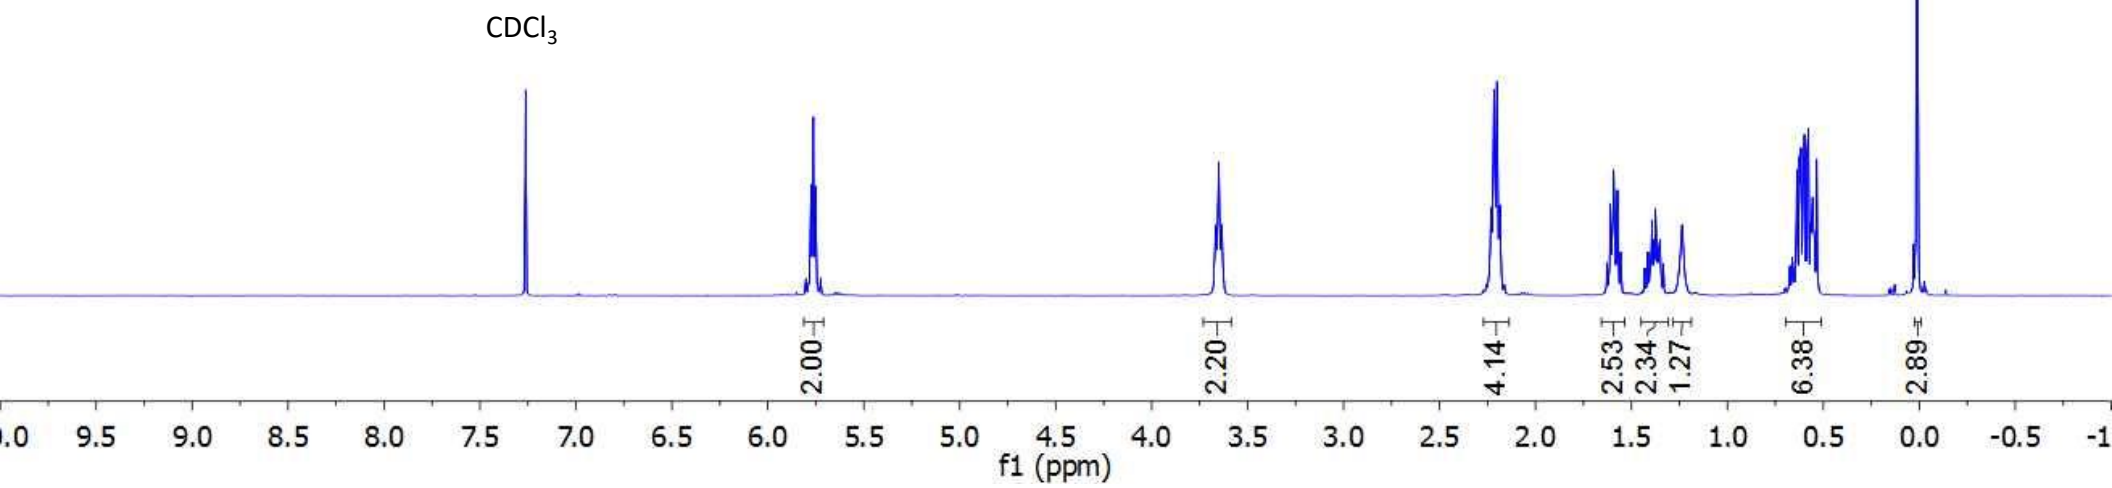

<sup>13</sup>C NMR (150 MHz, CDCl<sub>3</sub>)

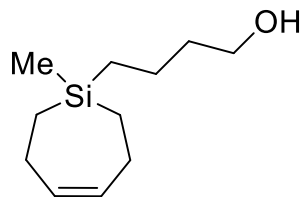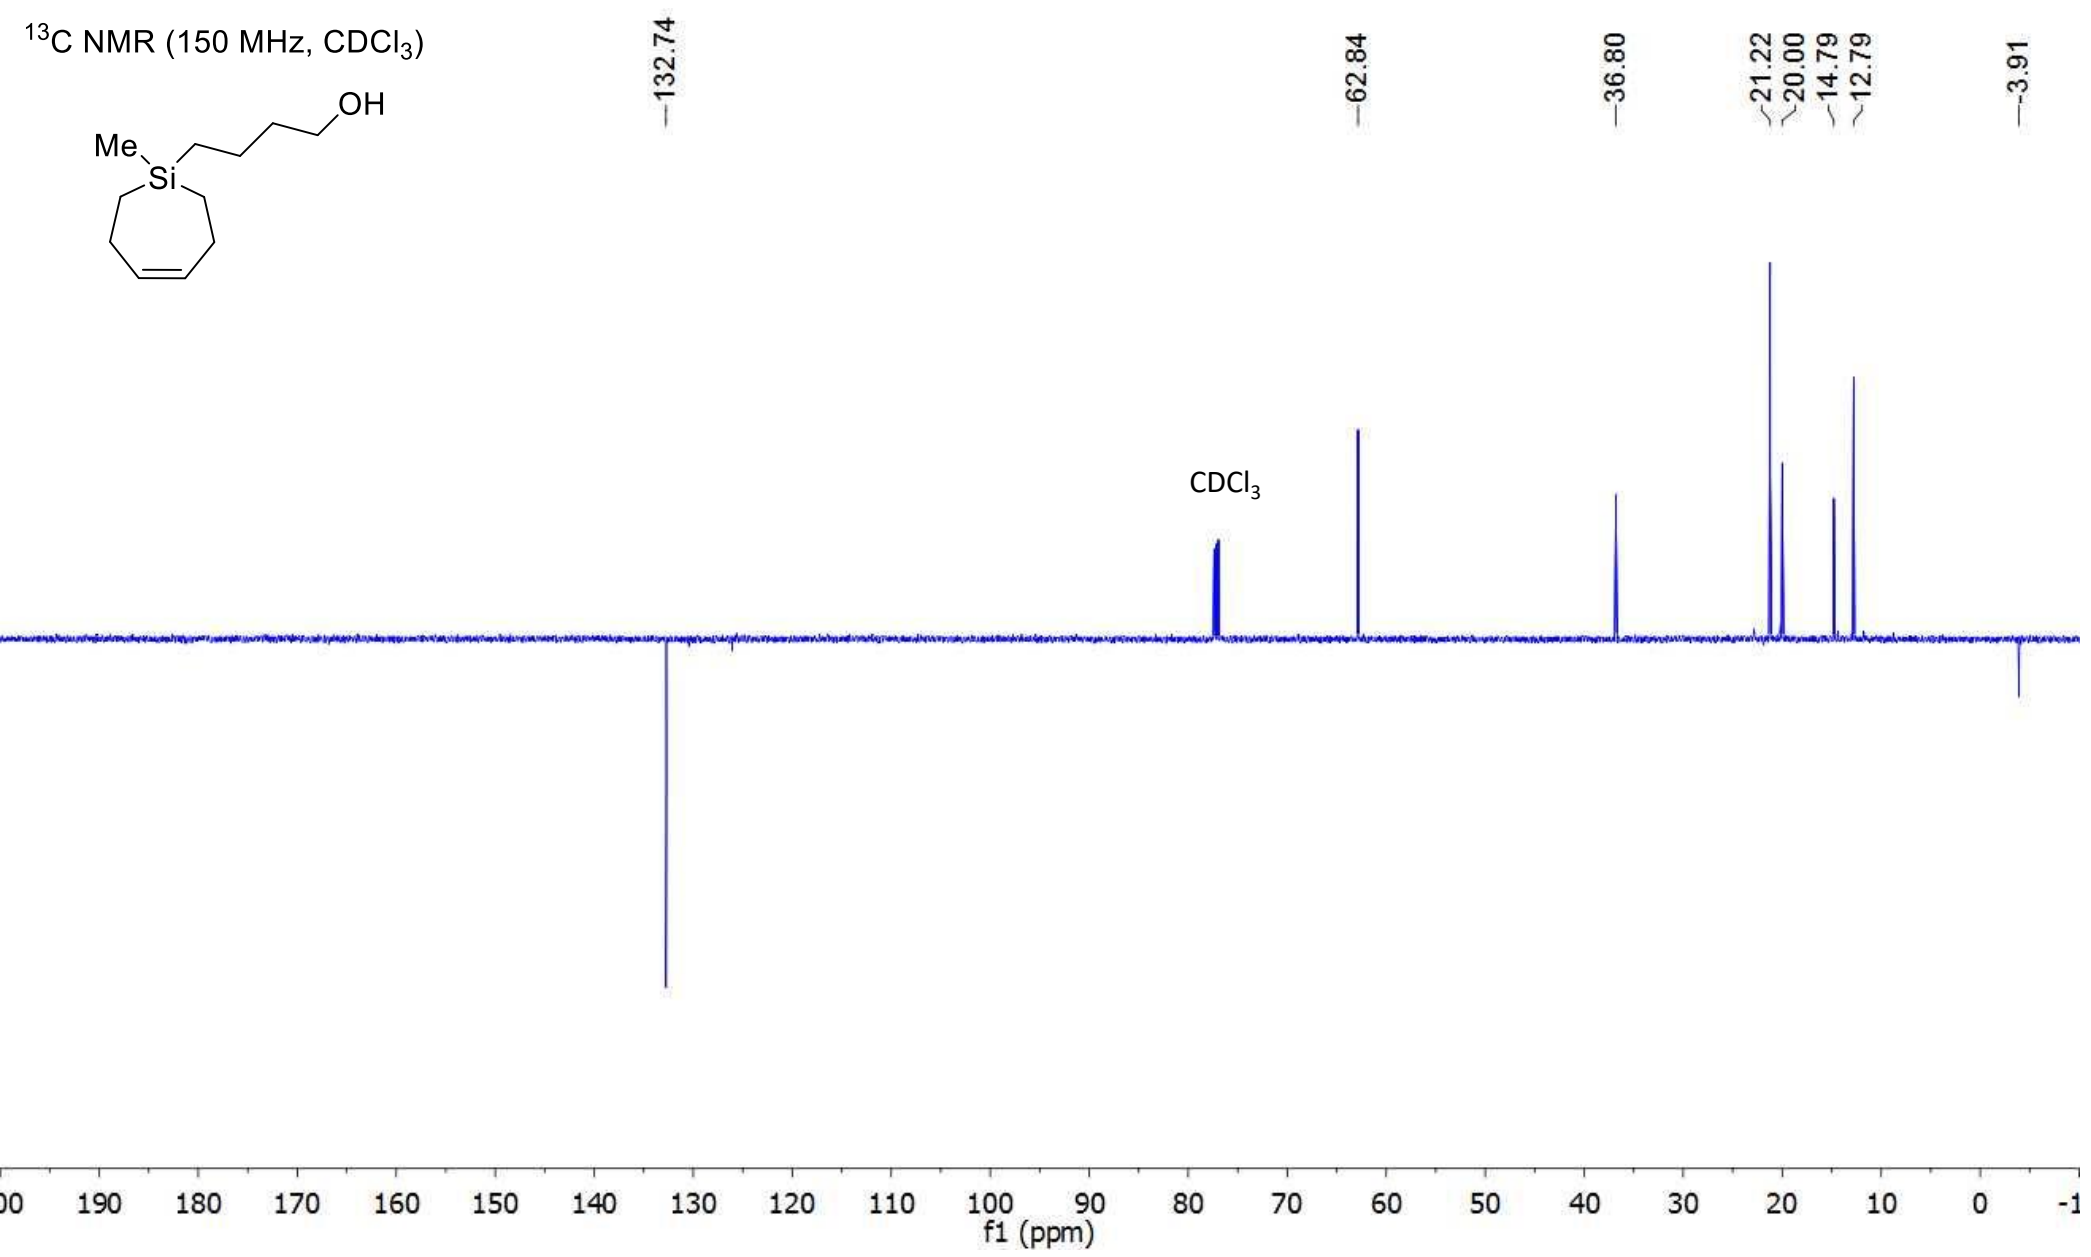

$^1\text{H}$  NMR (600 MHz,  $\text{CDCl}_3$ )

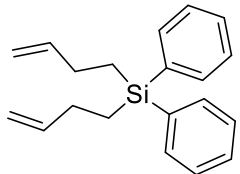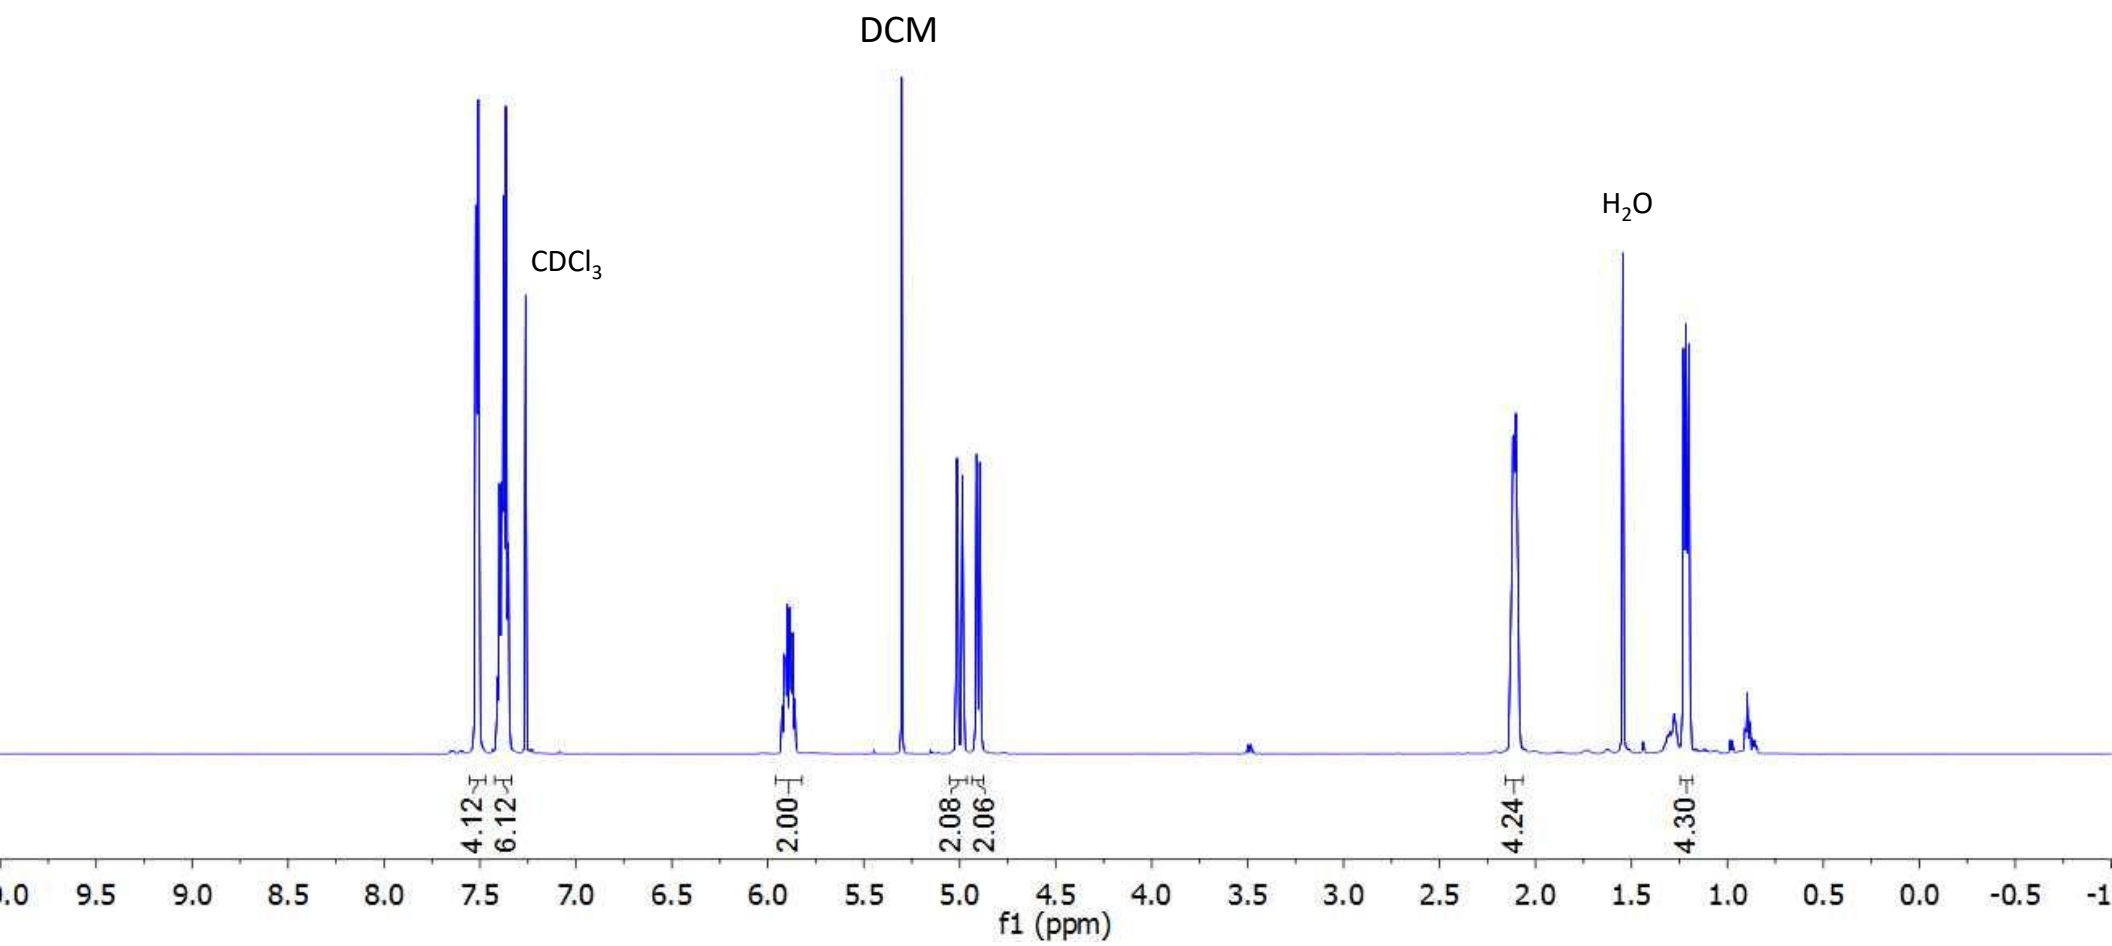

$^{13}\text{C}$  NMR (100 MHz,  $\text{CDCl}_3$ )

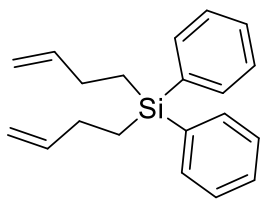

141.39

135.83

135.02

129.41

127.99

113.11

$\text{CDCl}_3$

27.85

11.75

190 180 170 160 150 140 130 120 110 100 90 80 70 60 50 40 30 20 10 0 -1  
f1 (ppm)



$^1\text{H}$  NMR (600 MHz,  $\text{CDCl}_3$ )

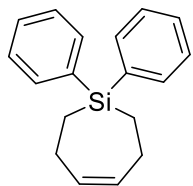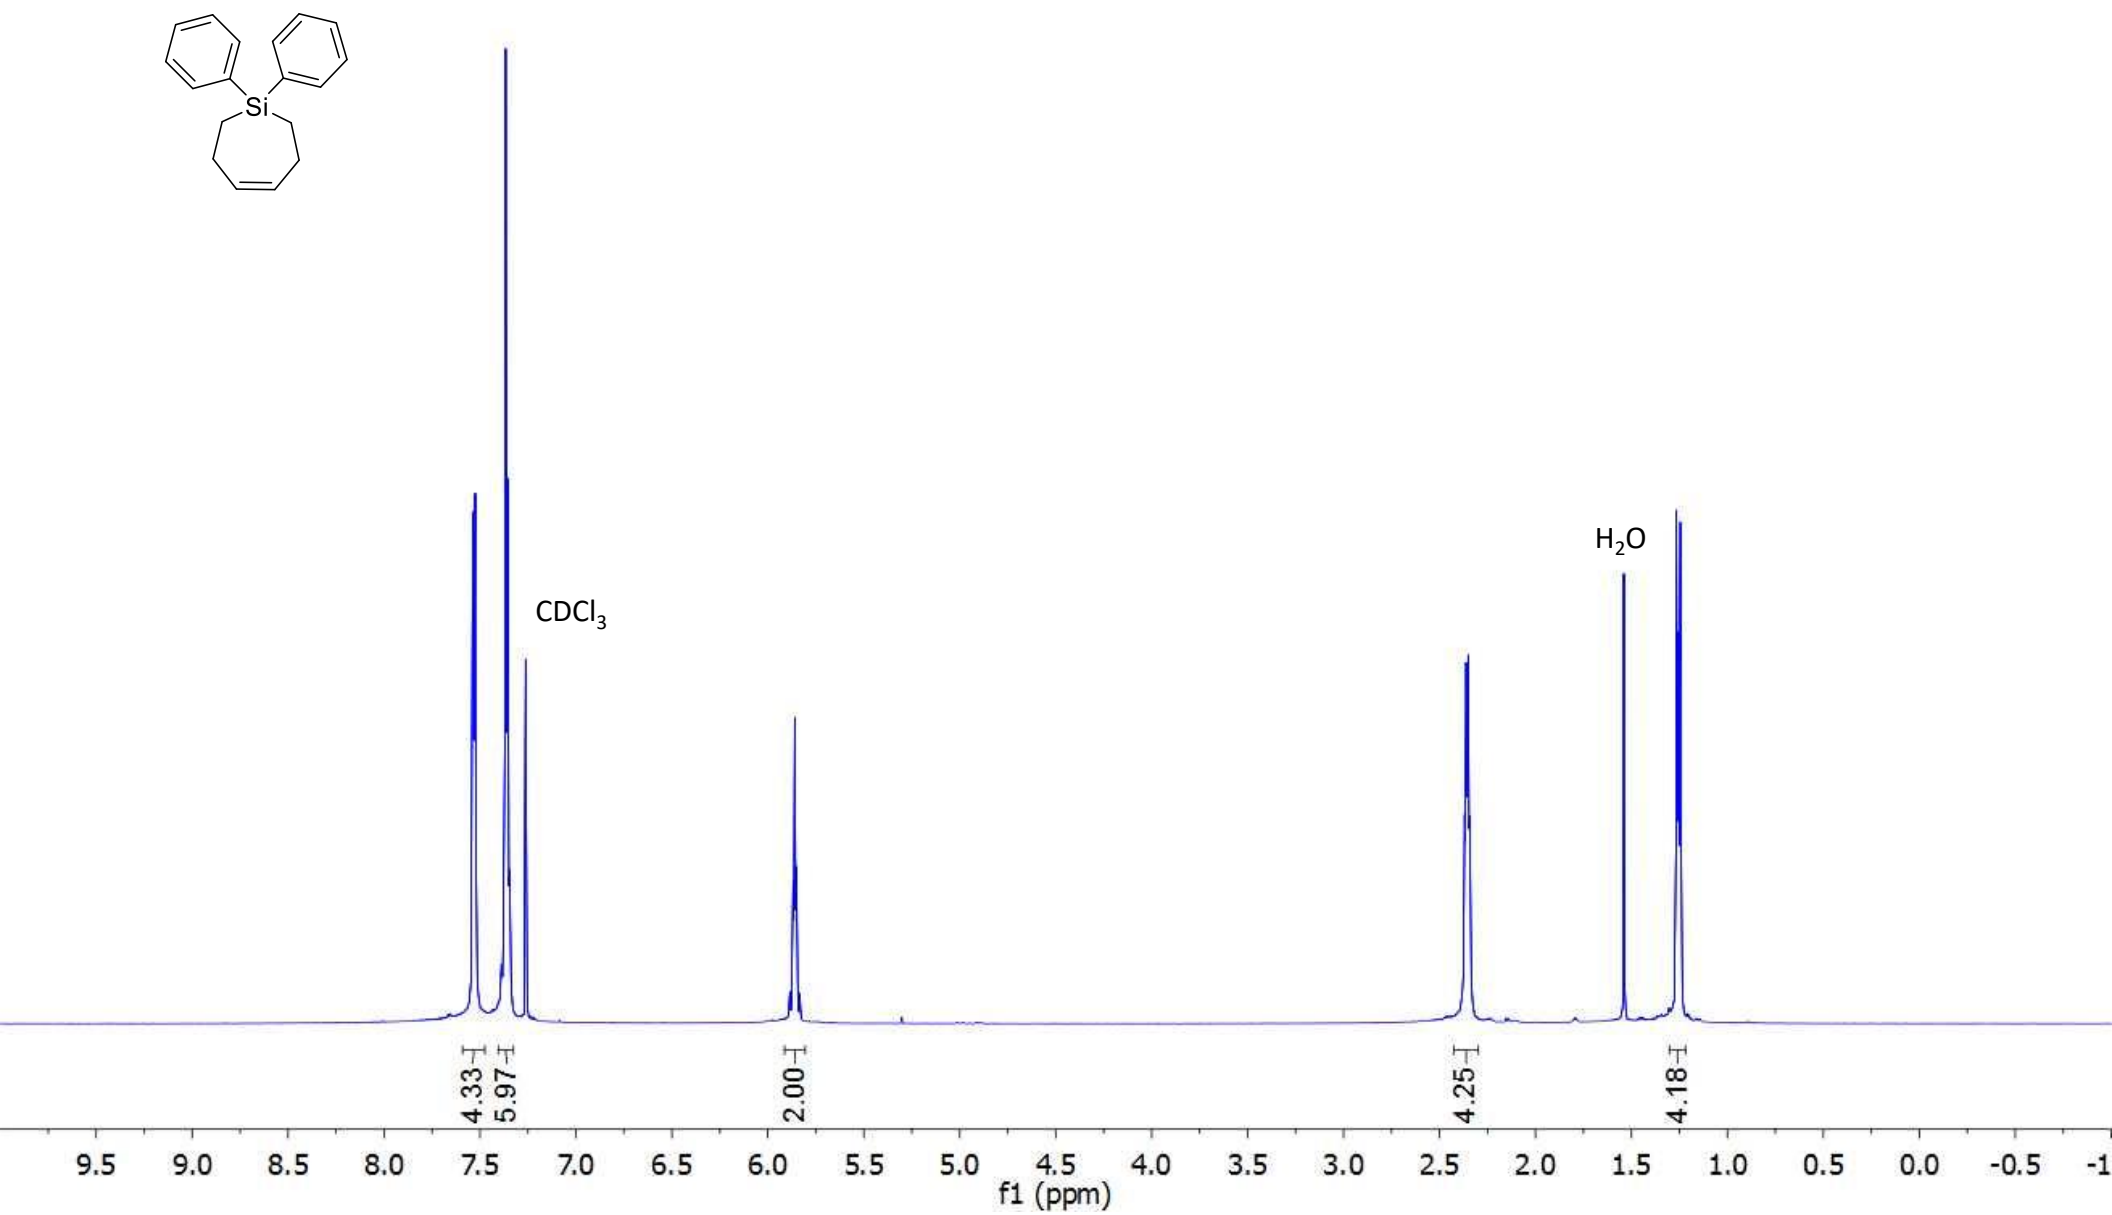

$^{13}\text{C}$  NMR (100 MHz,  $\text{CDCl}_3$ )

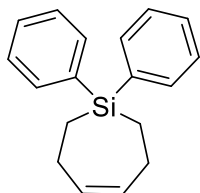

137.16  
134.70  
132.72  
129.29  
128.03

$\text{CDCl}_3$

-21.12

-11.39

190 180 170 160 150 140 130 120 110 100 90 80 70 60 50 40 30 20 10 0 -10  
f1 (ppm)

$^1\text{H}$  NMR (400 MHz,  $\text{CDCl}_3$ )

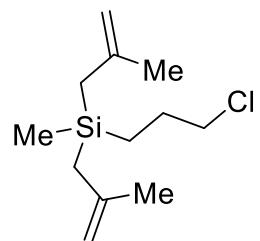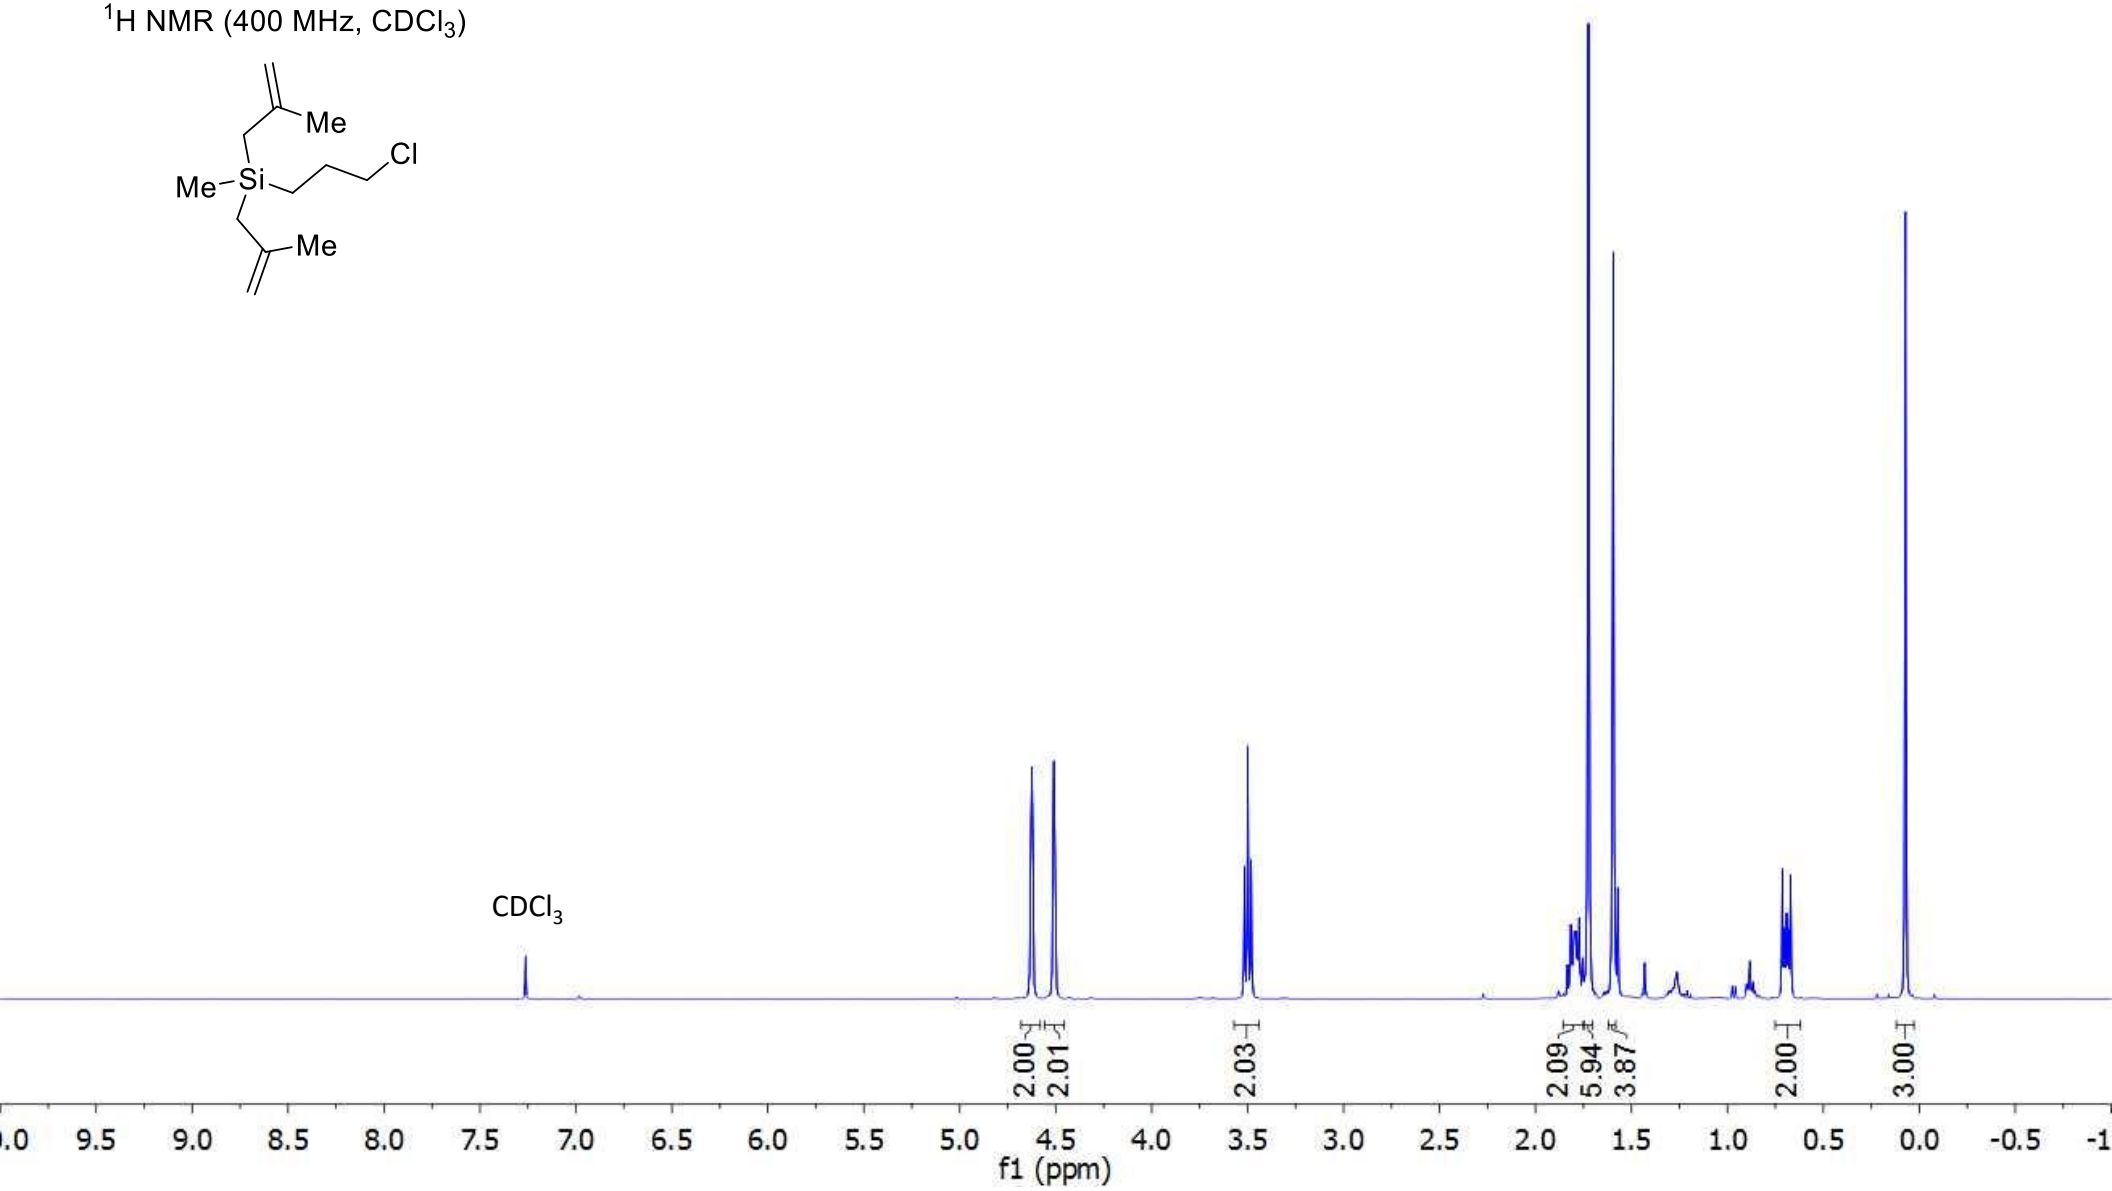

$^{13}\text{C}$  NMR (100 MHz,  $\text{CDCl}_3$ )

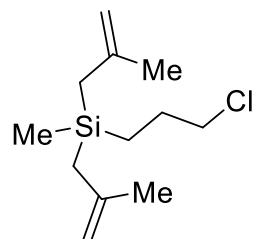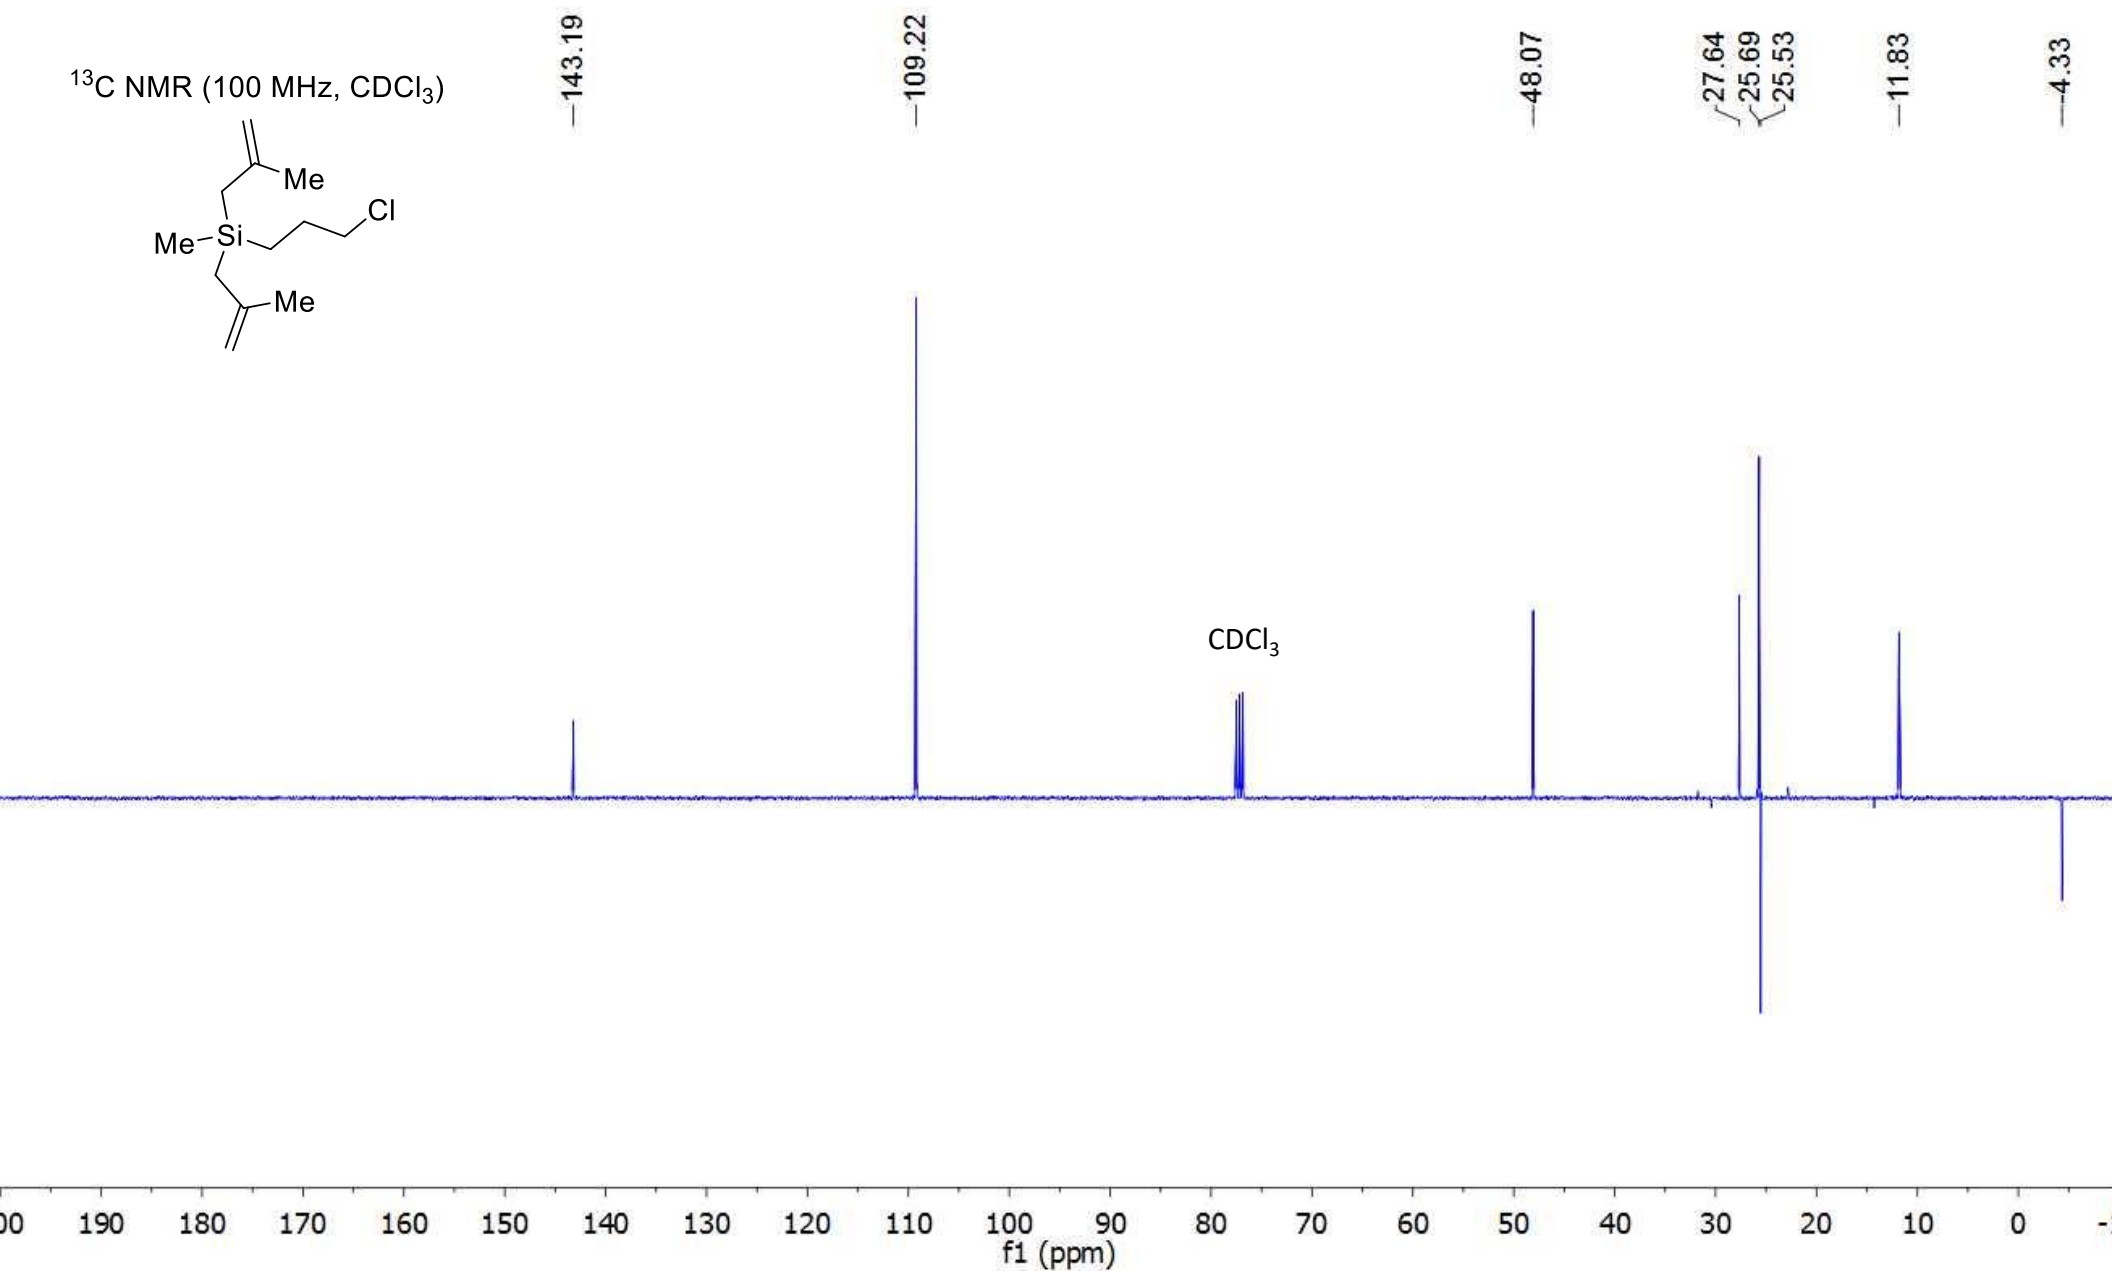

$^1\text{H}$  NMR (600 MHz,  $\text{CDCl}_3$ )

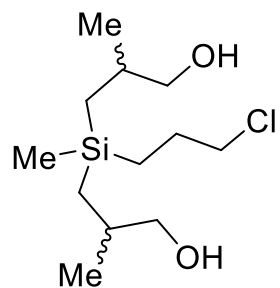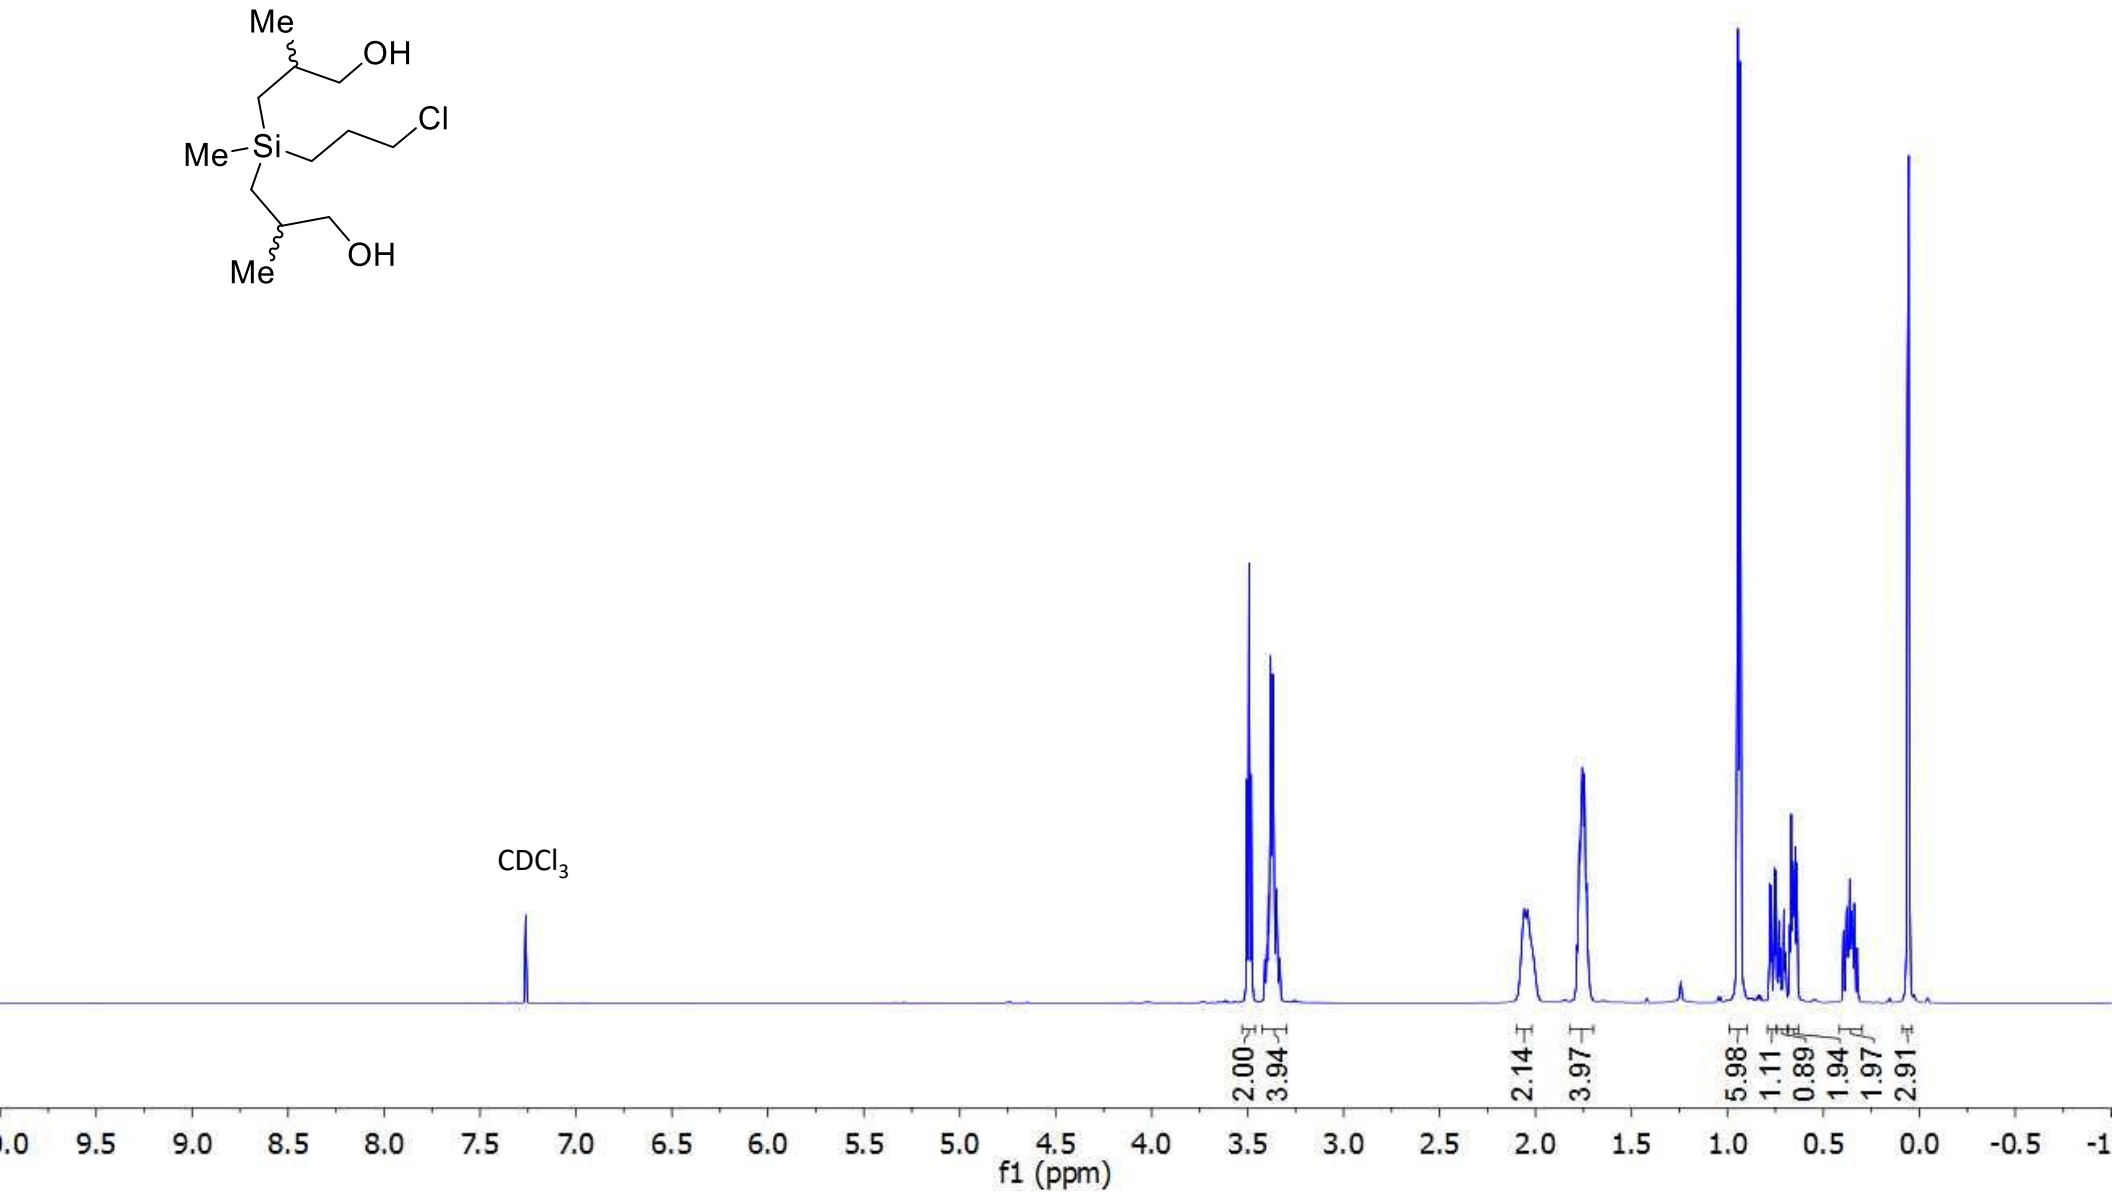

$^{13}\text{C}$  NMR (150 MHz,  $\text{CDCl}_3$ )

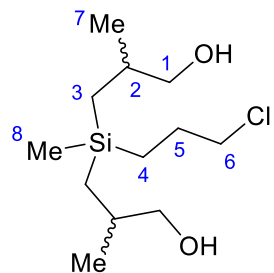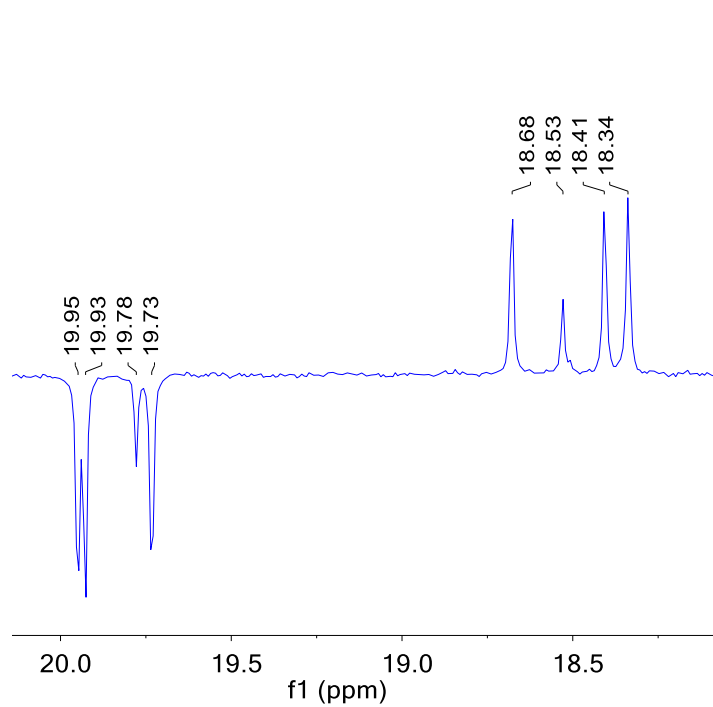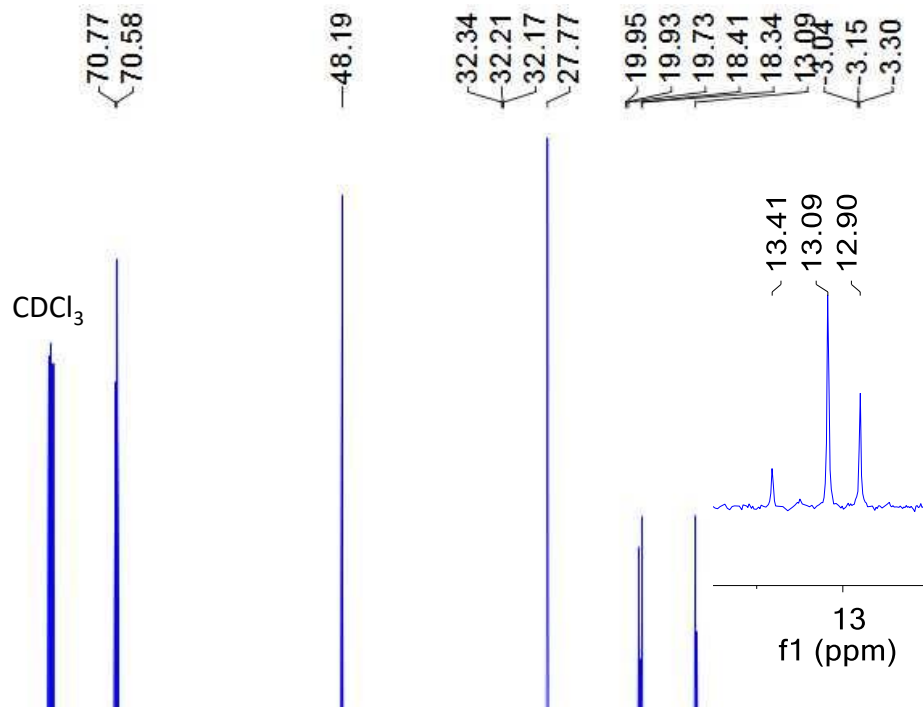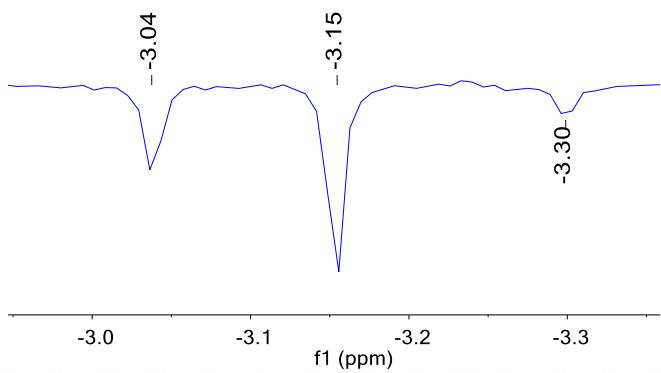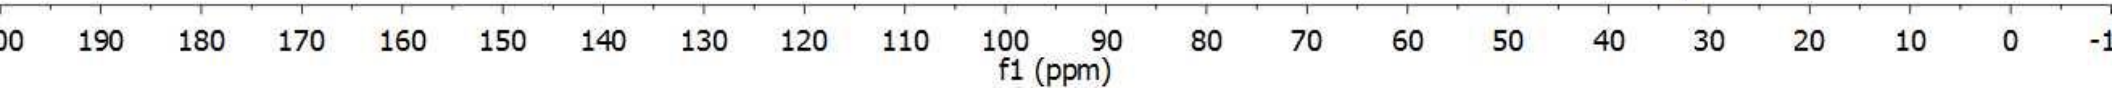

$^1\text{H}$  NMR (600 MHz,  $\text{CDCl}_3$ )

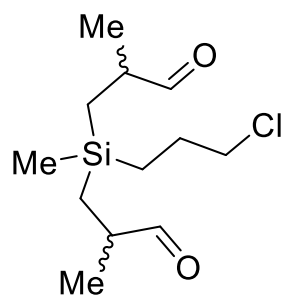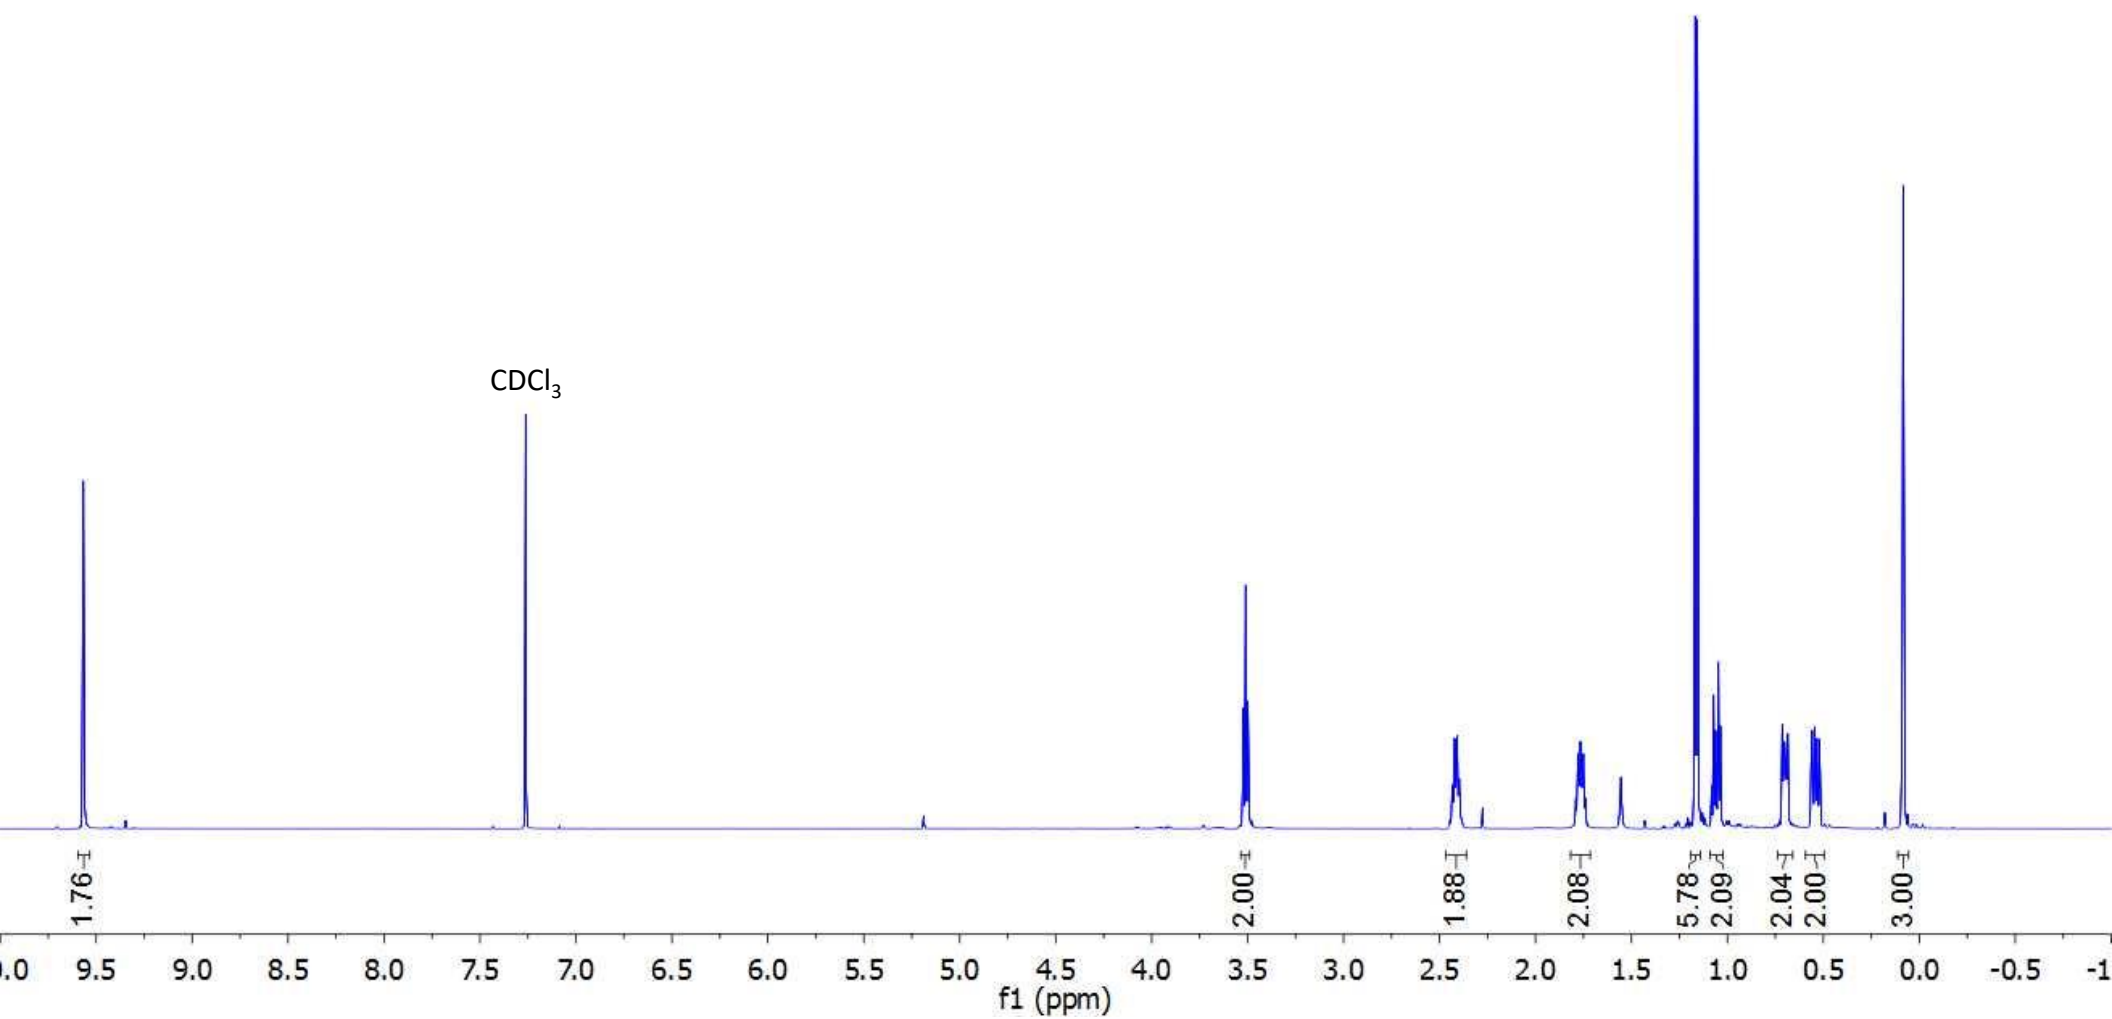

$^{13}\text{C}$  NMR (150 MHz,  $\text{CDCl}_3$ )

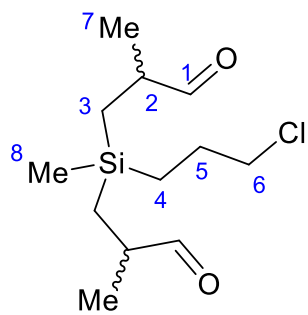

—204.36

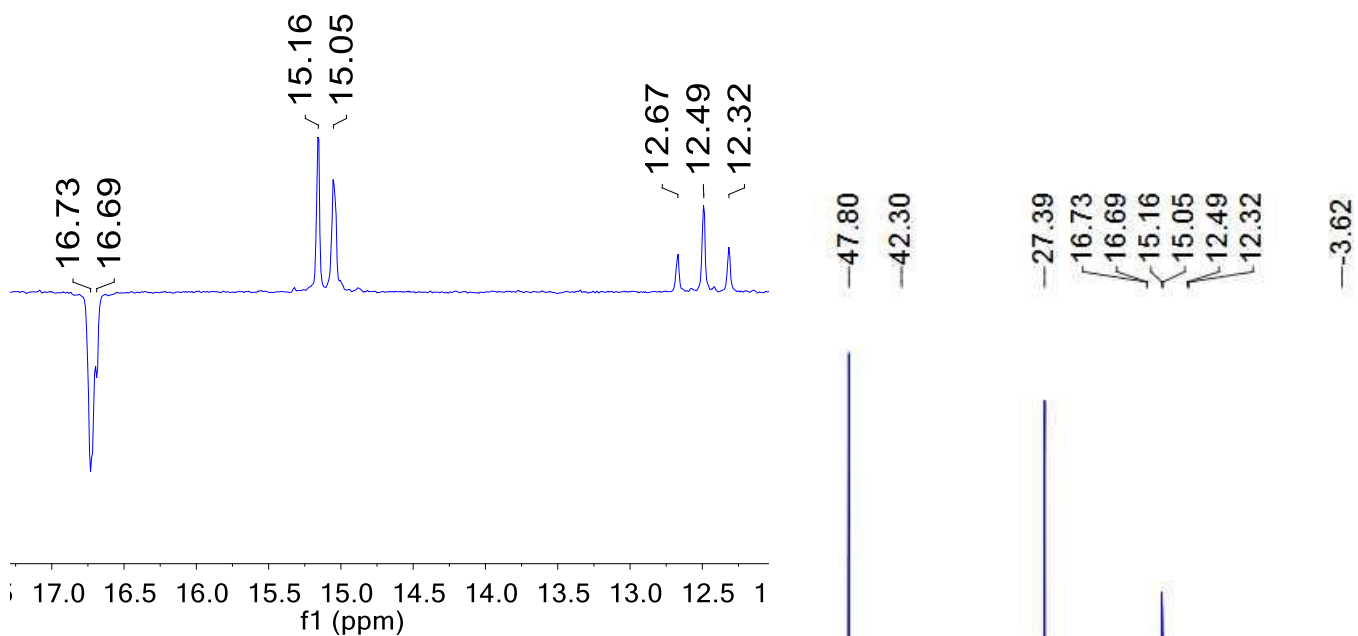

$\text{CDCl}_3$

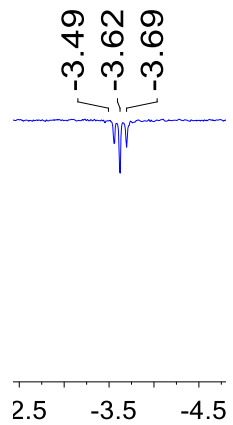

0 200 190 180 170 160 150 140 130 120 110 100 90 80 70 60 50 40 30 20 10 0 -1

f1 (ppm)



$^1\text{H}$  NMR (600 MHz,  $\text{CDCl}_3$ )

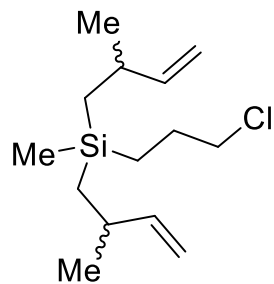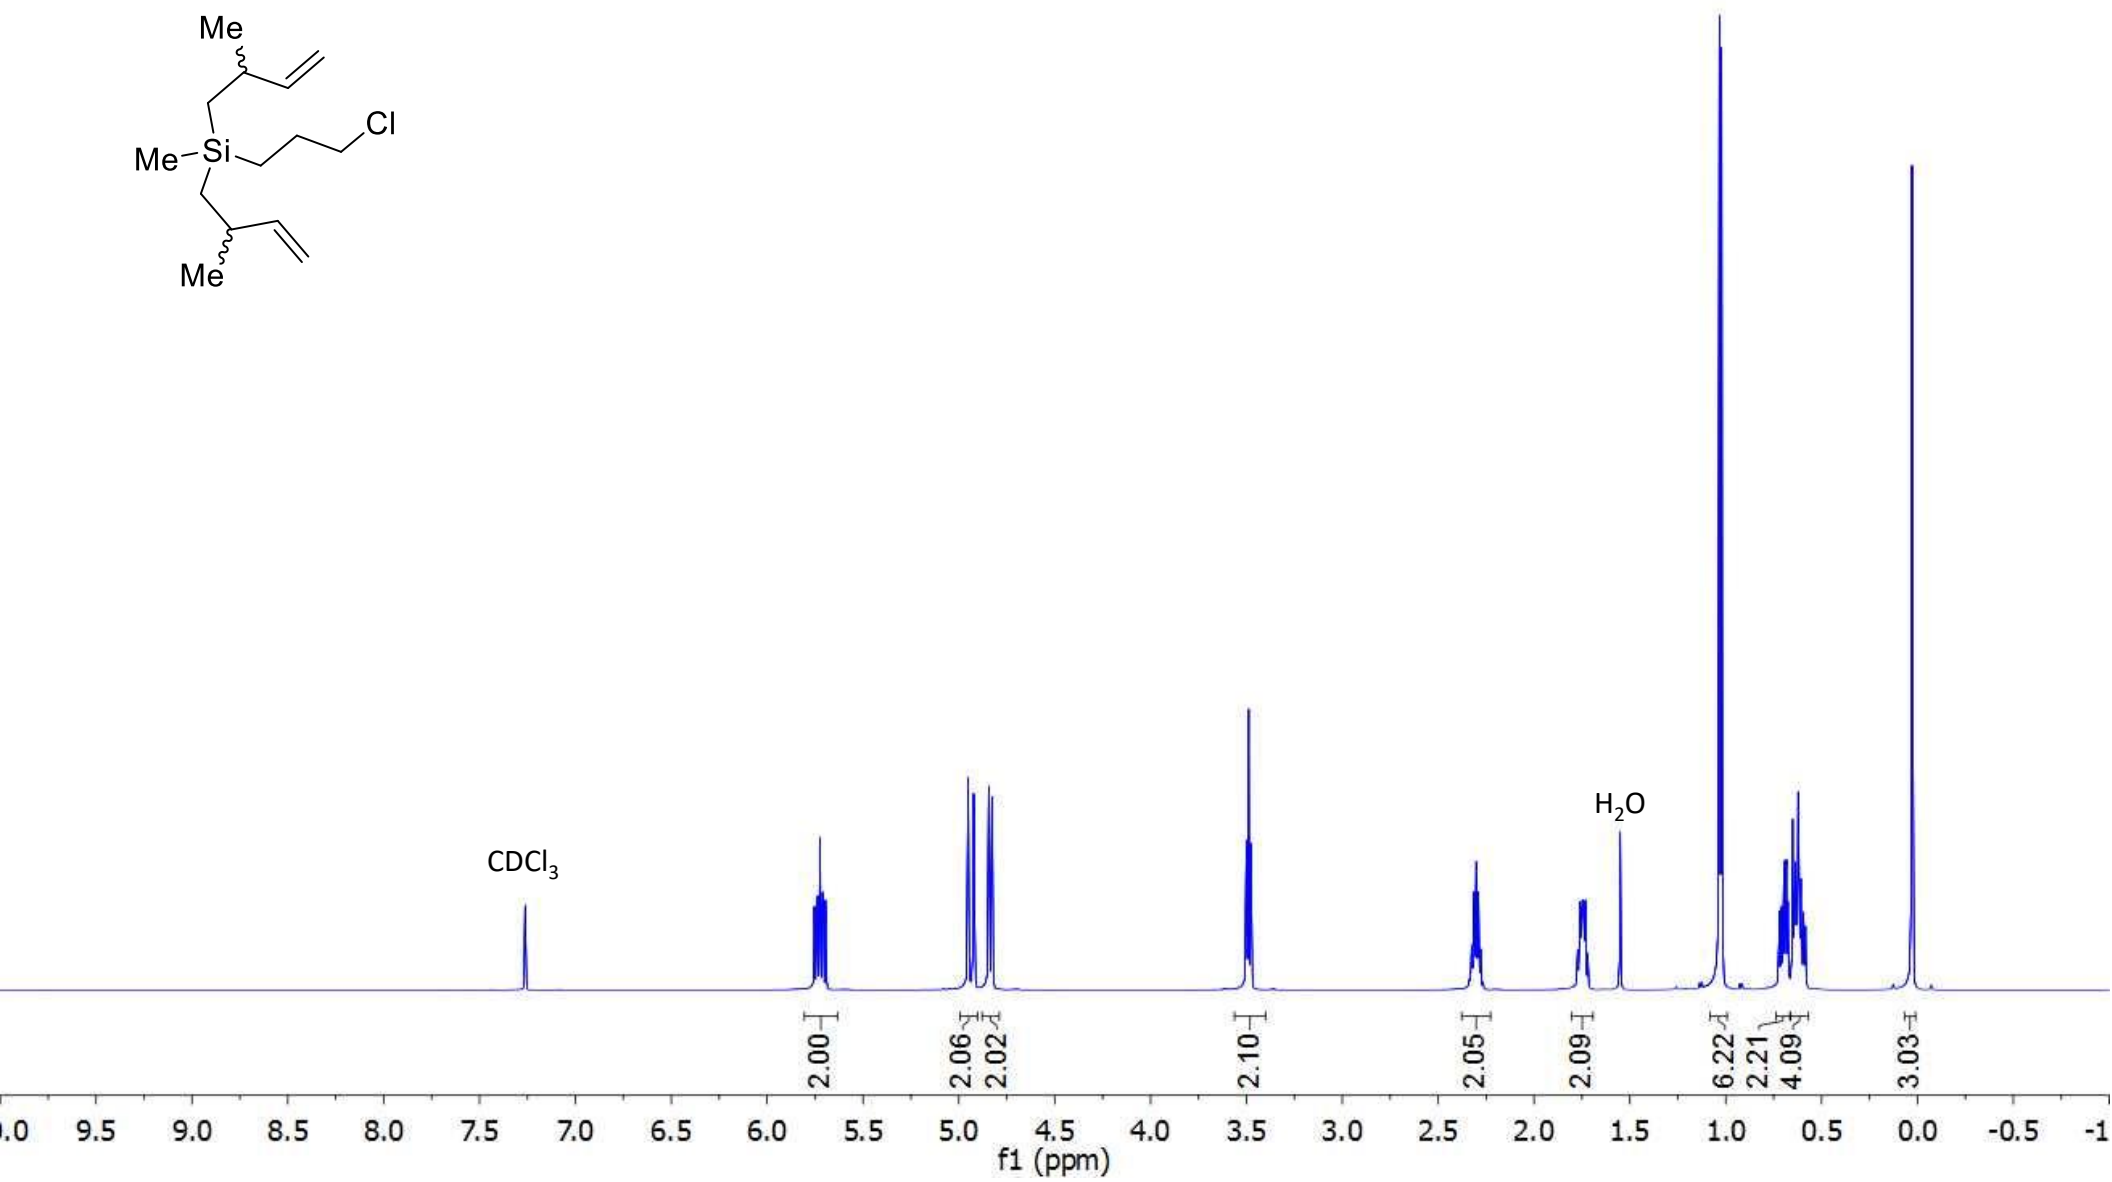

$^{13}\text{C}$  NMR (150 MHz,  $\text{CDCl}_3$ )

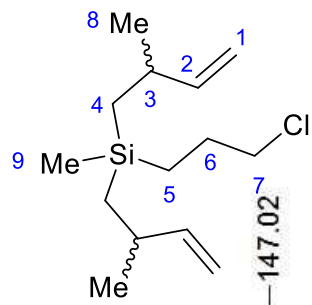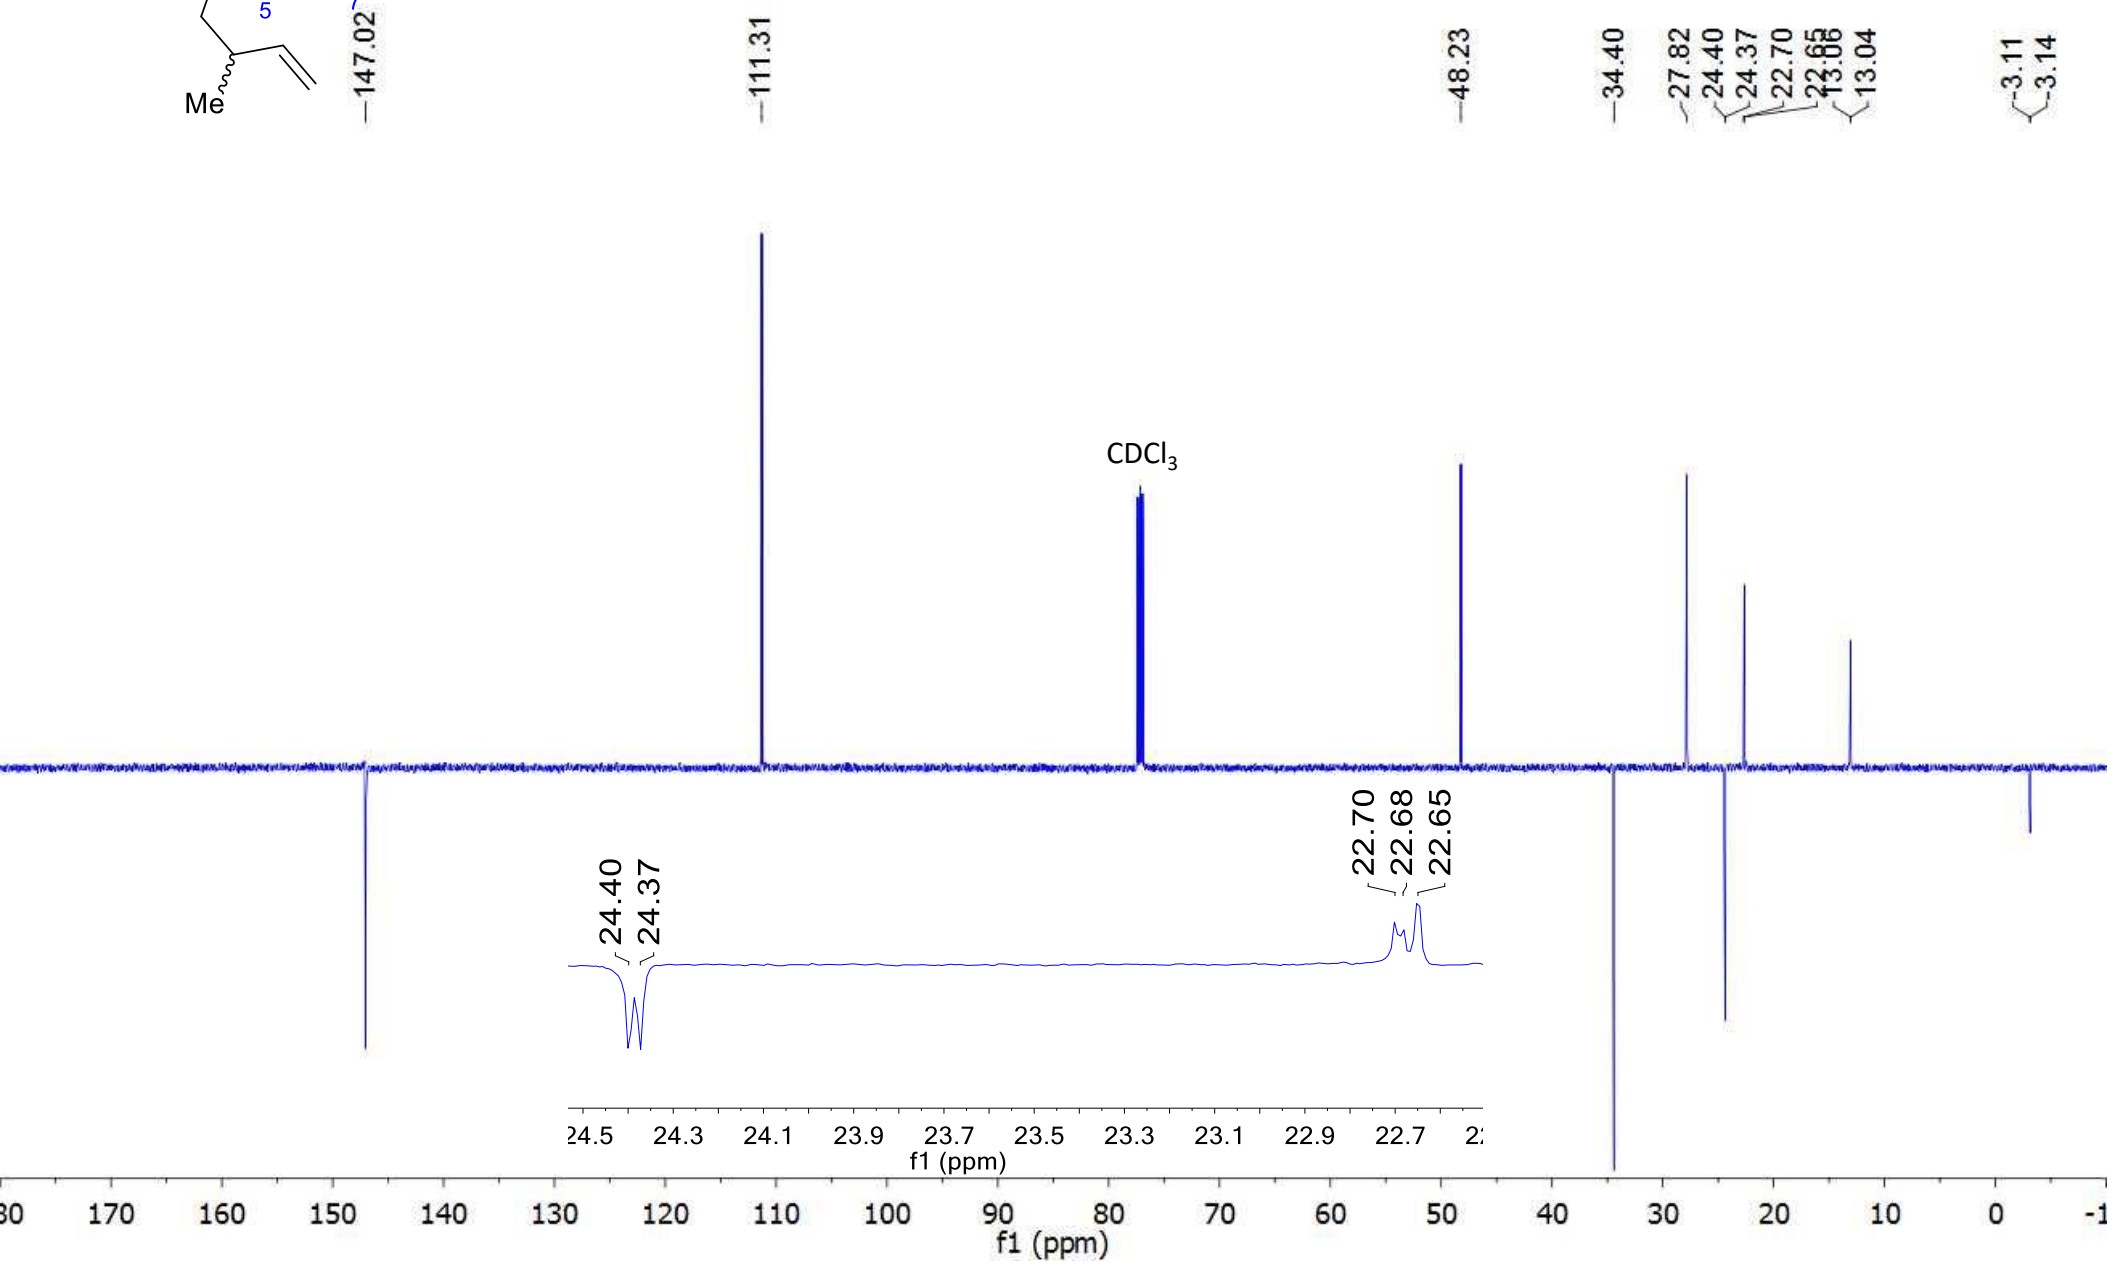

$^1\text{H}$  NMR (600 MHz,  $\text{CDCl}_3$ )

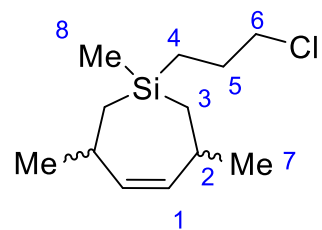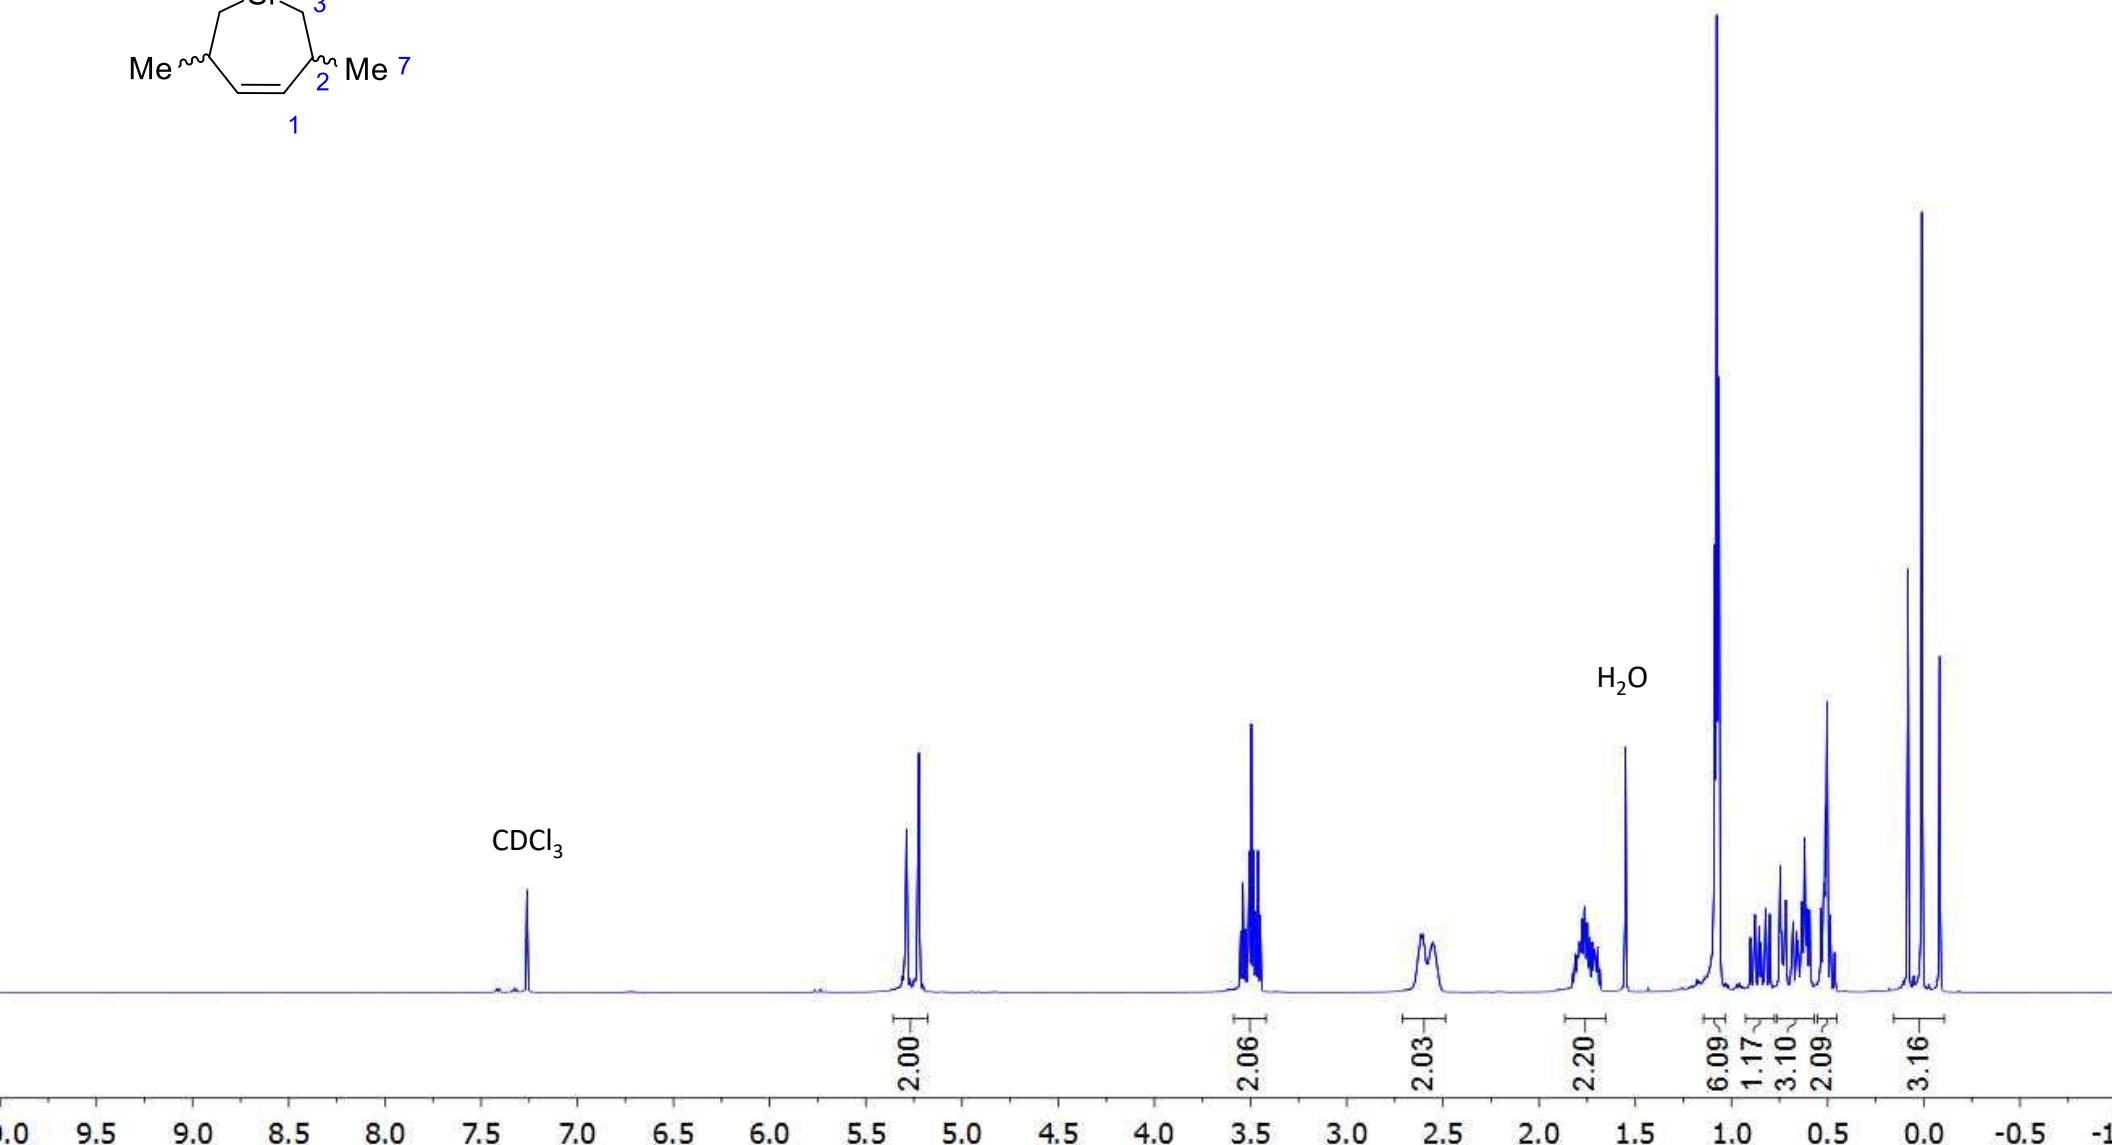

$^{13}\text{C}$  NMR (150 MHz,  $\text{CDCl}_3$ )

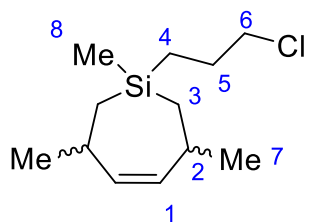

137.84  
137.69  
135.56  
135.50

$\text{CDCl}_3$

48.27  
48.20  
48.12

30.59  
27.91  
27.54  
26.93  
26.89  
26.48  
23.70  
13.15  
11.79

2.51  
3.35  
4.14

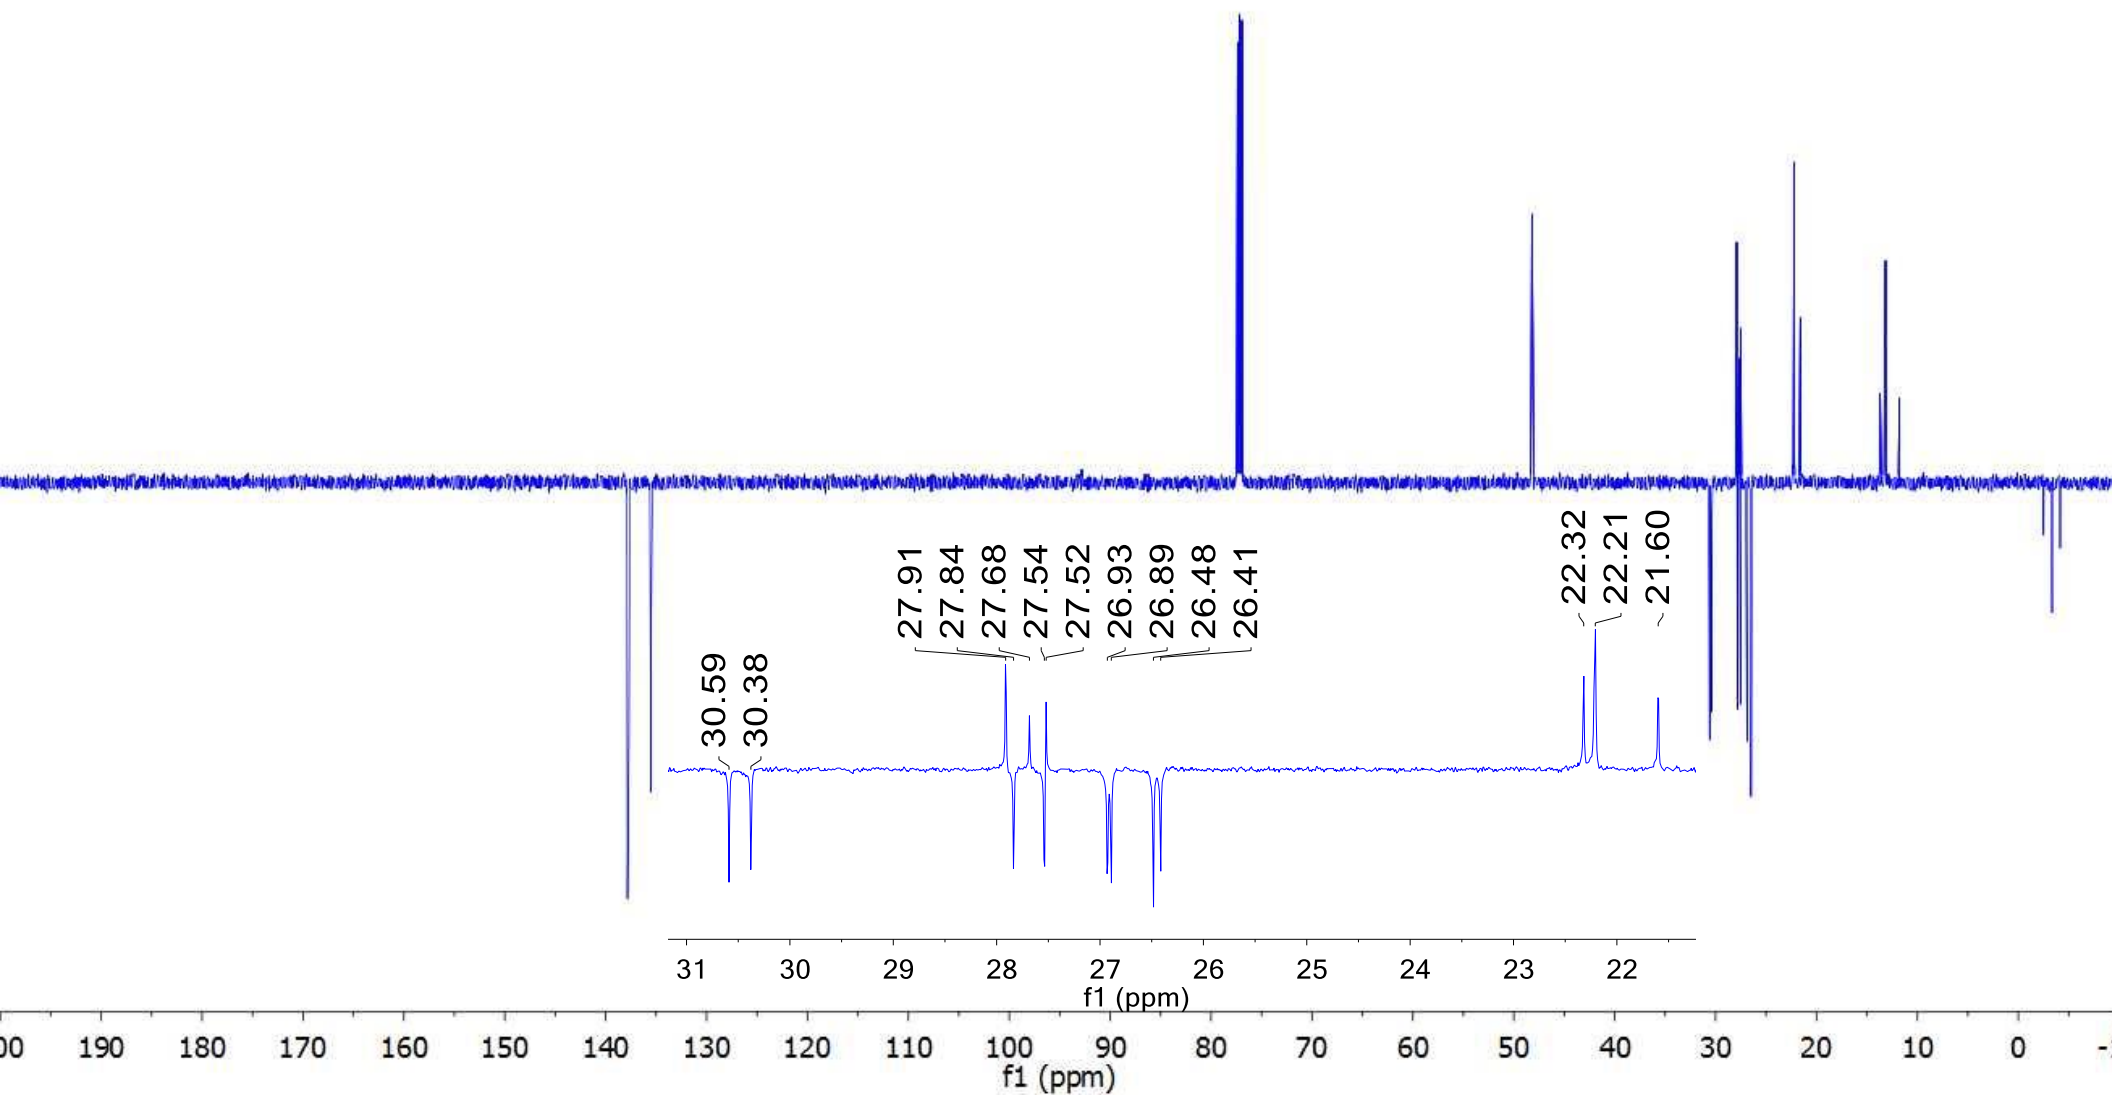

$^1\text{H}$  NMR (600 MHz,  $\text{CDCl}_3$ )

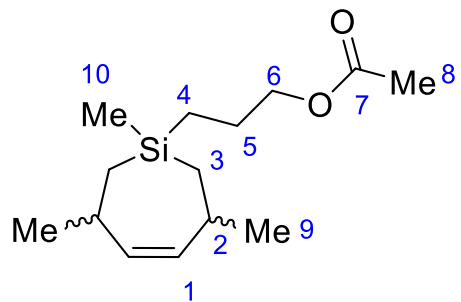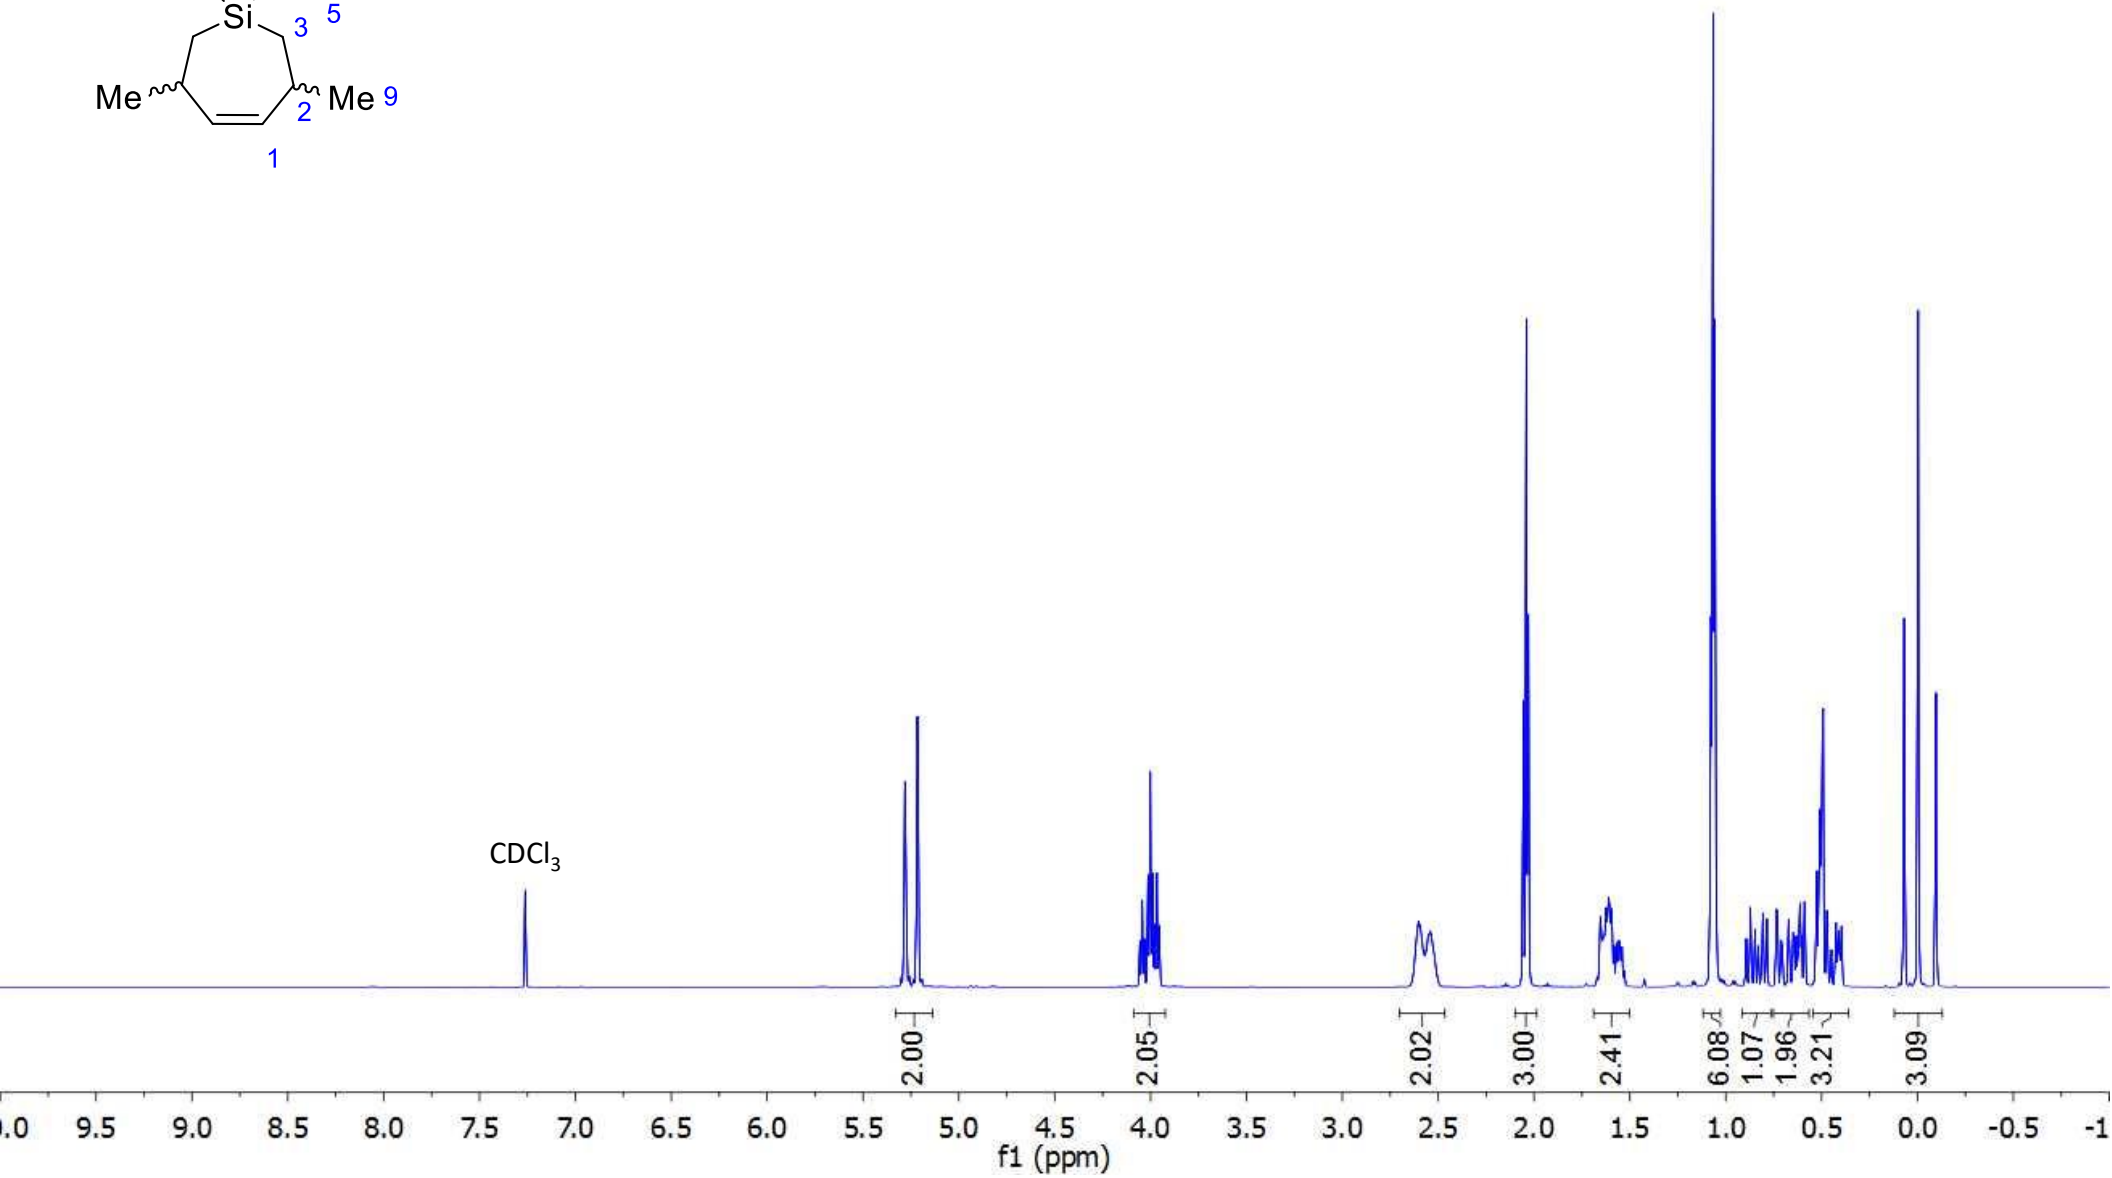

<sup>13</sup>C NMR (150 MHz, CDCl<sub>3</sub>)

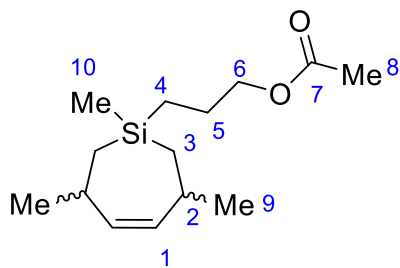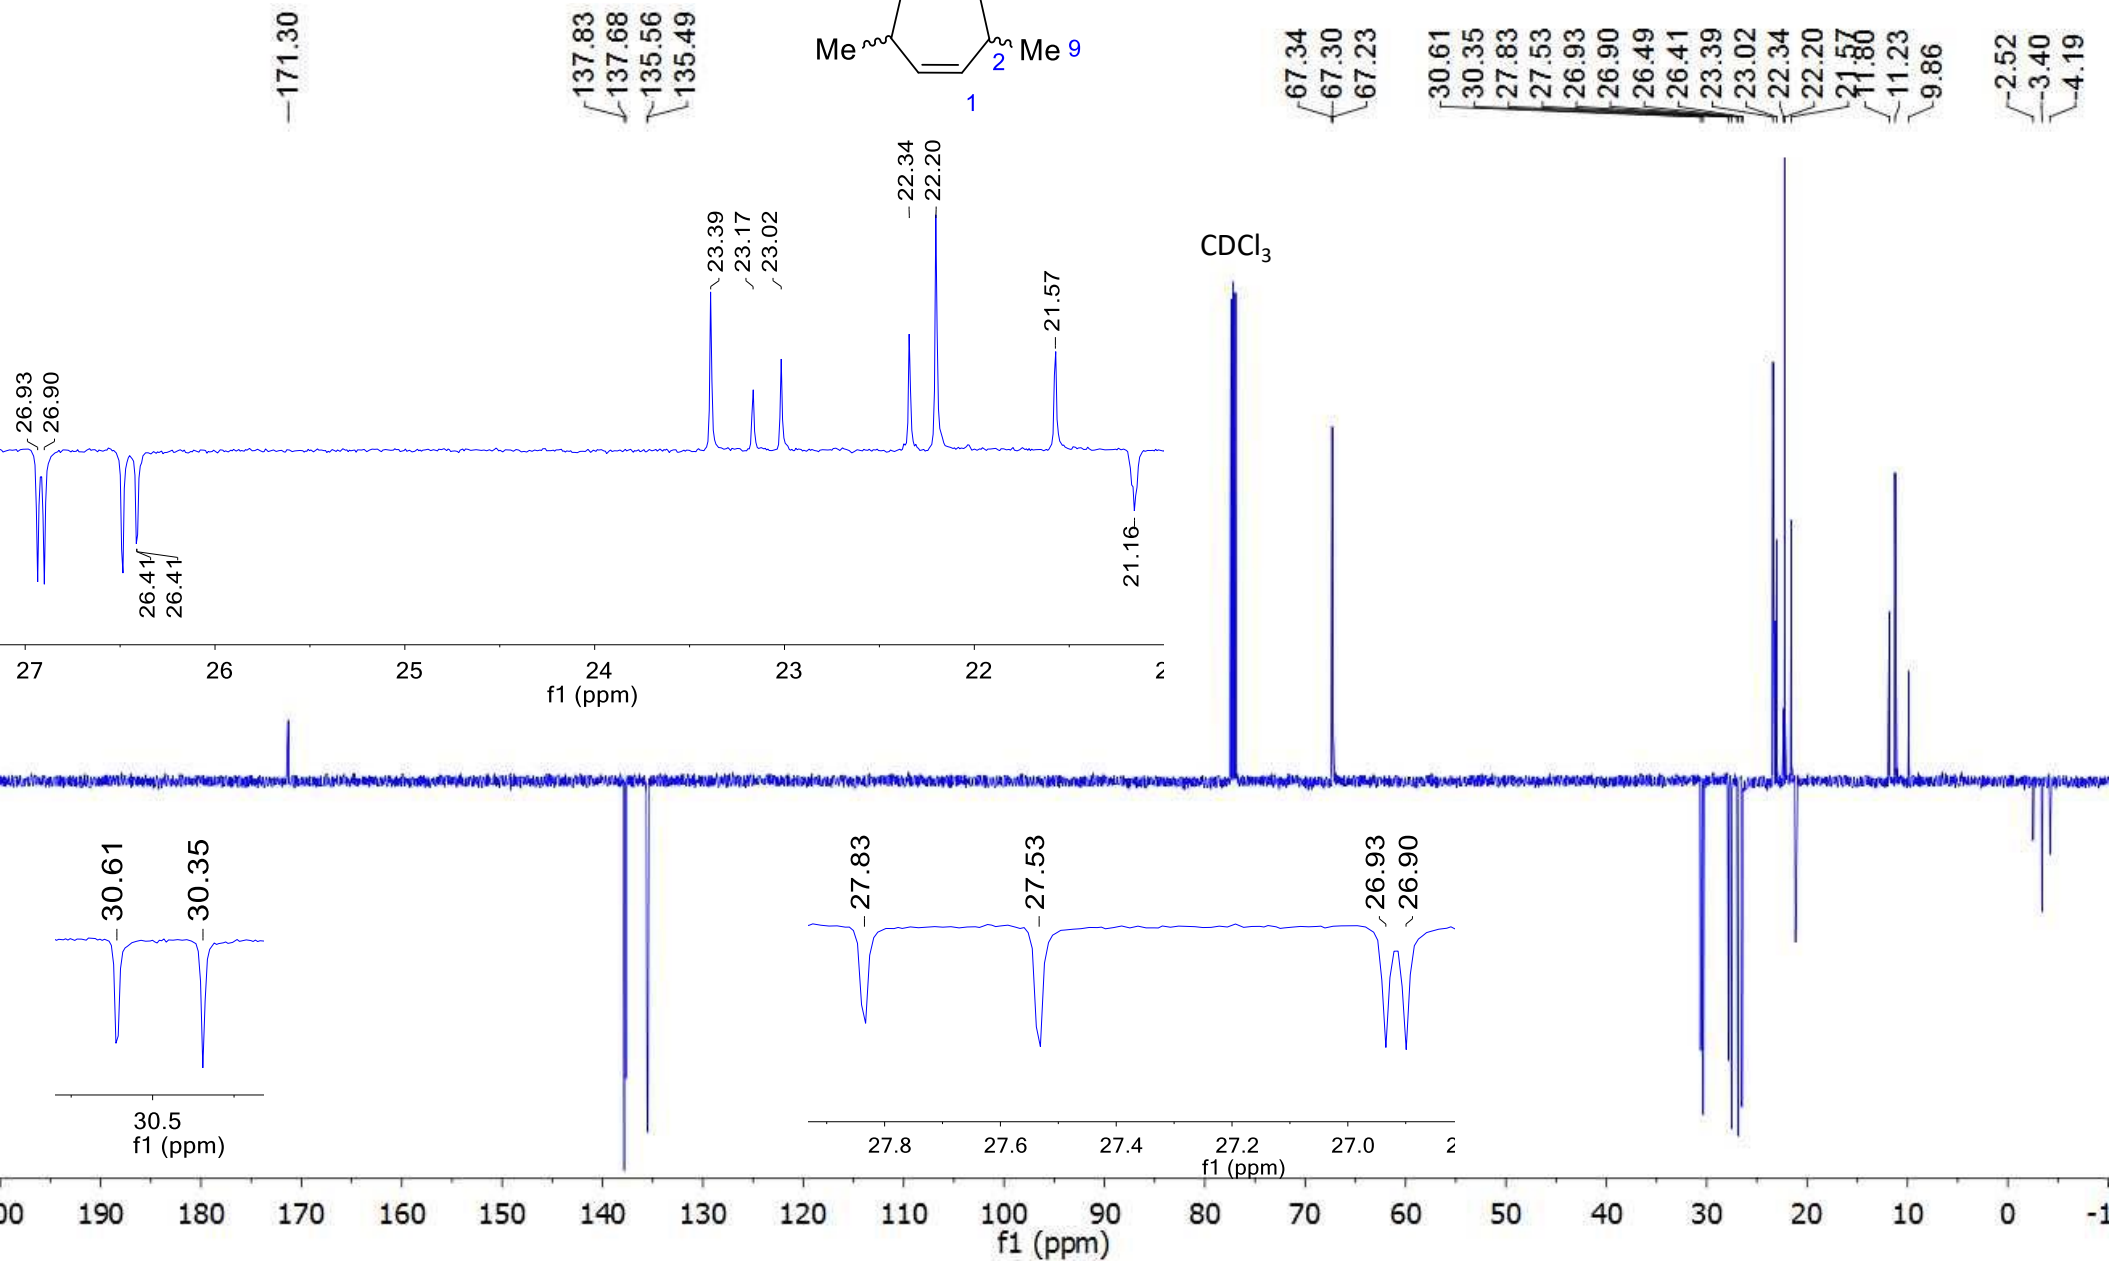

$^1\text{H}$  NMR (600 MHz,  $\text{CDCl}_3$ )

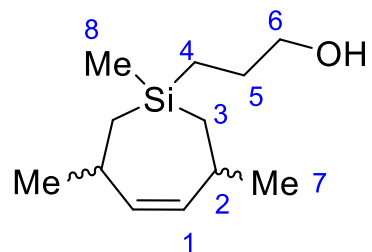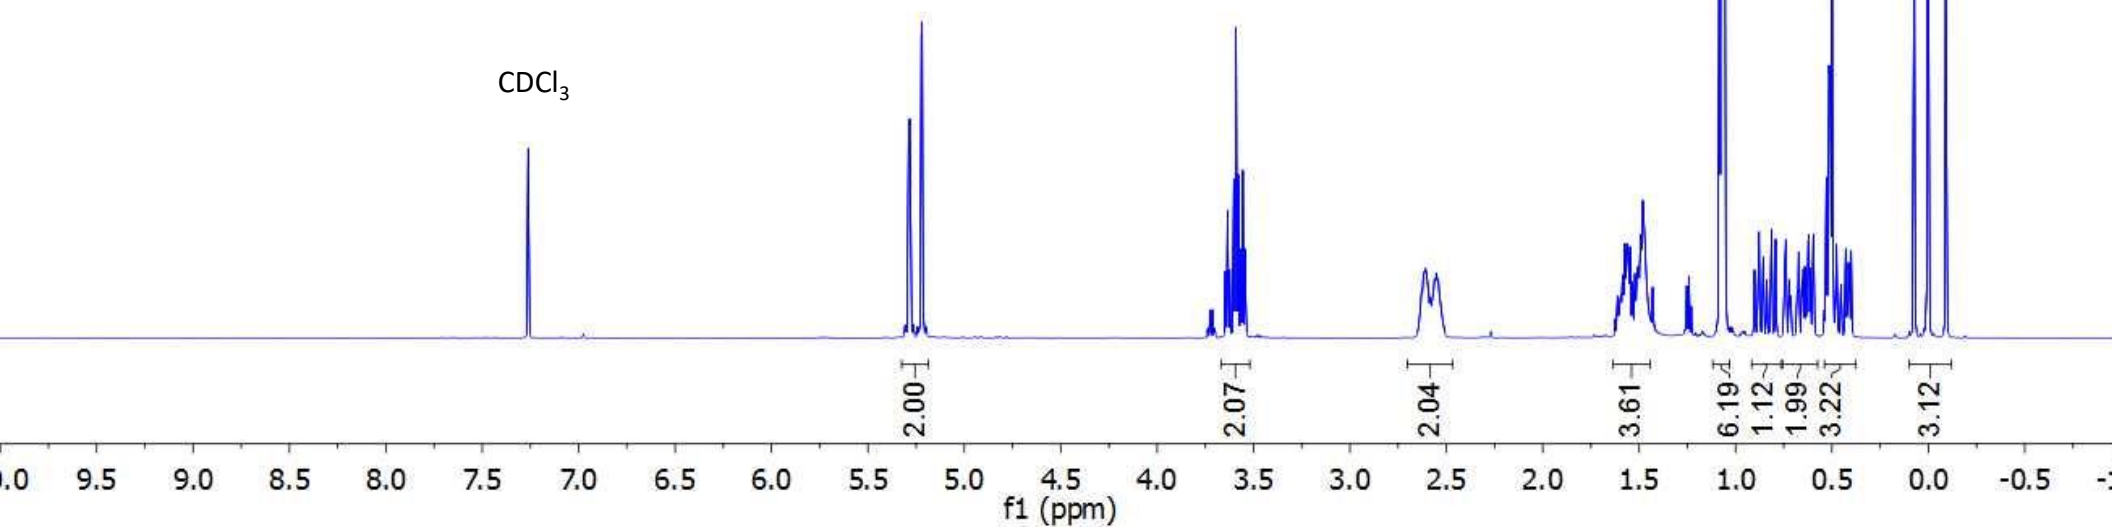

$^{13}\text{C}$  NMR (150 MHz,  $\text{CDCl}_3$ )

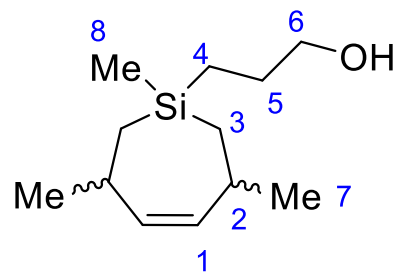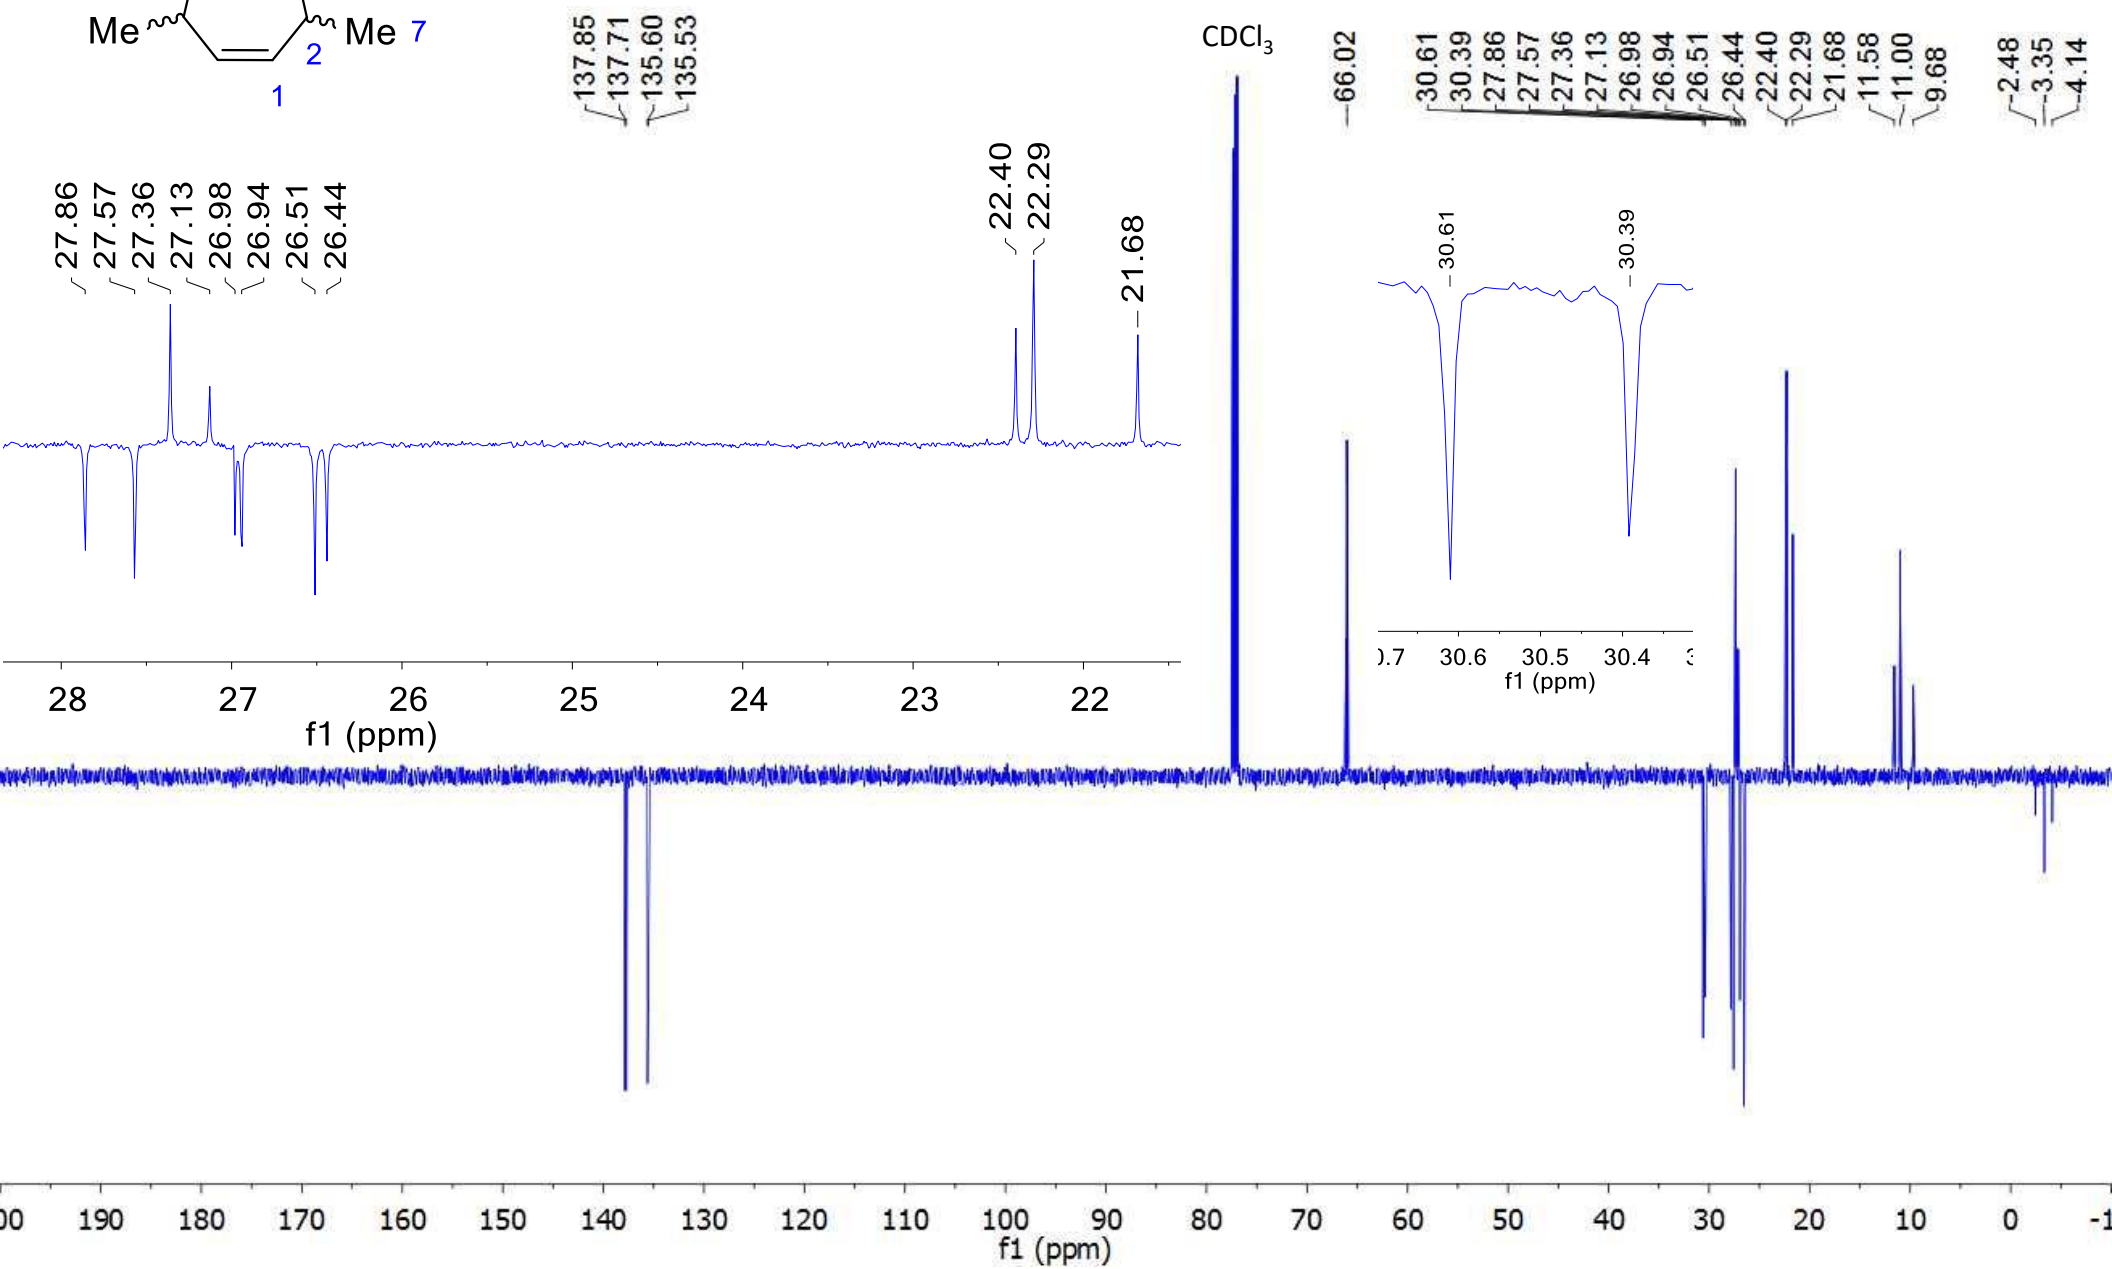



$^1\text{H}$  NMR (400 MHz,  $\text{CDCl}_3$ )

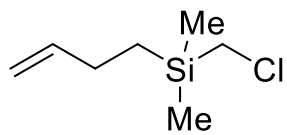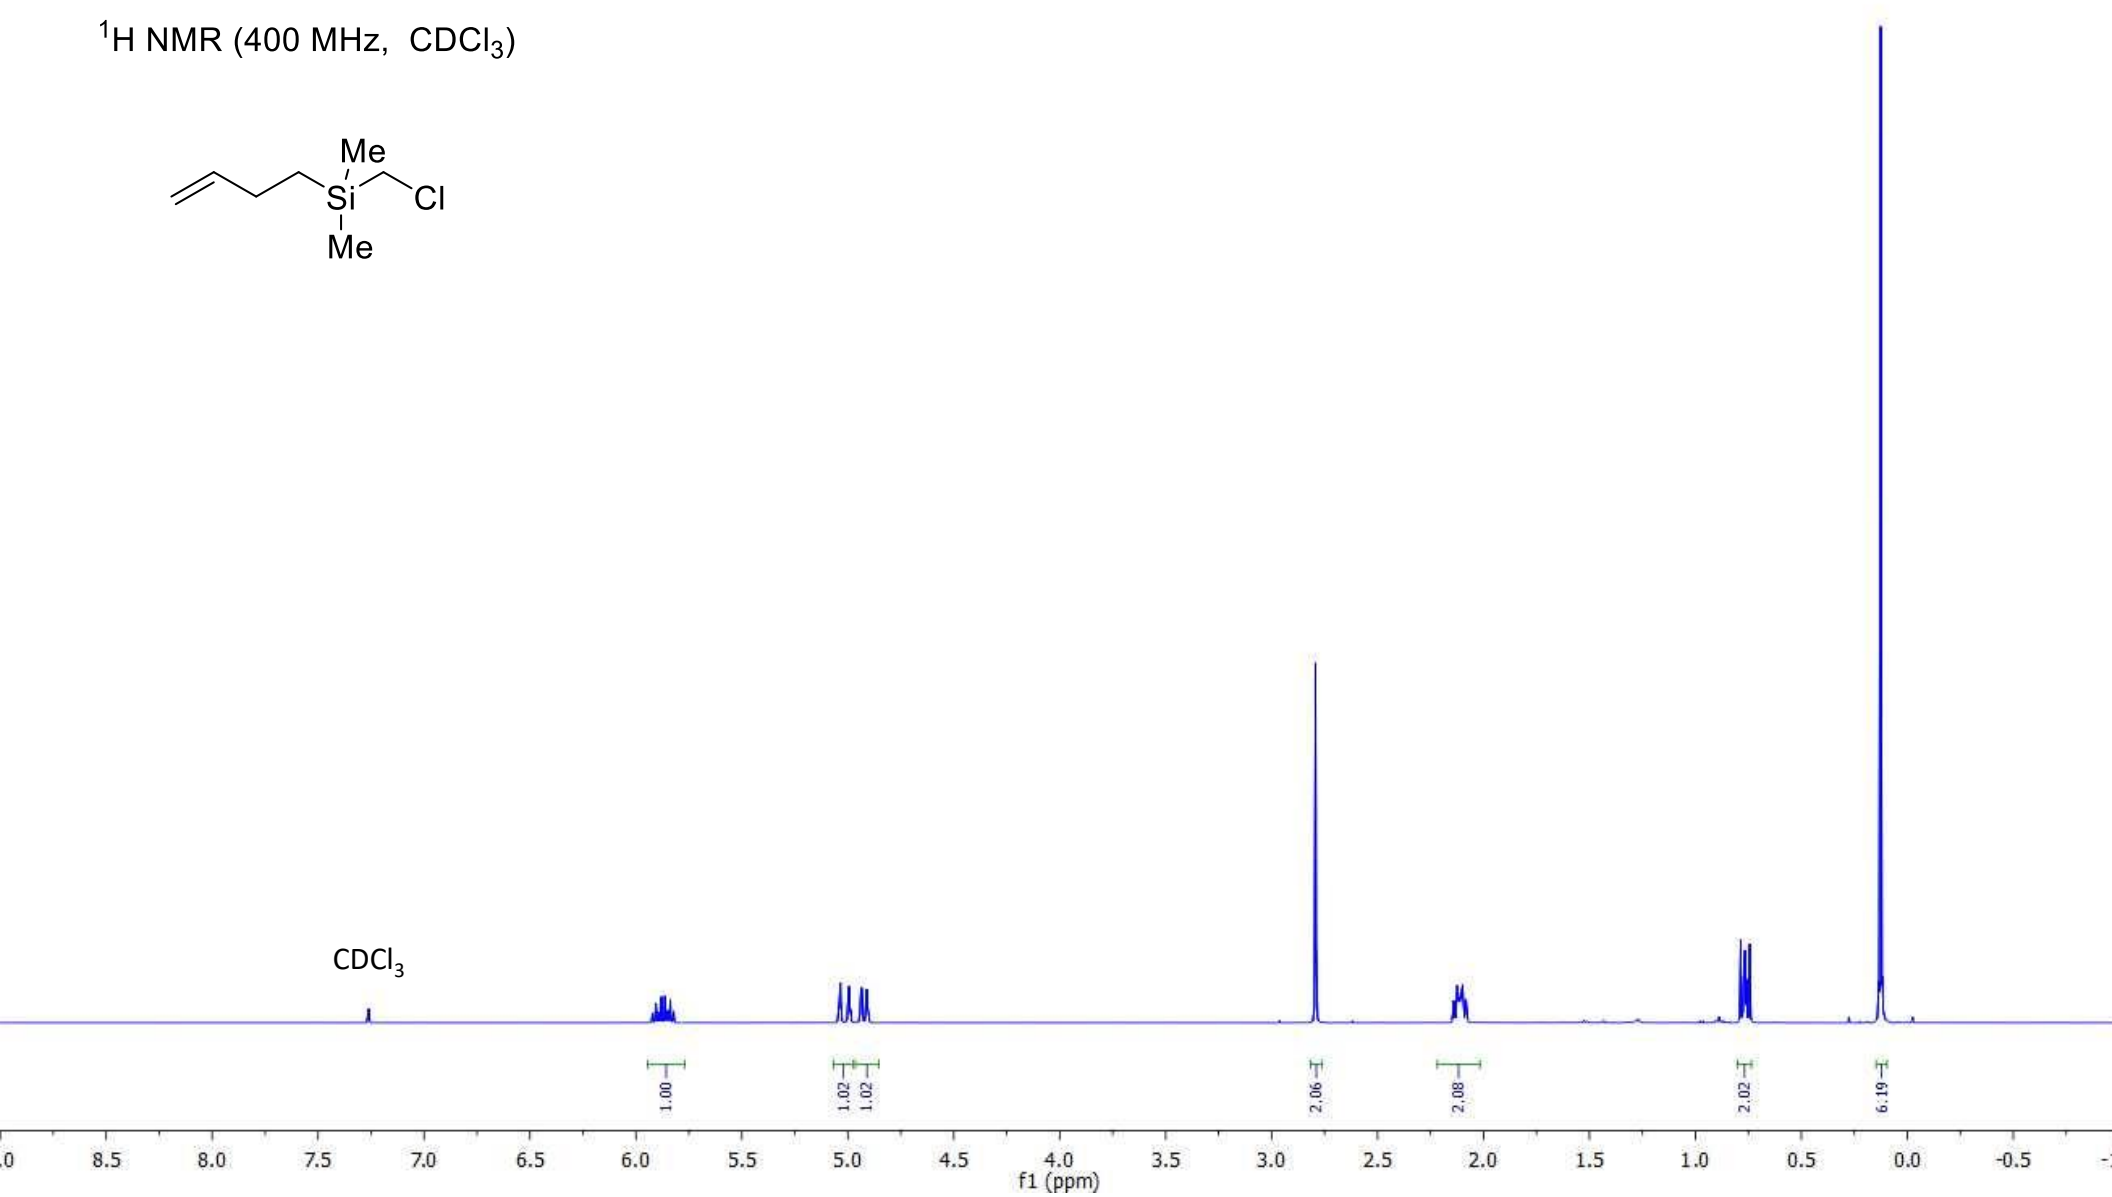

$^{13}\text{C}$  NMR (100 MHz,  $\text{CDCl}_3$ )

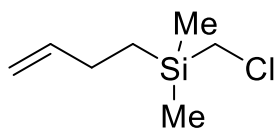

-141.10

-113.39

~30.45

~27.77

-12.93

-4.39

$\text{CDCl}_3$

190 180 170 160 150 140 130 120 110 100 90 80 70 60 50 40 30 20 10 0 -10  
f1 (ppm)

$^1\text{H}$  NMR (600 MHz,  $\text{CDCl}_3$ )

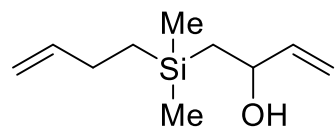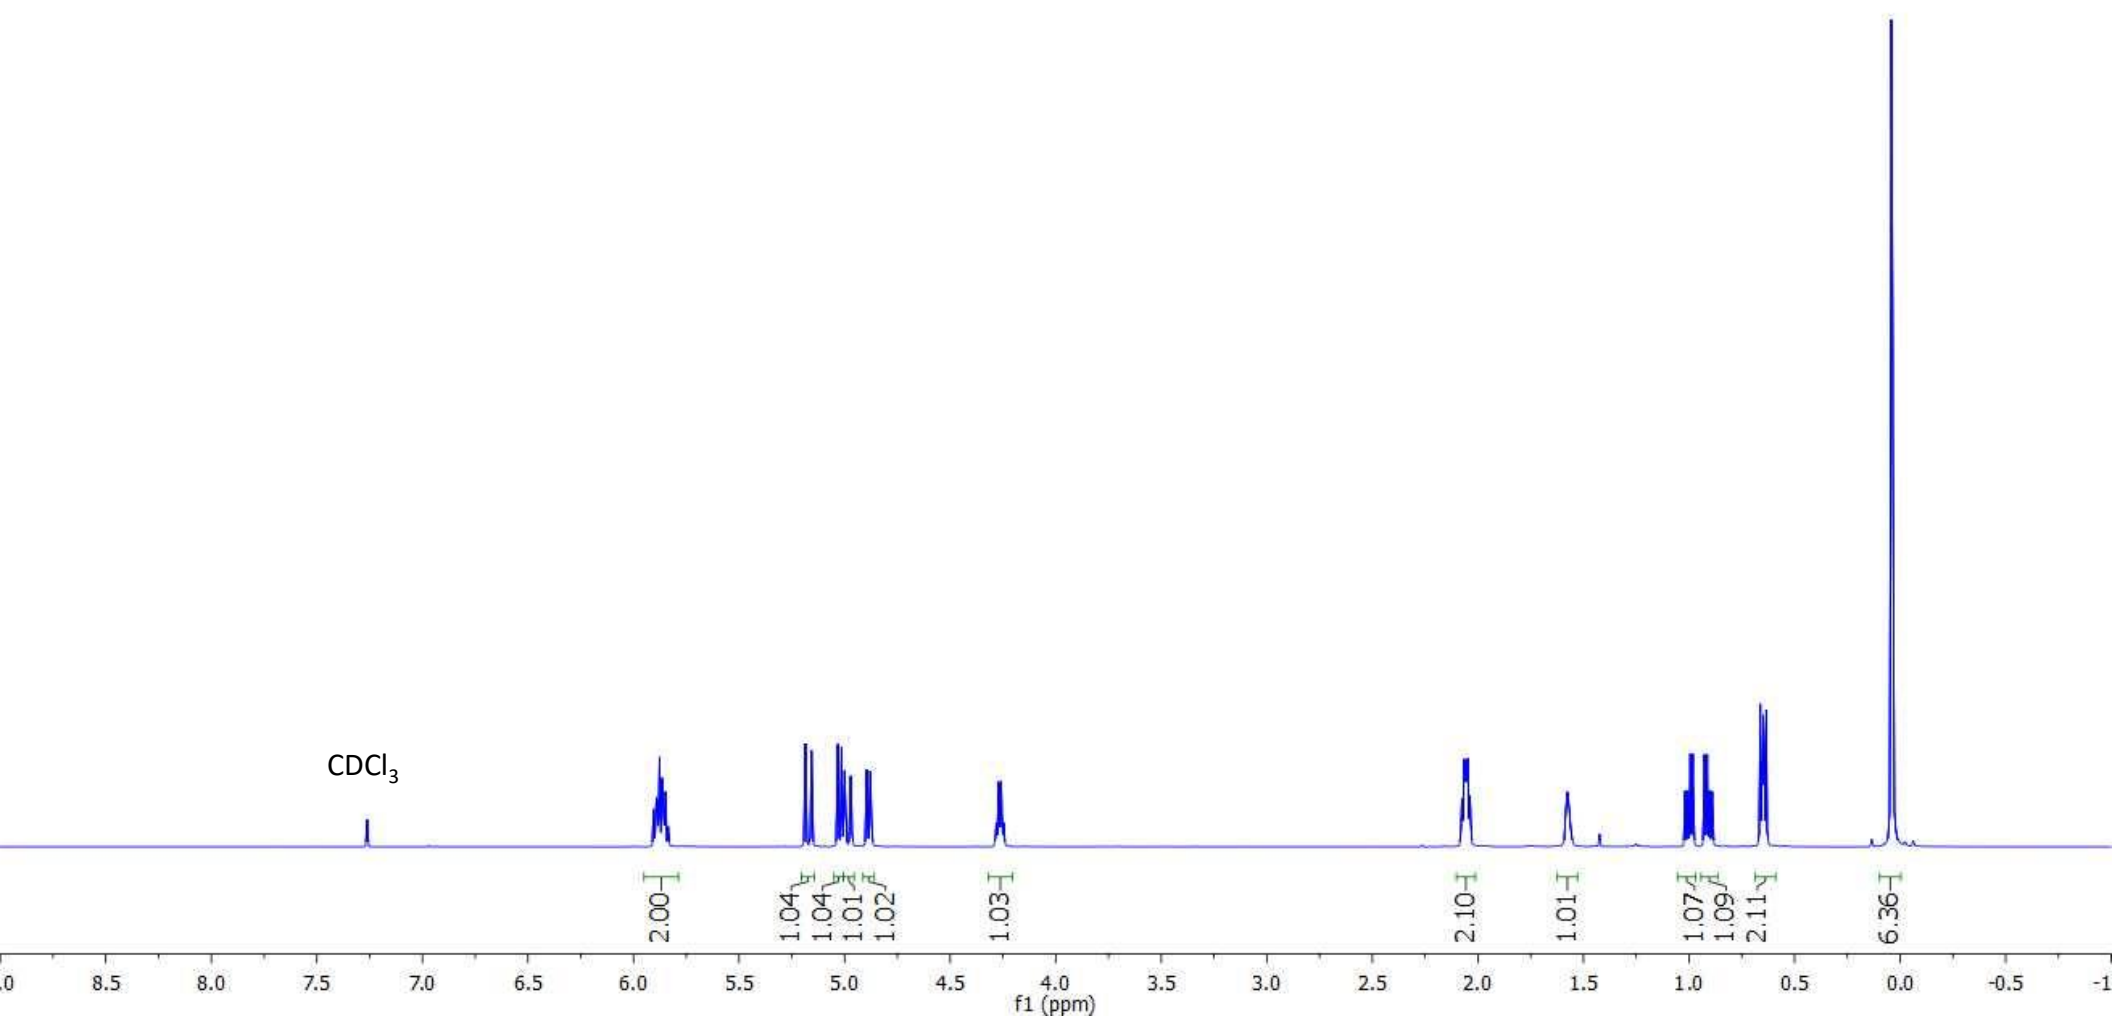

$^{13}\text{C}$  NMR (150 MHz,  $\text{CDCl}_3$ )

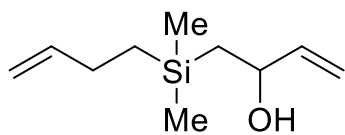

143.62  
141.73

113.65  
112.92

-71.56

-28.01  
-25.14

-15.13

-2.34  
-2.36

$\text{CDCl}_3$

190 180 170 160 150 140 130 120 110 100 90 80 70 60 50 40 30 20 10 0  
f1 (ppm)

$^1\text{H}$  NMR (400 MHz,  $\text{CDCl}_3$ )

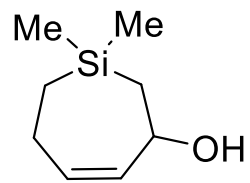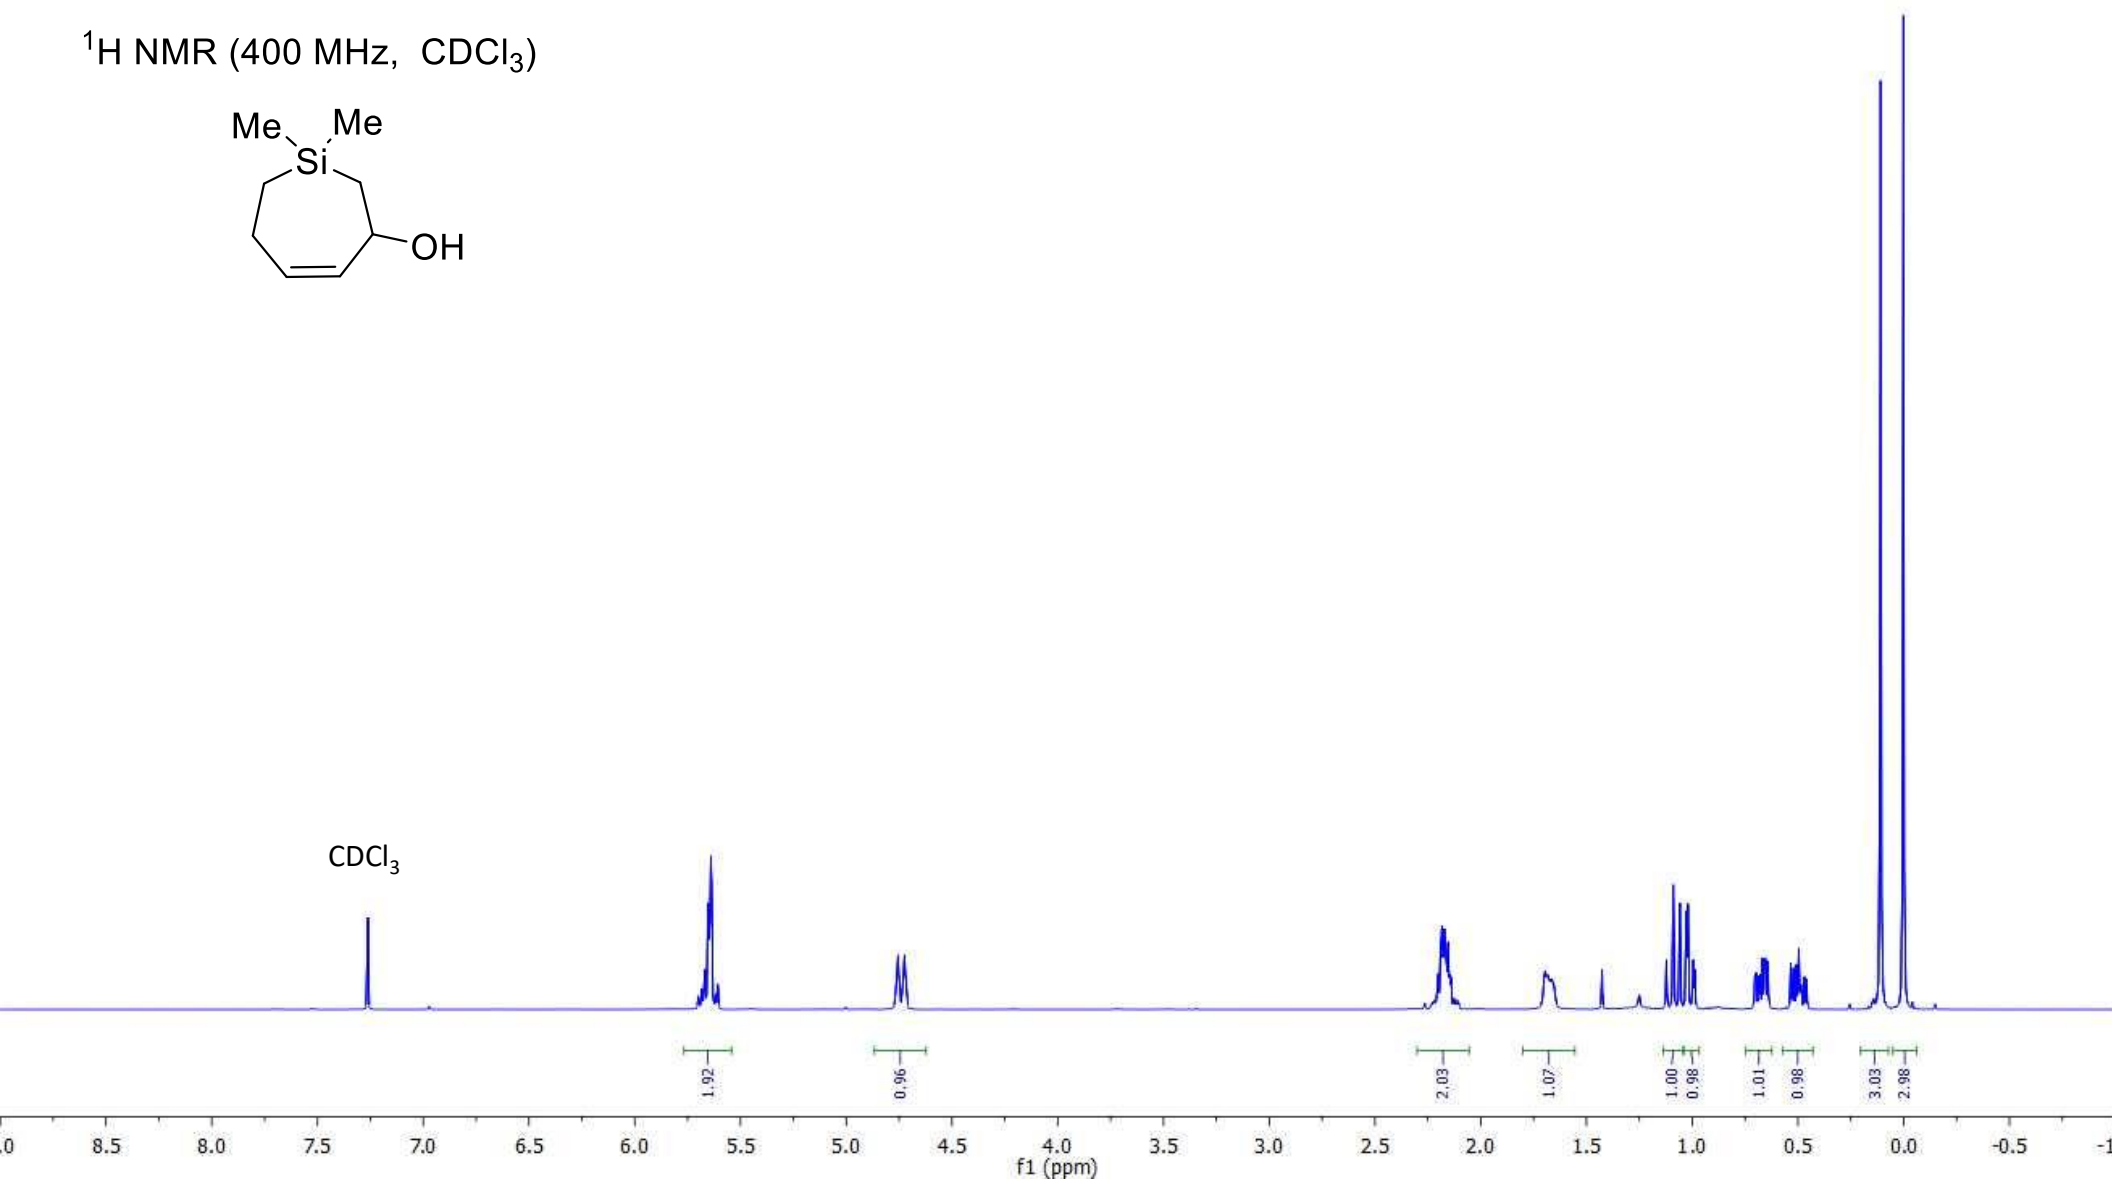

$^{13}\text{C}$  NMR (100 MHz,  $\text{CDCl}_3$ )

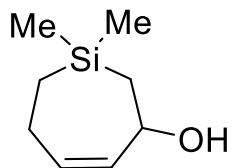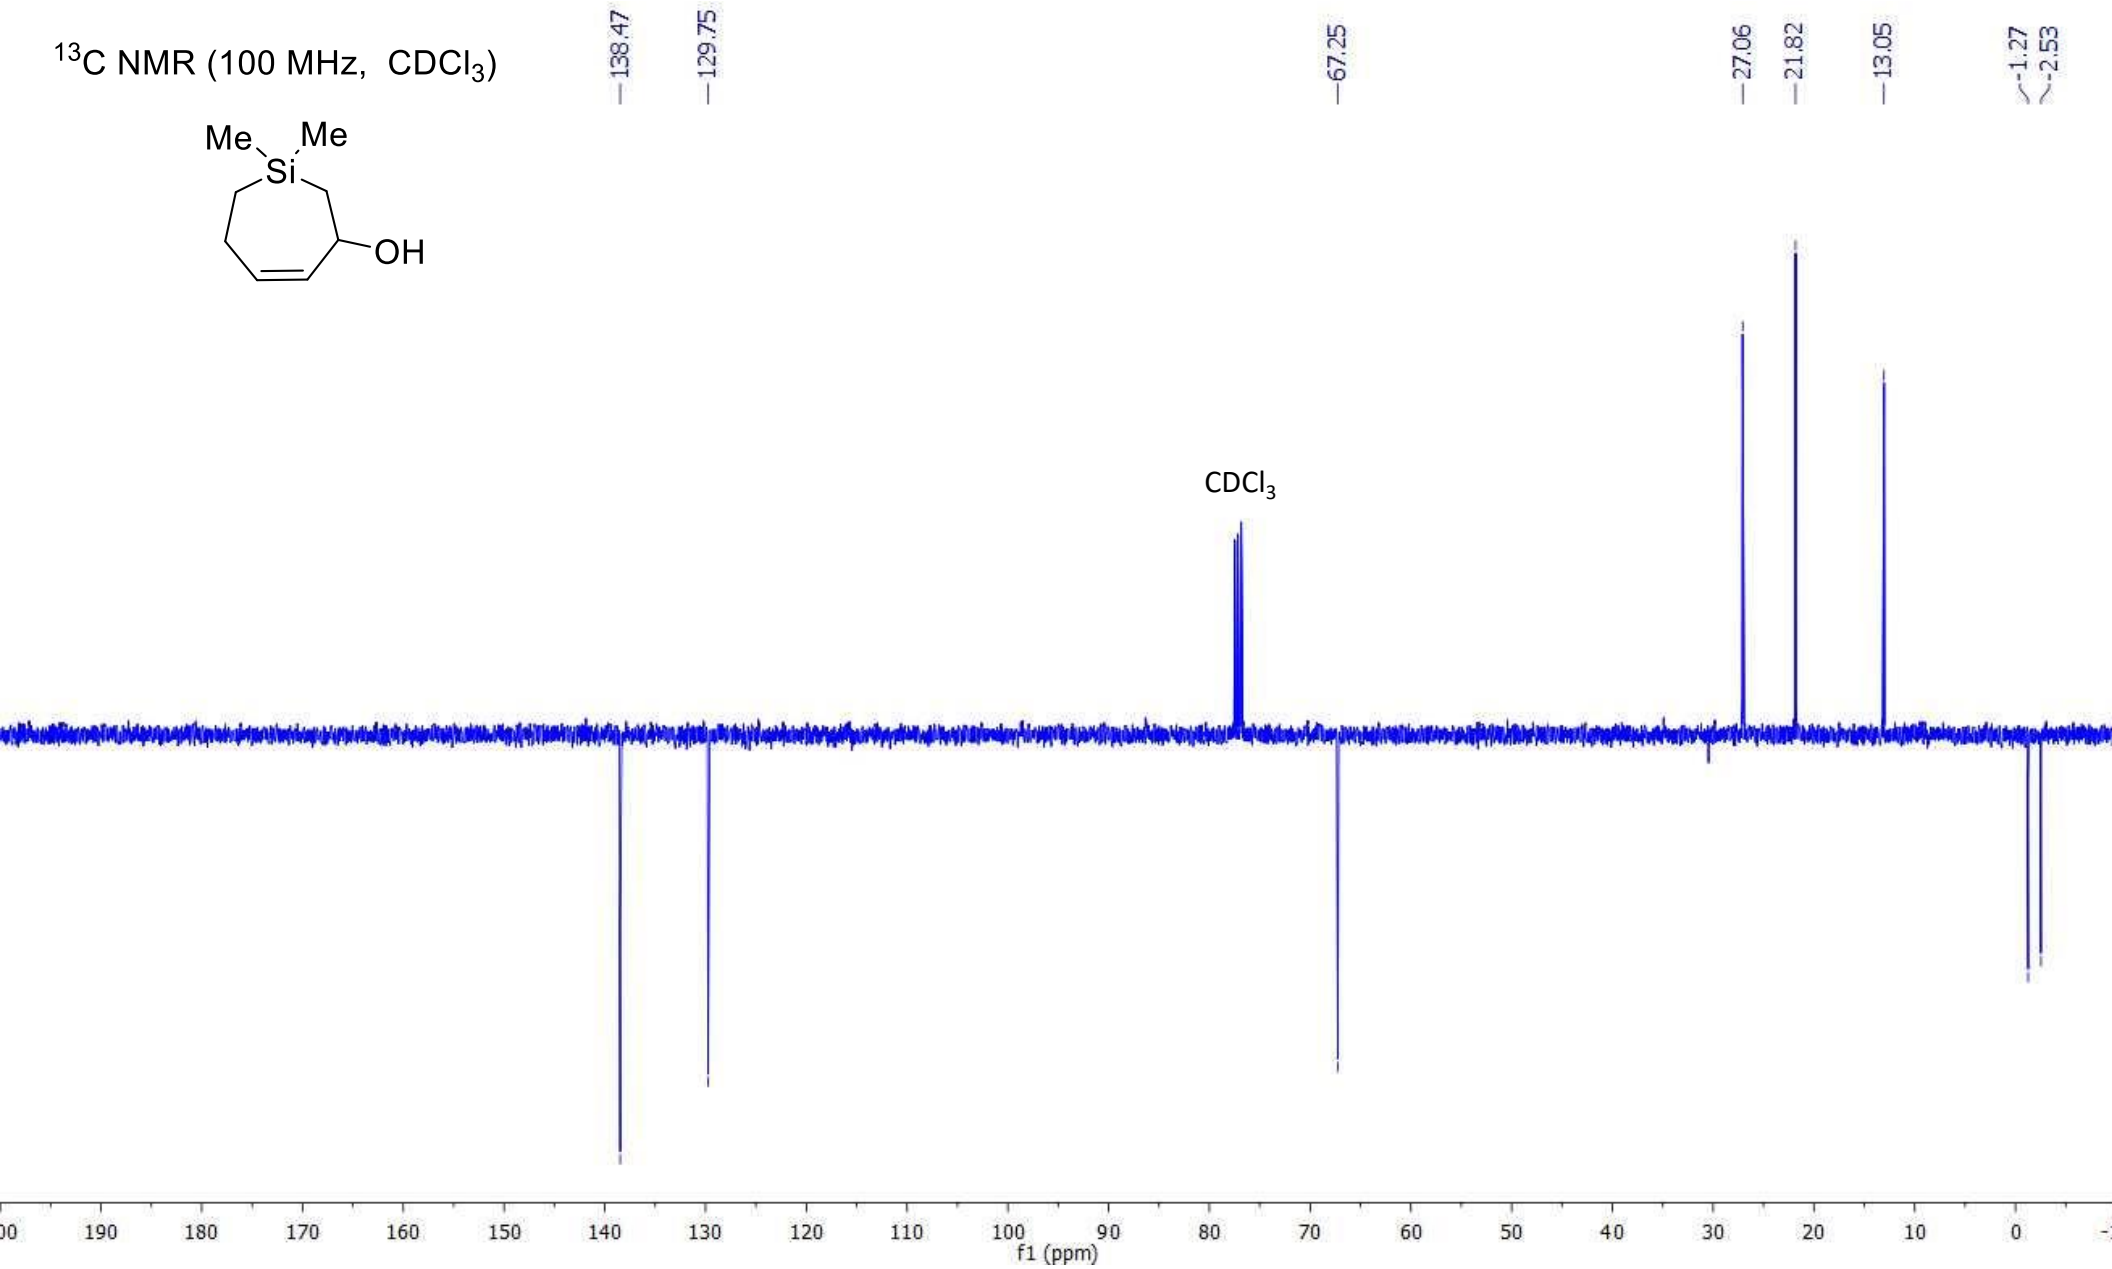

$^1\text{H}$  NMR (600 MHz,  $\text{CDCl}_3$ )

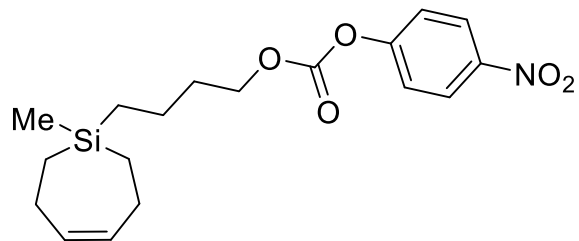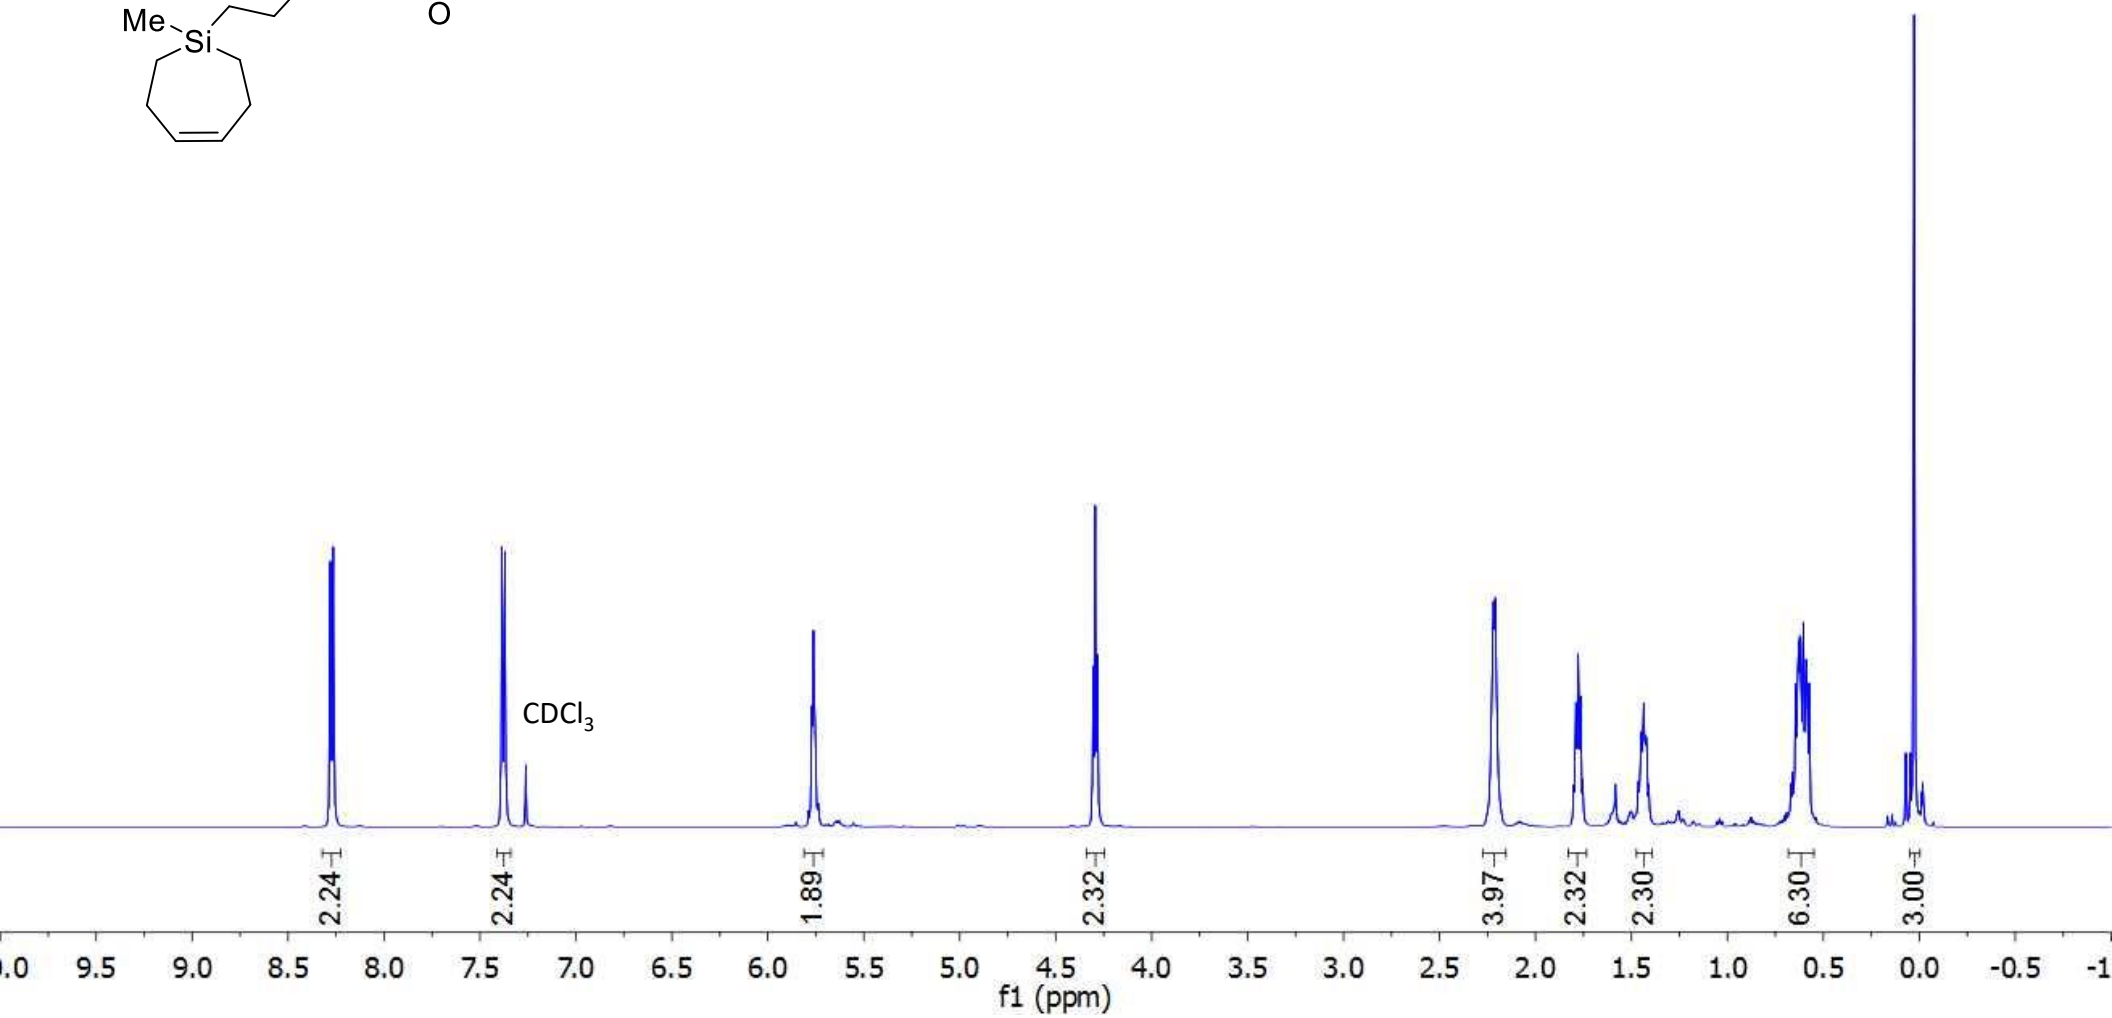

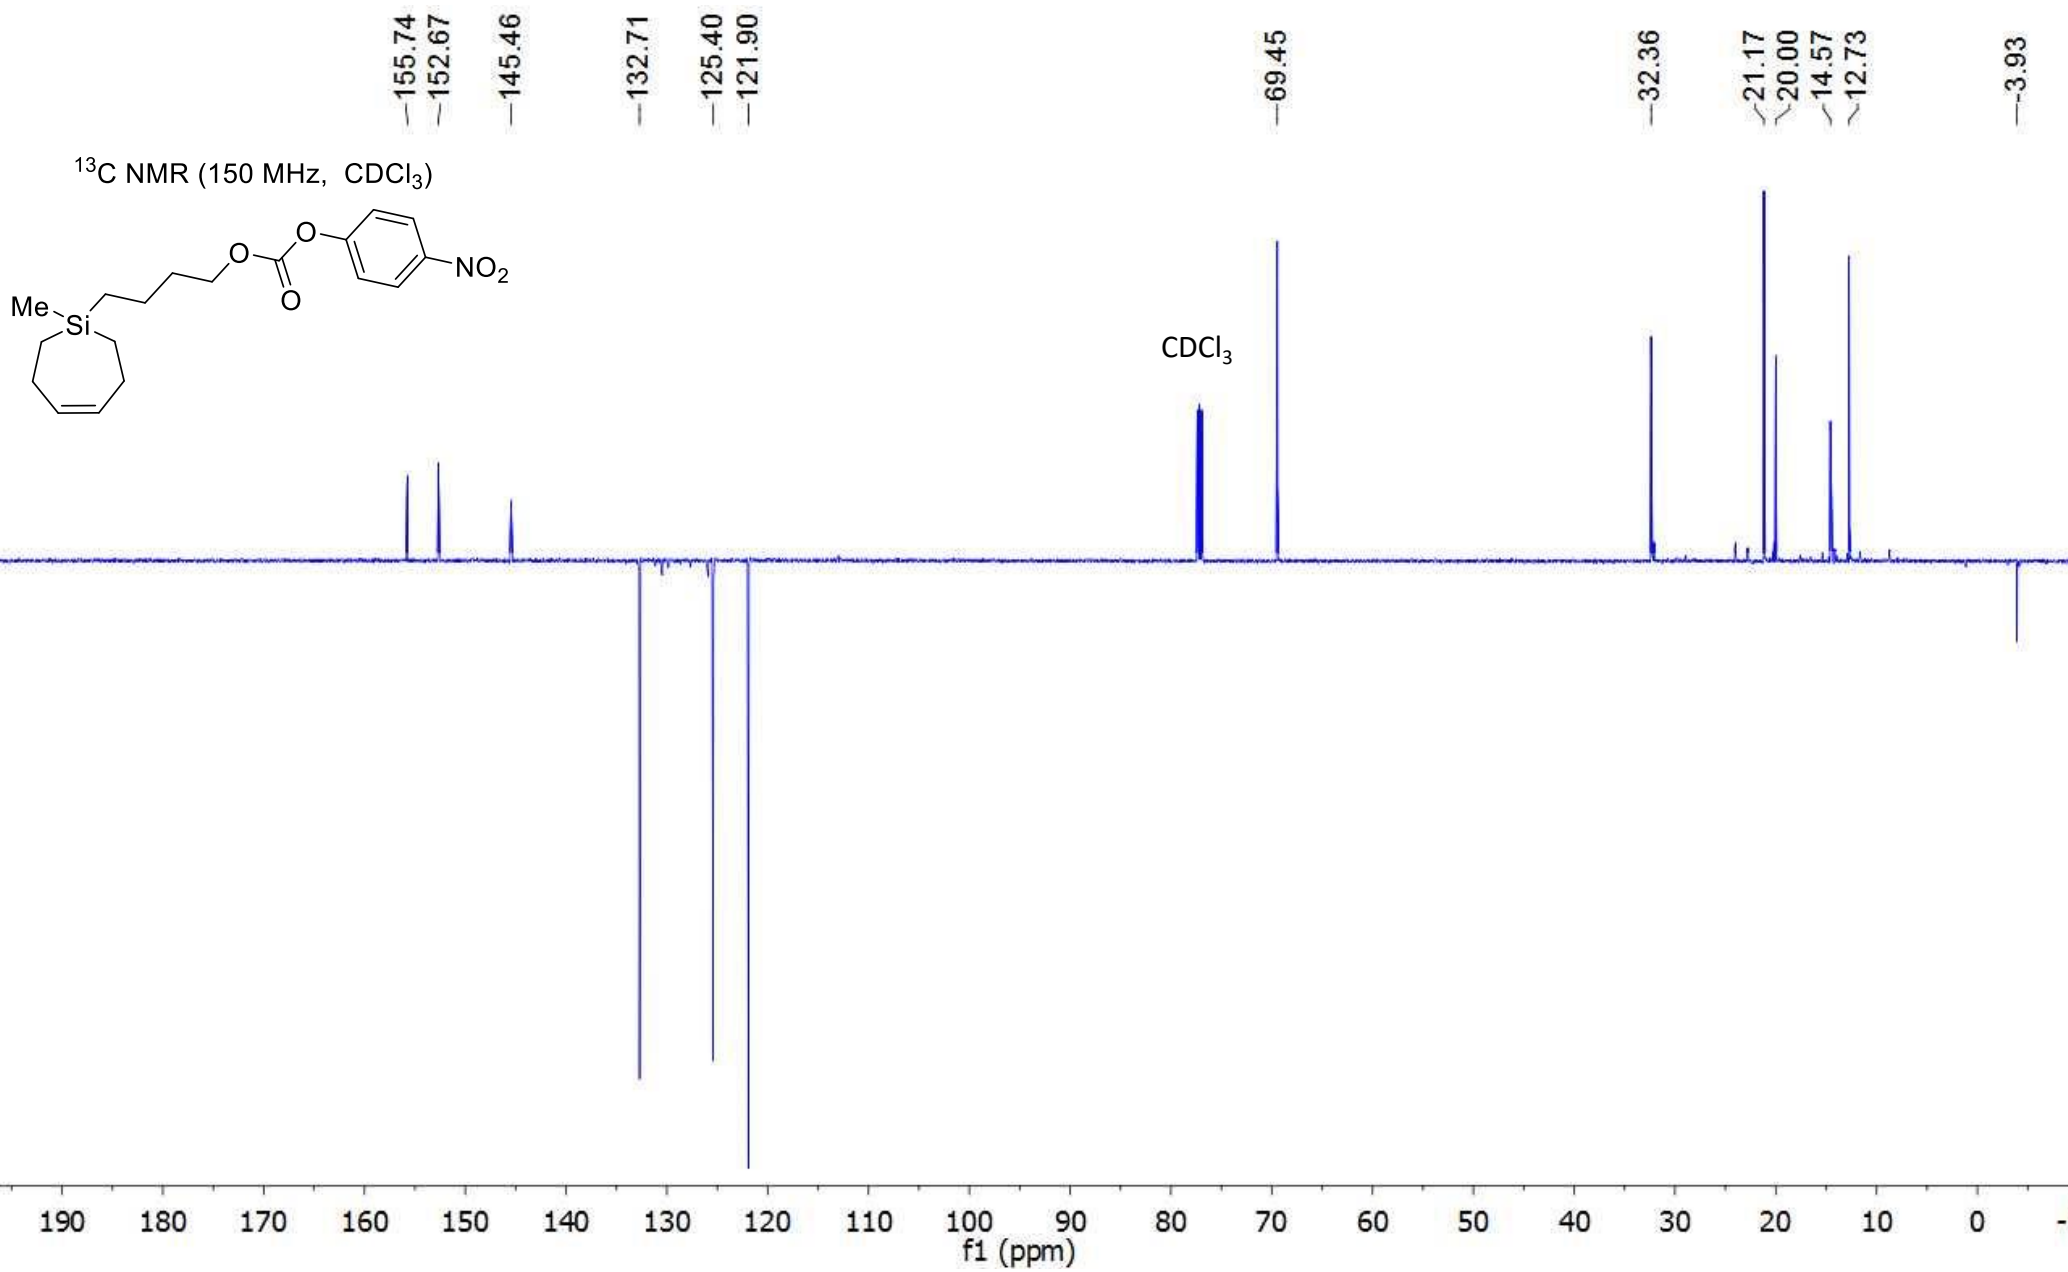



$^1\text{H}$  NMR (600 MHz,  $\text{CDCl}_3$ )

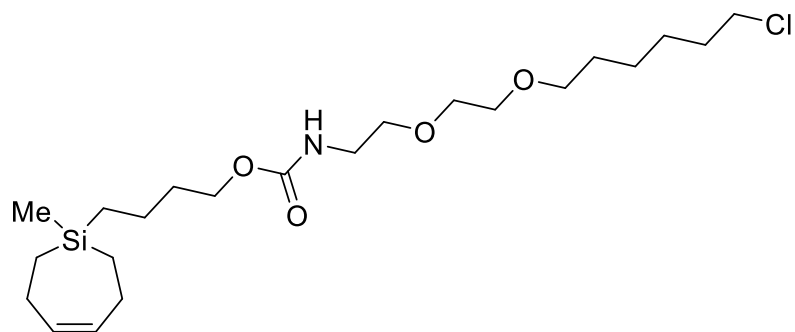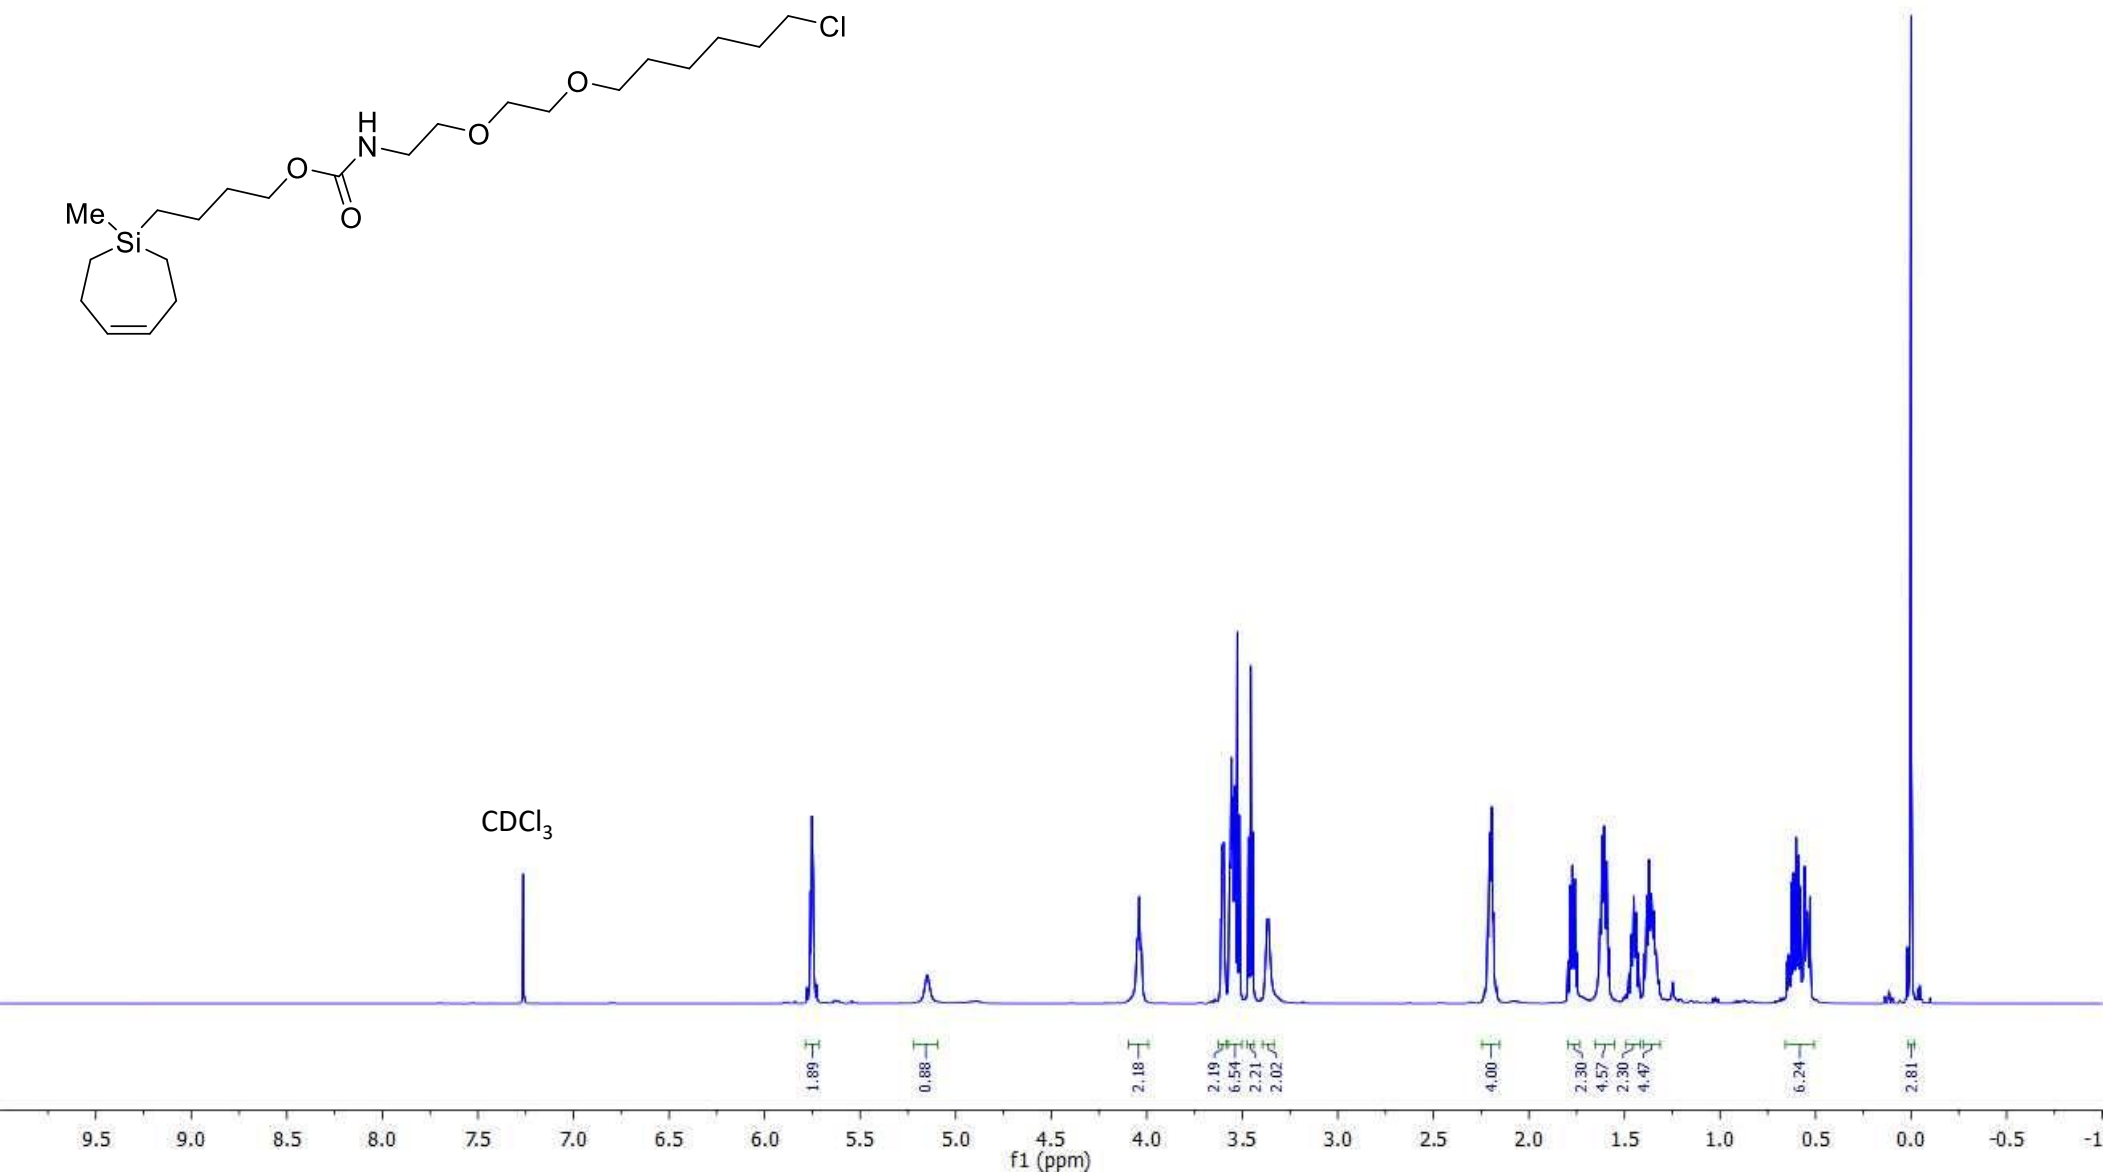

<sup>13</sup>C NMR (150 MHz, CDCl<sub>3</sub>)

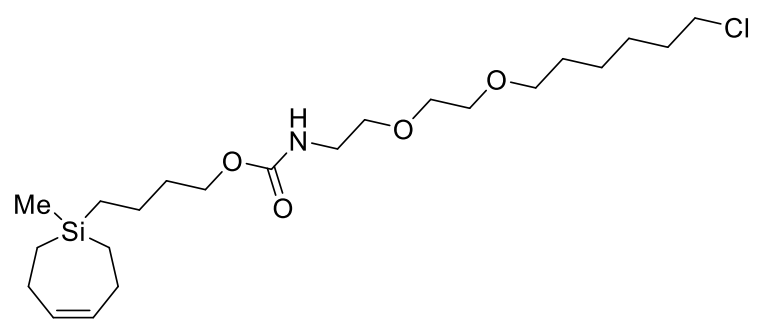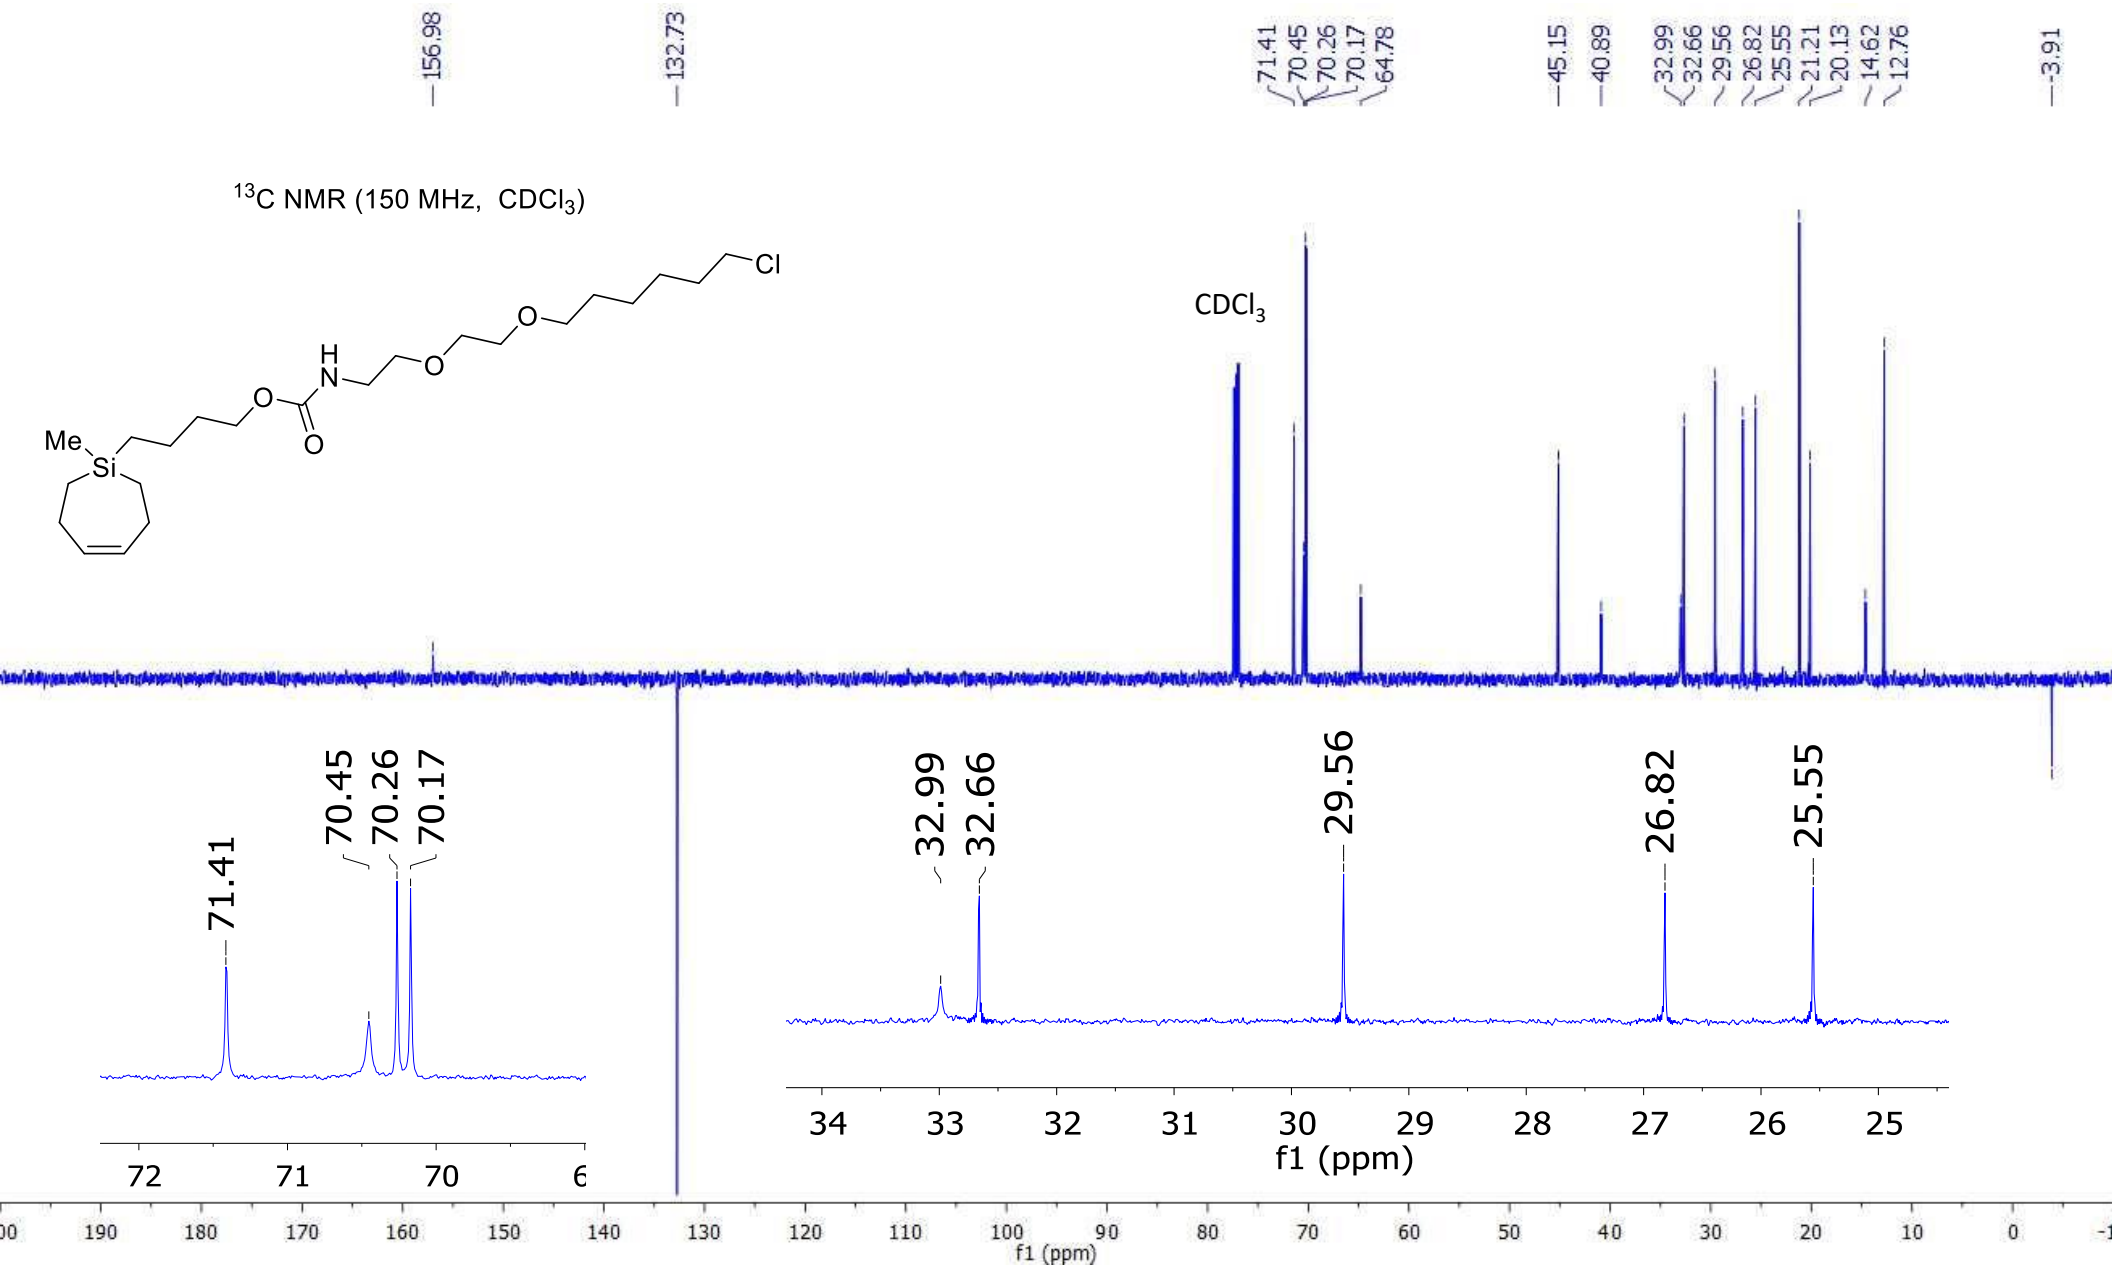

$^1\text{H}$  NMR (600 MHz,  $\text{CDCl}_3$ )

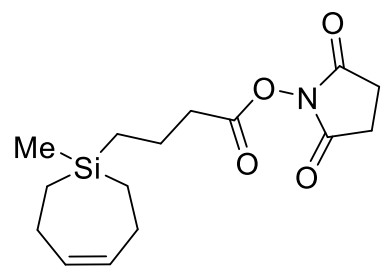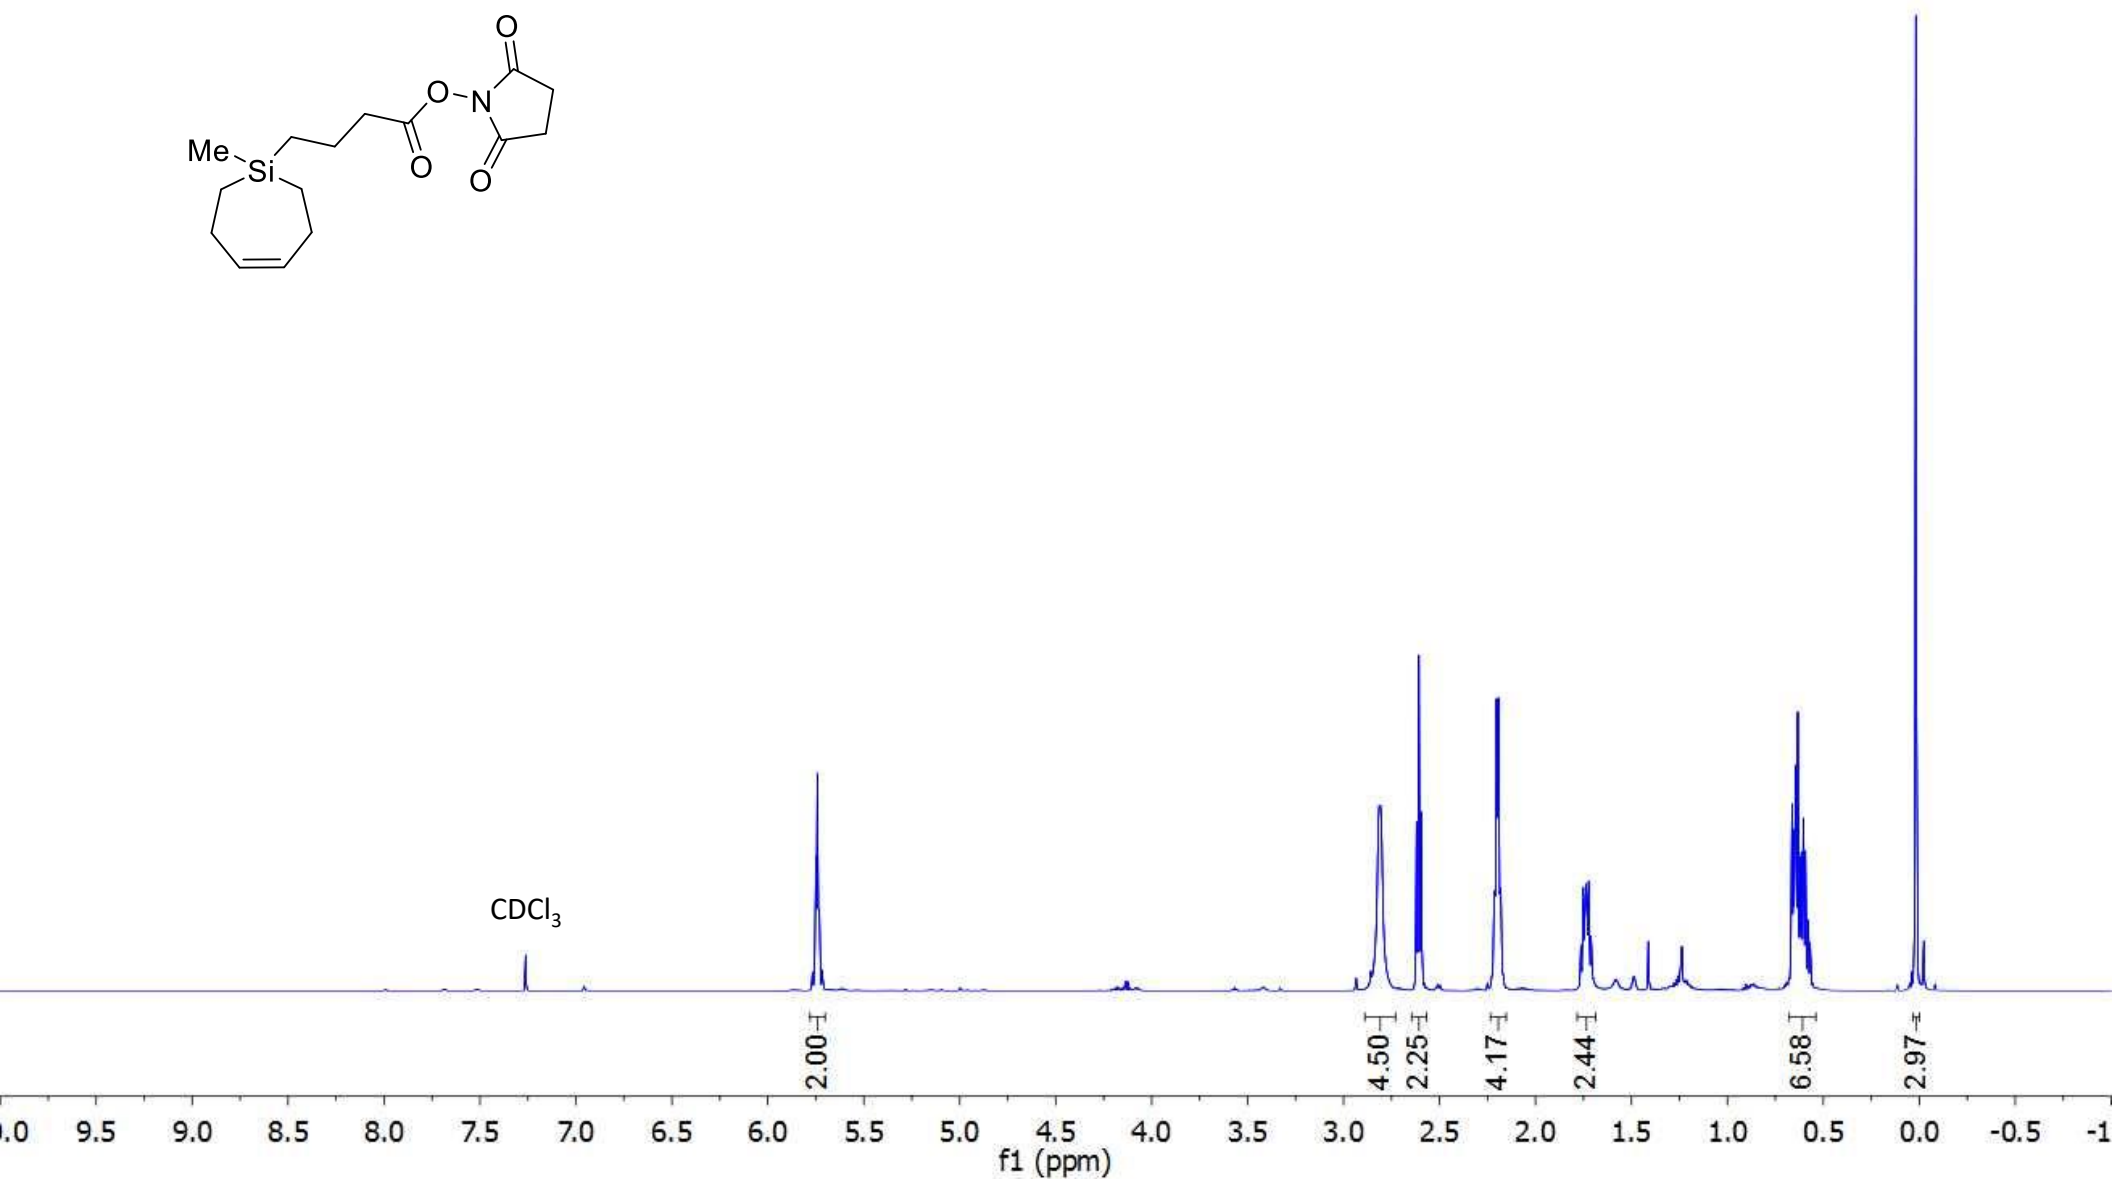

$^{13}\text{C}$  NMR (150 MHz,  $\text{CDCl}_3$ )

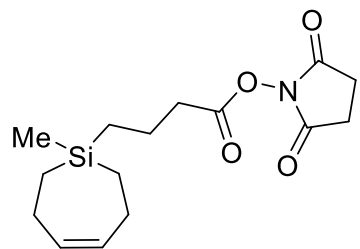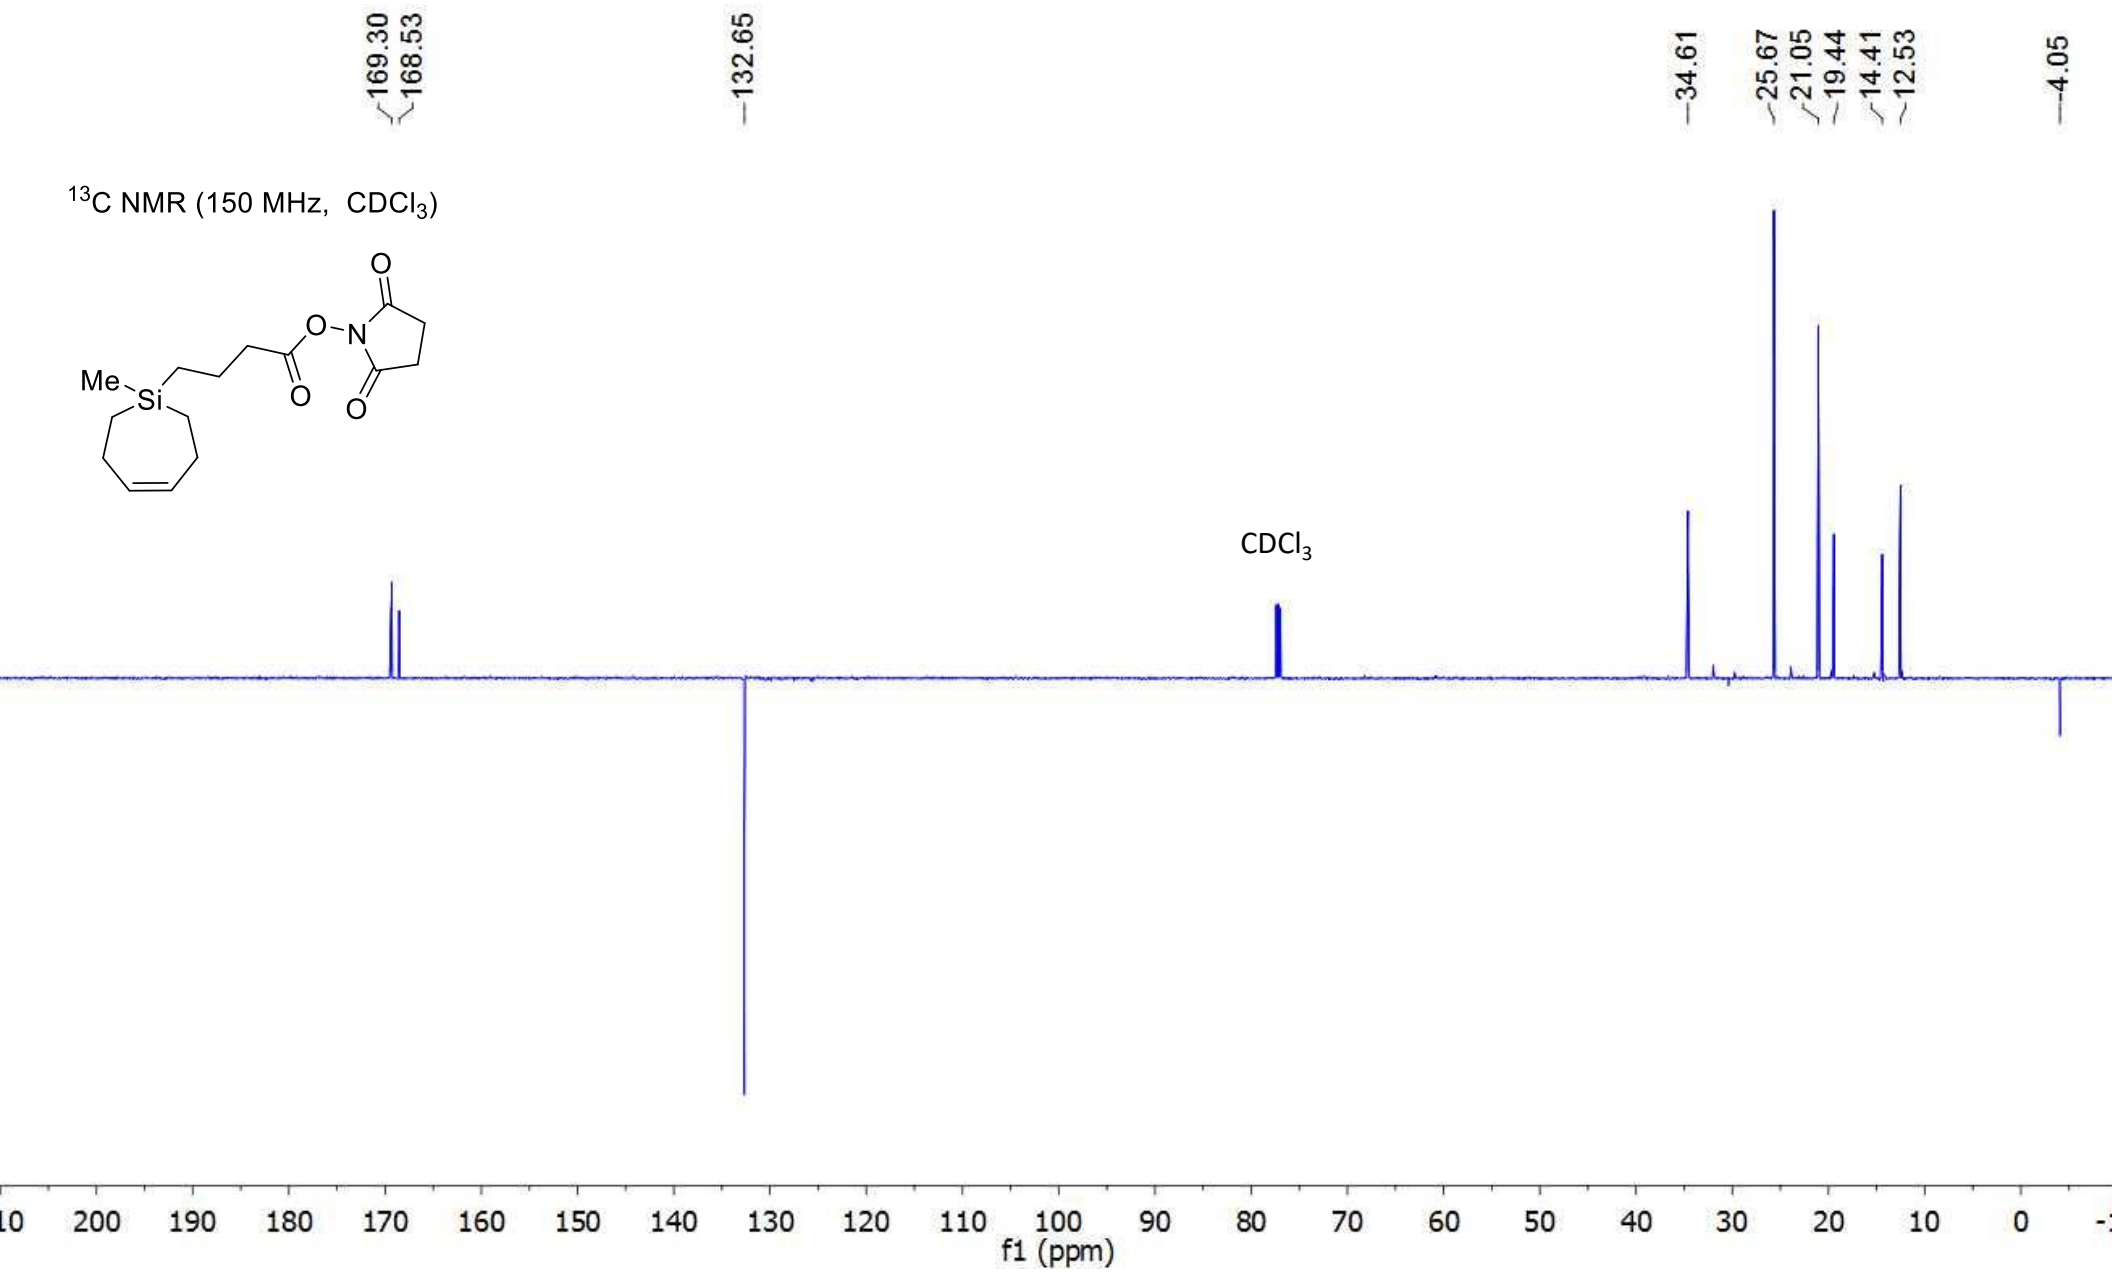

$^1\text{H}$  NMR (400 MHz,  $\text{CD}_3\text{OD}$ )

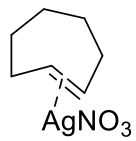

**1a**

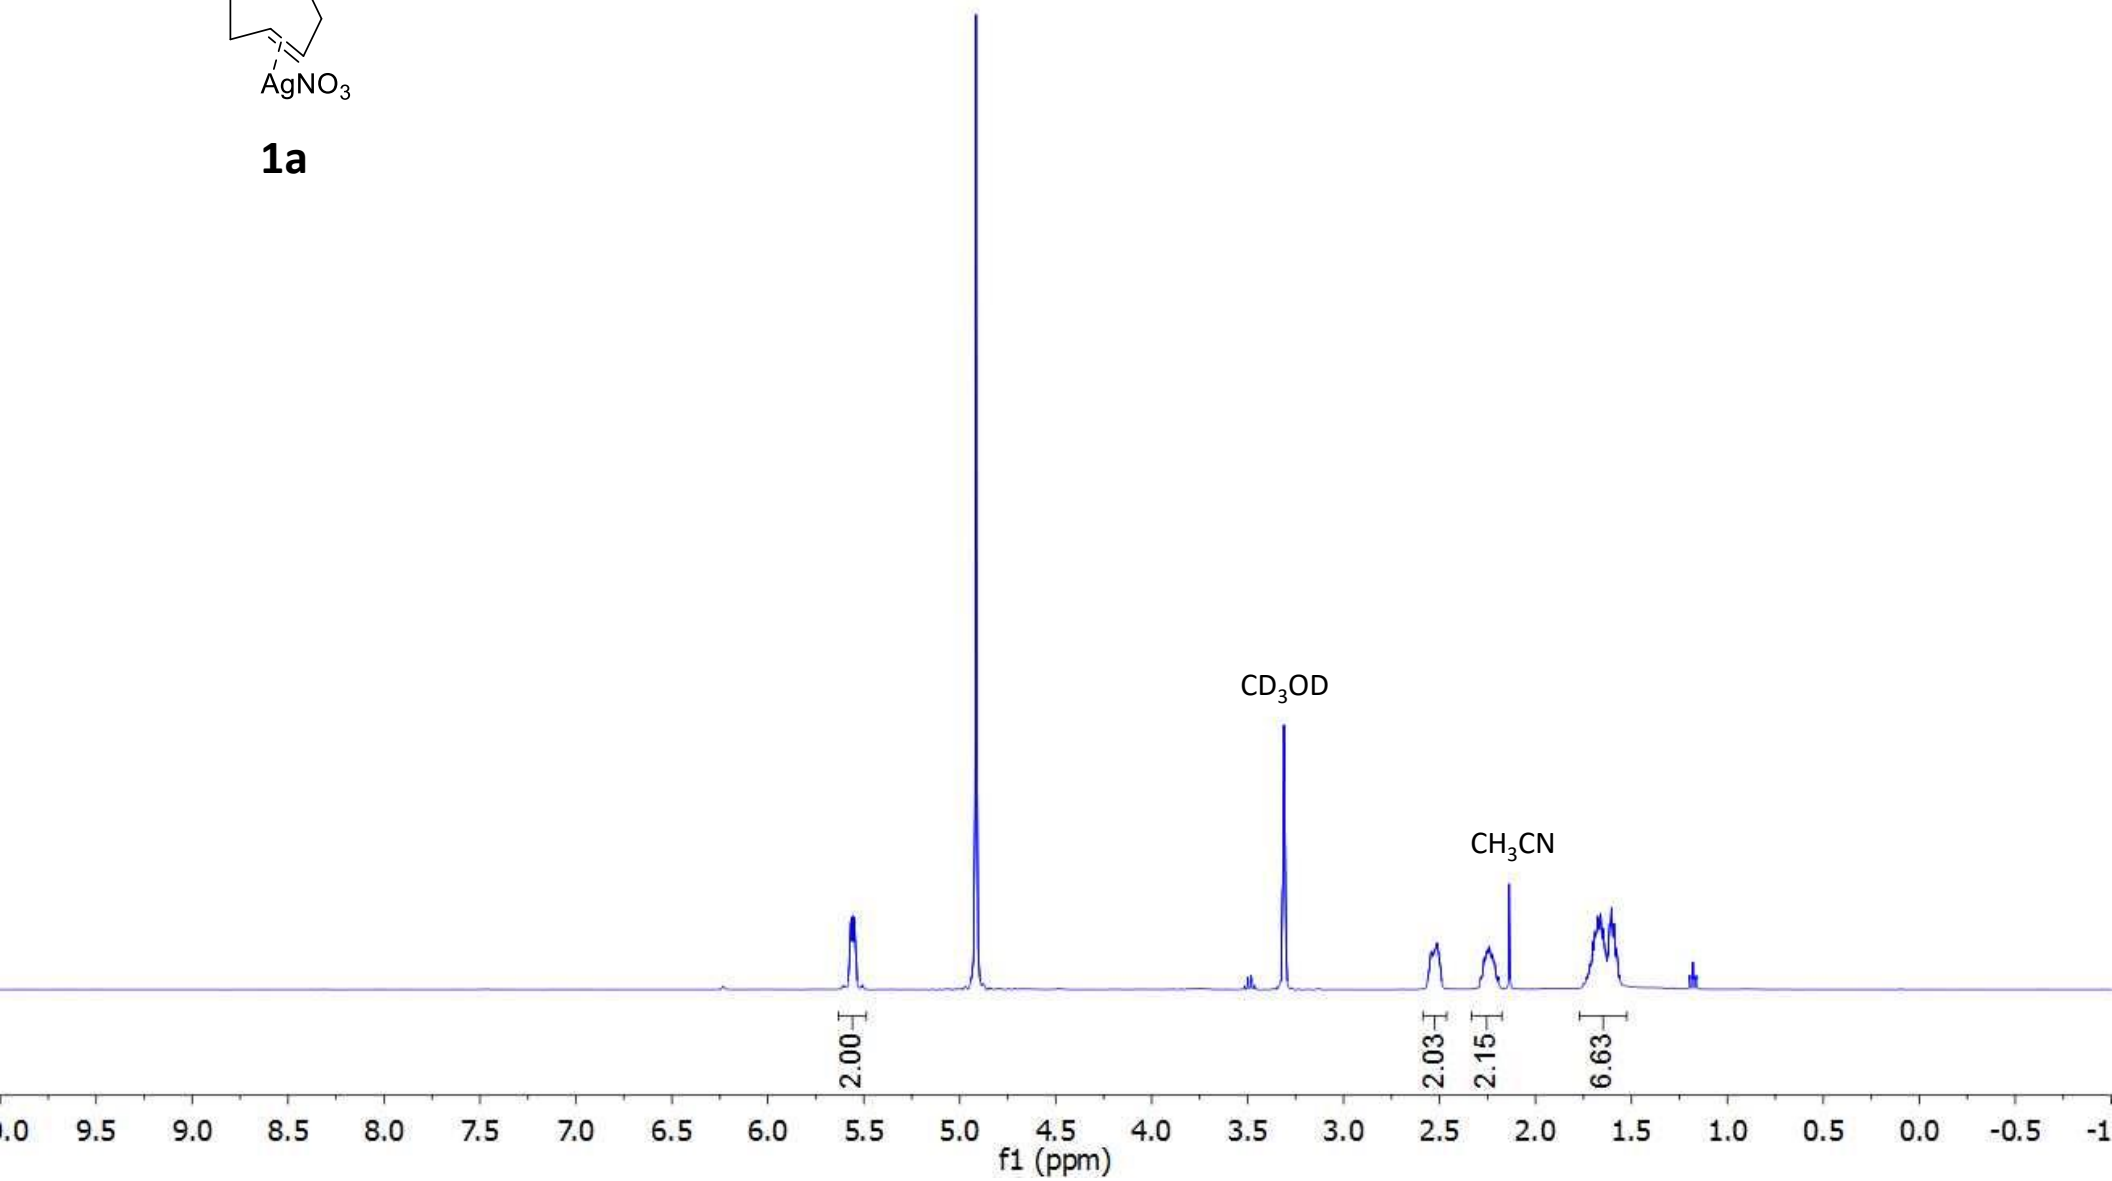

$^{13}\text{C}$  NMR (100 MHz,  $\text{CD}_3\text{OD}$ )

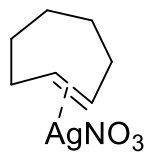

**1a**

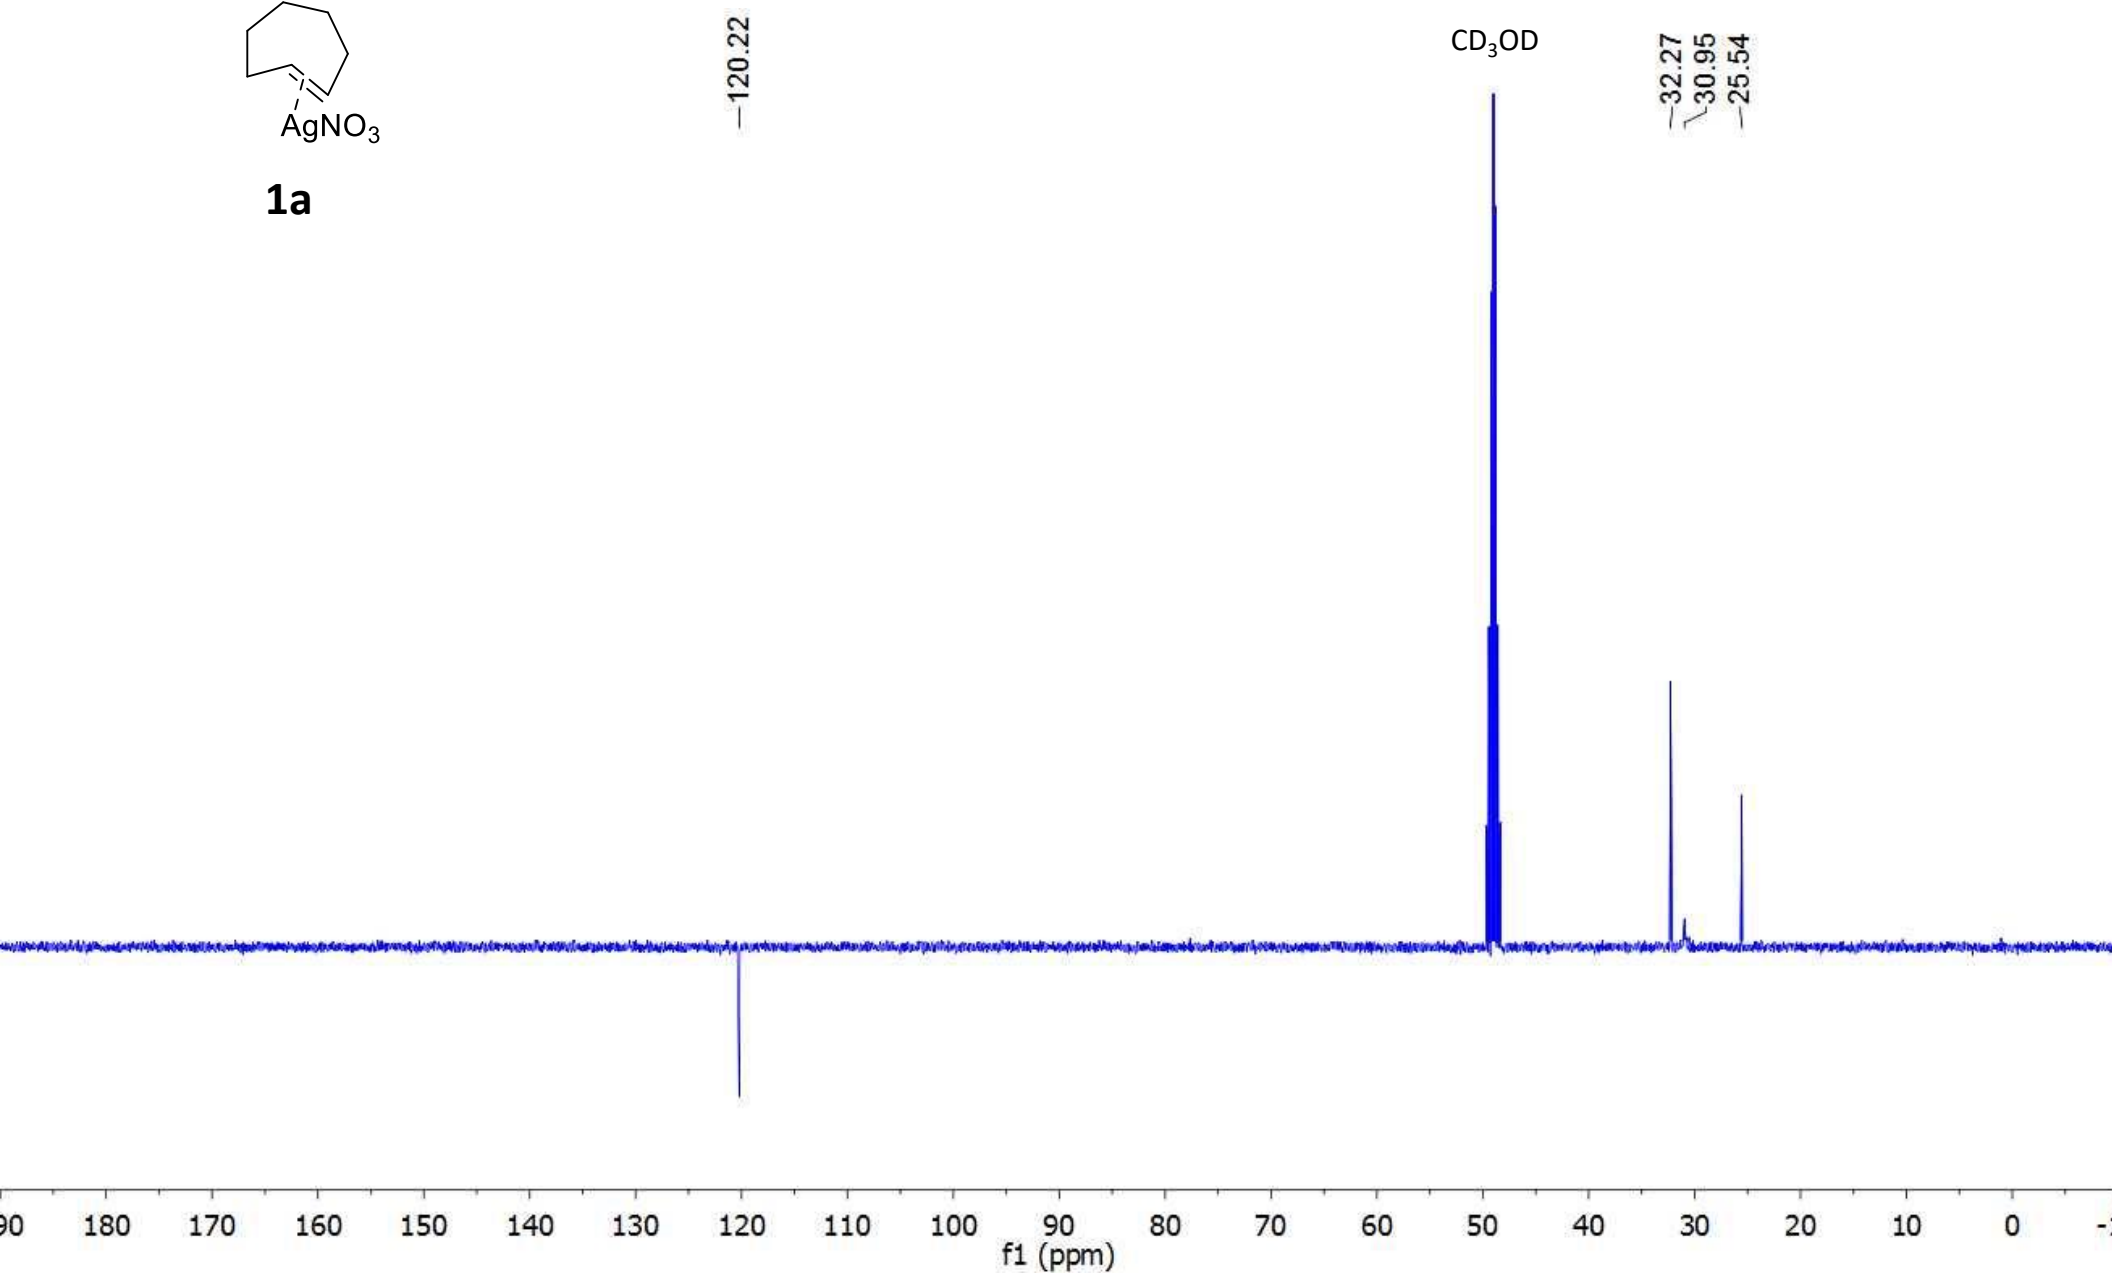

HMQC (400 MHz, CD<sub>3</sub>OD)

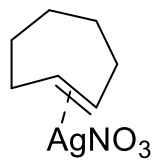

**1a**

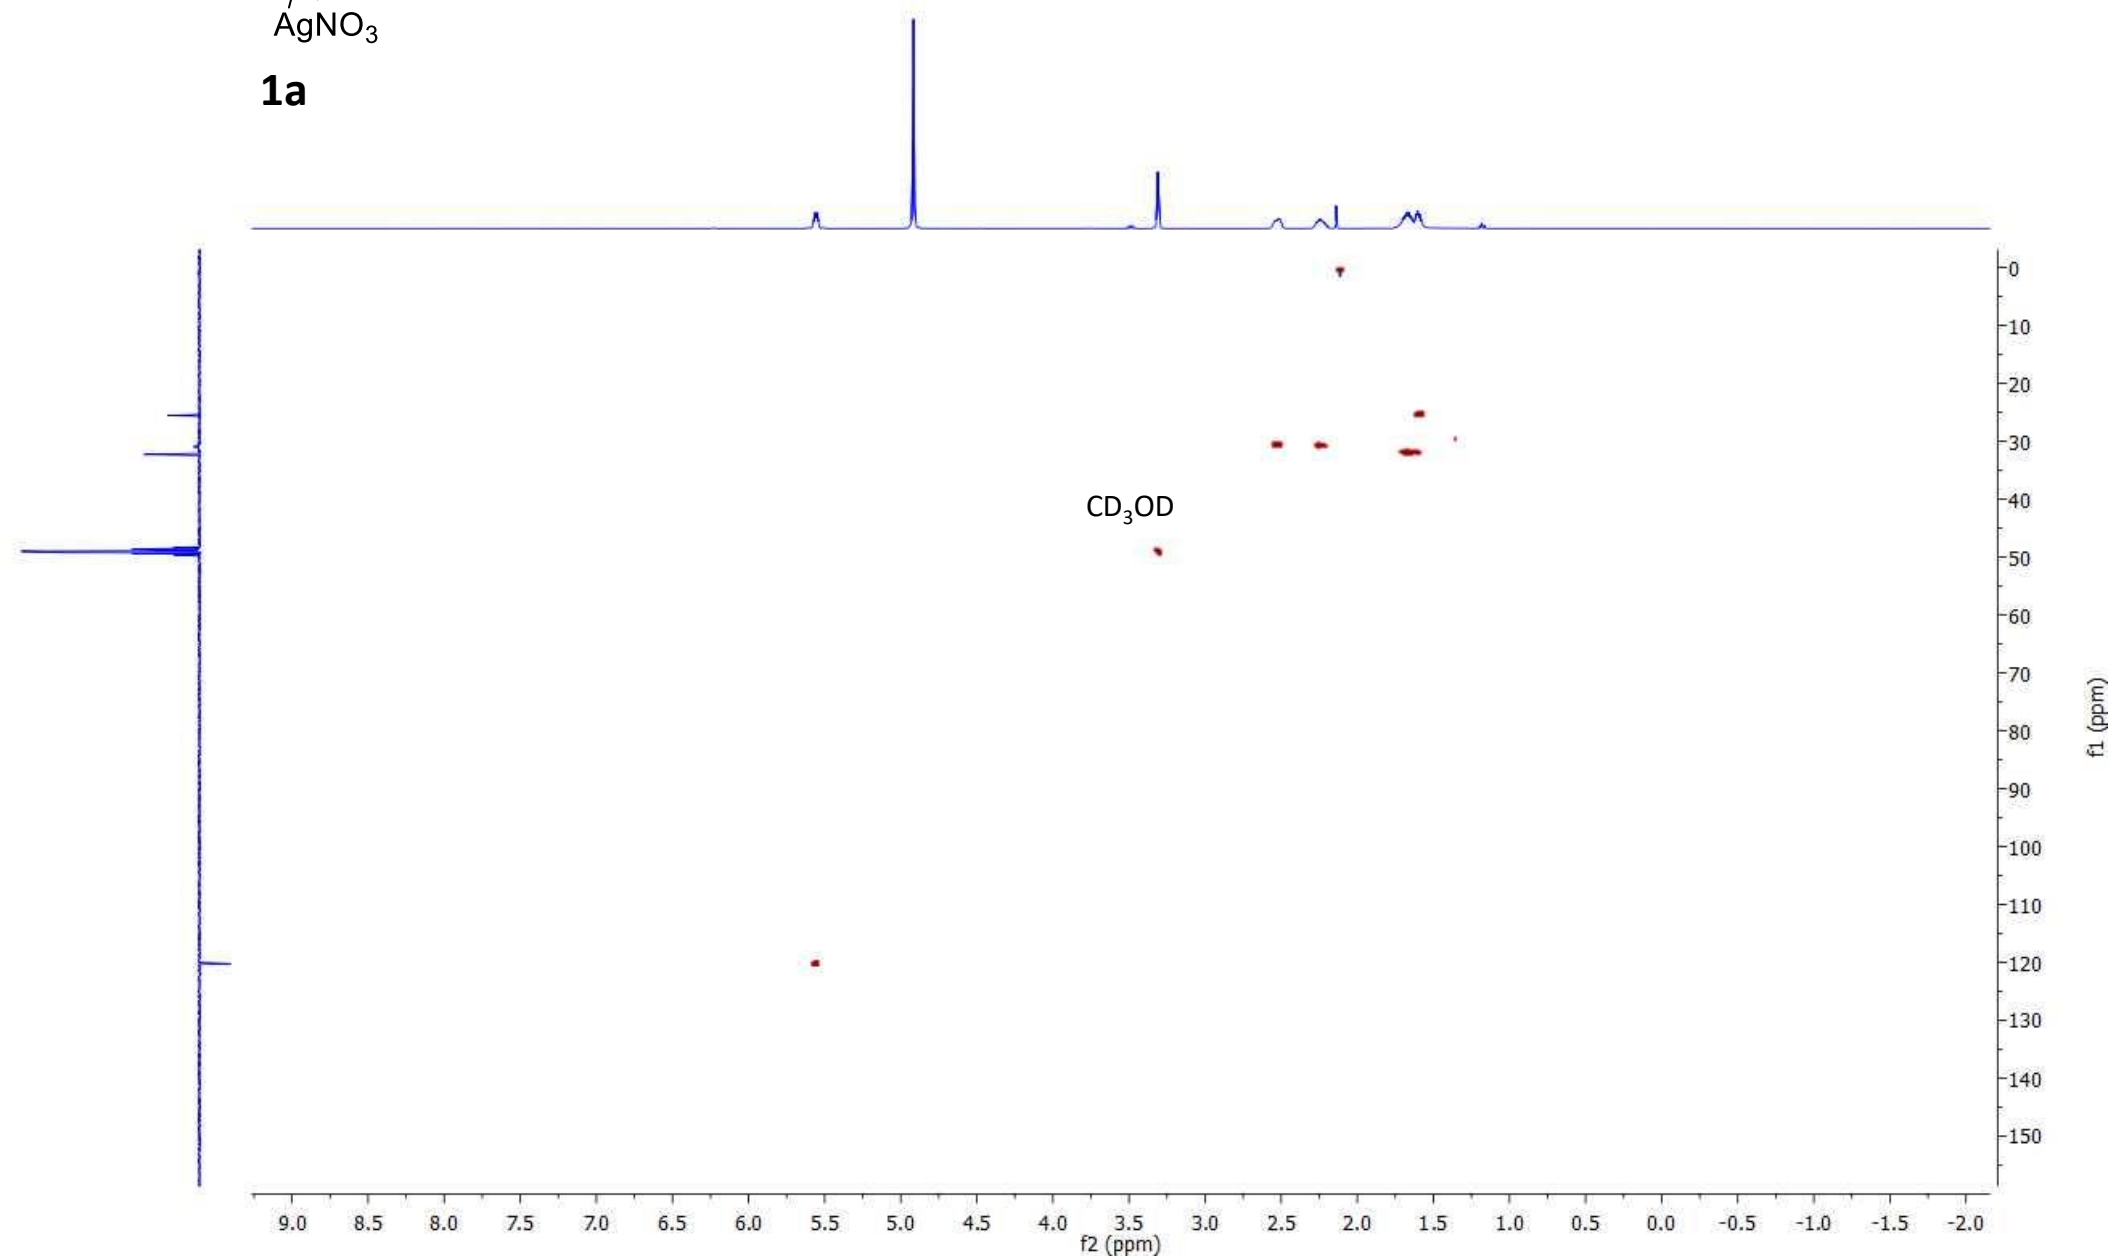

$^1\text{H}$  NMR (400 MHz,  $\text{CD}_3\text{OD}$ )

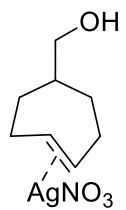

**1b**

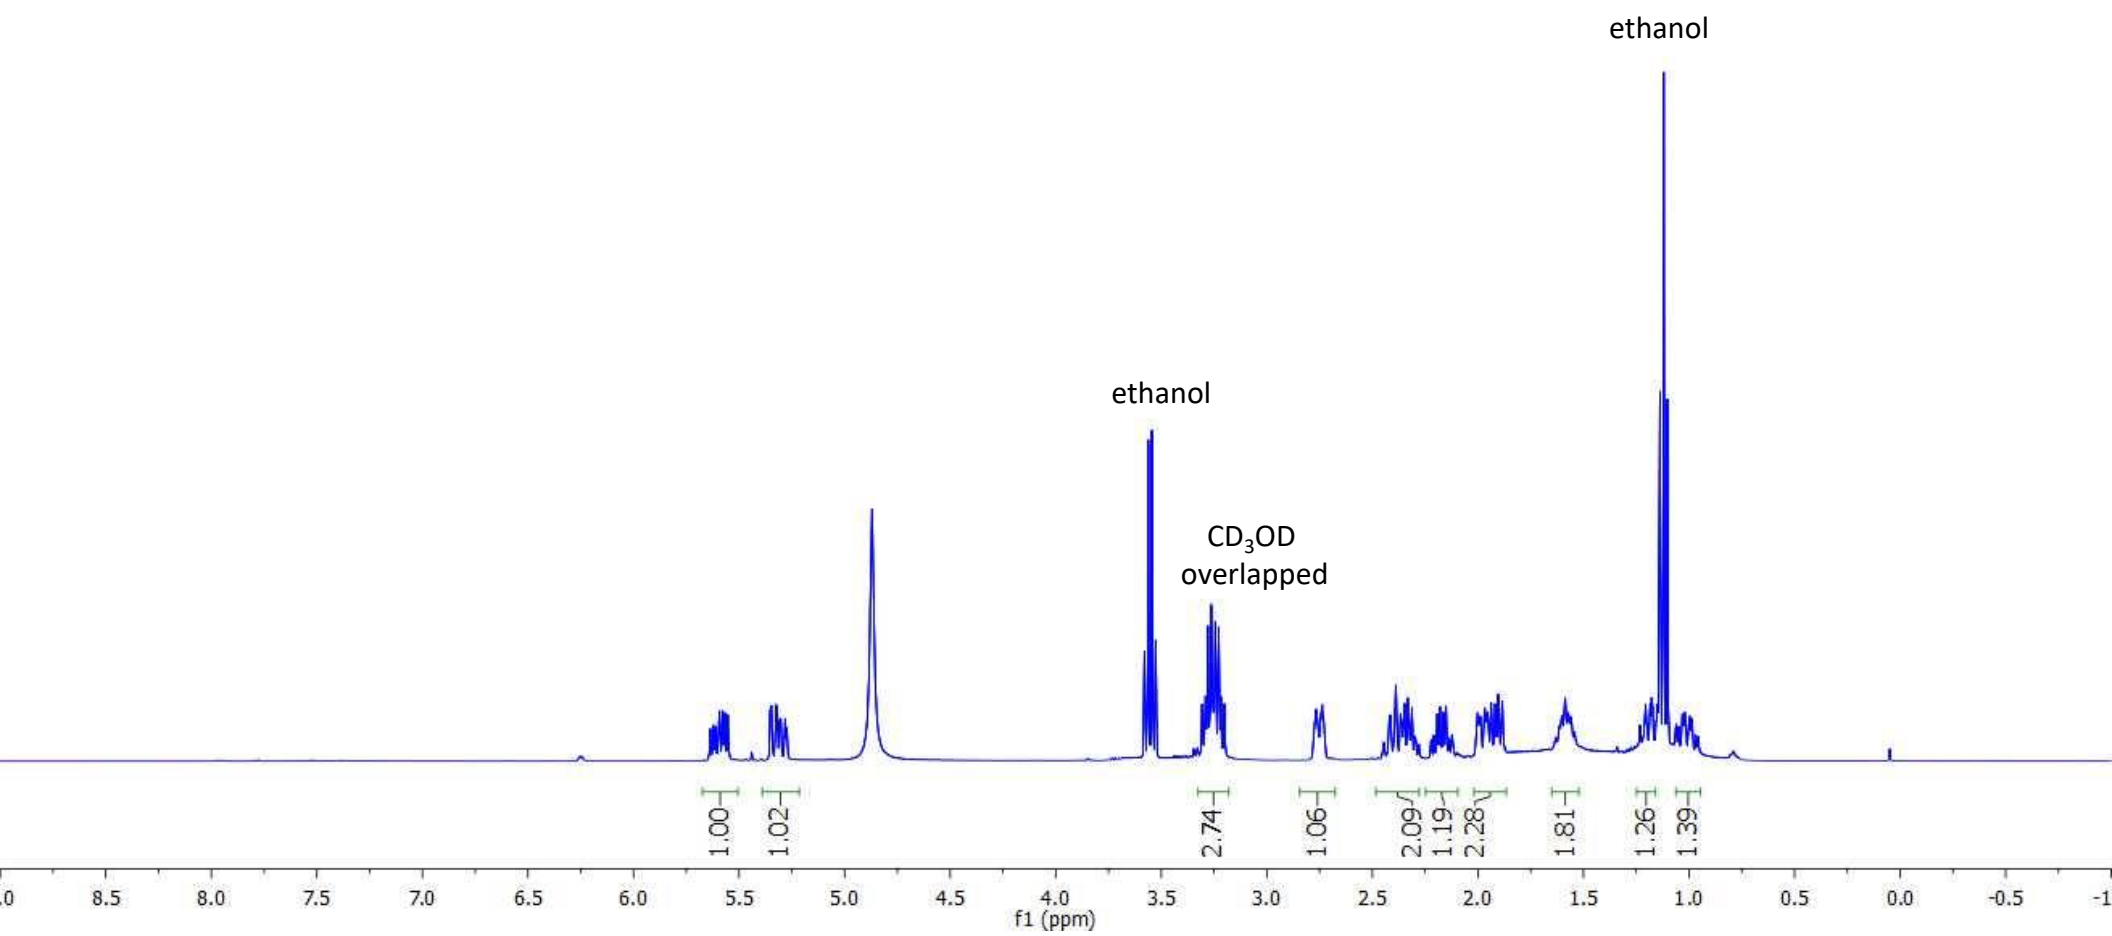



$^{13}\text{C}$  NMR (100 MHz,  $\text{CD}_3\text{OD}$ )

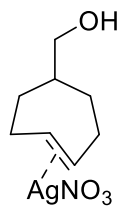

**1b**

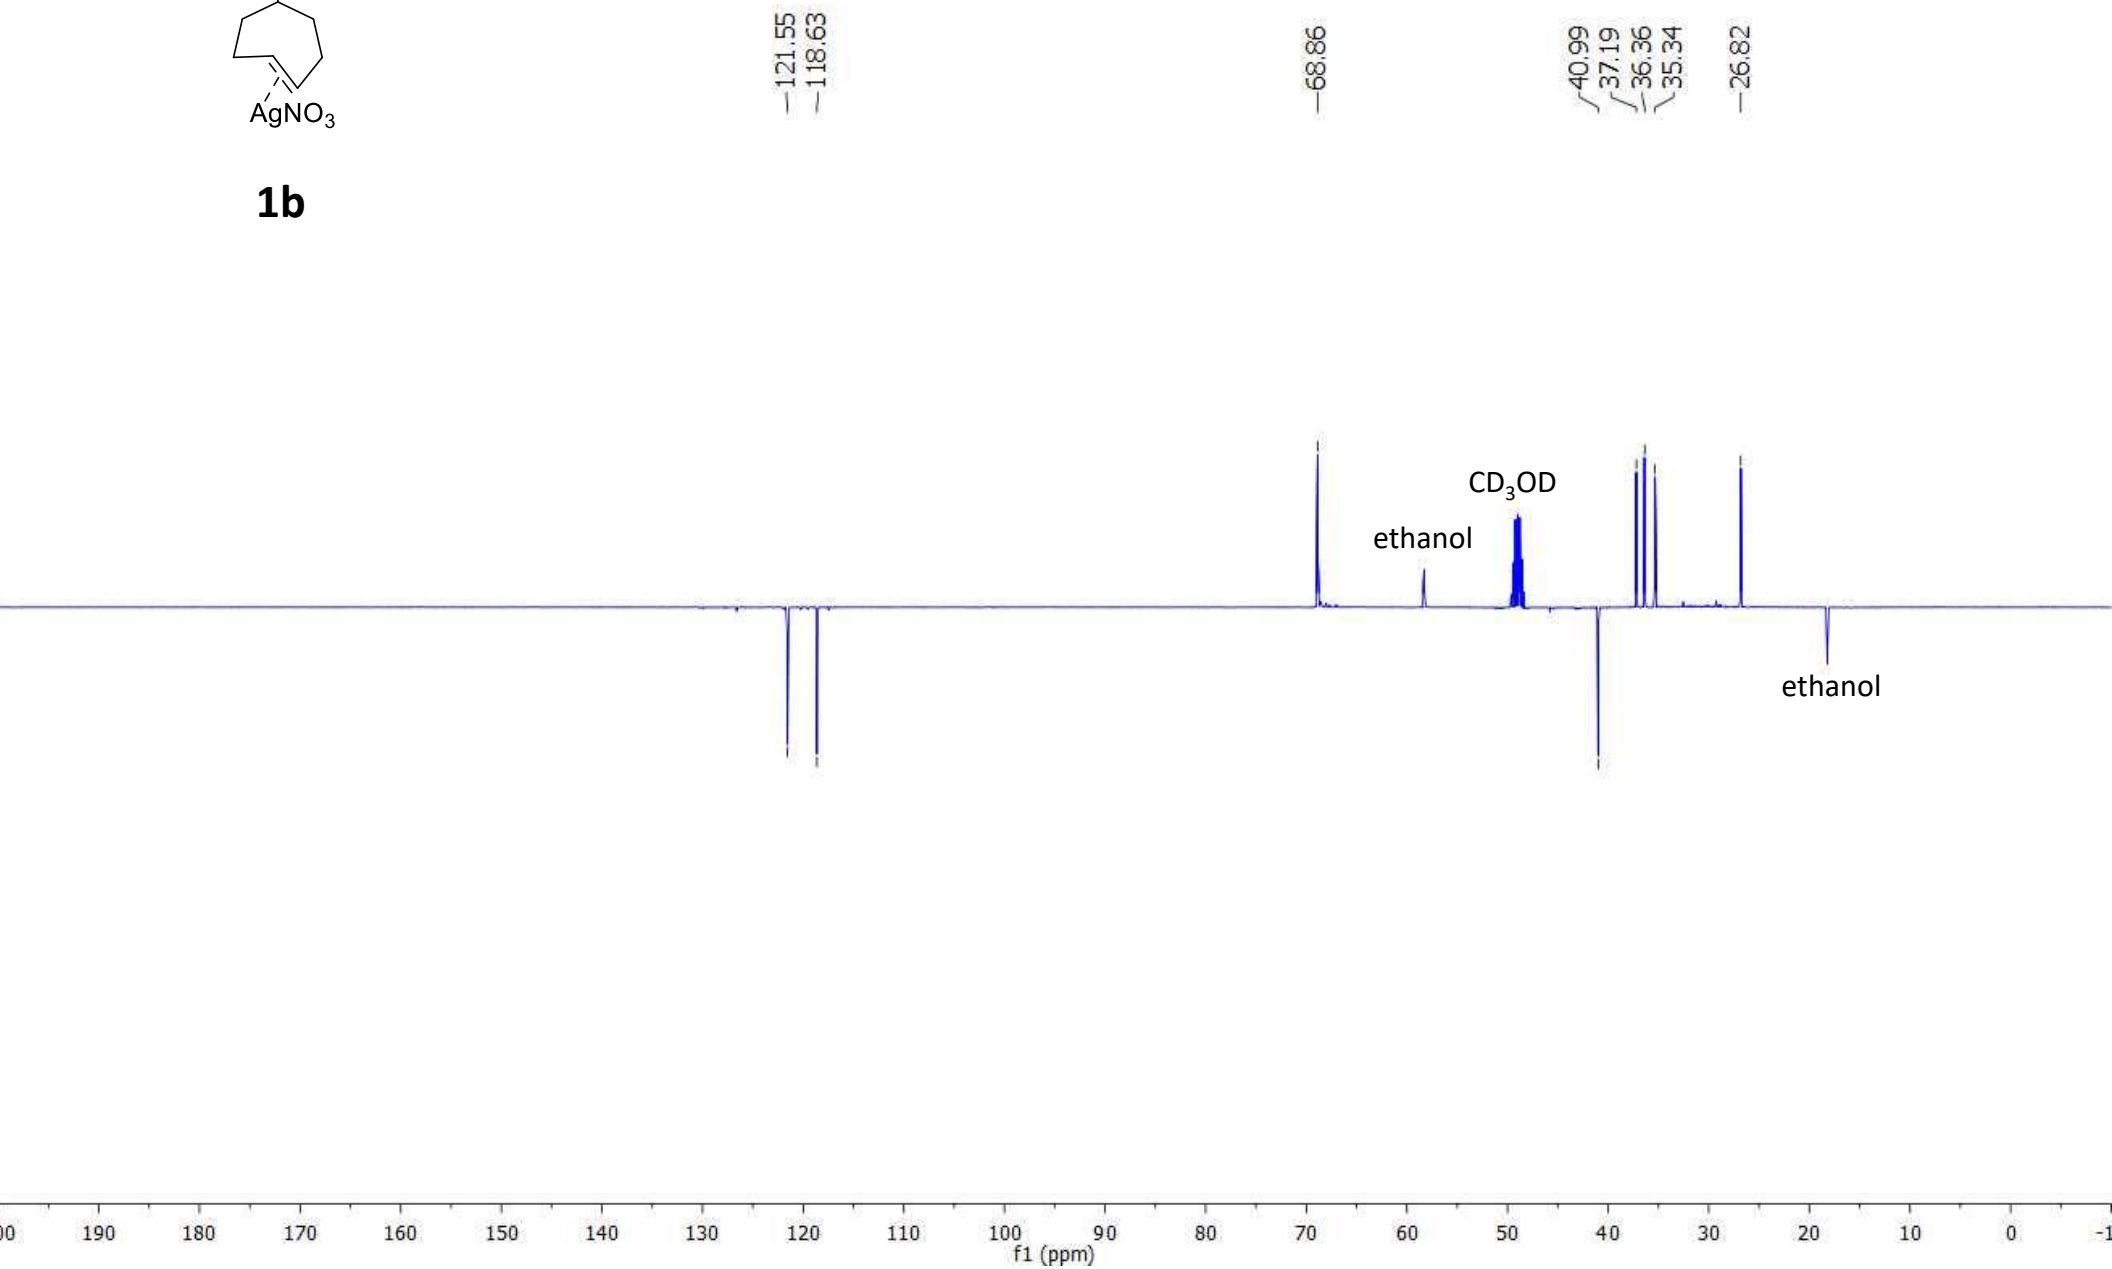

$^1\text{H}$  NMR (400 MHz,  $\text{CD}_3\text{OD}$ )

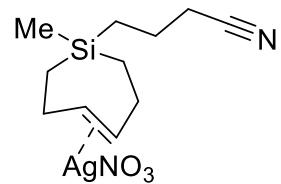

**2b**

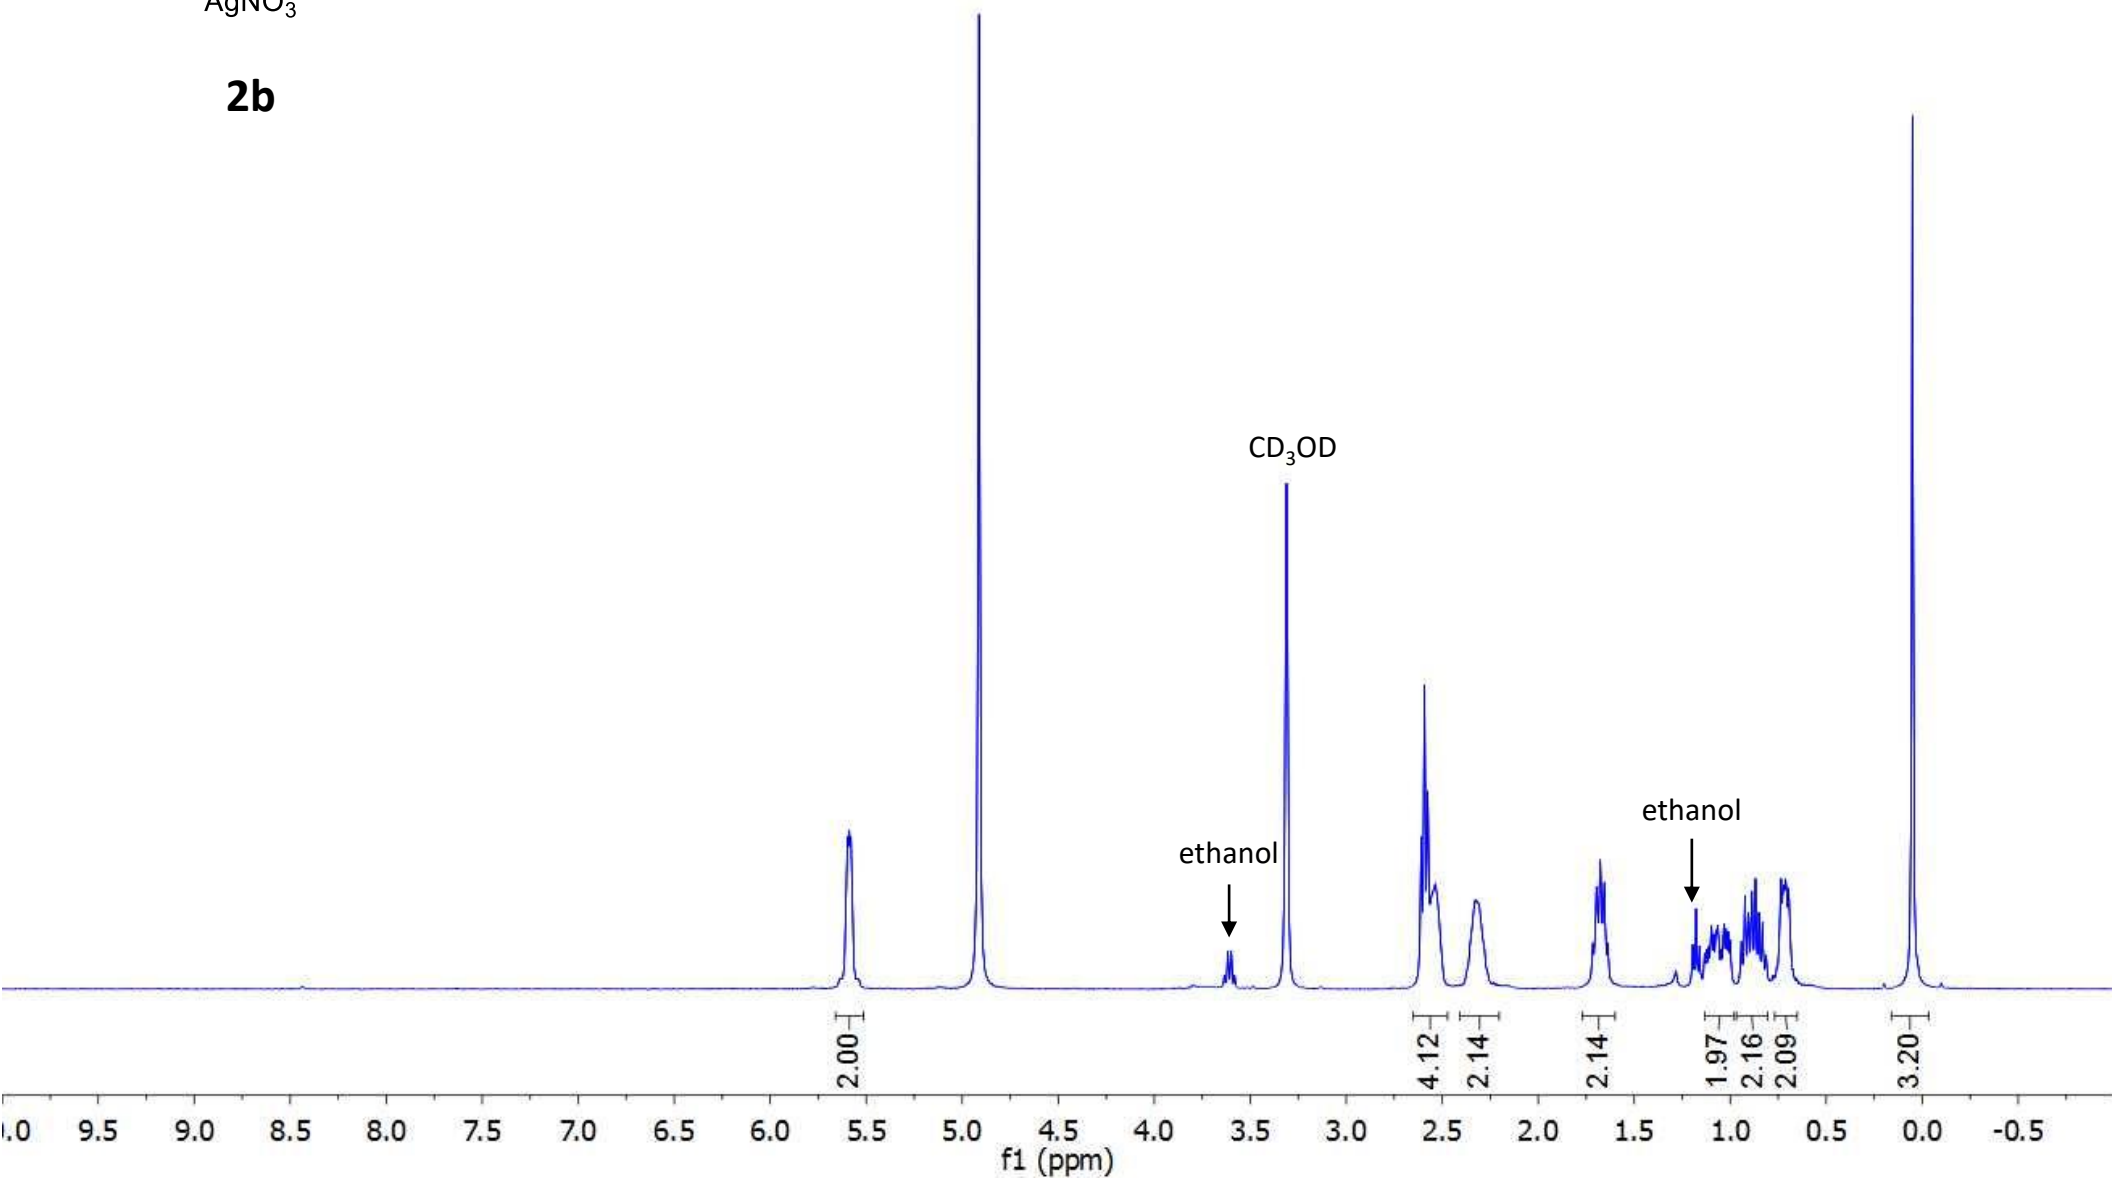

$^{13}\text{C}$  NMR (100 MHz,  $\text{CD}_3\text{OD}$ )

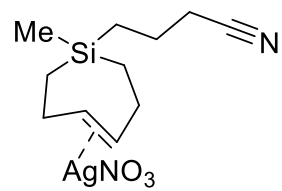

**2b**

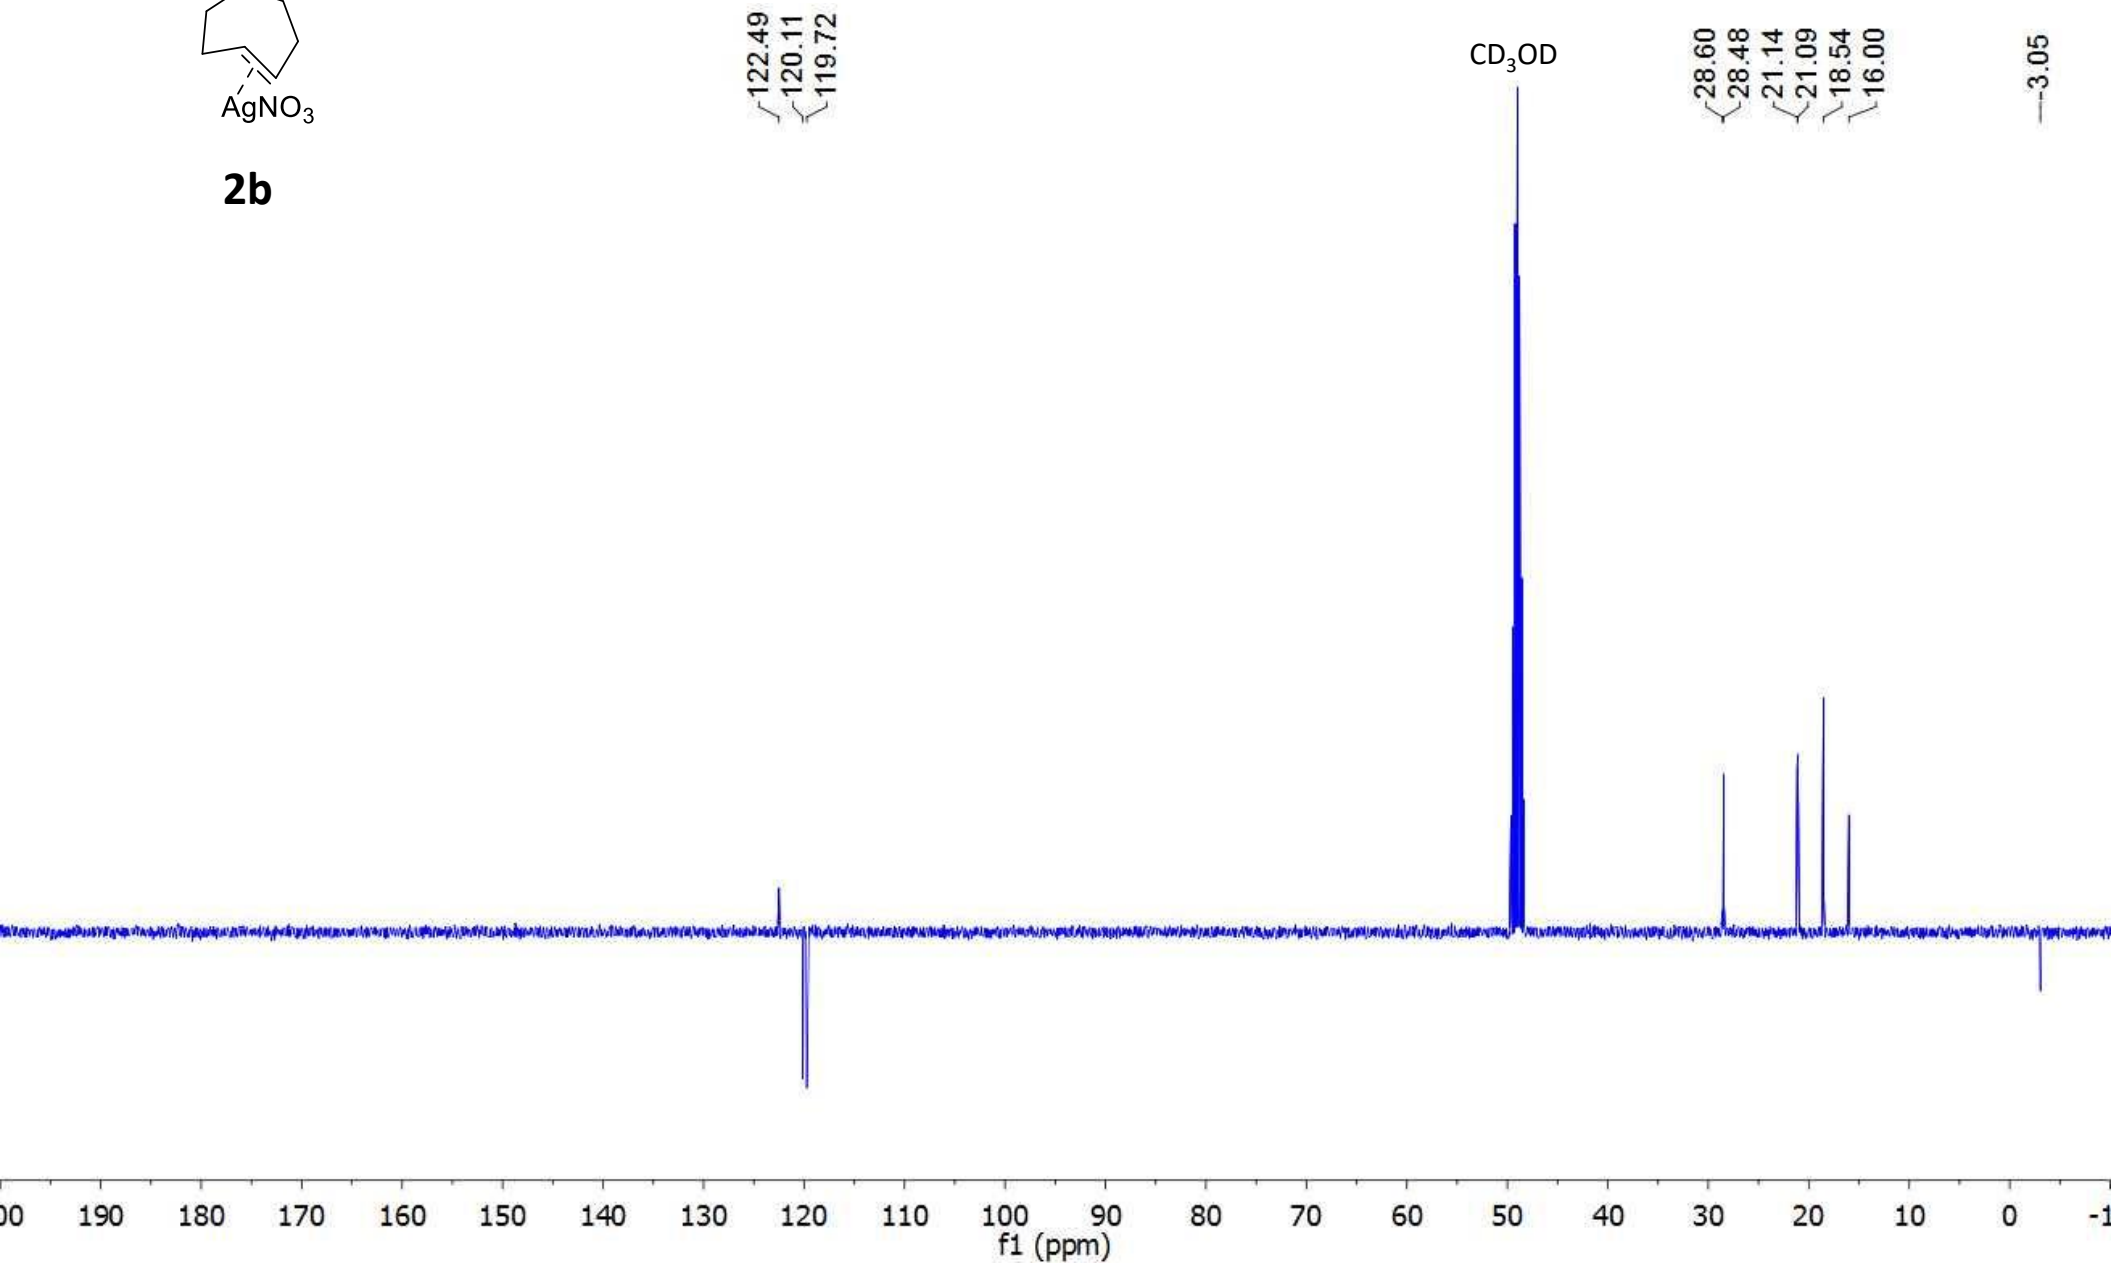

HMQC (400 MHz, CD<sub>3</sub>OD)

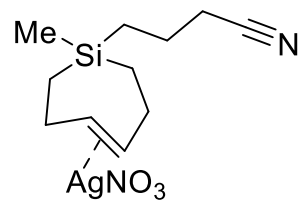

**2b**

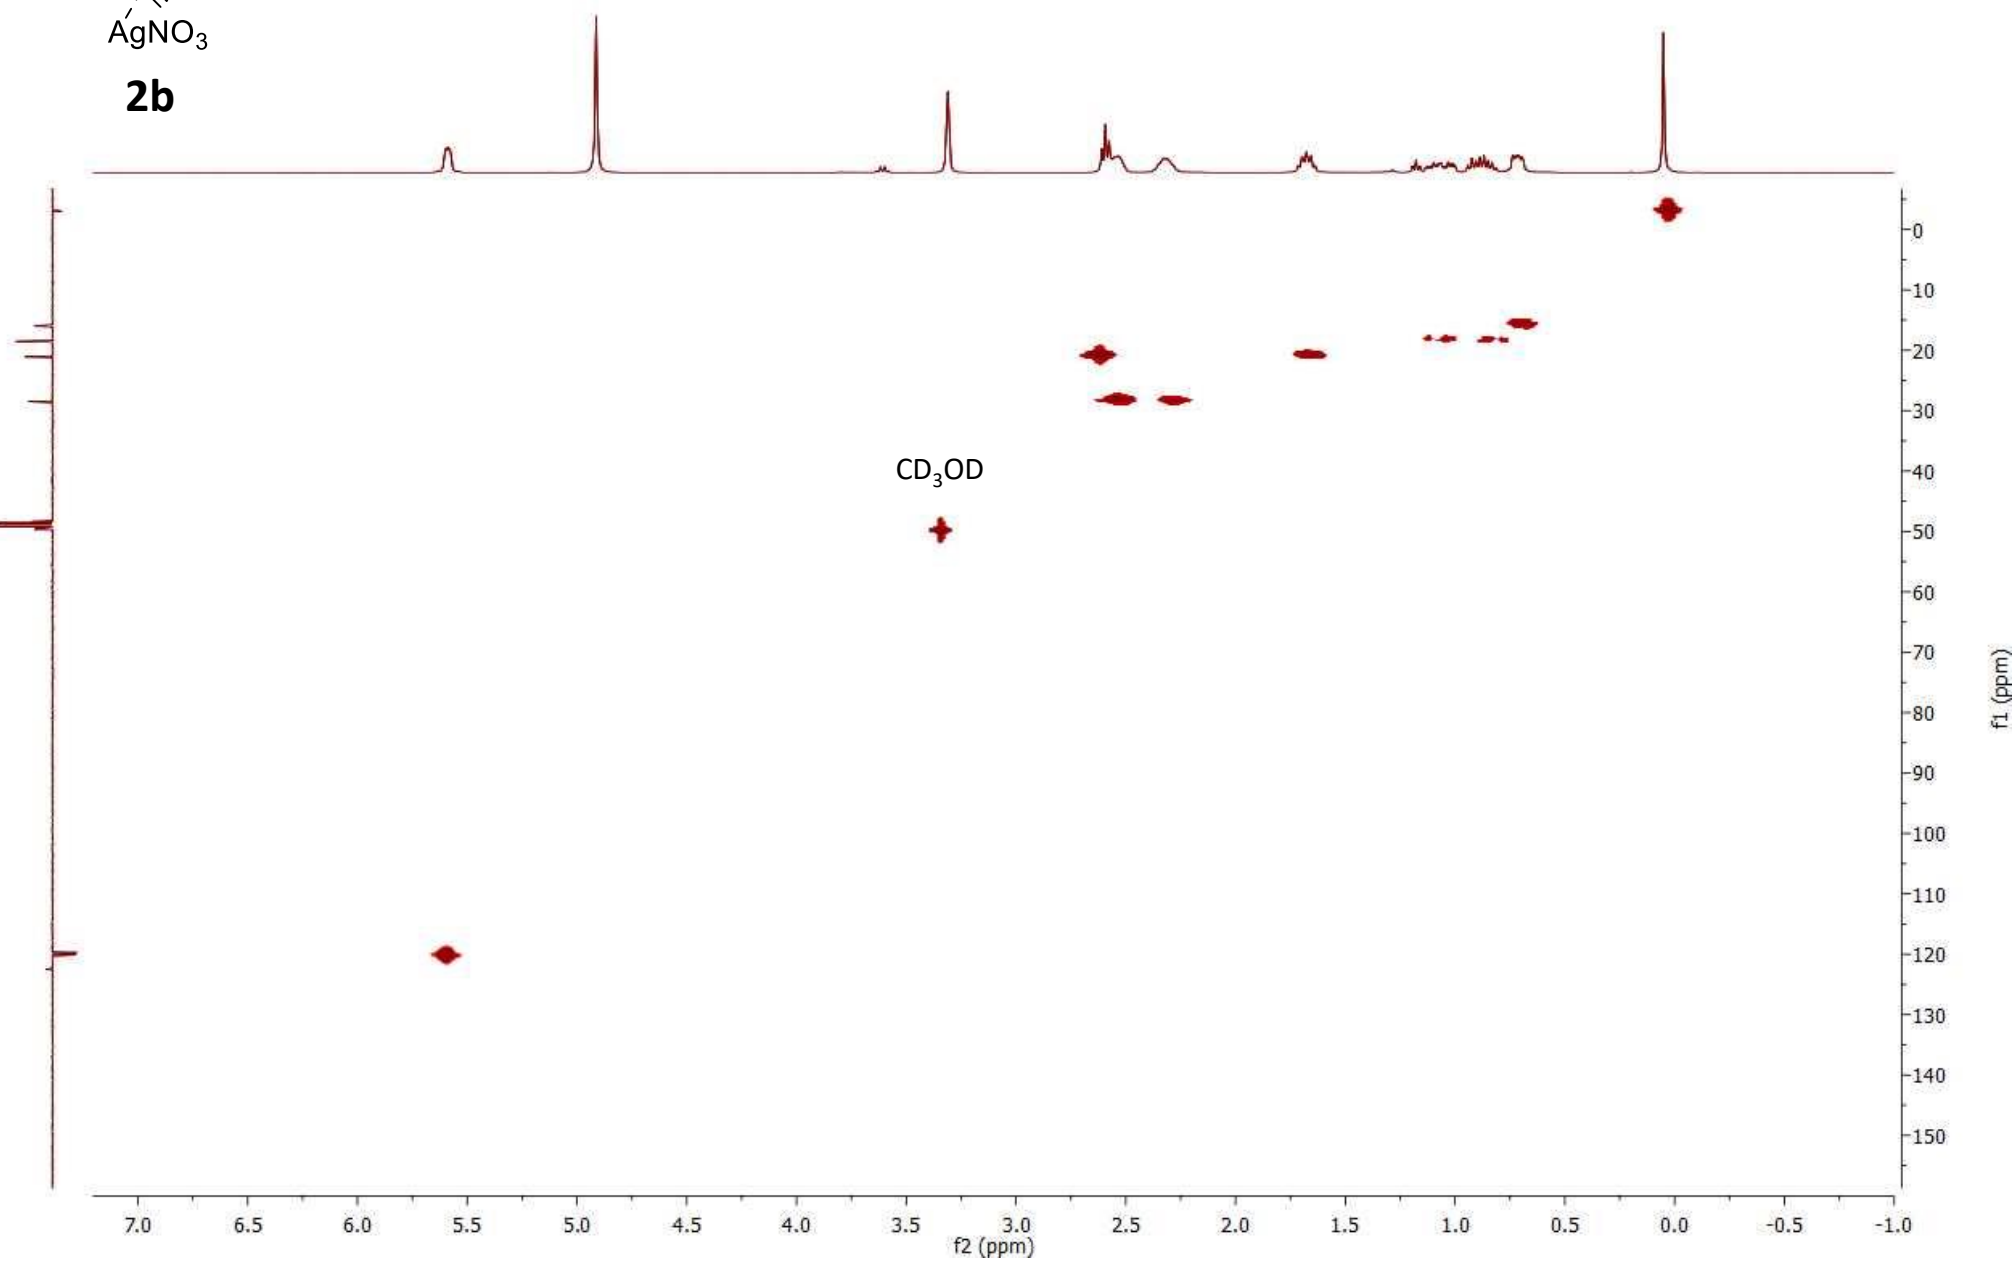

$^1\text{H}$  NMR (400 MHz,  $\text{C}_6\text{D}_6$ )

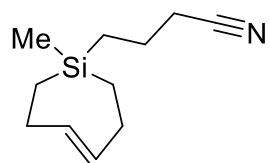

**7b** (98% trans)

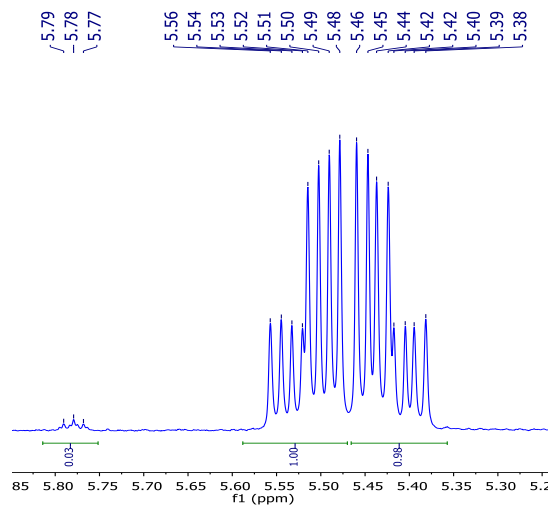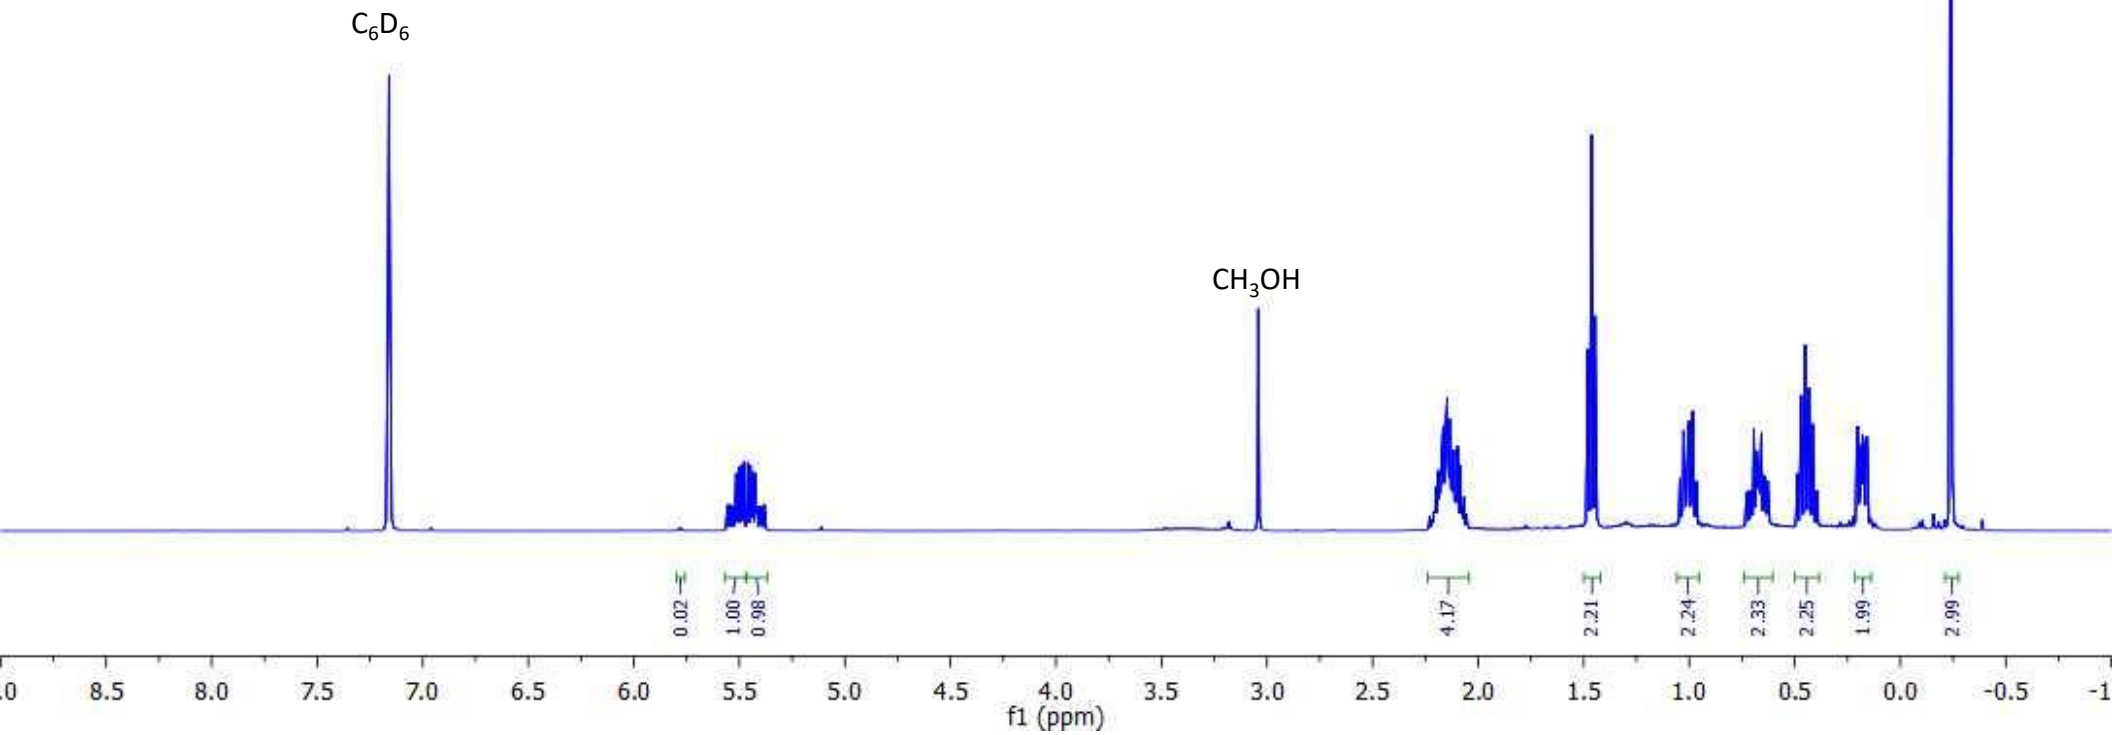

$^{13}\text{C}$  NMR (100 MHz,  $\text{C}_6\text{D}_6$ )

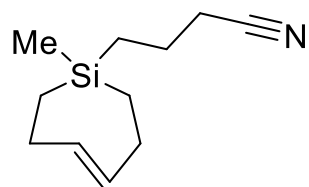

**7b** (98% trans)

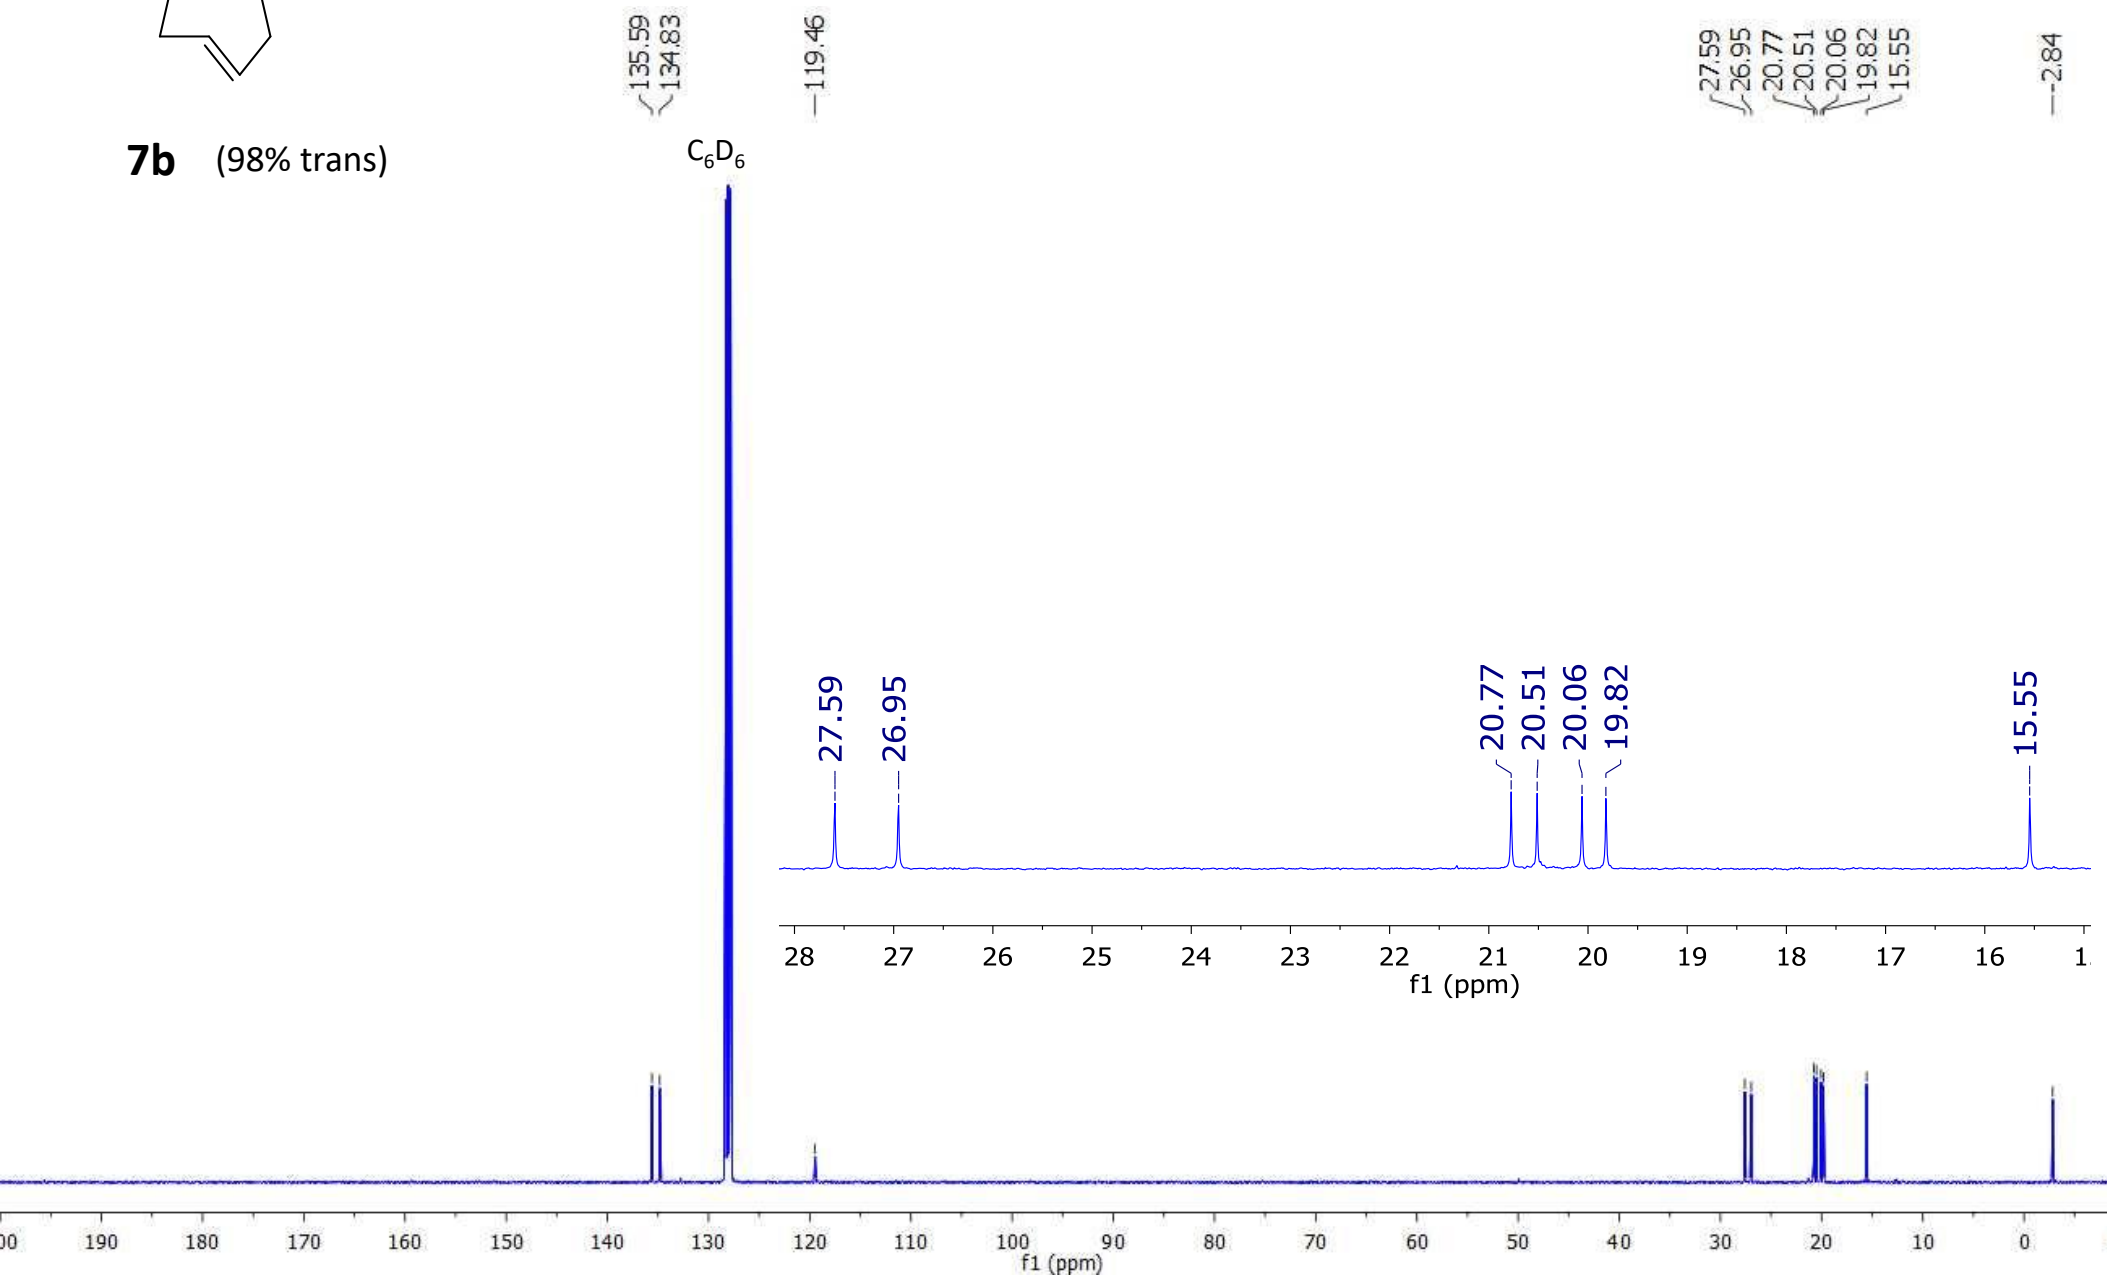

$^1\text{H}$  NMR (400 MHz,  $\text{CD}_3\text{OD}$ )

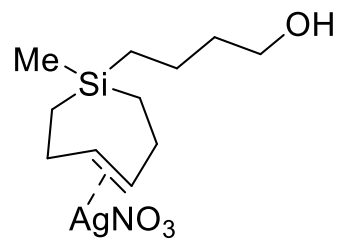

**2c**

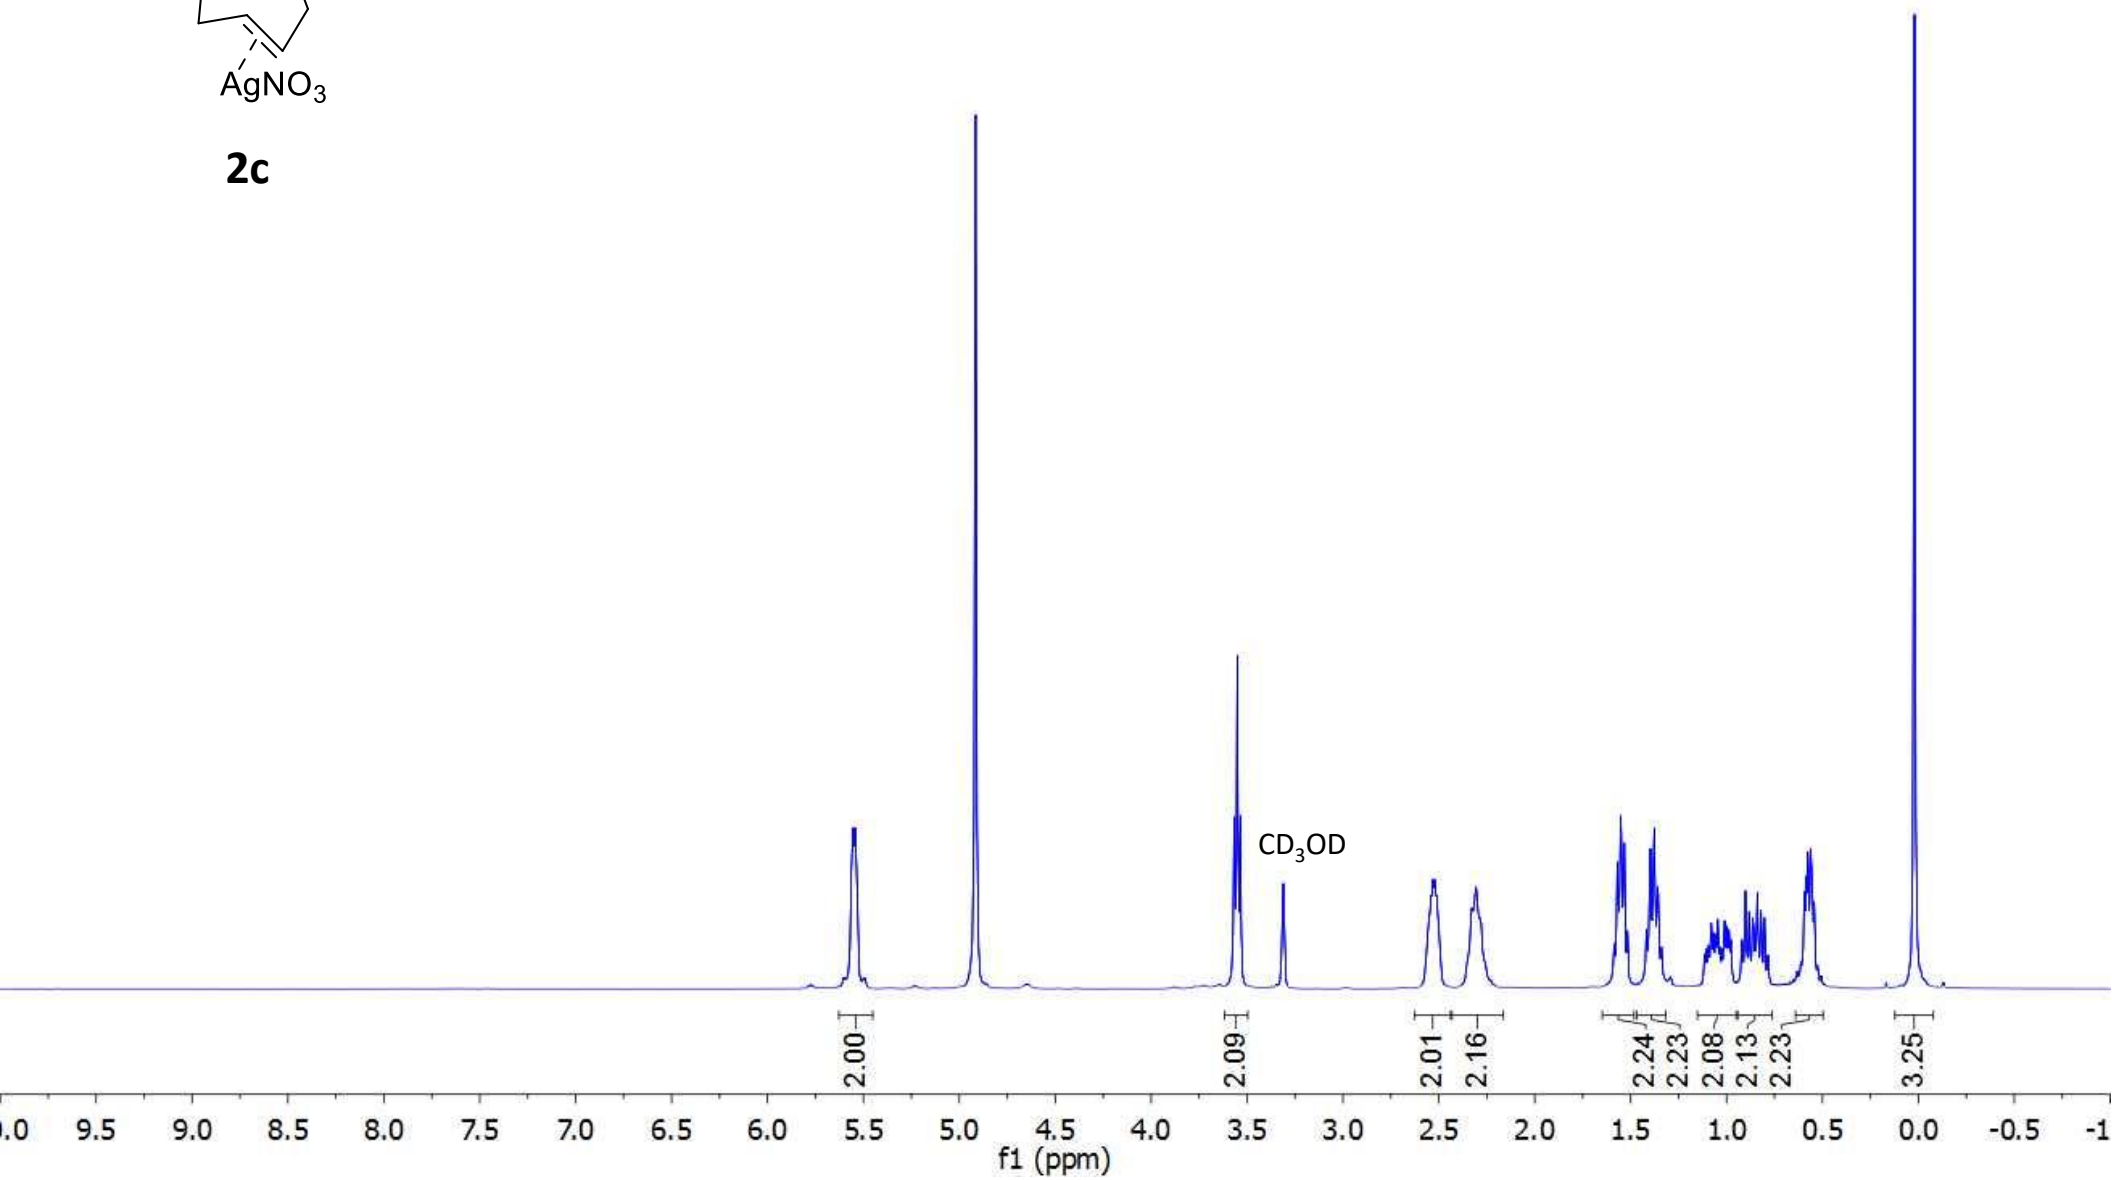

$^{13}\text{C}$  NMR (100 MHz,  $\text{CD}_3\text{OD}$ )

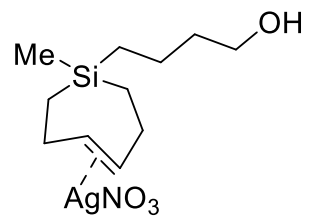

**2c**

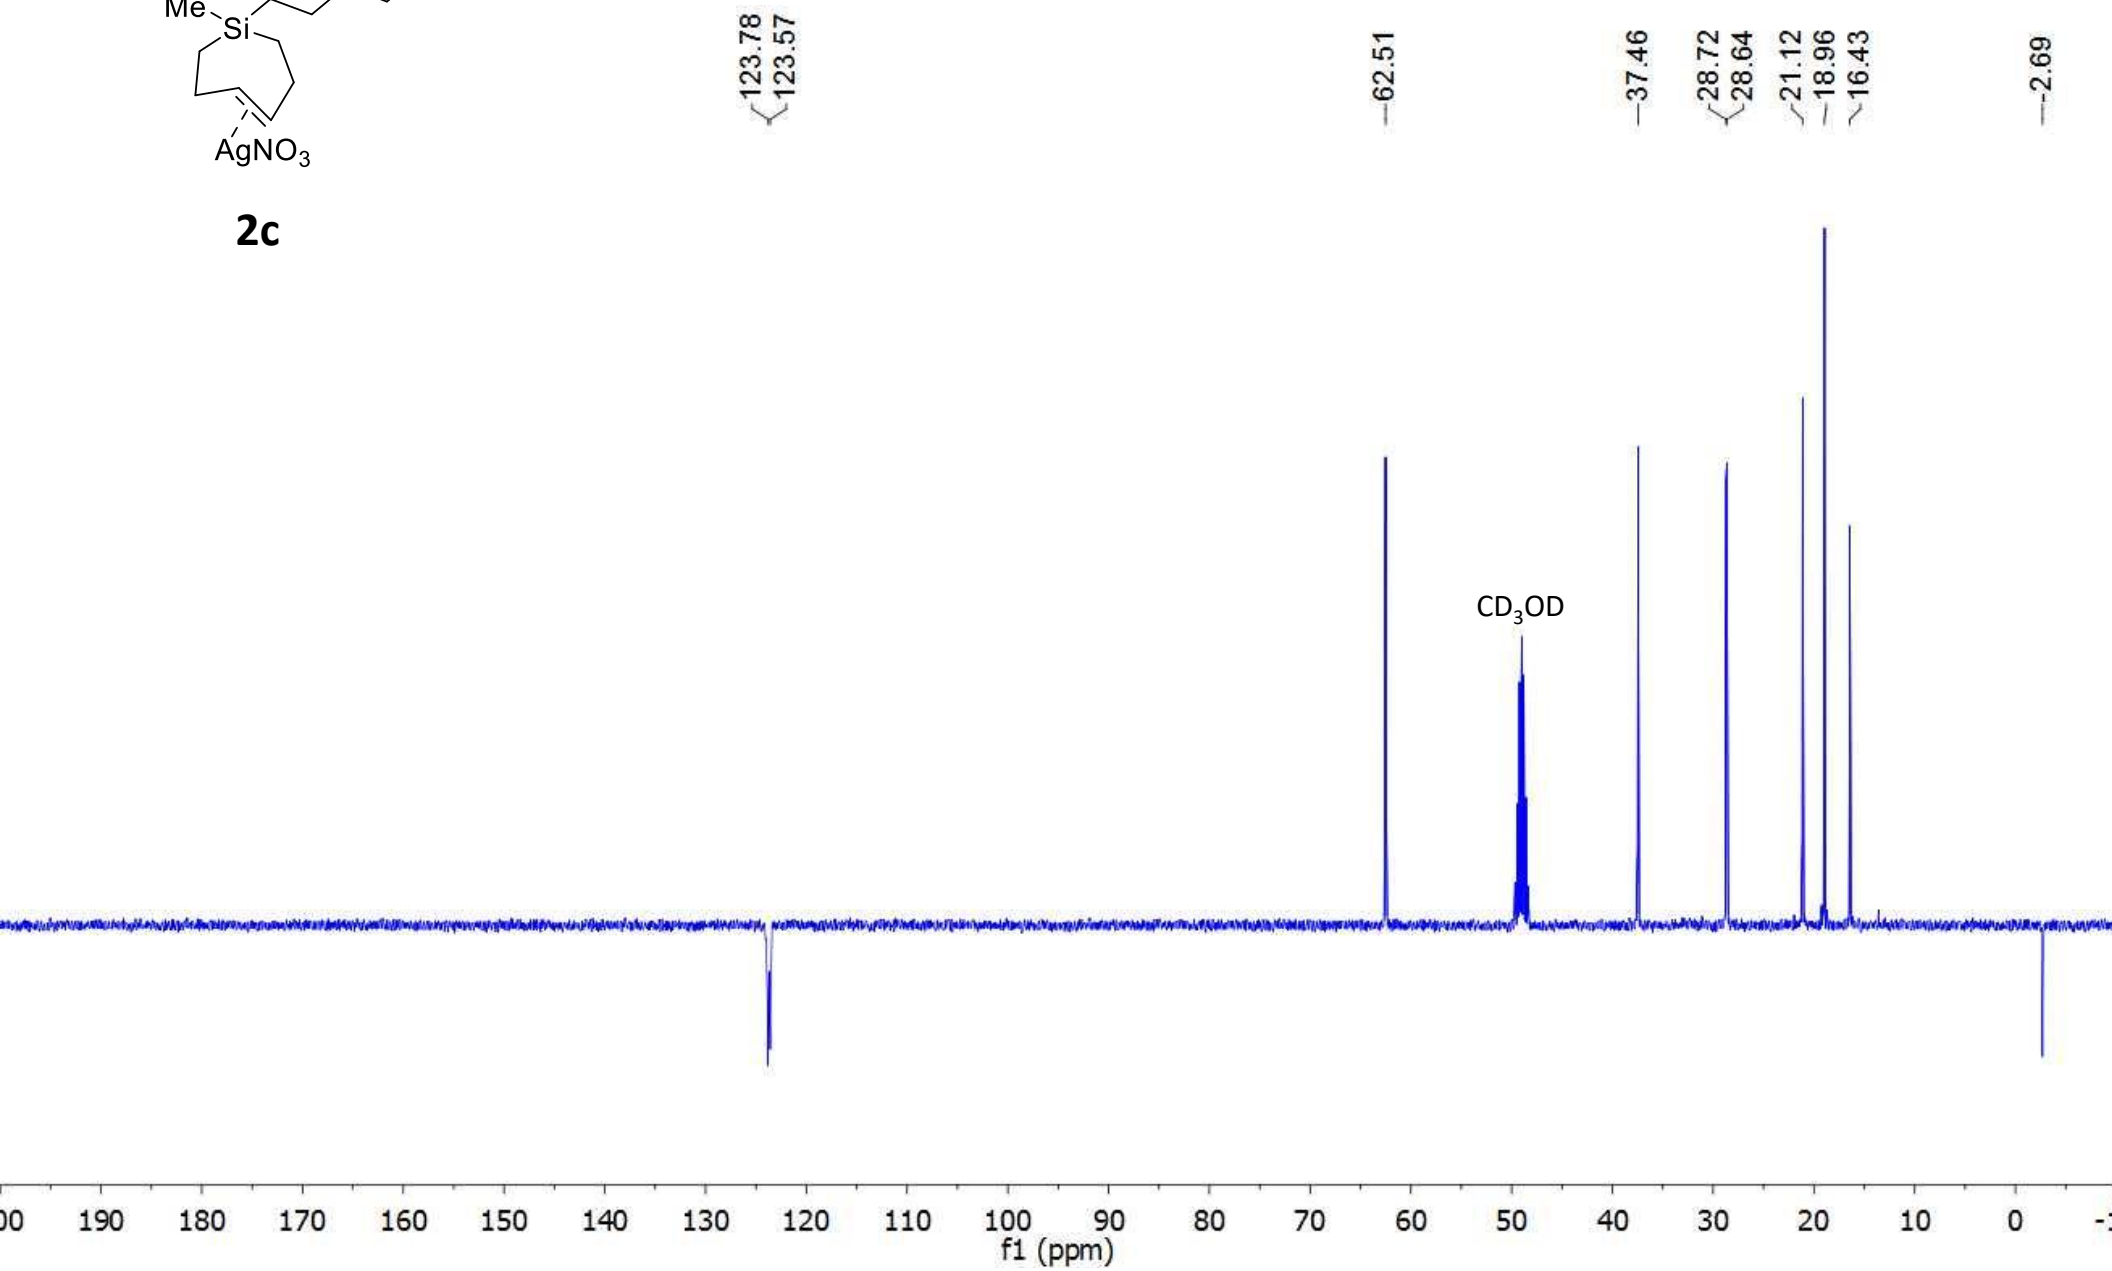





$^1\text{H}$  NMR (400 MHz,  $\text{C}_6\text{D}_6$ )

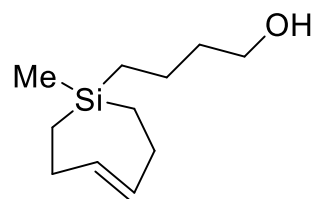

**7c** (98% trans)

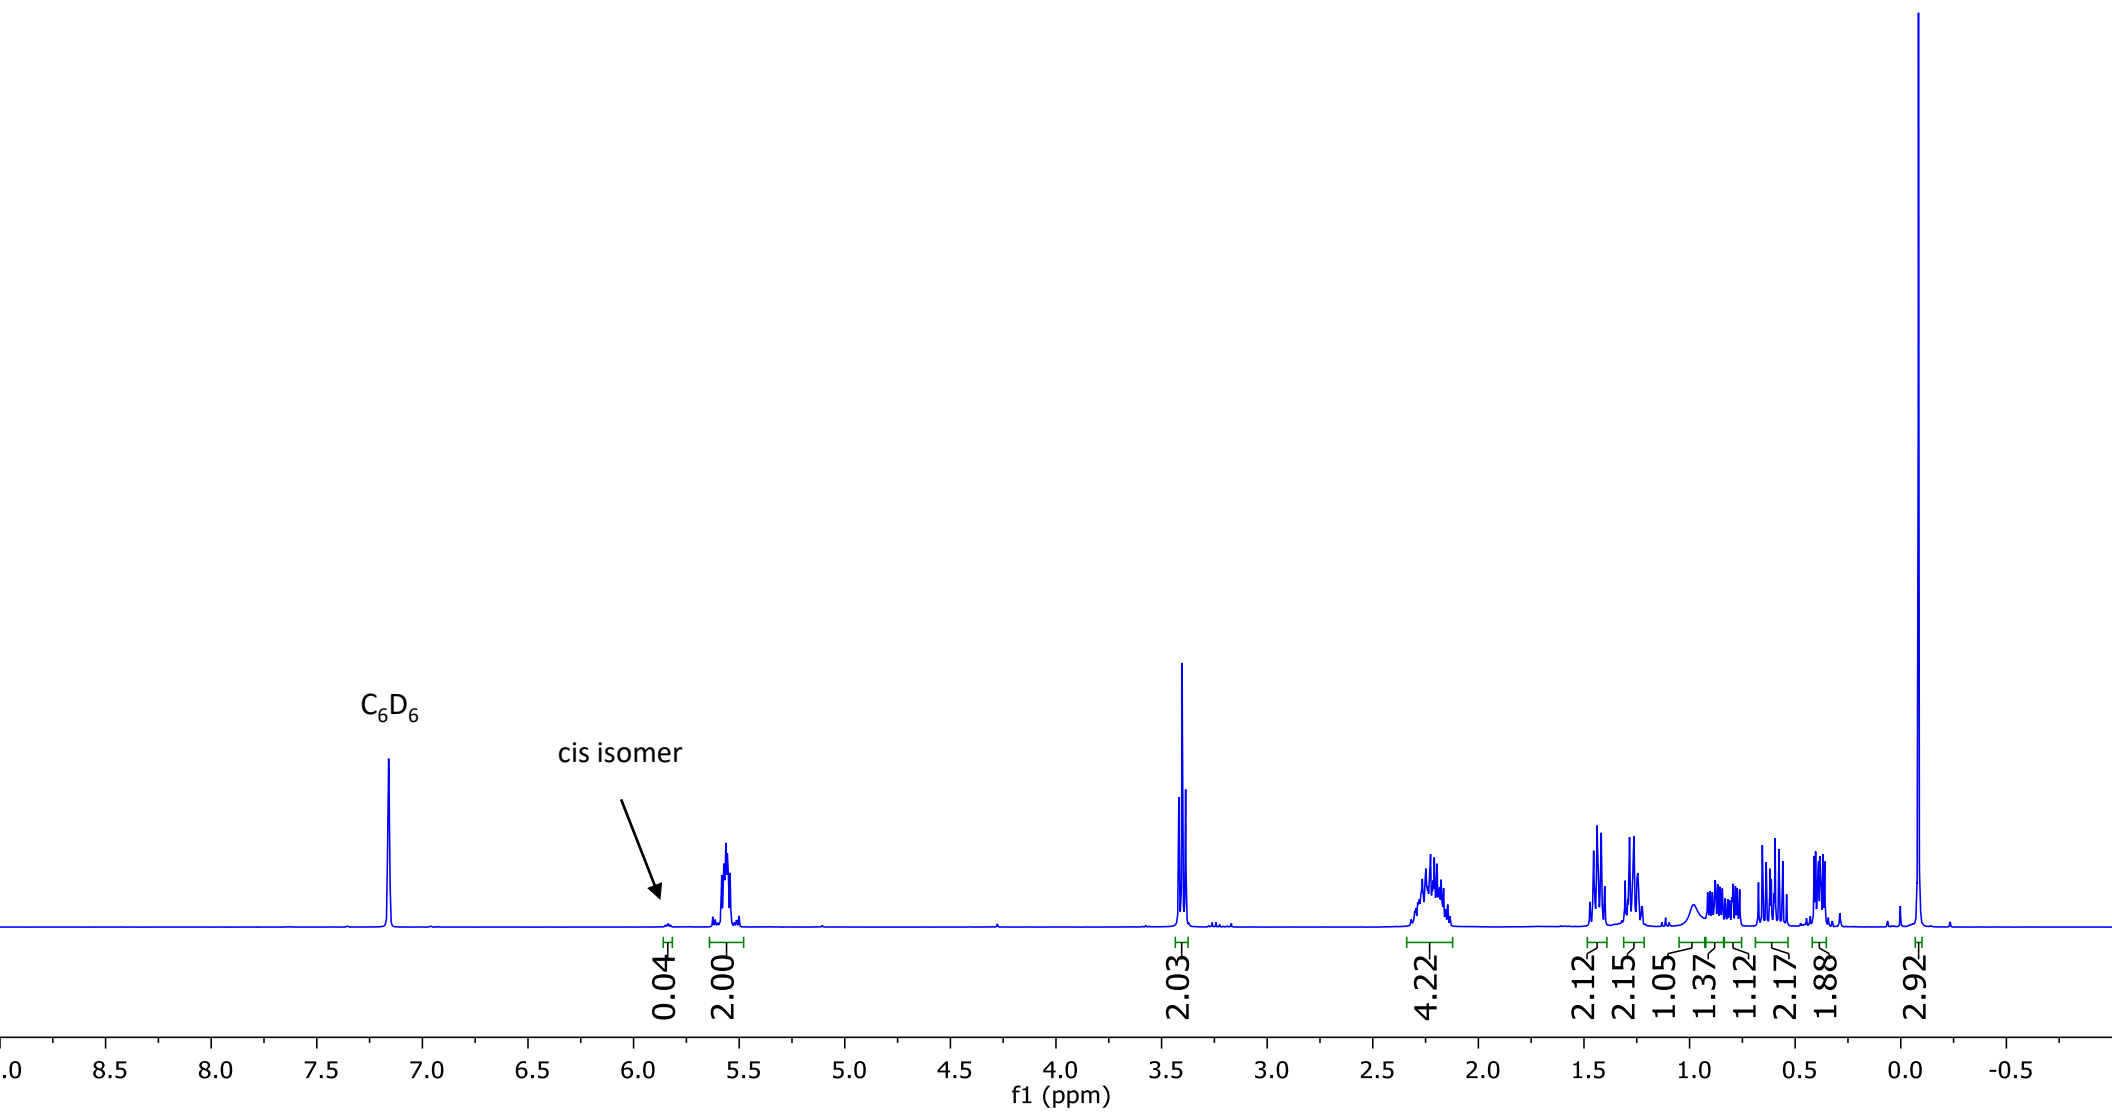

$^{13}\text{C}$  NMR (100 MHz,  $\text{C}_6\text{D}_6$ )

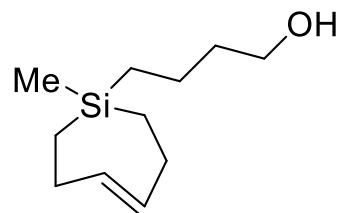

**7c** (98% trans)

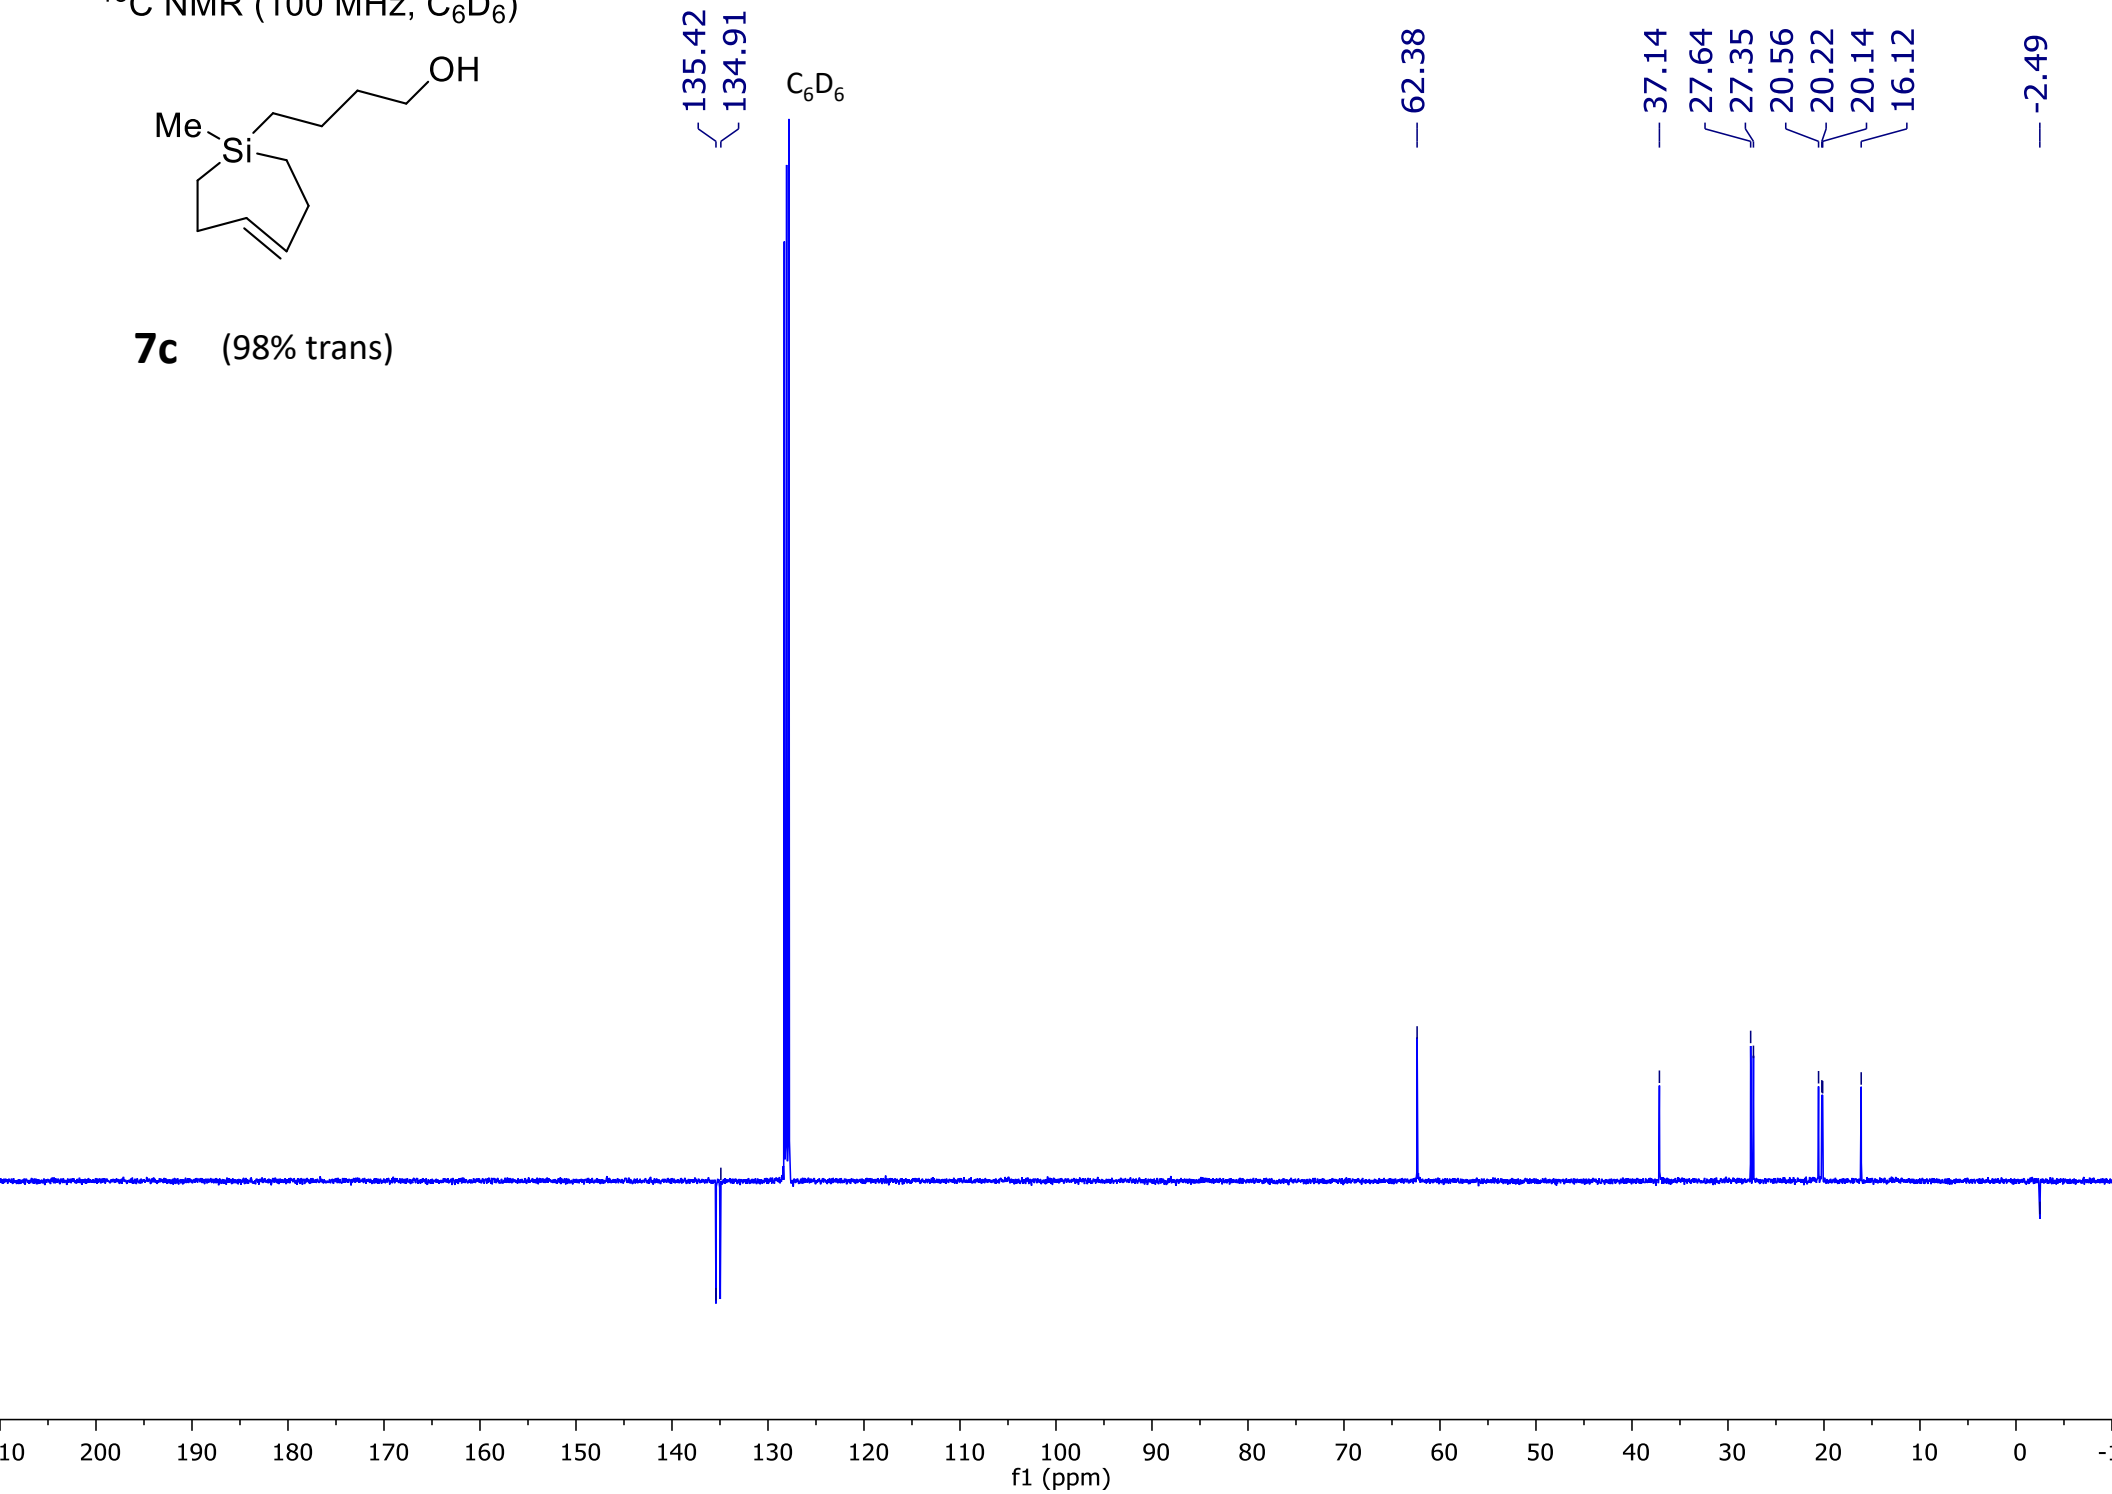

$^1\text{H}$  NMR (400 MHz,  $\text{CD}_3\text{OD}$ )

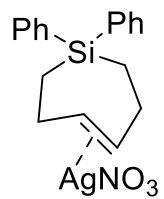

**2a**

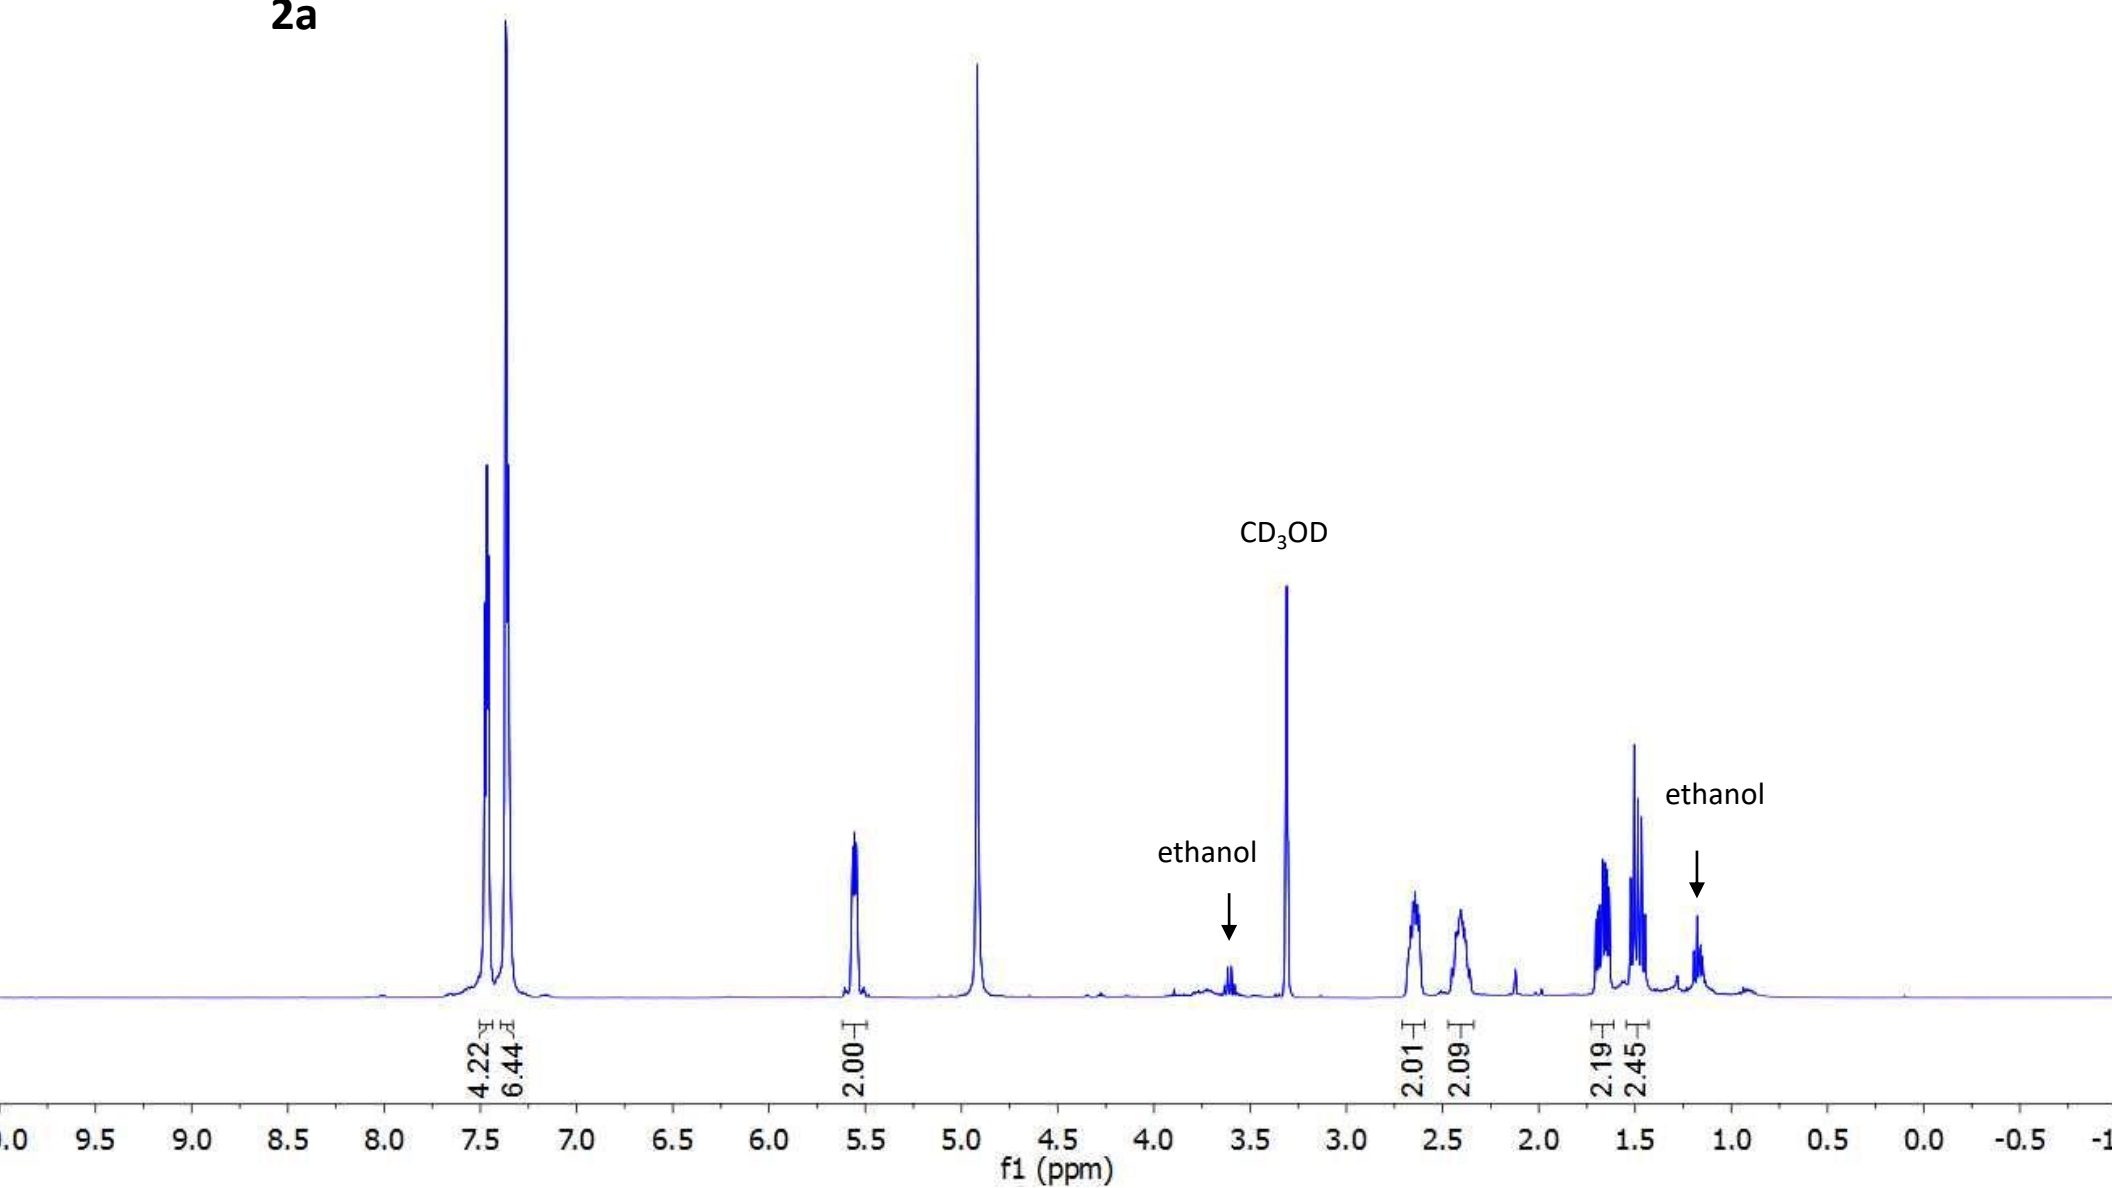

$^{13}\text{C}$  NMR (100 MHz,  $\text{CD}_3\text{OD}$ )

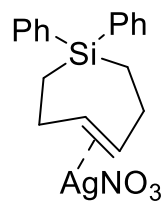

**2a**

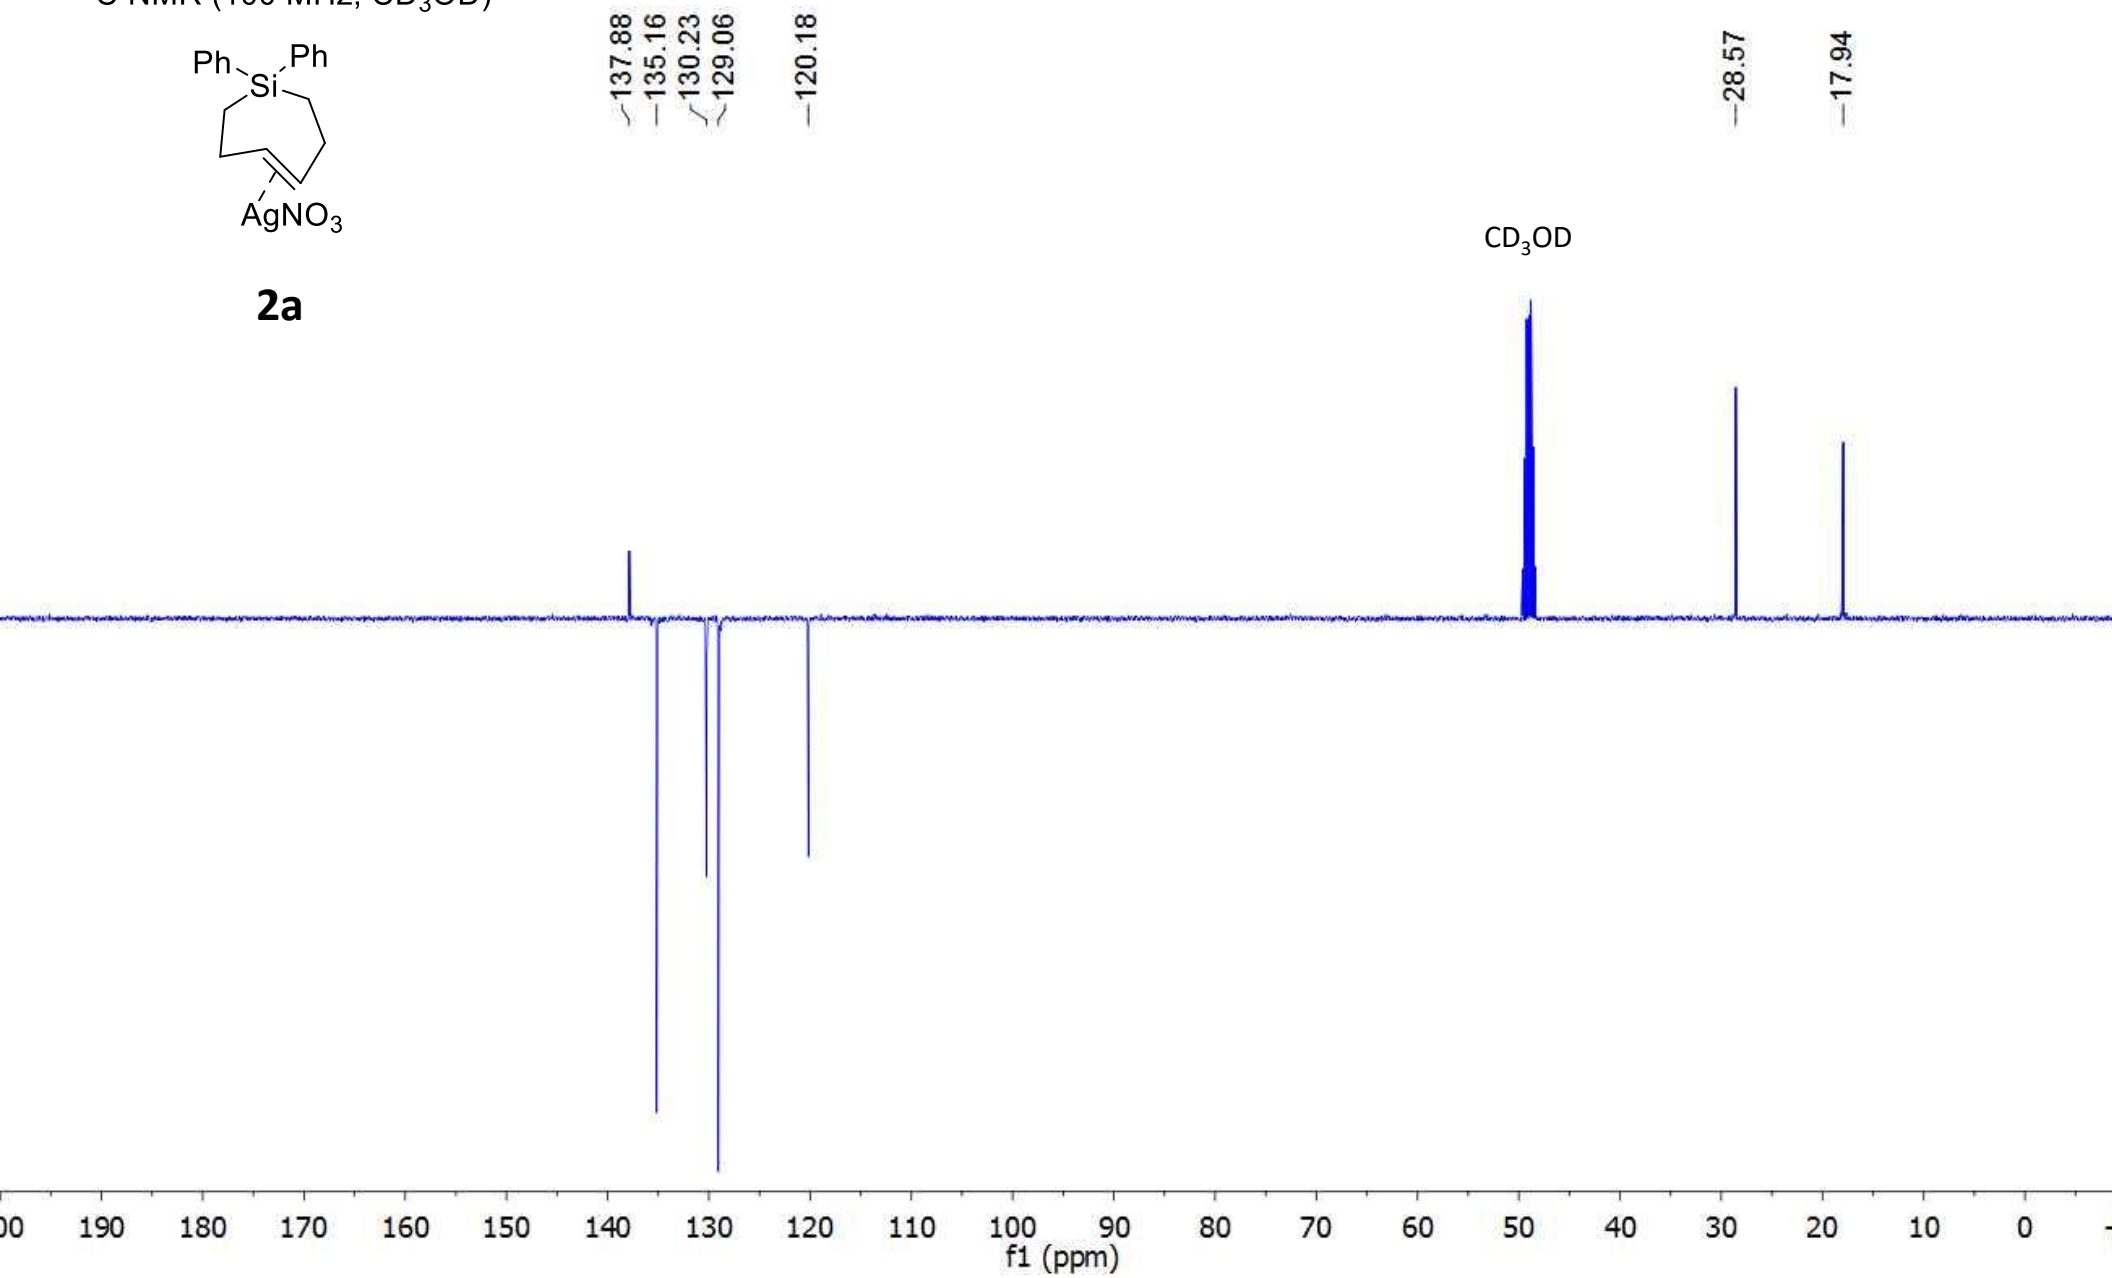

$^1\text{H}$  NMR (600 MHz,  $\text{CD}_3\text{OD}$ )

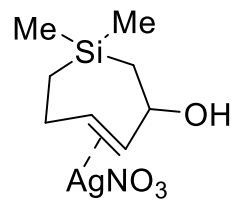

1.1: 1 dr

**2e**

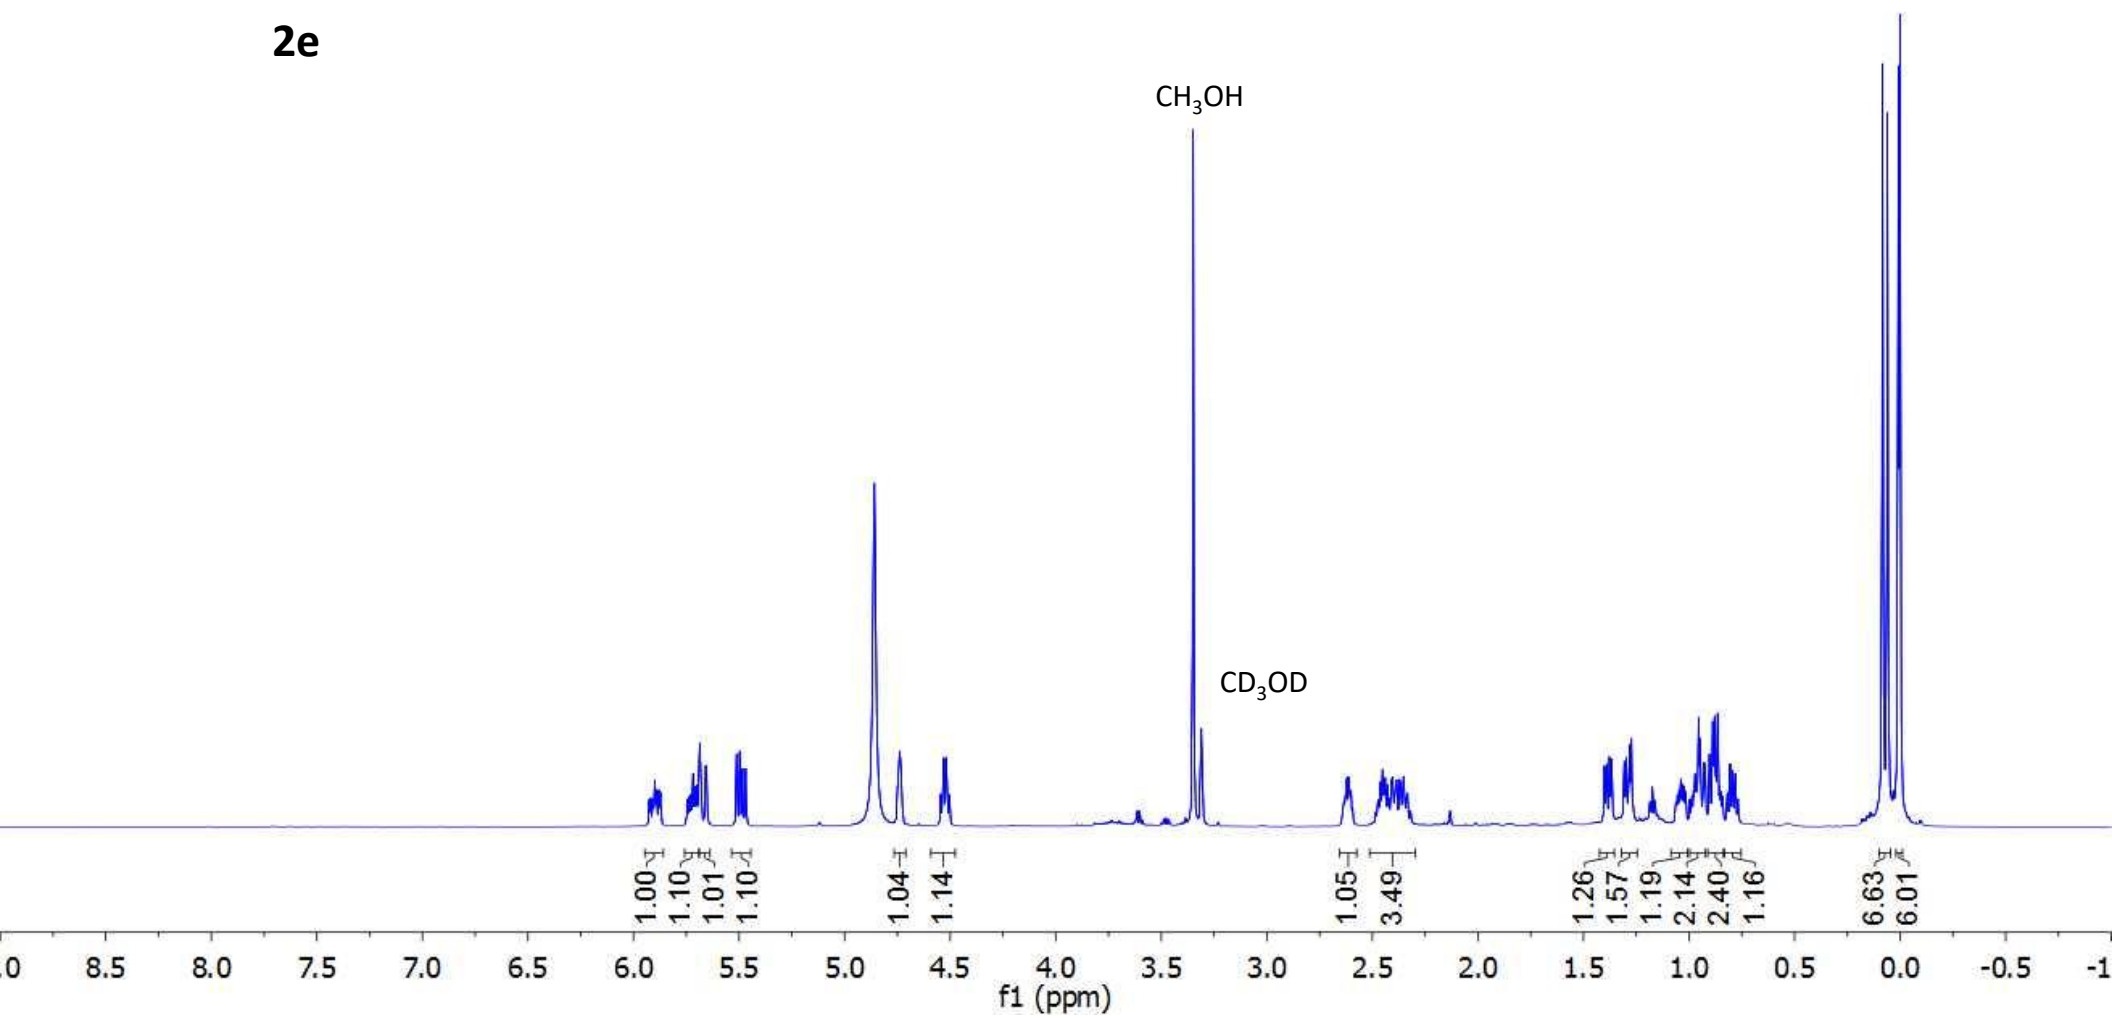

$^{13}\text{C}$  NMR (150 MHz,  $\text{CD}_3\text{OD}$ )

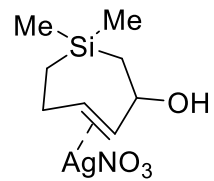

1.1: 1 dr

**2e**

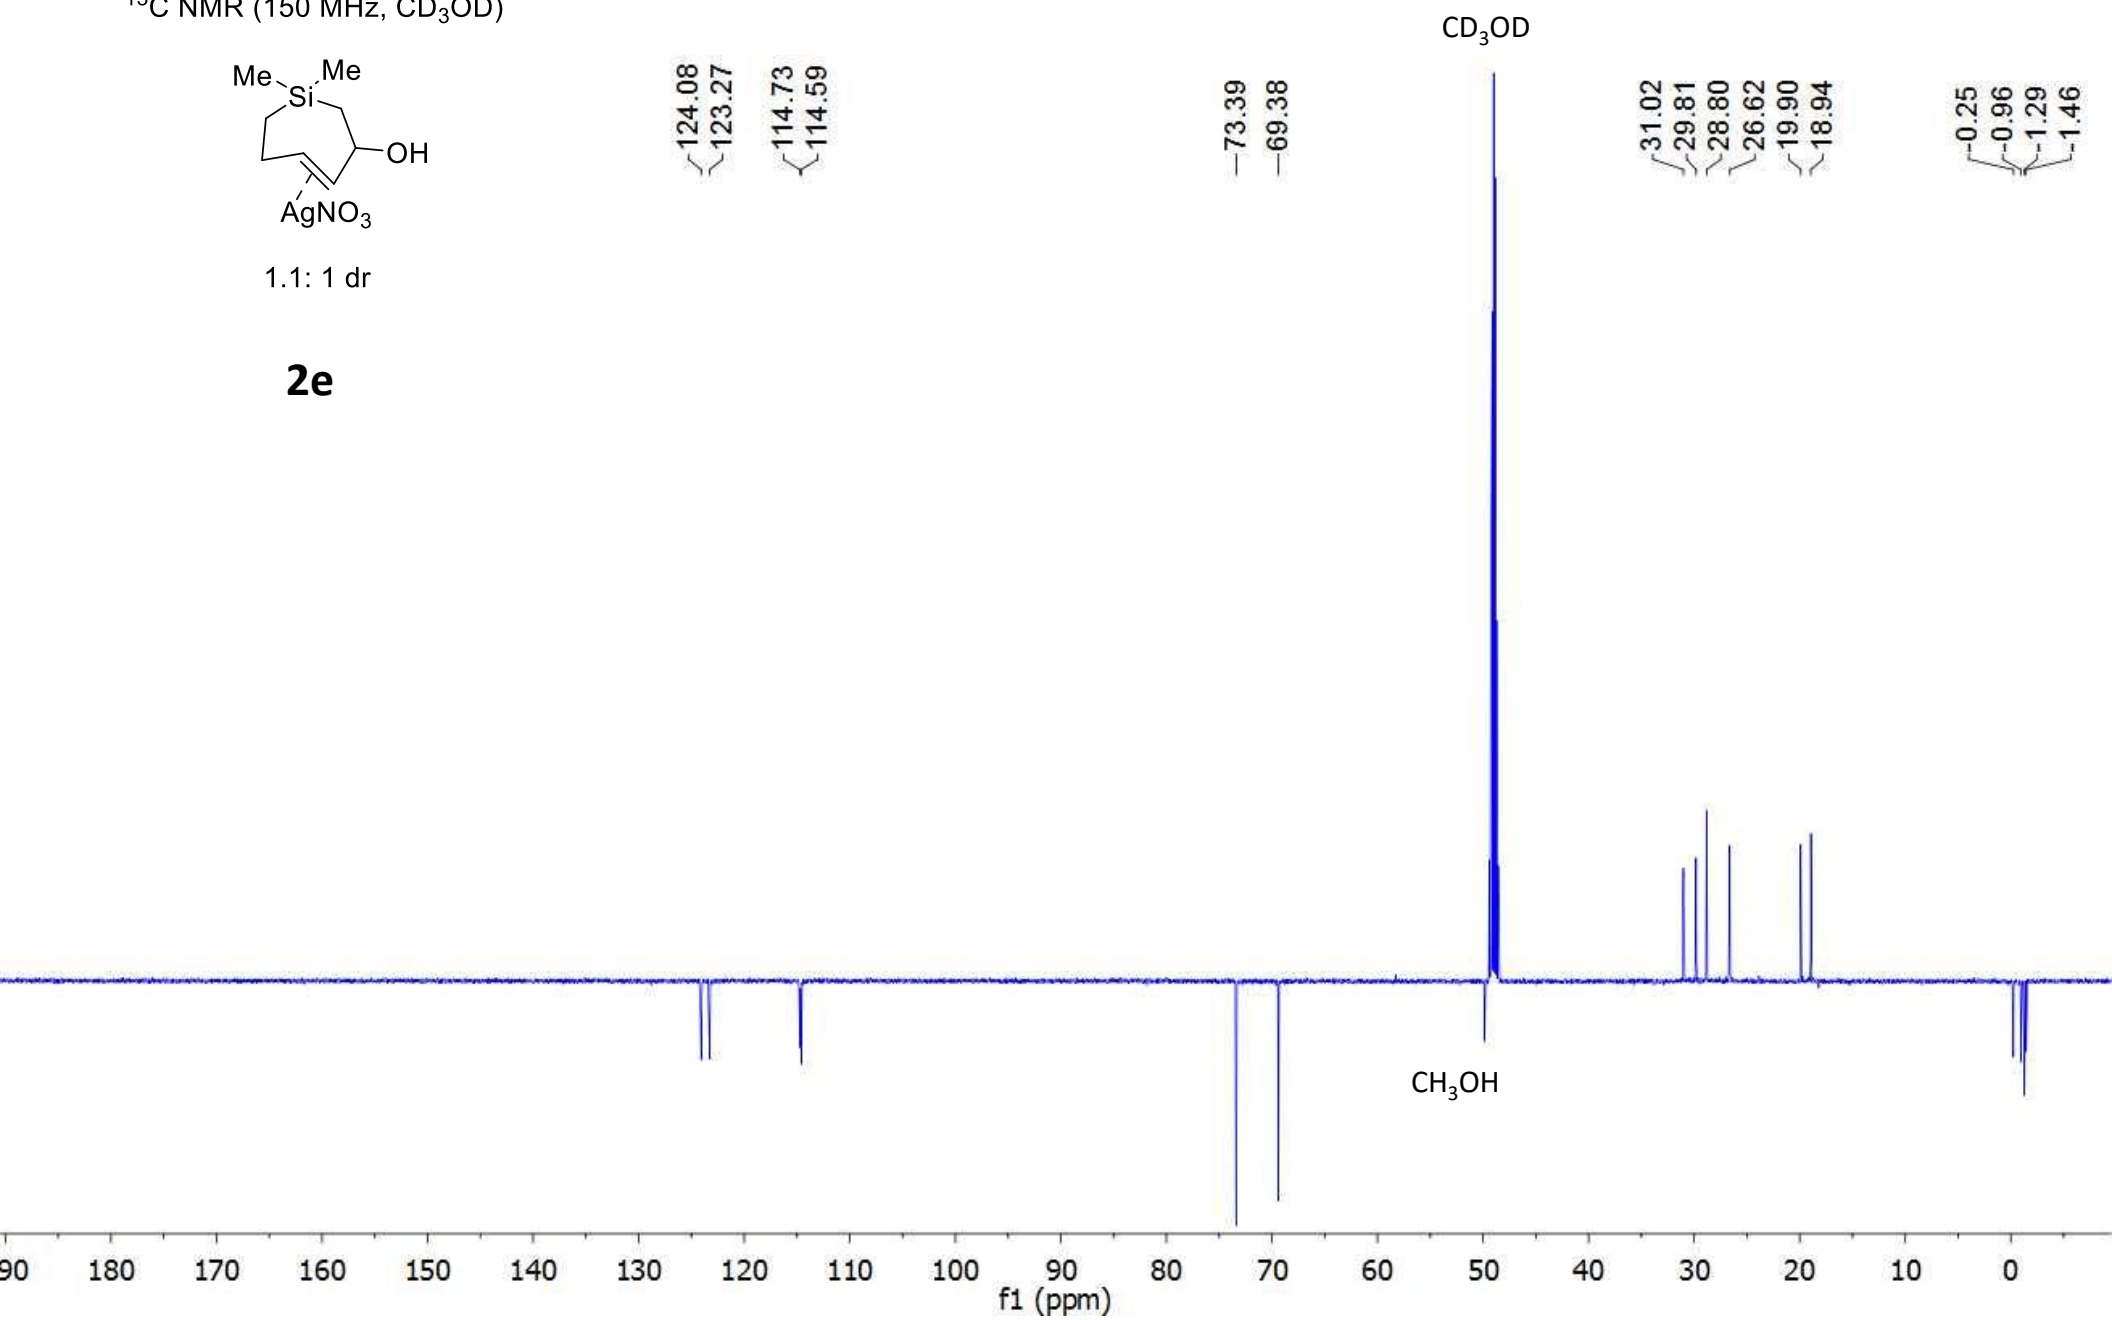

$^1\text{H}$  NMR (600 MHz,  $\text{CD}_3\text{OD}$ )

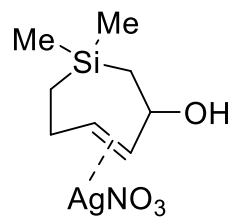

Major diastereomer

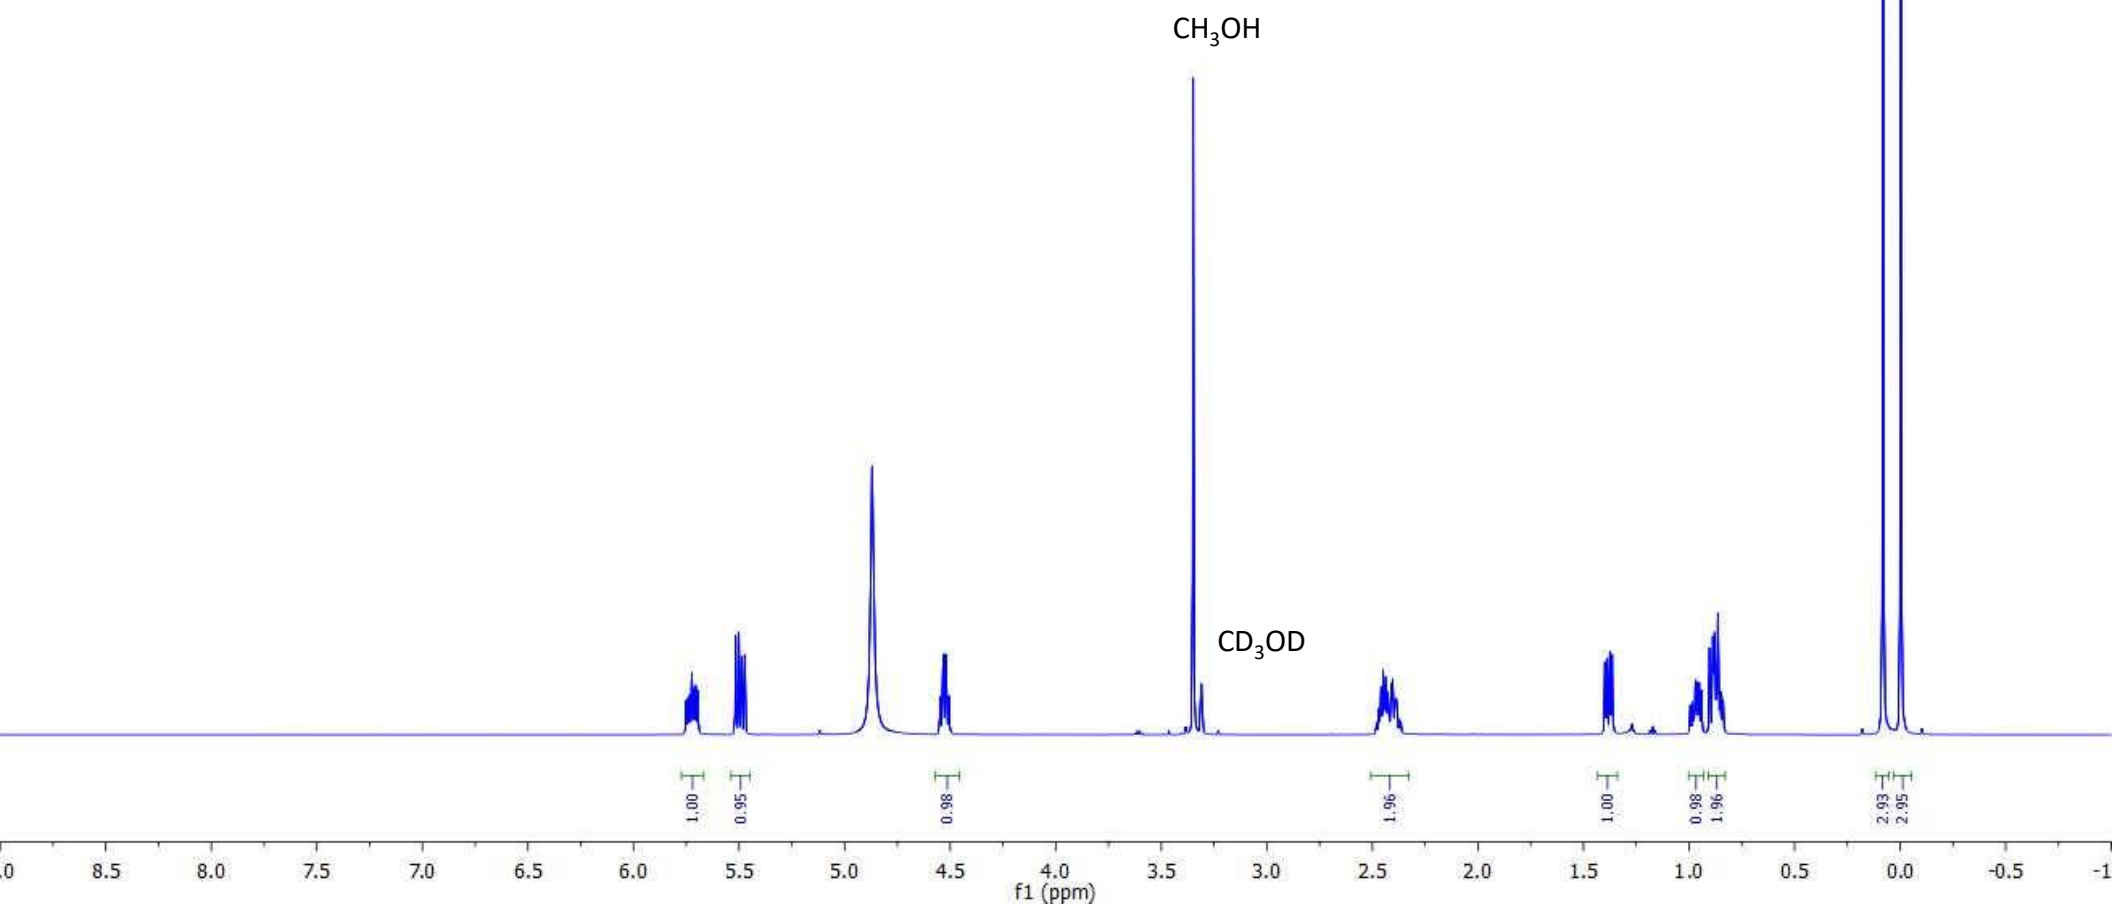



$^{13}\text{C}$  NMR (150 MHz,  $\text{CD}_3\text{OD}$ )

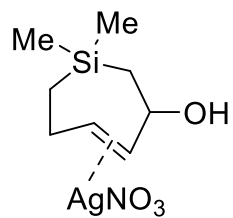

Major diastereomer

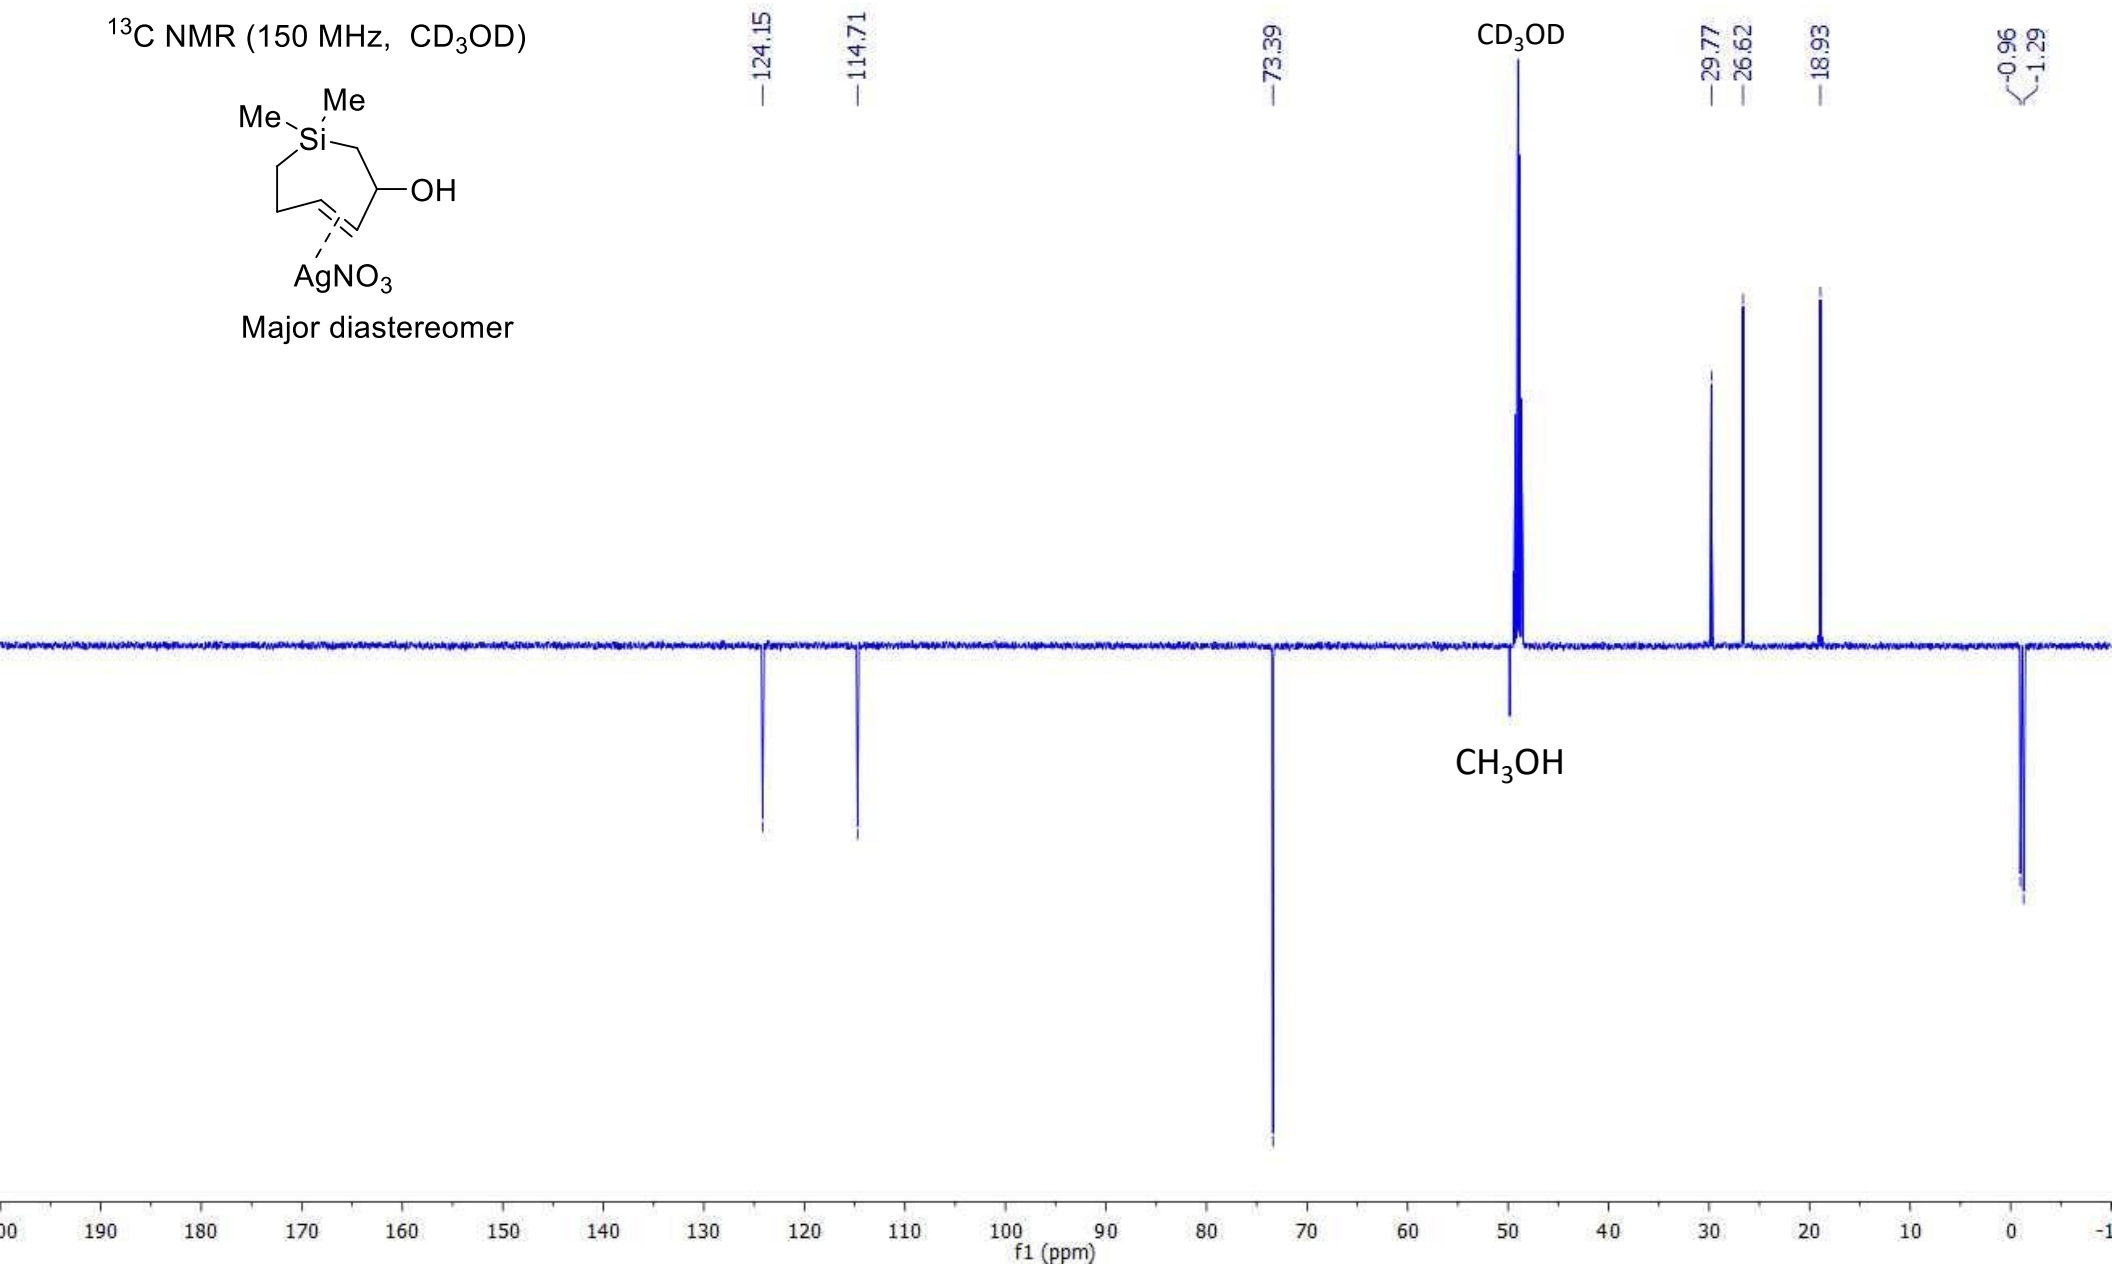

$^1\text{H}$  NMR (600 MHz,  $\text{CD}_3\text{OD}$ )

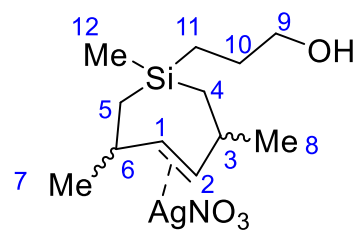

**2d**

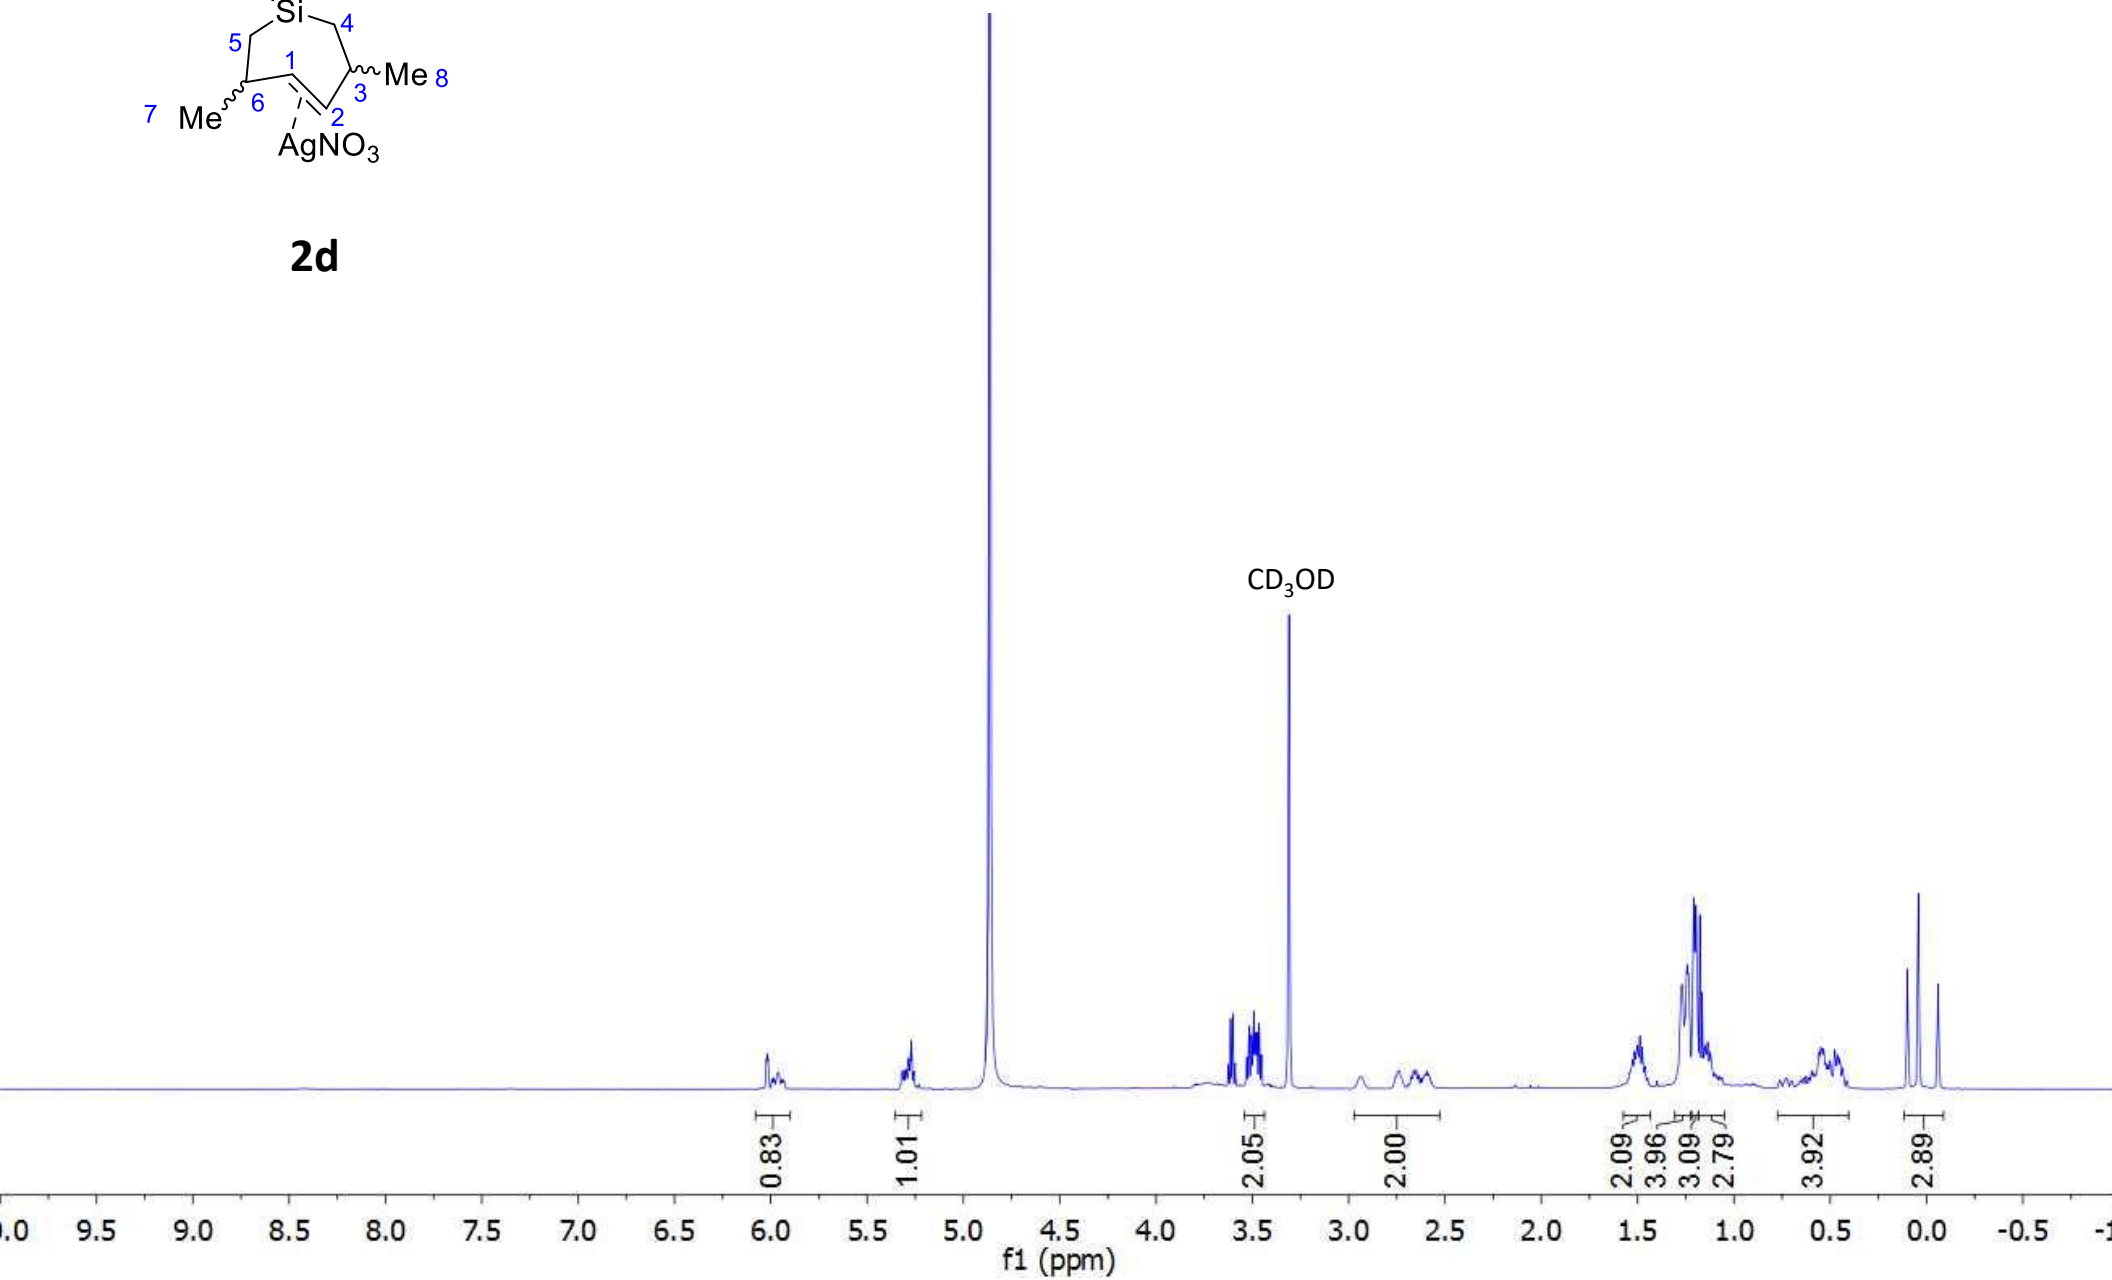

$^{13}\text{C}$  NMR (100 MHz,  $\text{CD}_3\text{OD}$ )

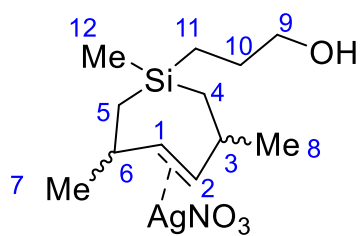

**2d**

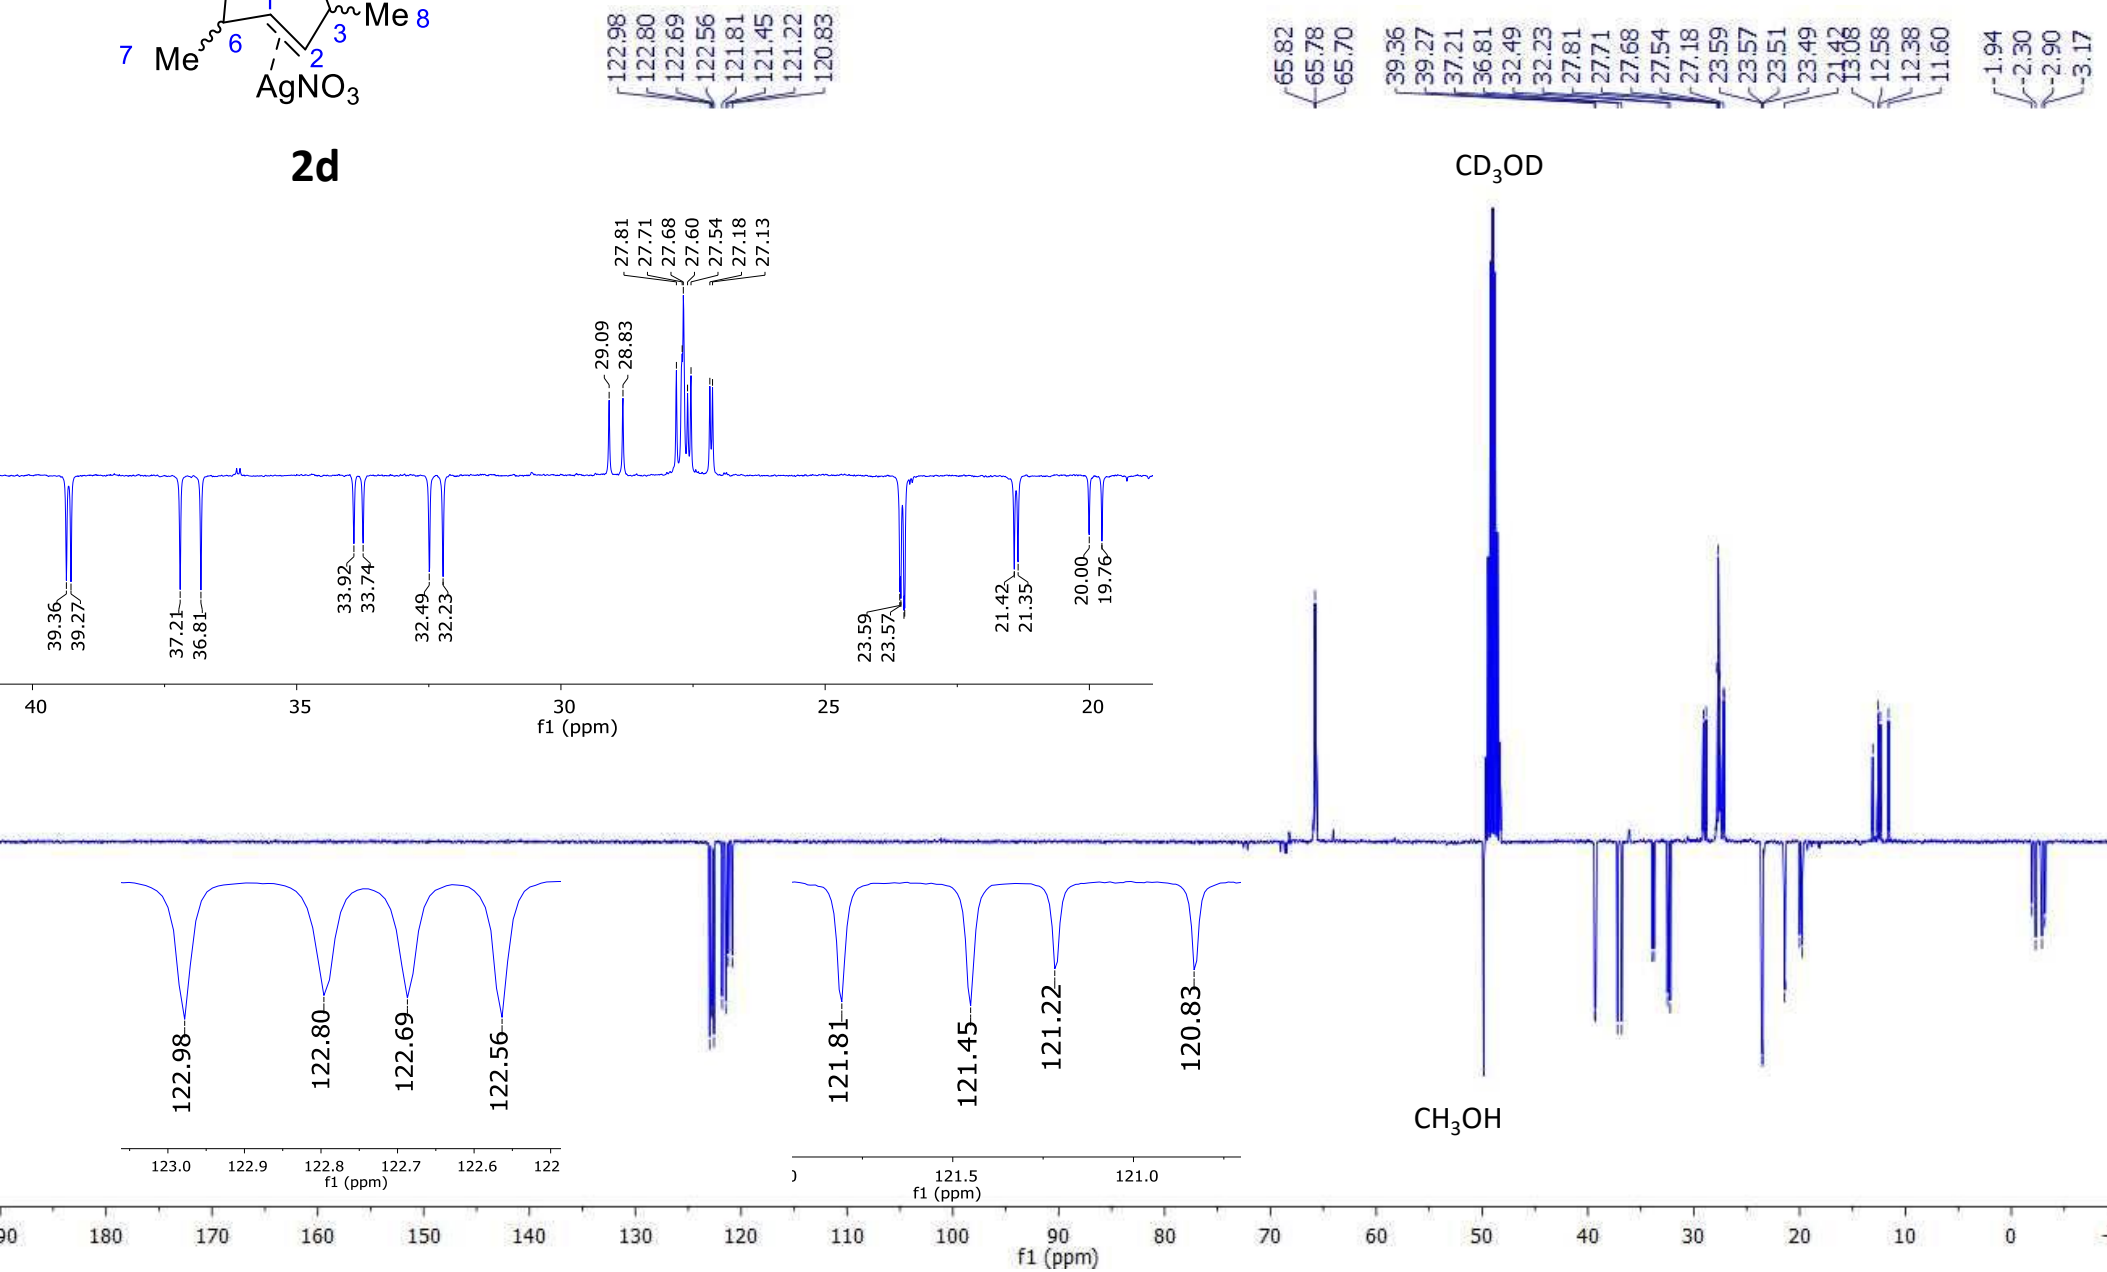

$^1\text{H}$  NMR (600 MHz,  $\text{C}_6\text{D}_6$ )

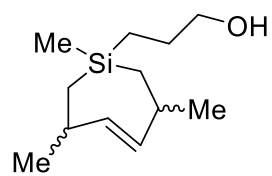

**7d**

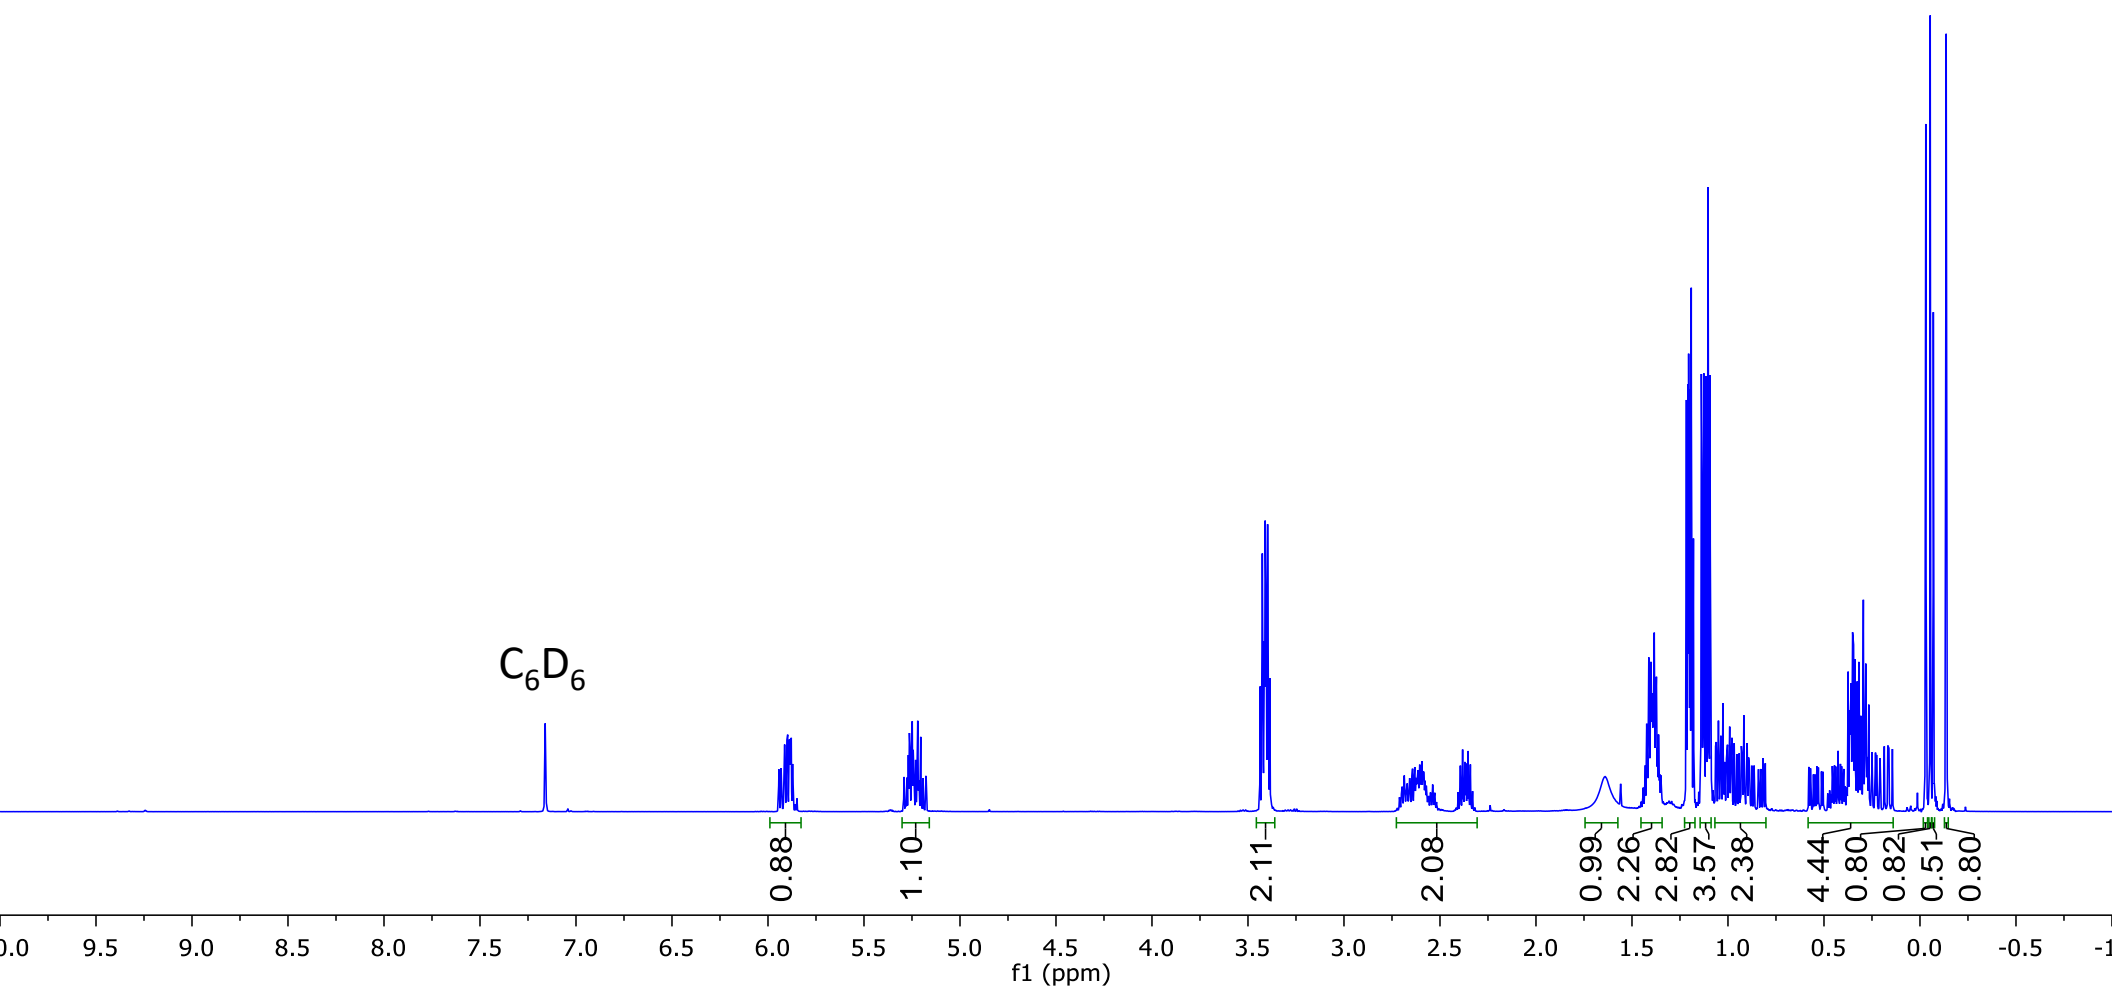

<sup>13</sup>C NMR (150 MHz, C<sub>6</sub>D<sub>6</sub>)

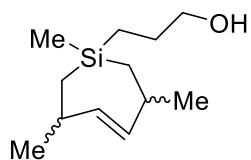

**7d**

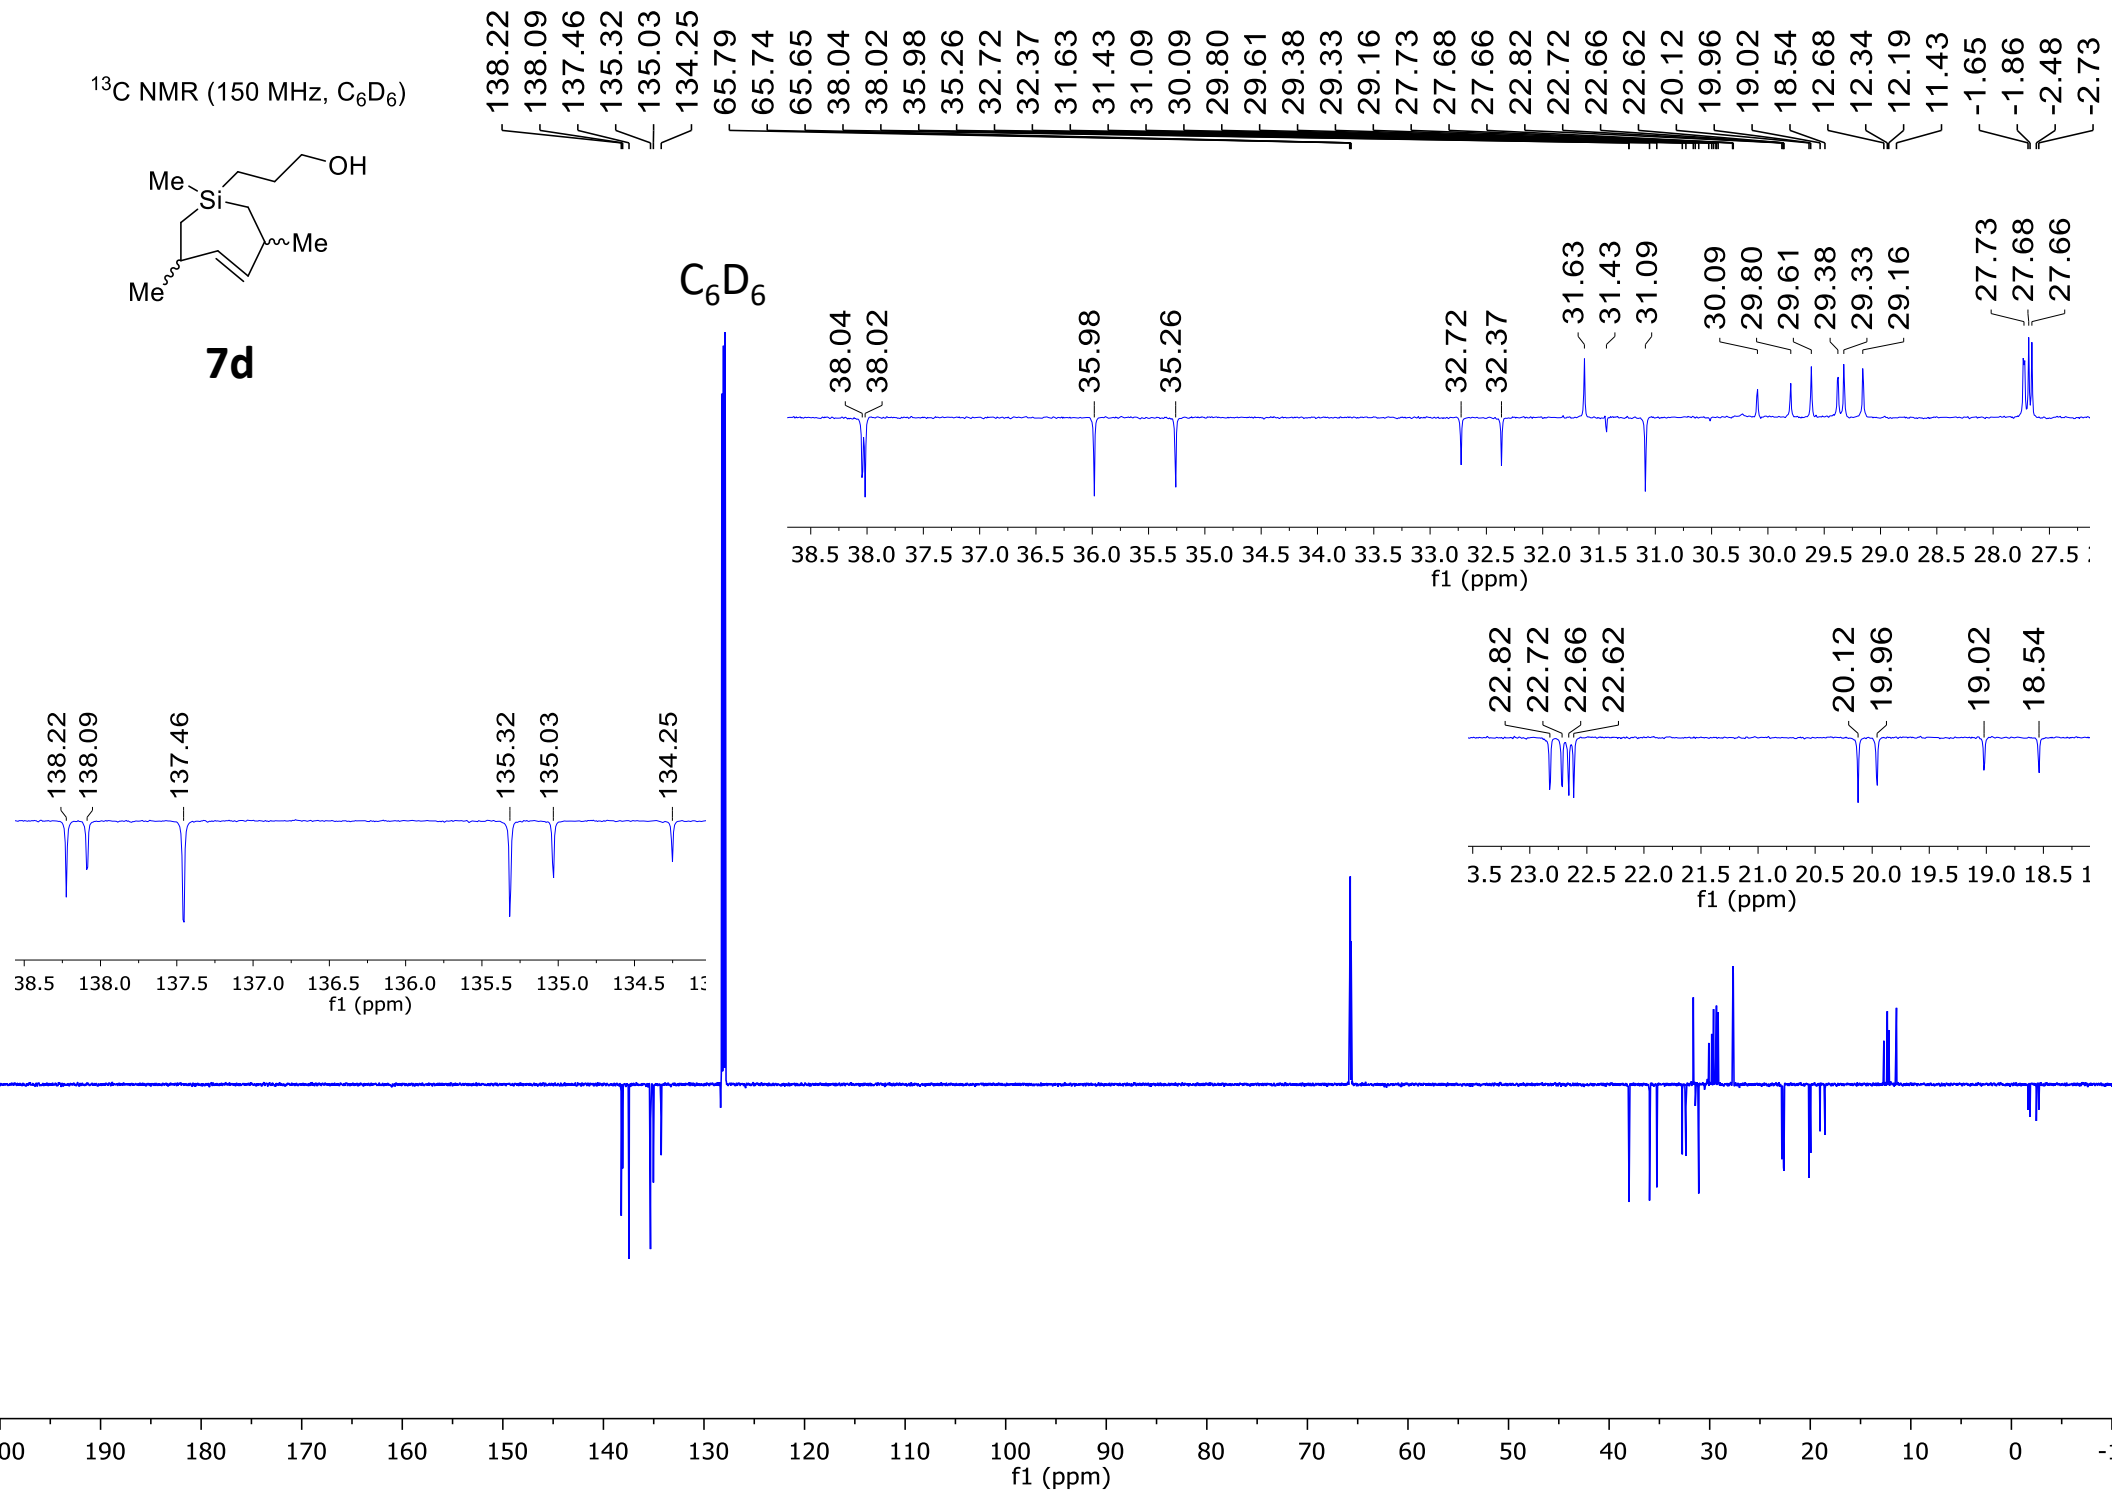

$^1\text{H}$  NMR (400 MHz,  $\text{CD}_3\text{CN}$ )

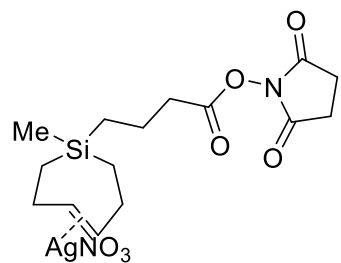

**2f**

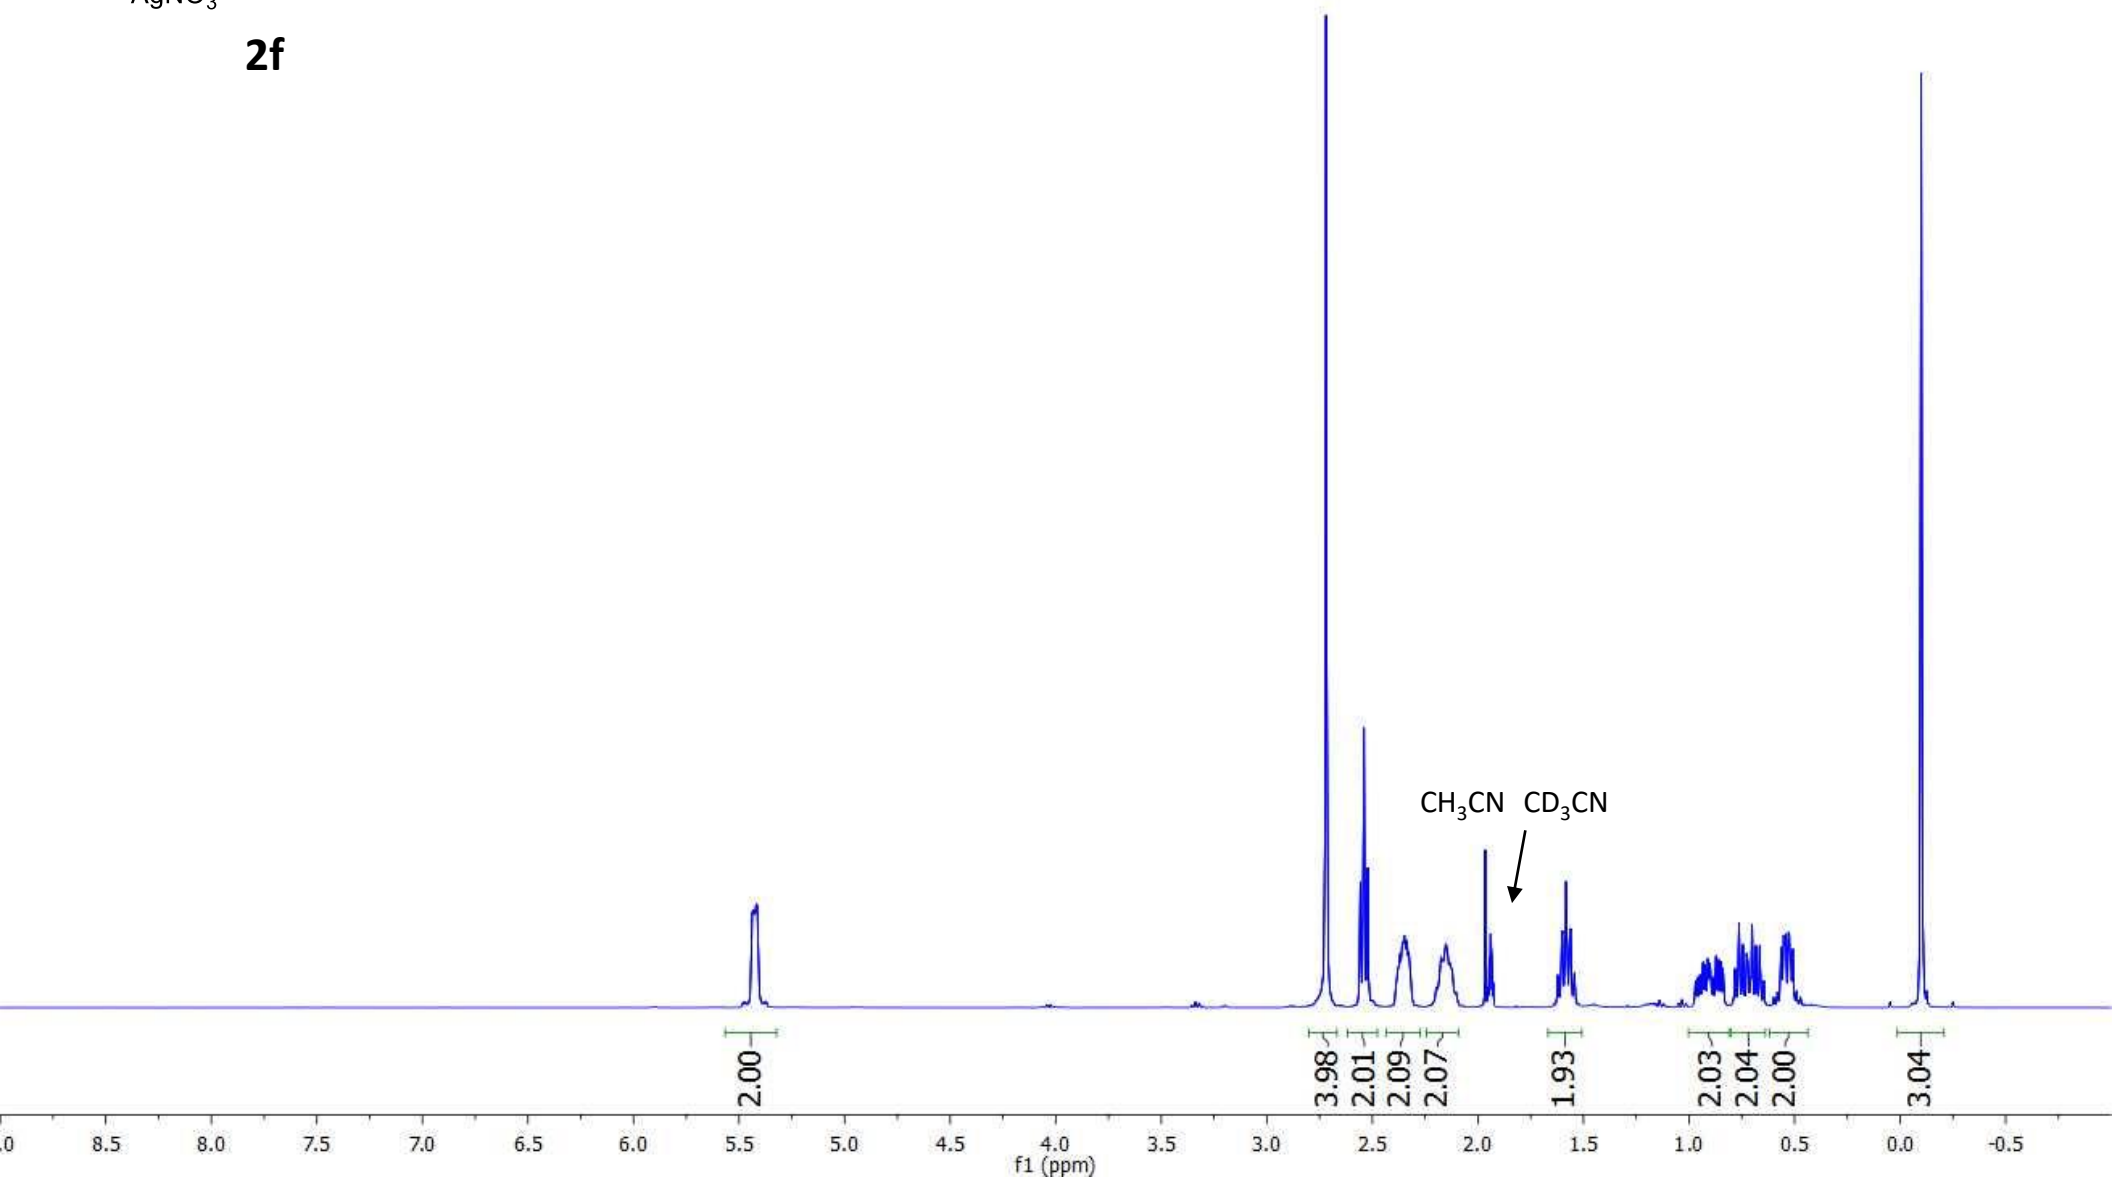

$^{13}\text{C}$  NMR (100 MHz,  $\text{CD}_3\text{CN}$ )

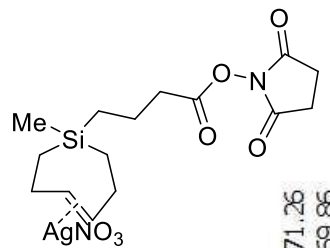

**2f**

171.26  
169.86

120.86  
120.73

34.75  
28.27  
28.18  
26.27  
20.11  
18.22  
18.18  
15.31

-2.91

$\text{CD}_3\text{CN}$

$\text{CD}_3\text{CN}$

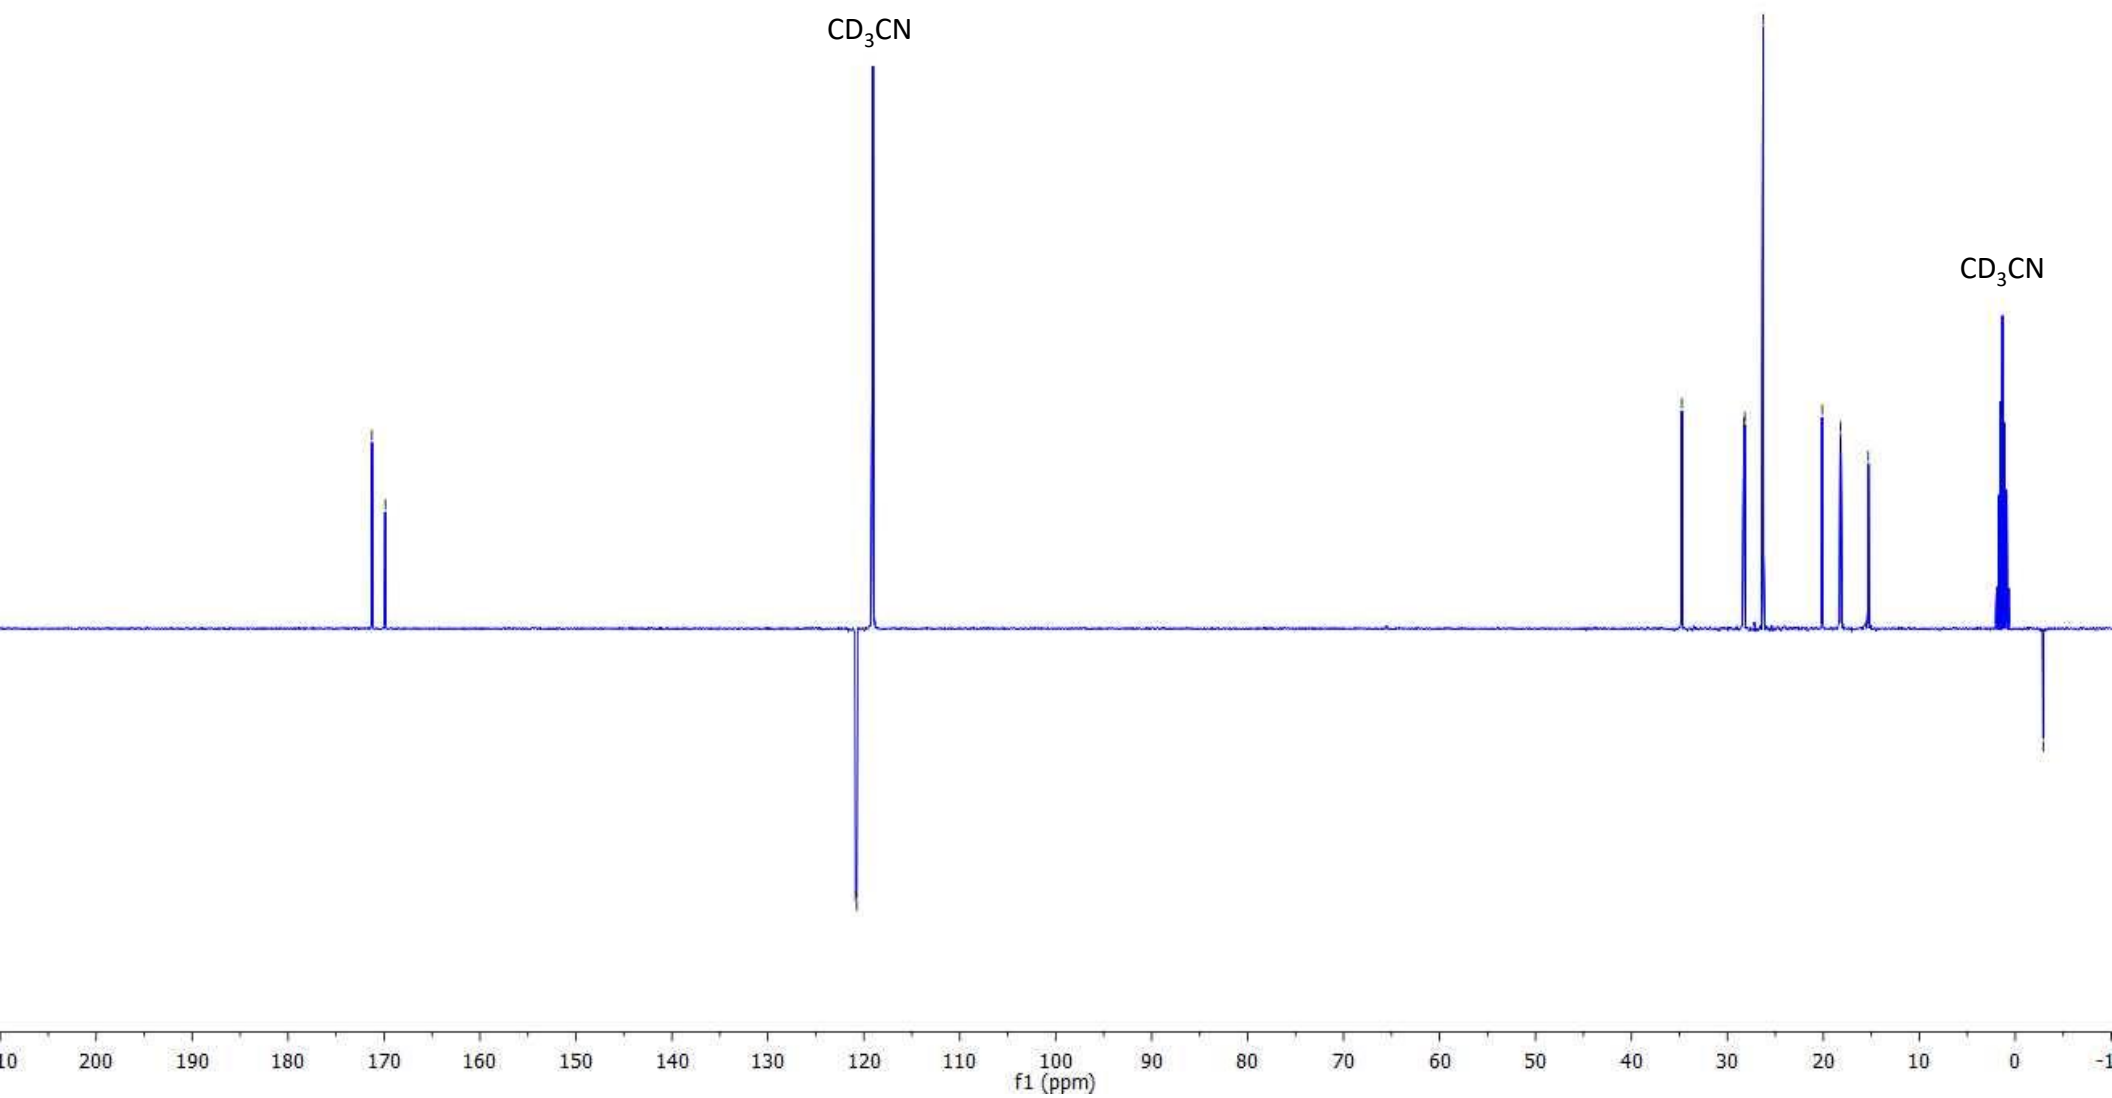

$^1\text{H}$  NMR (600 MHz,  $\text{CD}_3\text{OD}$ )

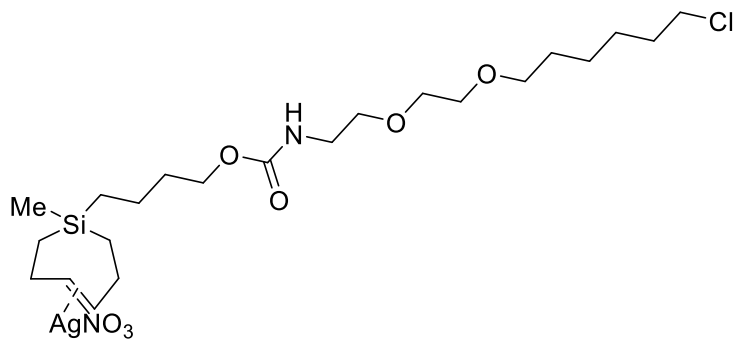

**2g**  
**AgSiTCH-Halo**

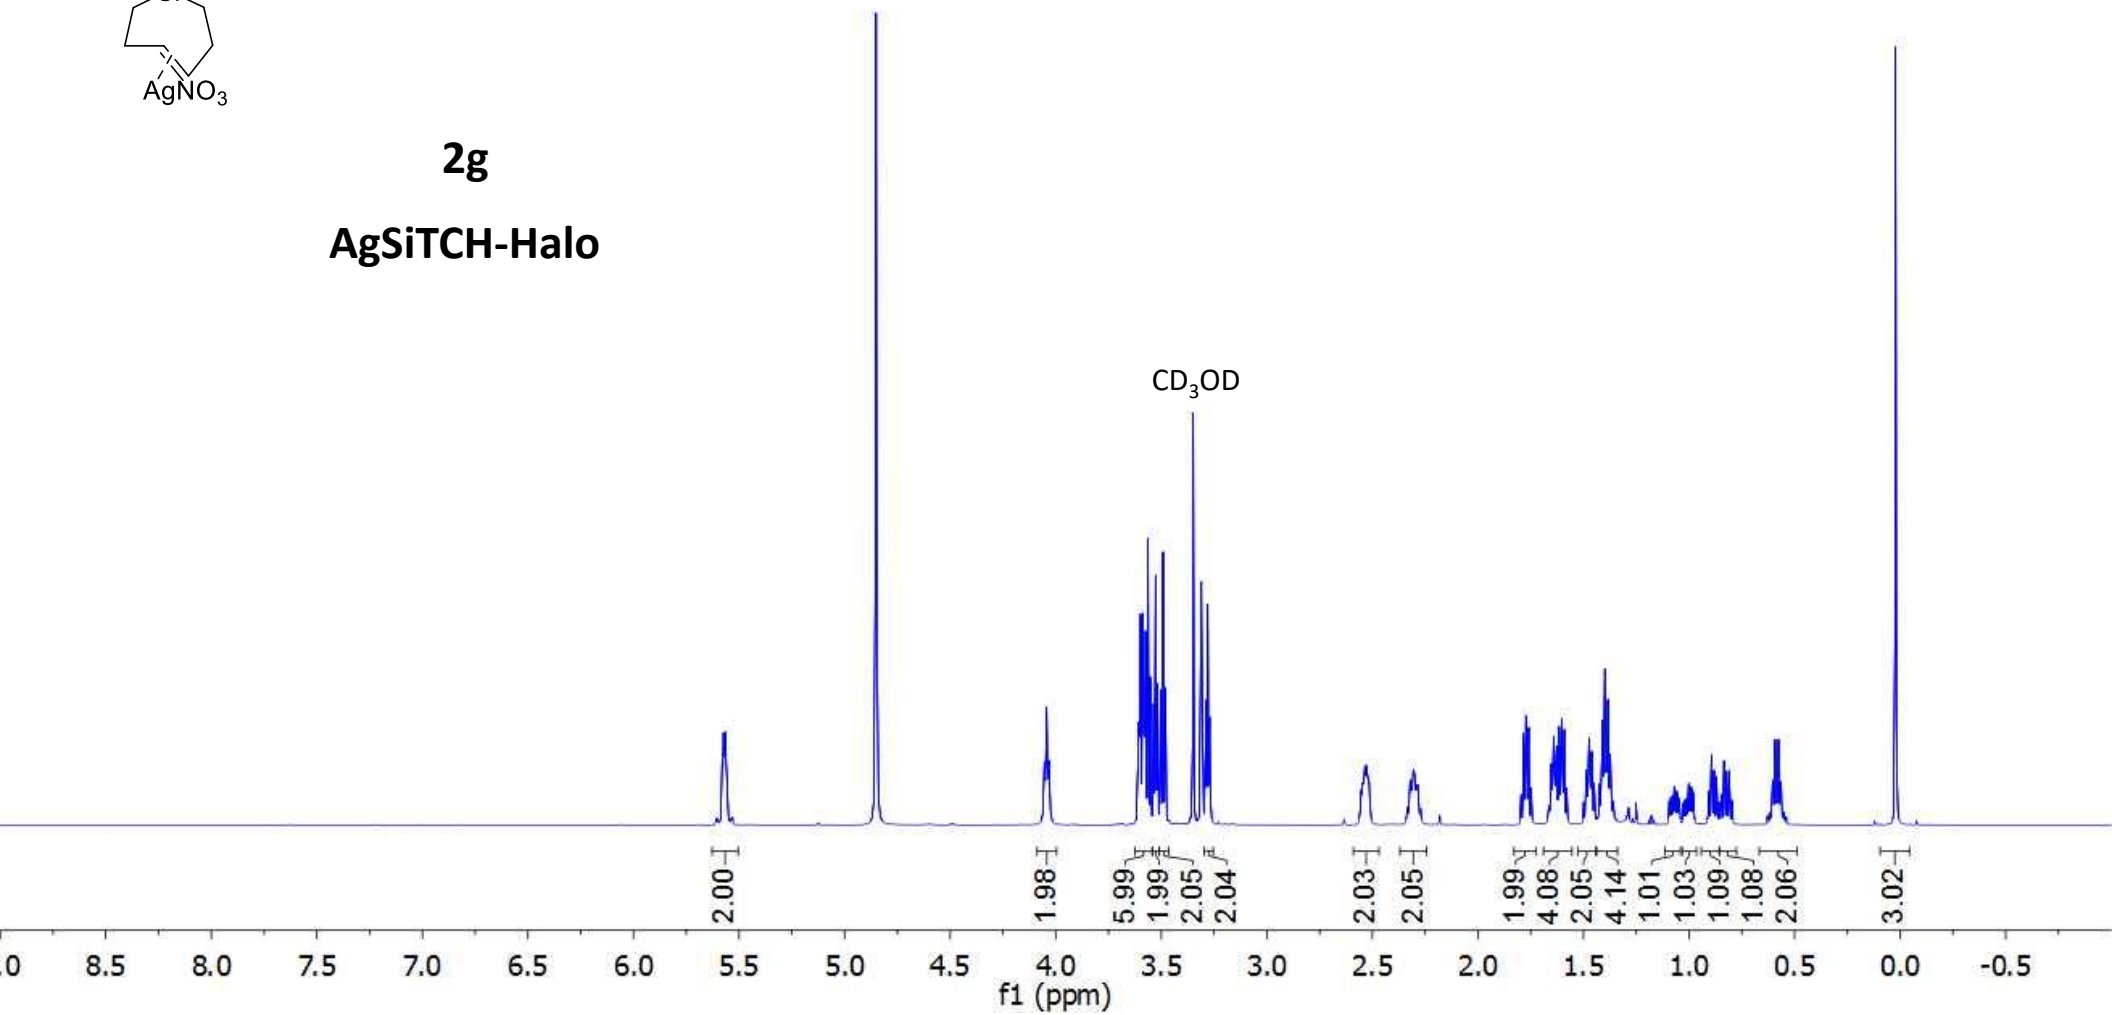





HMQC (400 MHz, CD<sub>3</sub>OD)

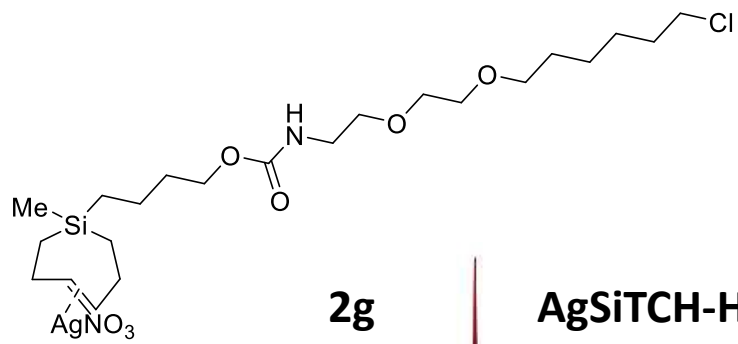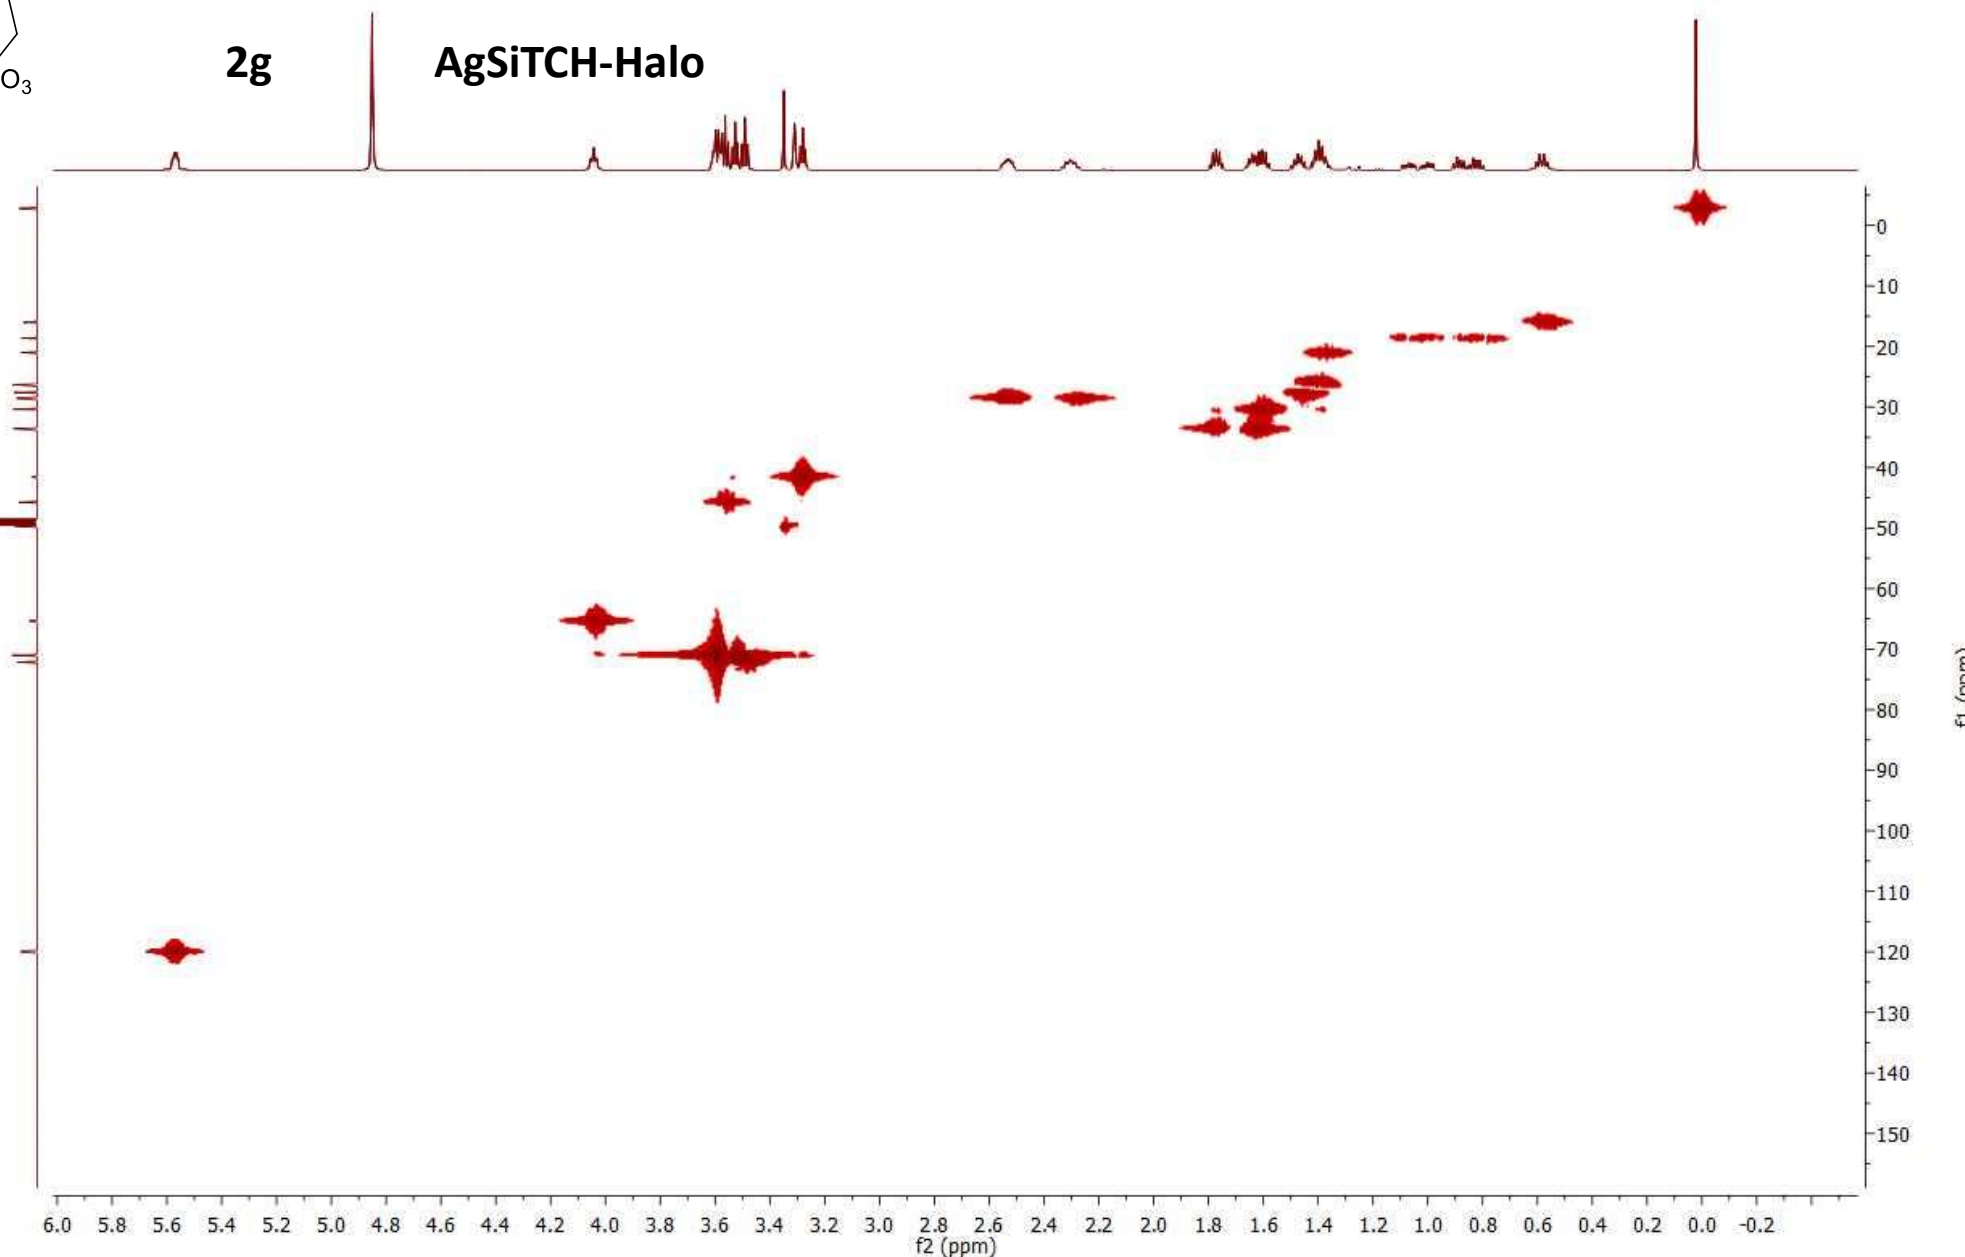

$^1\text{H}$  NMR (600 MHz,  $\text{CDCl}_3$ )

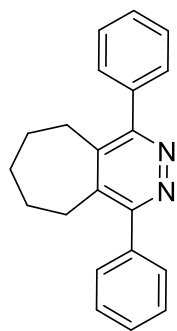

**8**

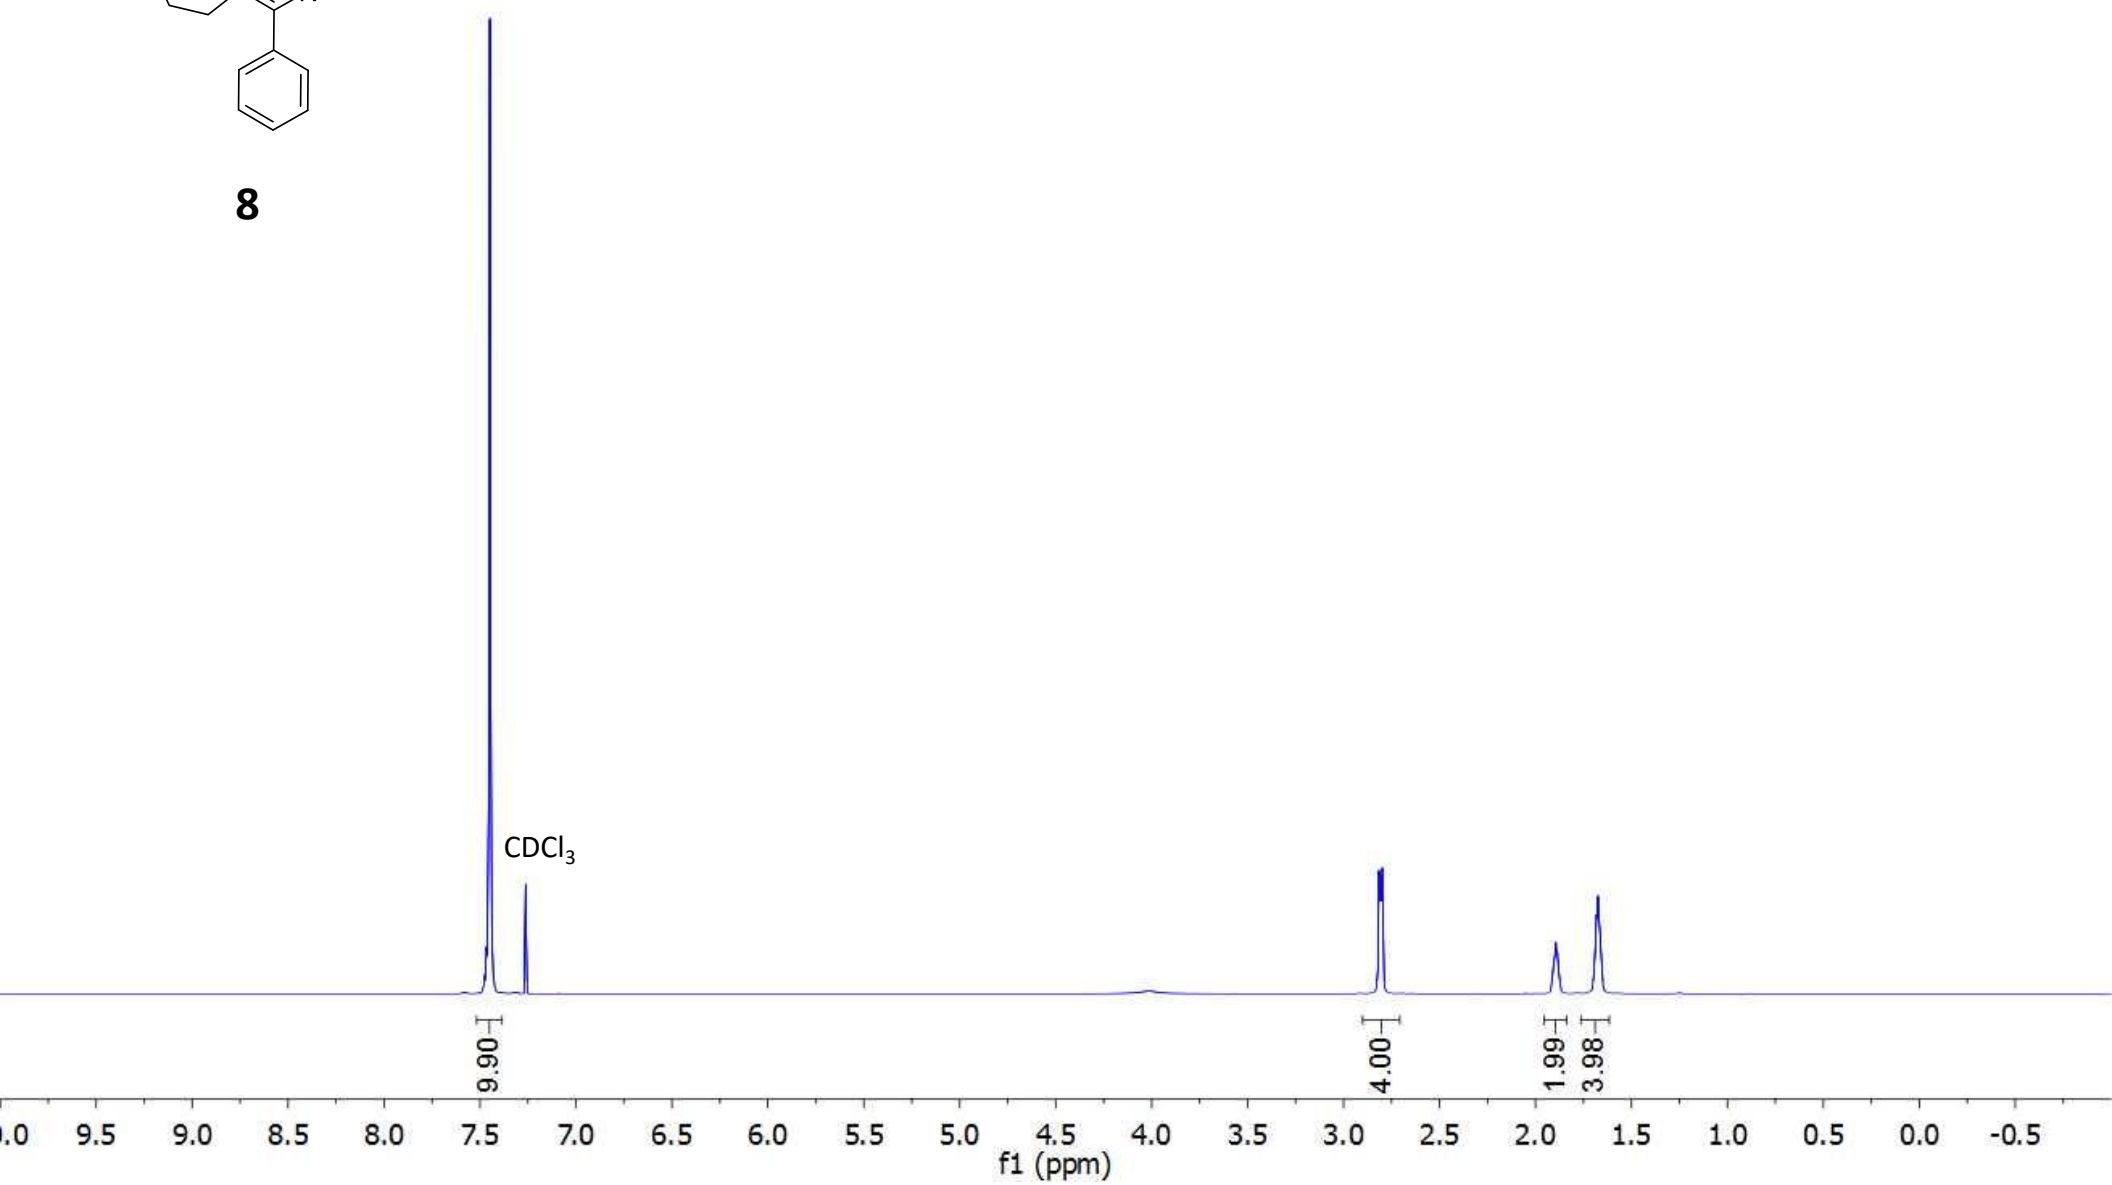

$^{13}\text{C}$  NMR (150 MHz,  $\text{CDCl}_3$ )

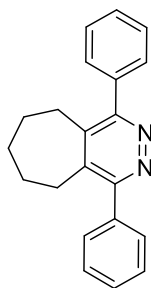

**8**

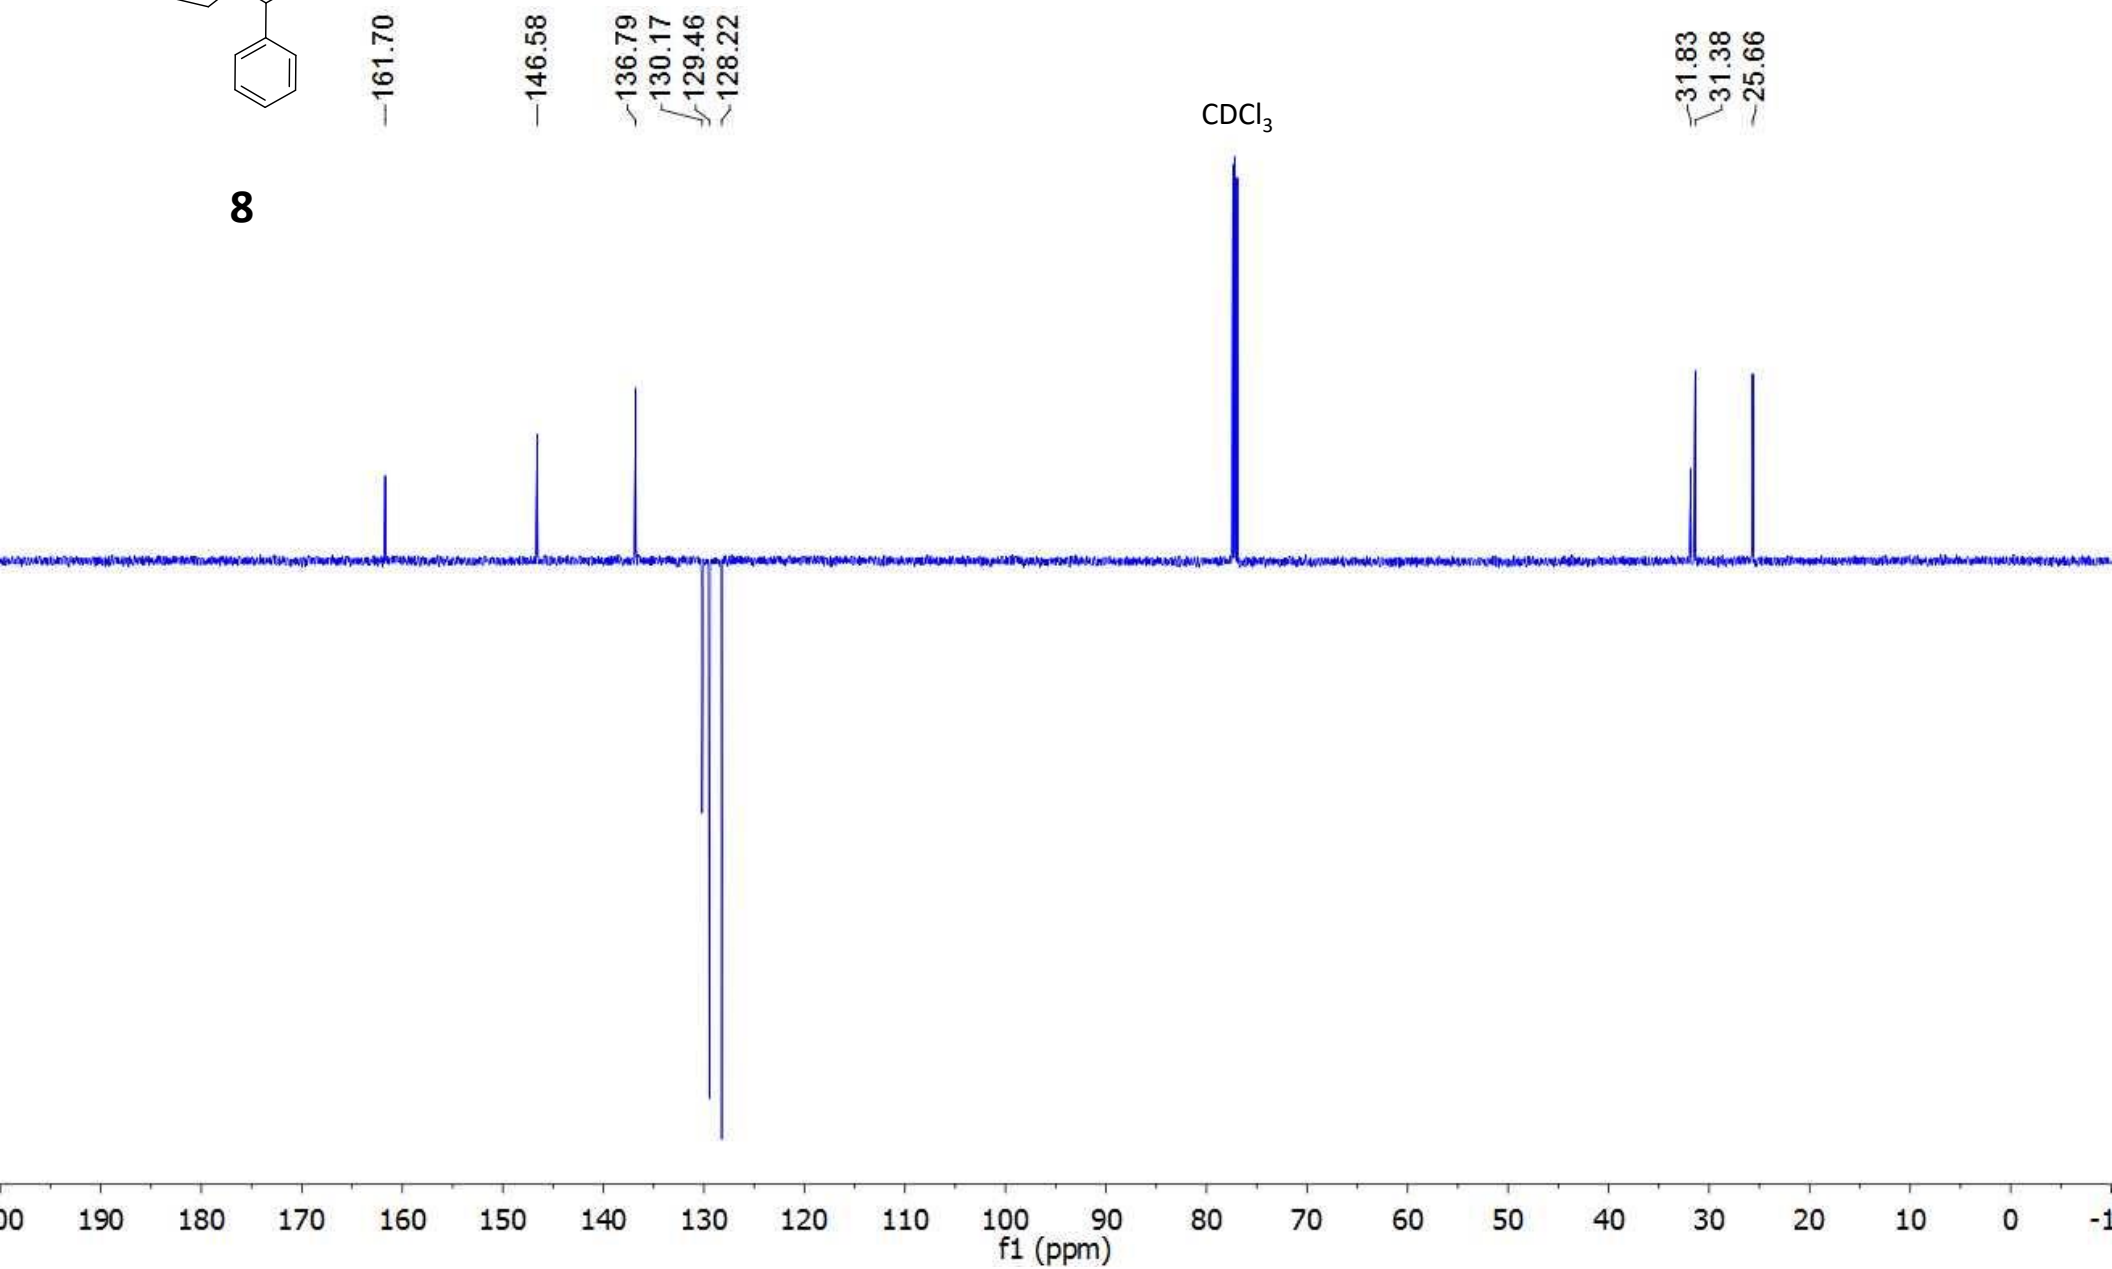

$^1\text{H}$  NMR (600 MHz,  $\text{CDCl}_3$ )

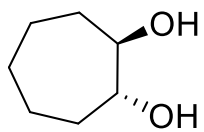

**10**

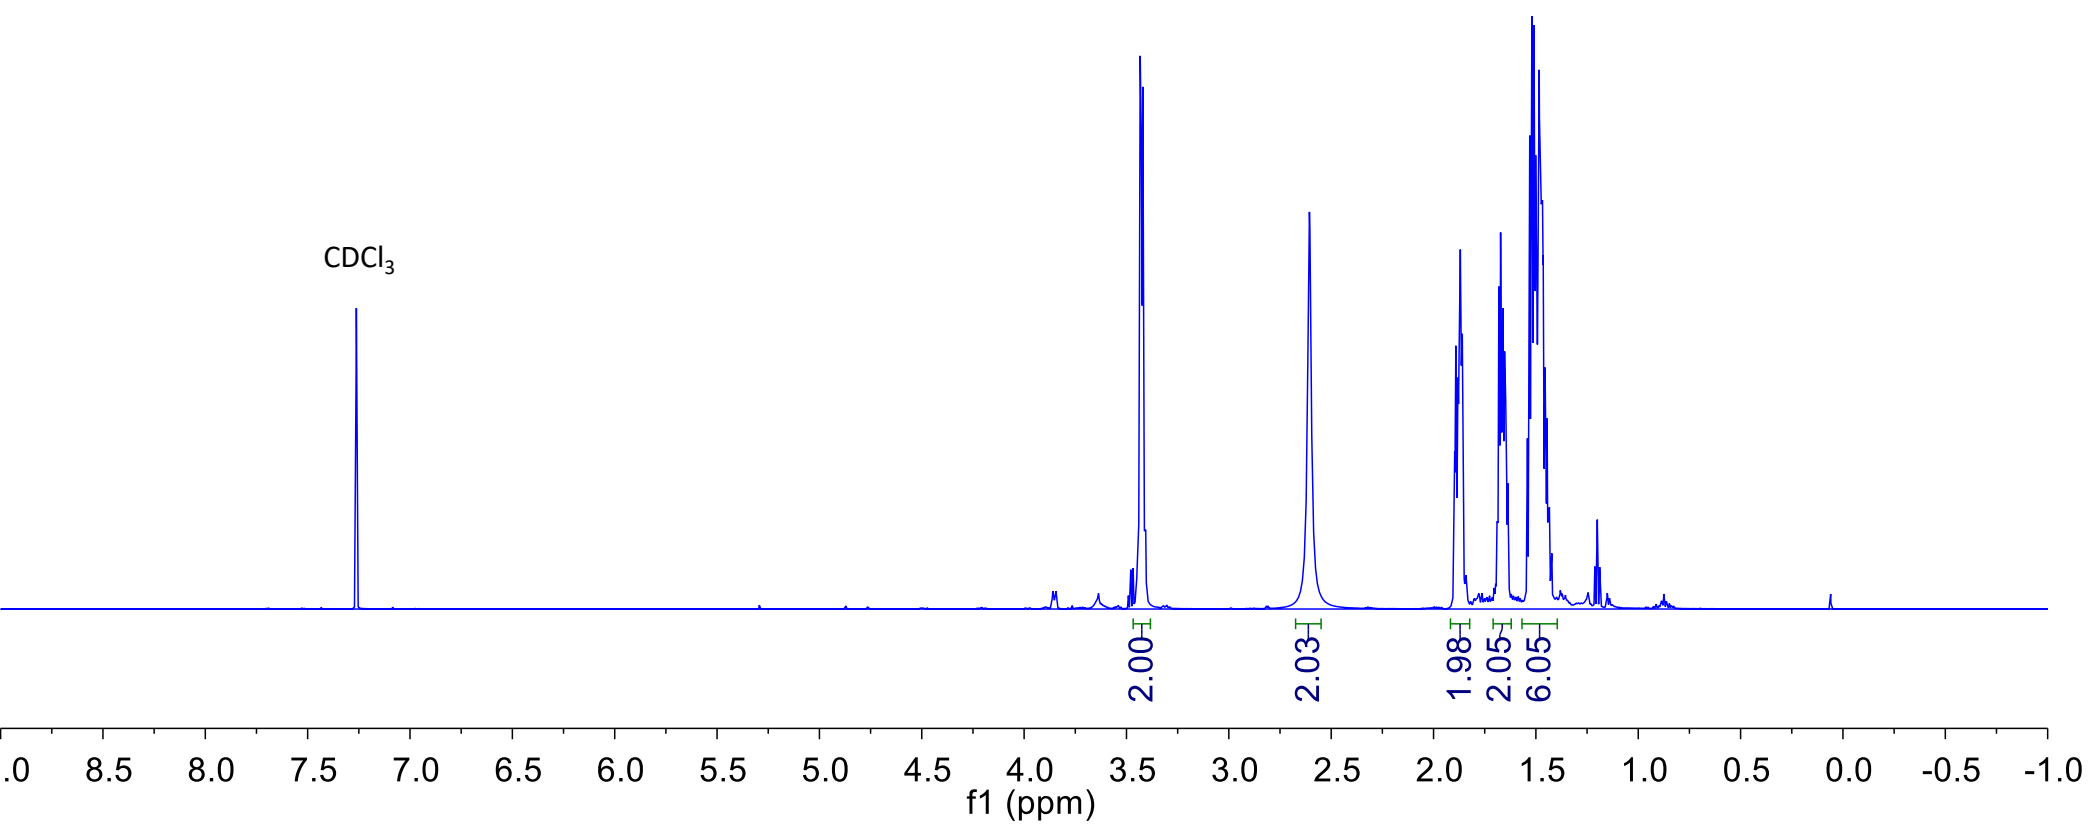

$^{13}\text{C}$  NMR (100 MHz,  $\text{CDCl}_3$ )

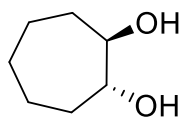

**10**

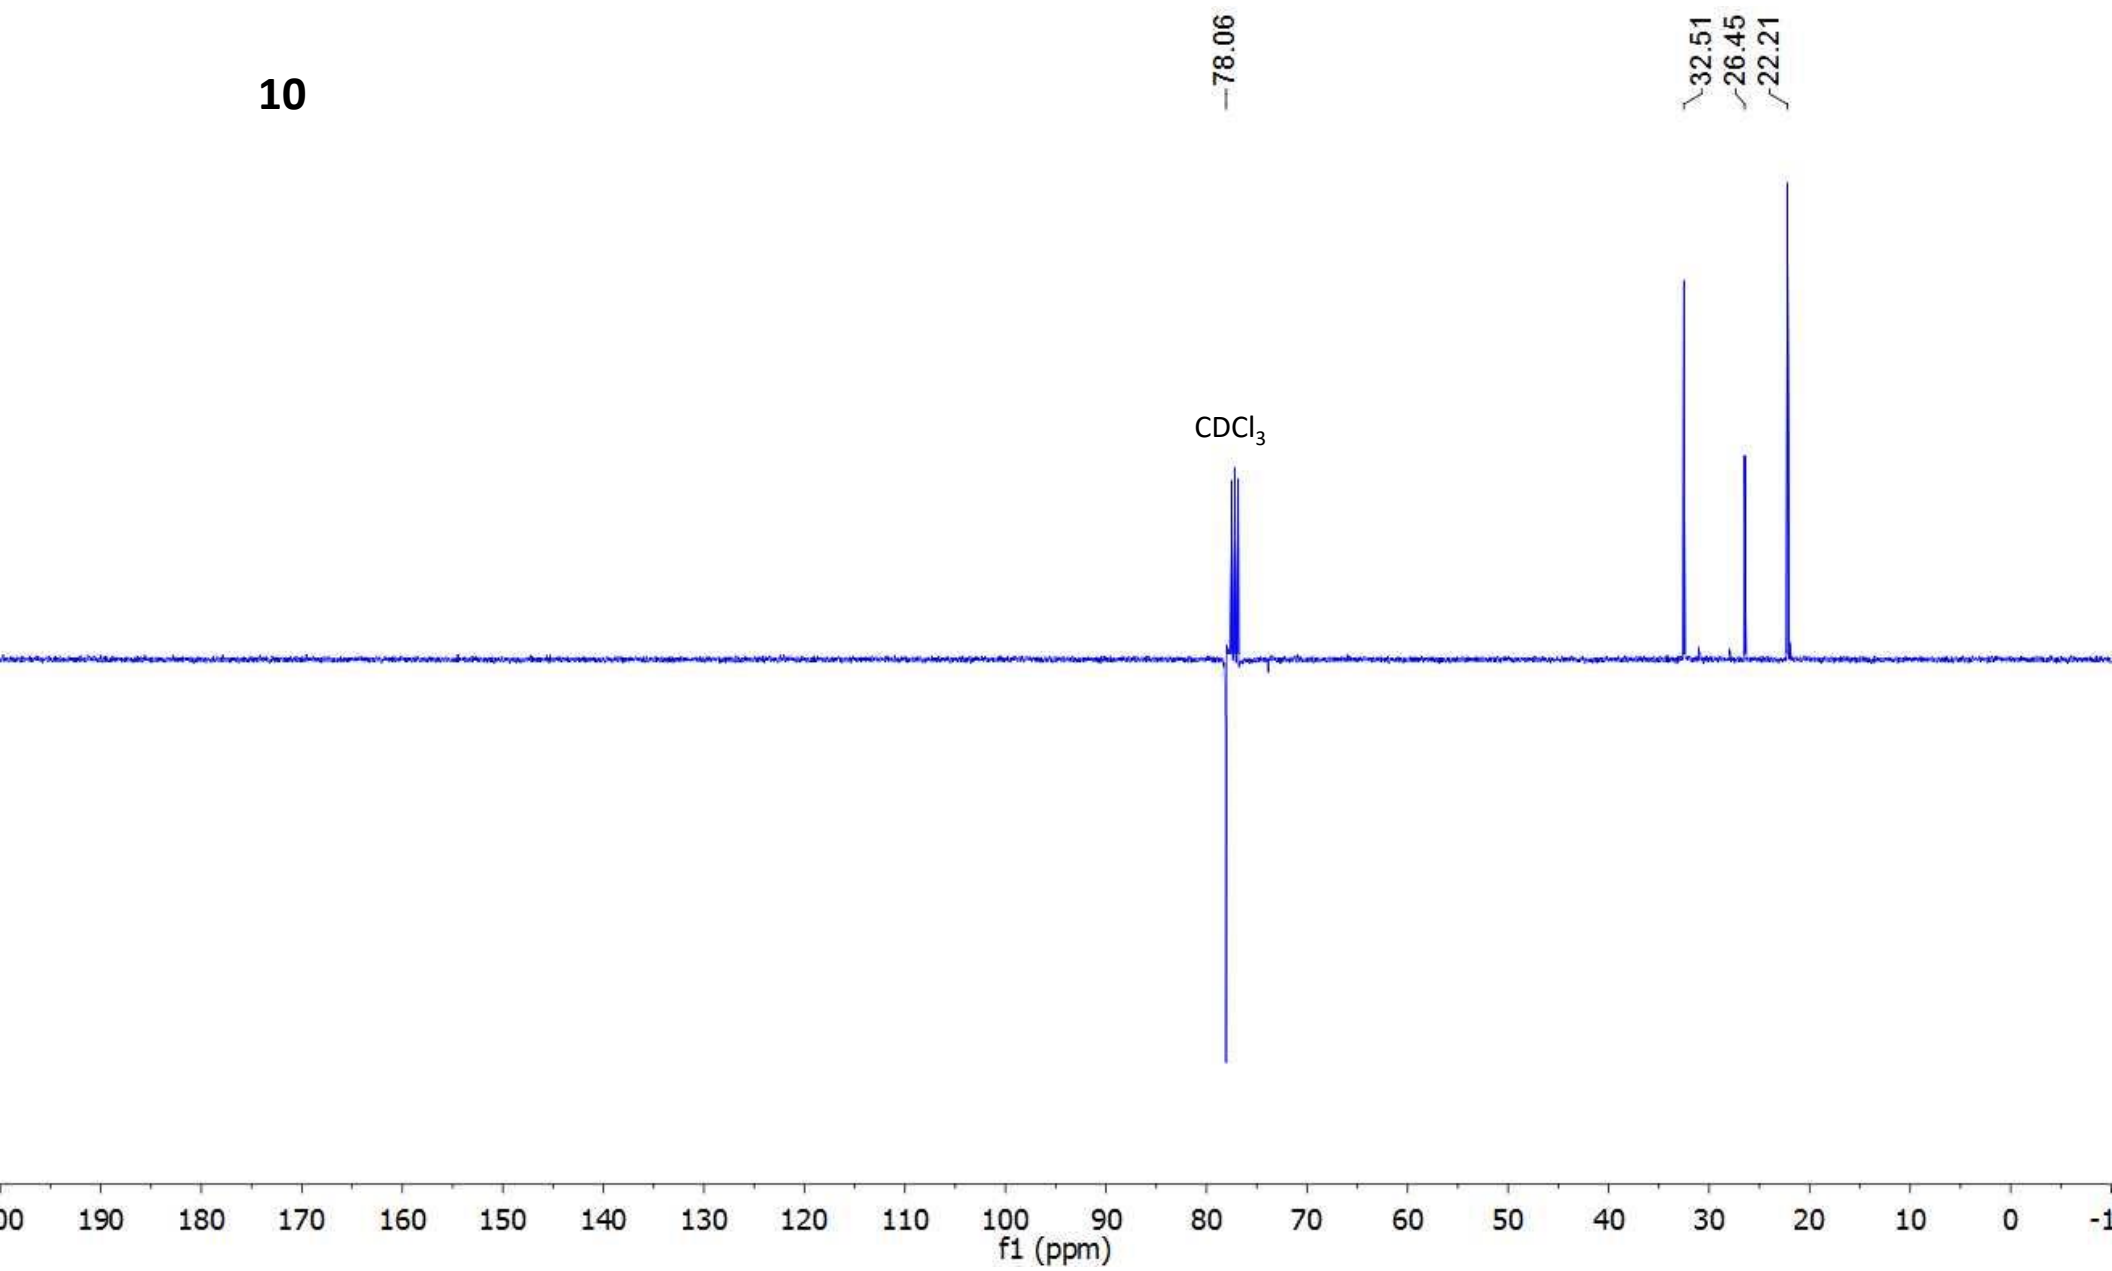

$^1\text{H}$  NMR (400 MHz,  $\text{CDCl}_3$ )

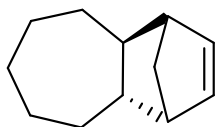

**9**

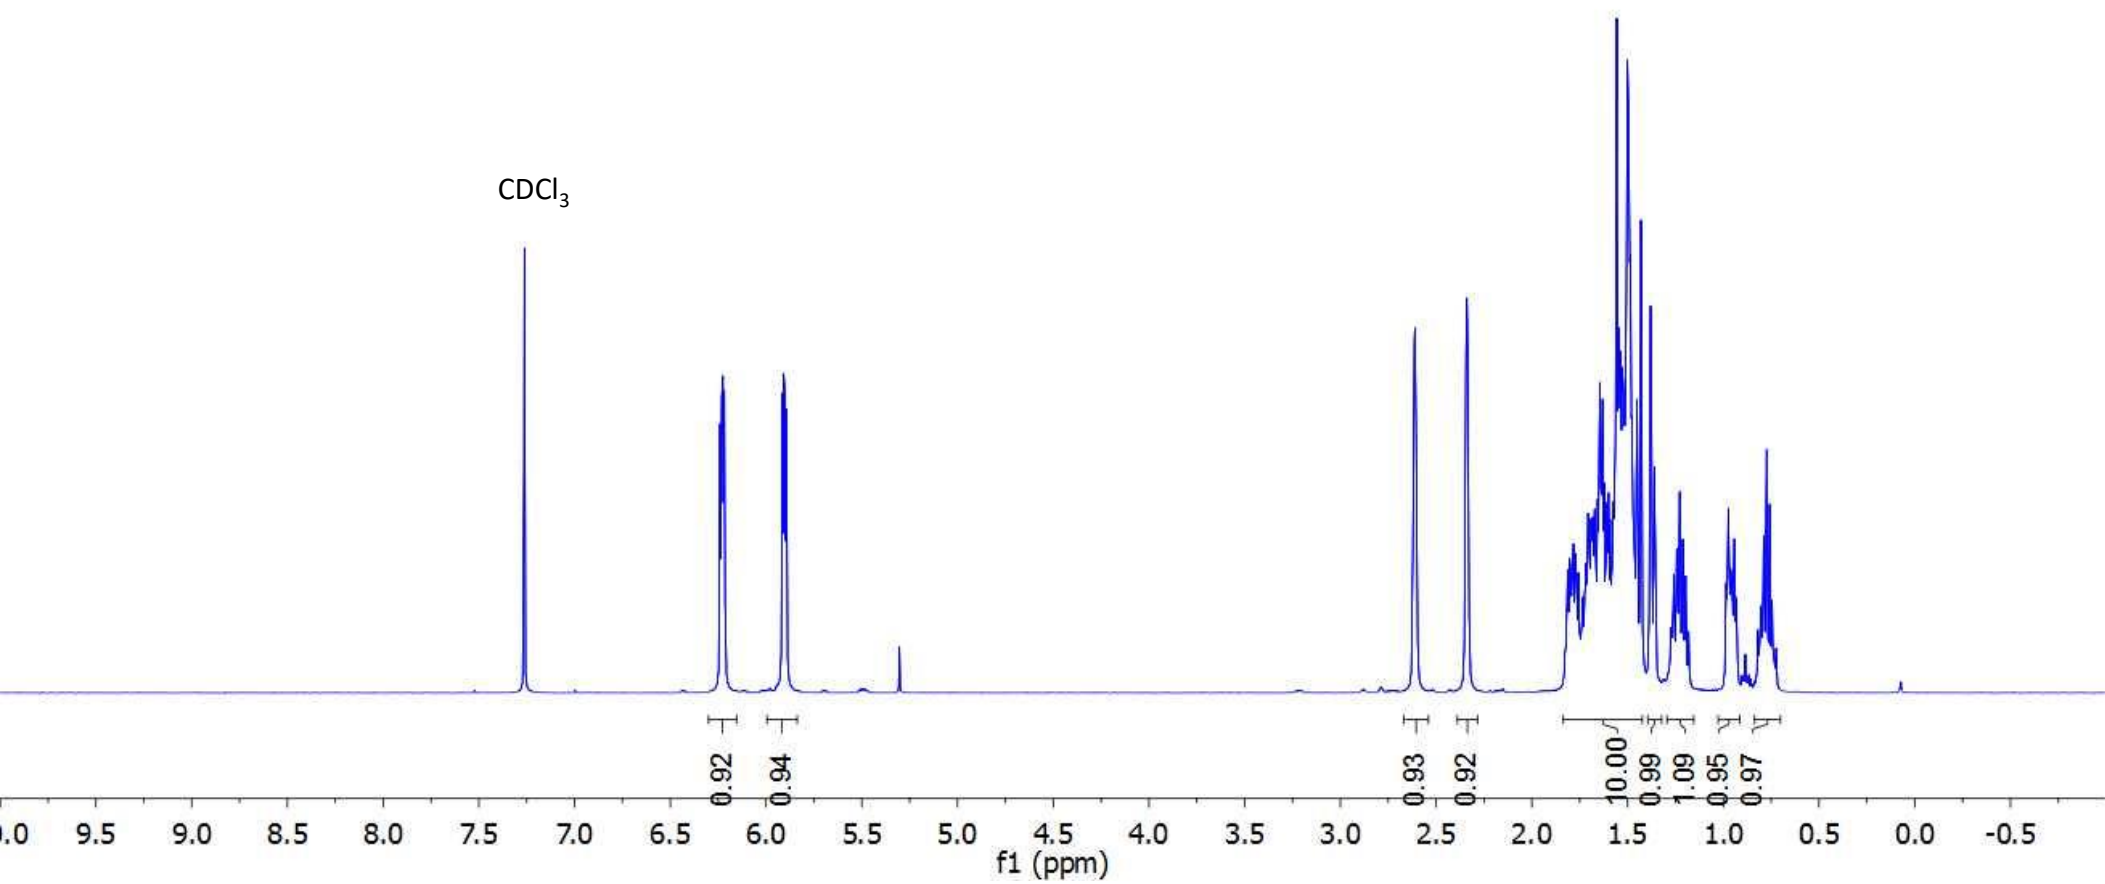

$^{13}\text{C}$  NMR (100 MHz,  $\text{CDCl}_3$ )

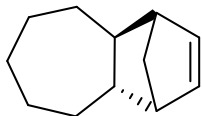

**9**

-139.07

-131.71

47.47

47.30

47.19

45.30

44.89

32.77

30.78

29.53

29.34

25.05

$\text{CDCl}_3$

190 180 170 160 150 140 130 120 110 100 90 80 70 60 50 40 30 20 10 0 -10  
f1 (ppm)



$^1\text{H}$  NMR (600 MHz,  $\text{CDCl}_3$ )

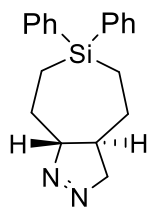

**12**

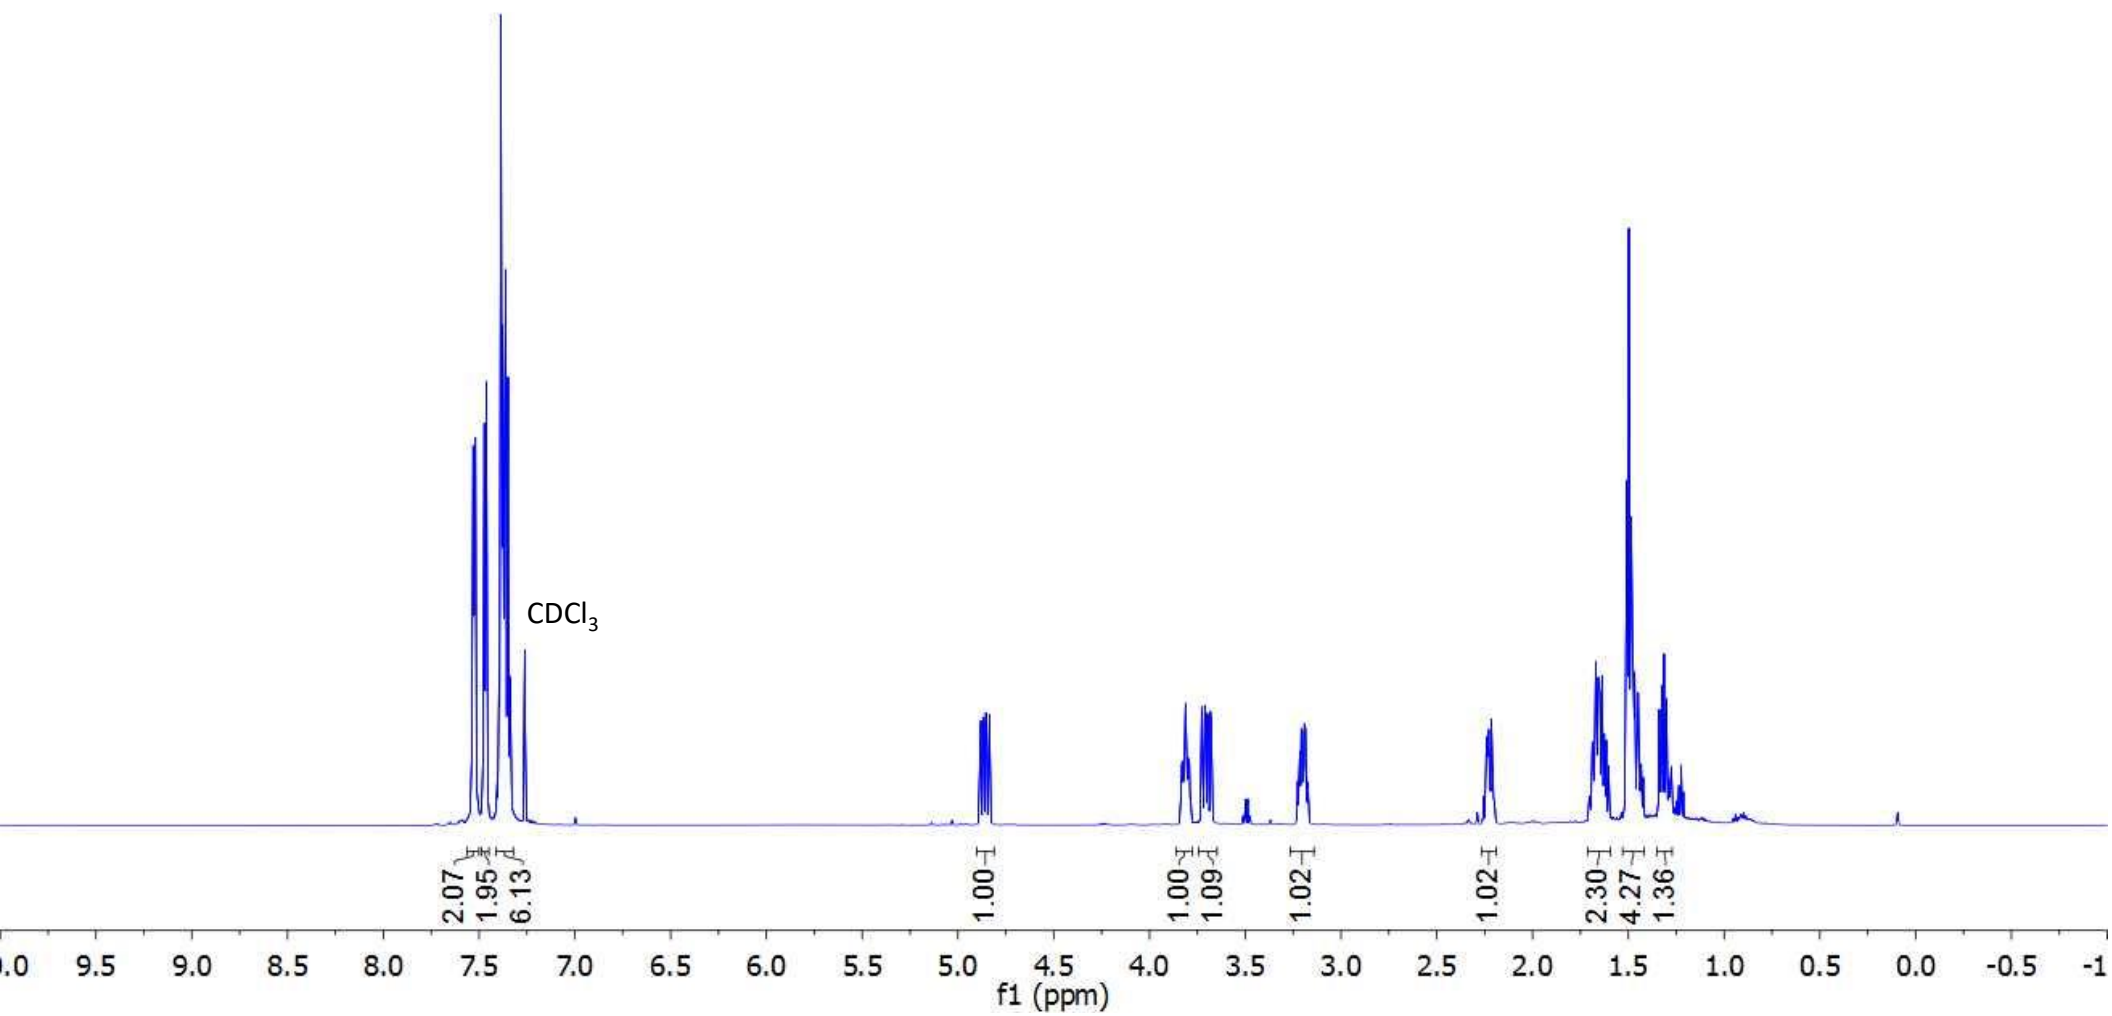

$^{13}\text{C}$  NMR (100 MHz,  $\text{CDCl}_3$ )

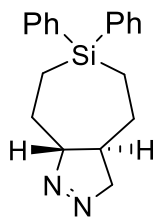

**12**

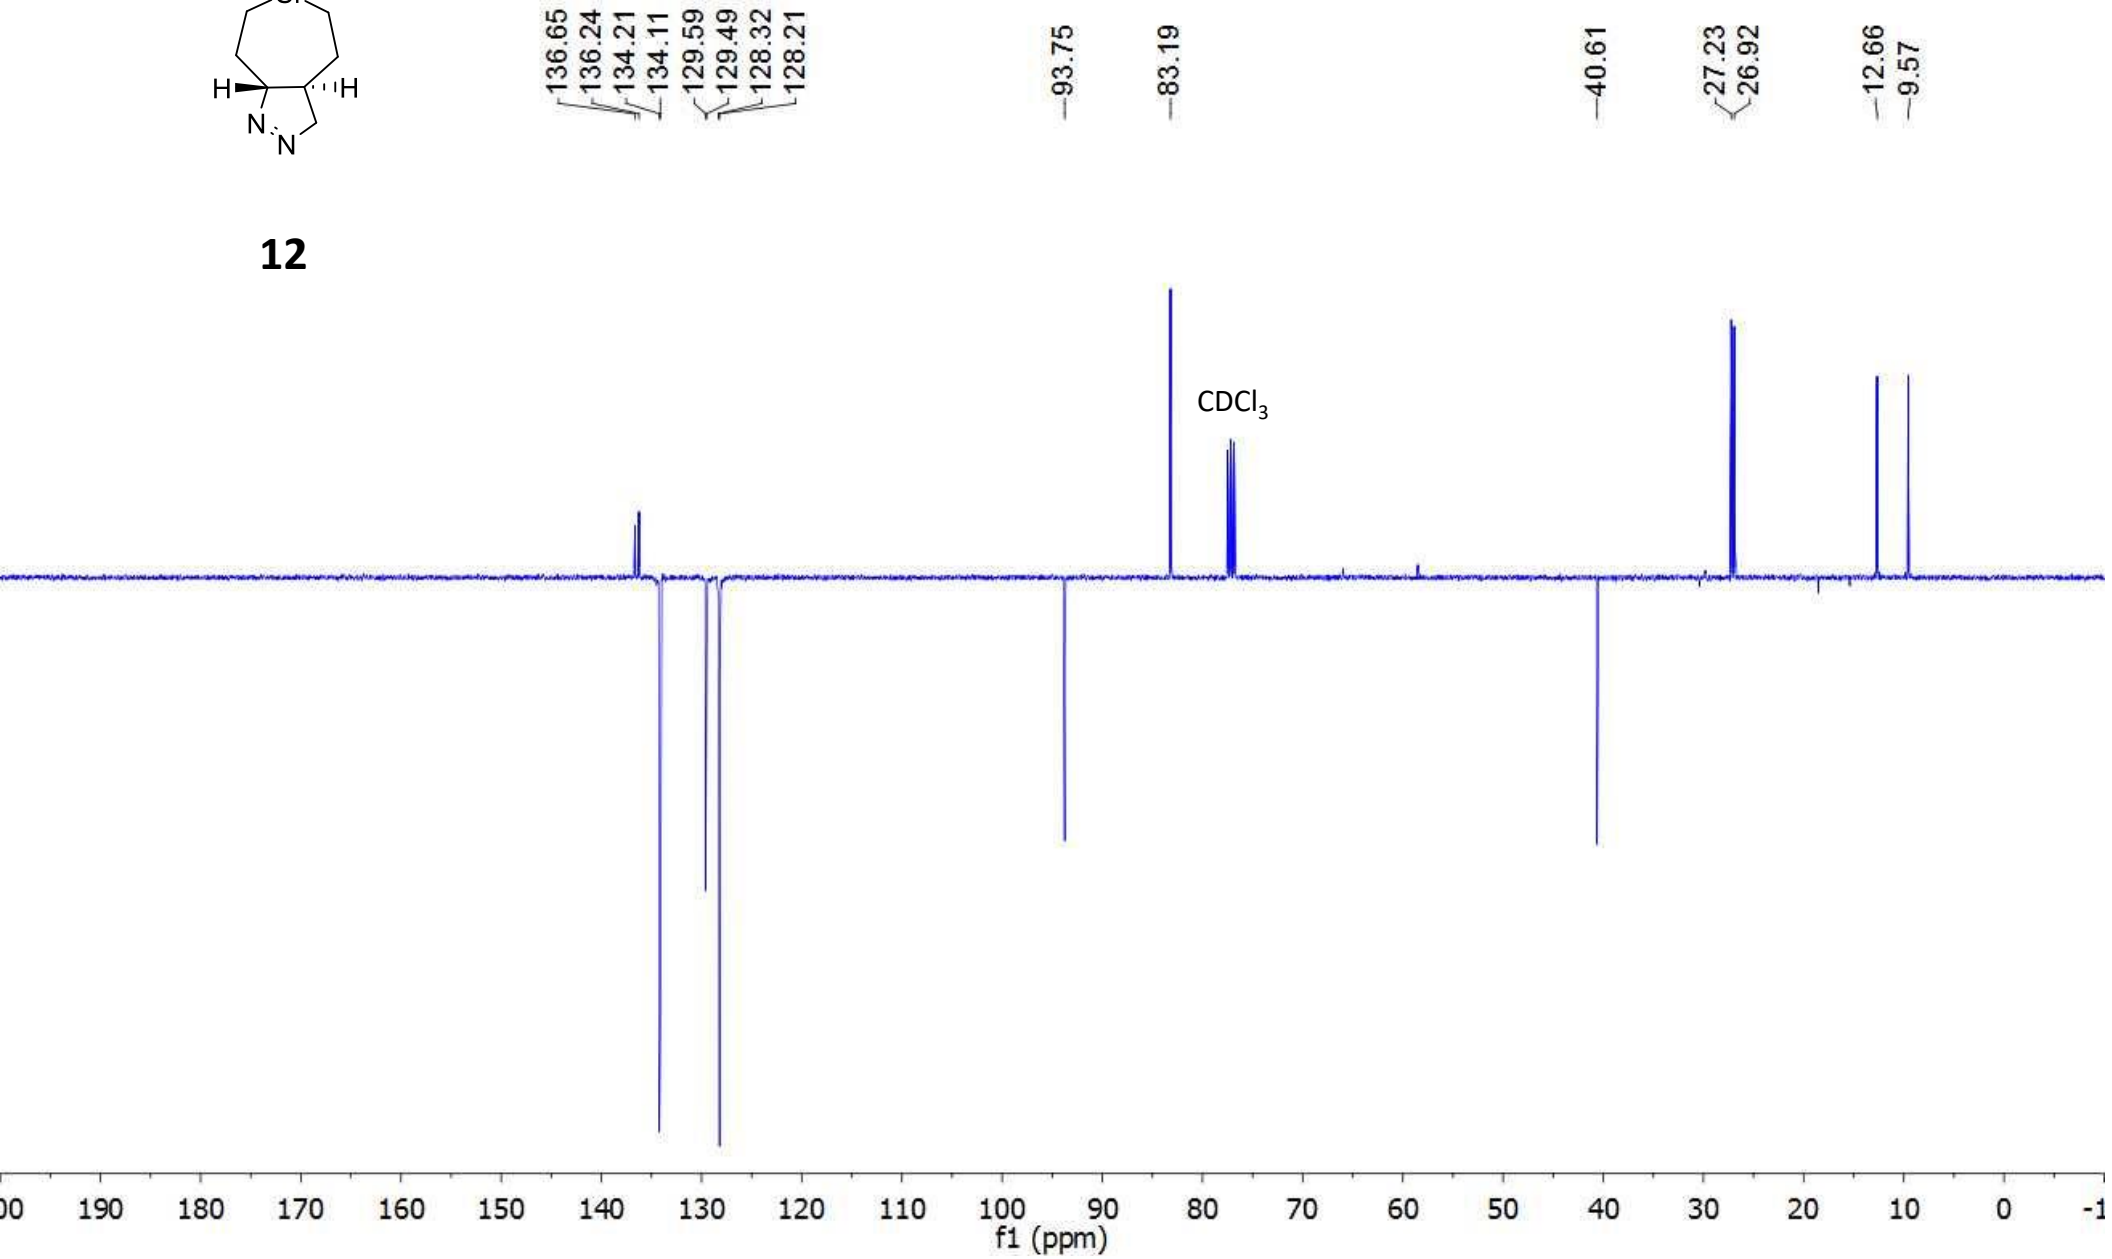

COSY (400 MHz, CDCl<sub>3</sub>)

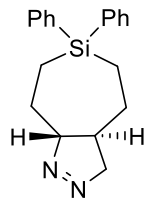

**12**

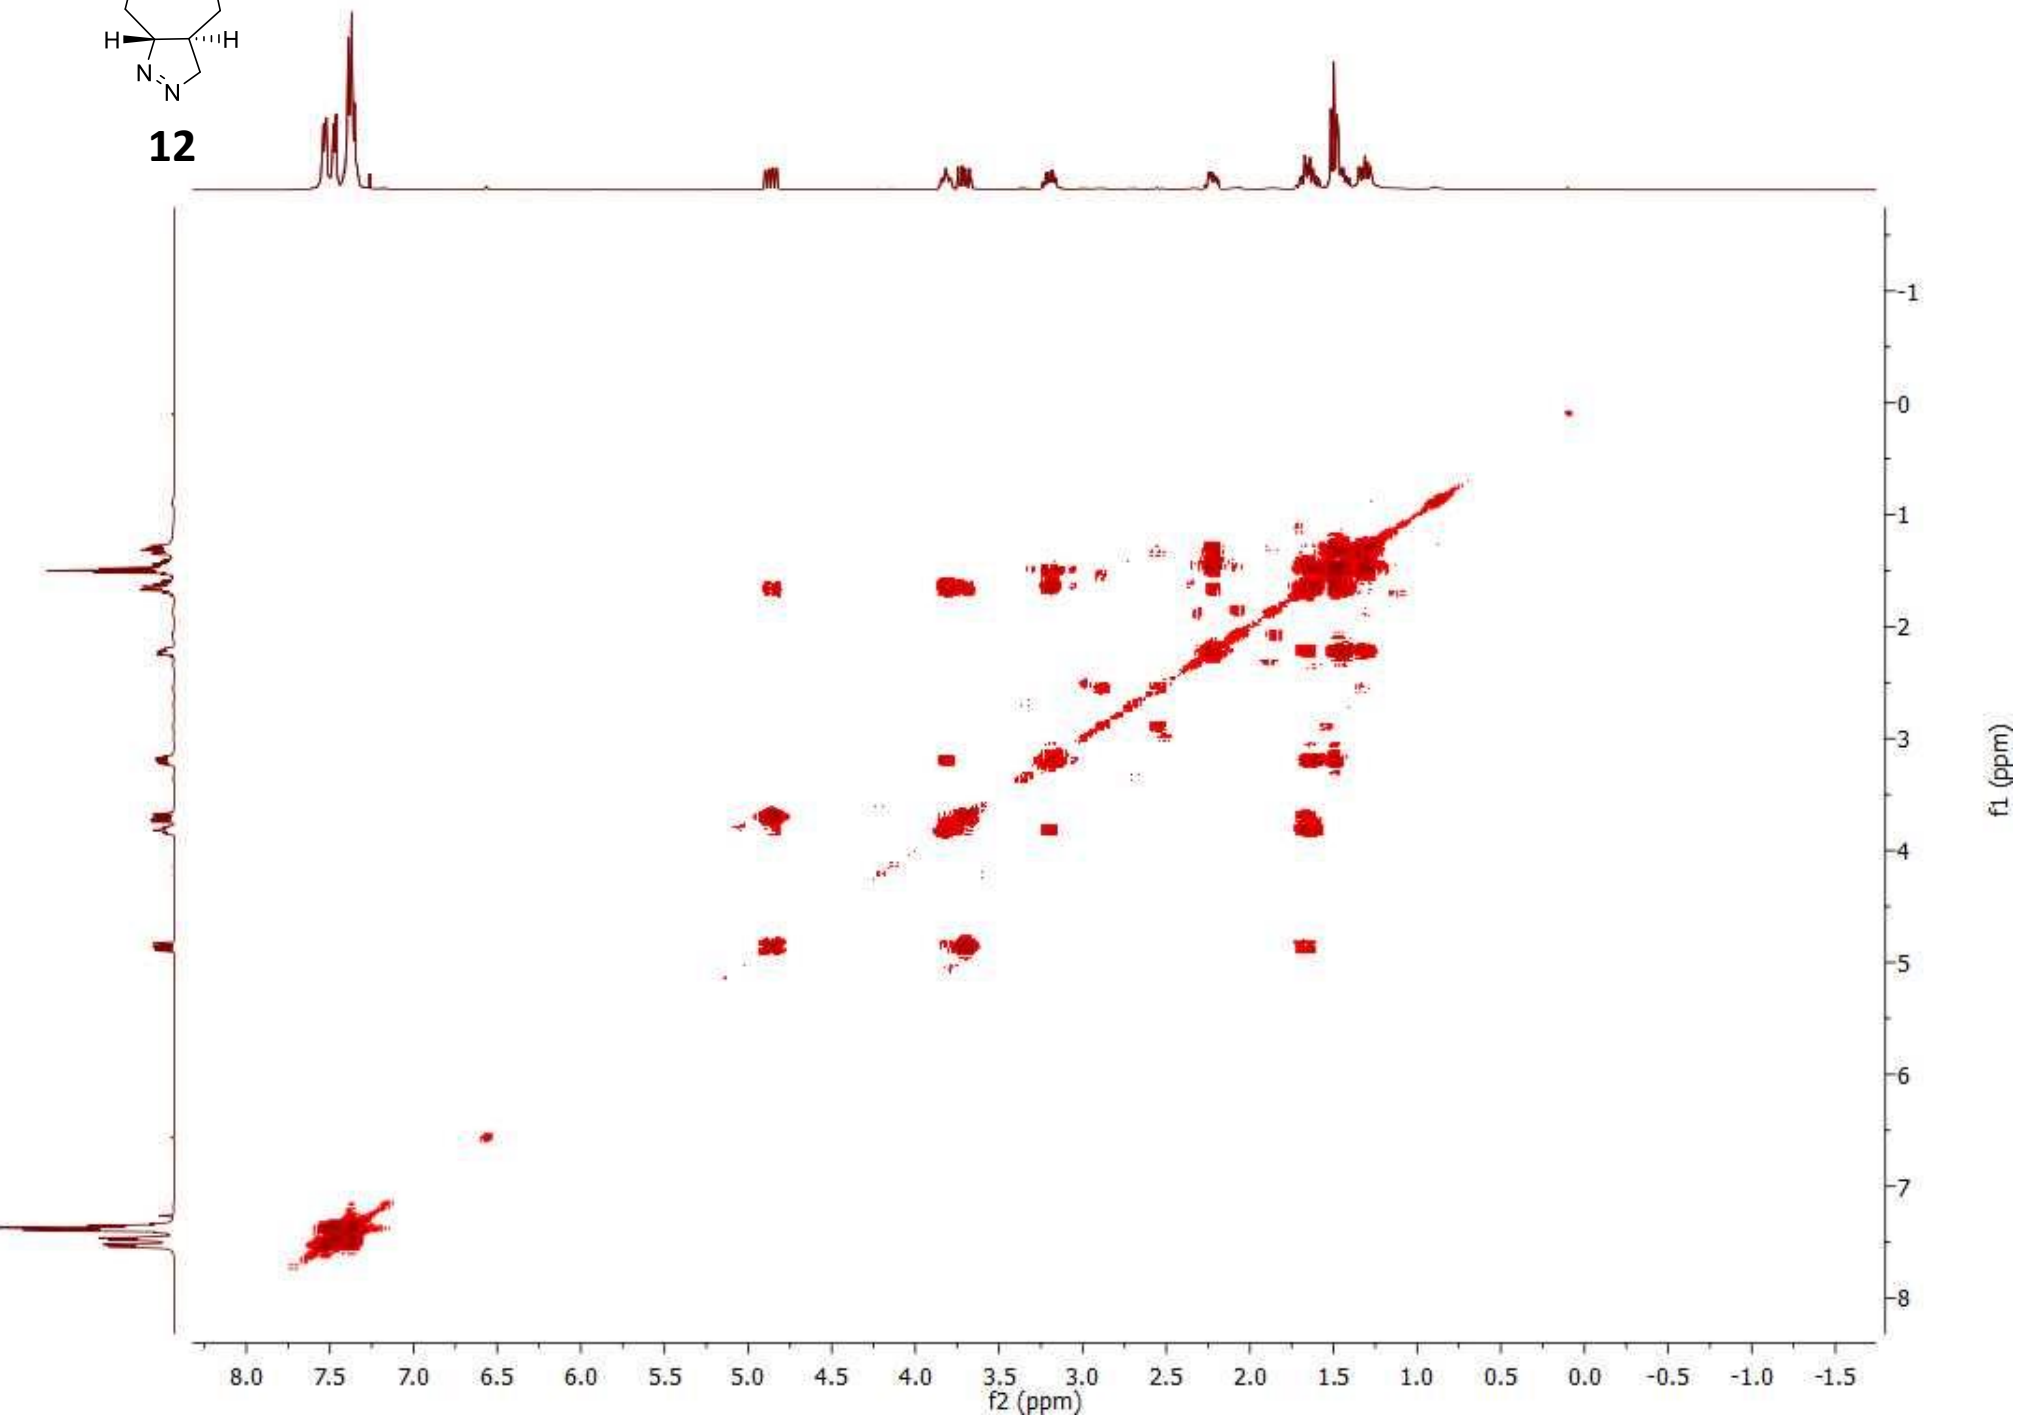

HMQC (400 MHz, CDCl<sub>3</sub>)

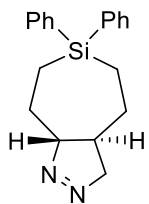

**12**

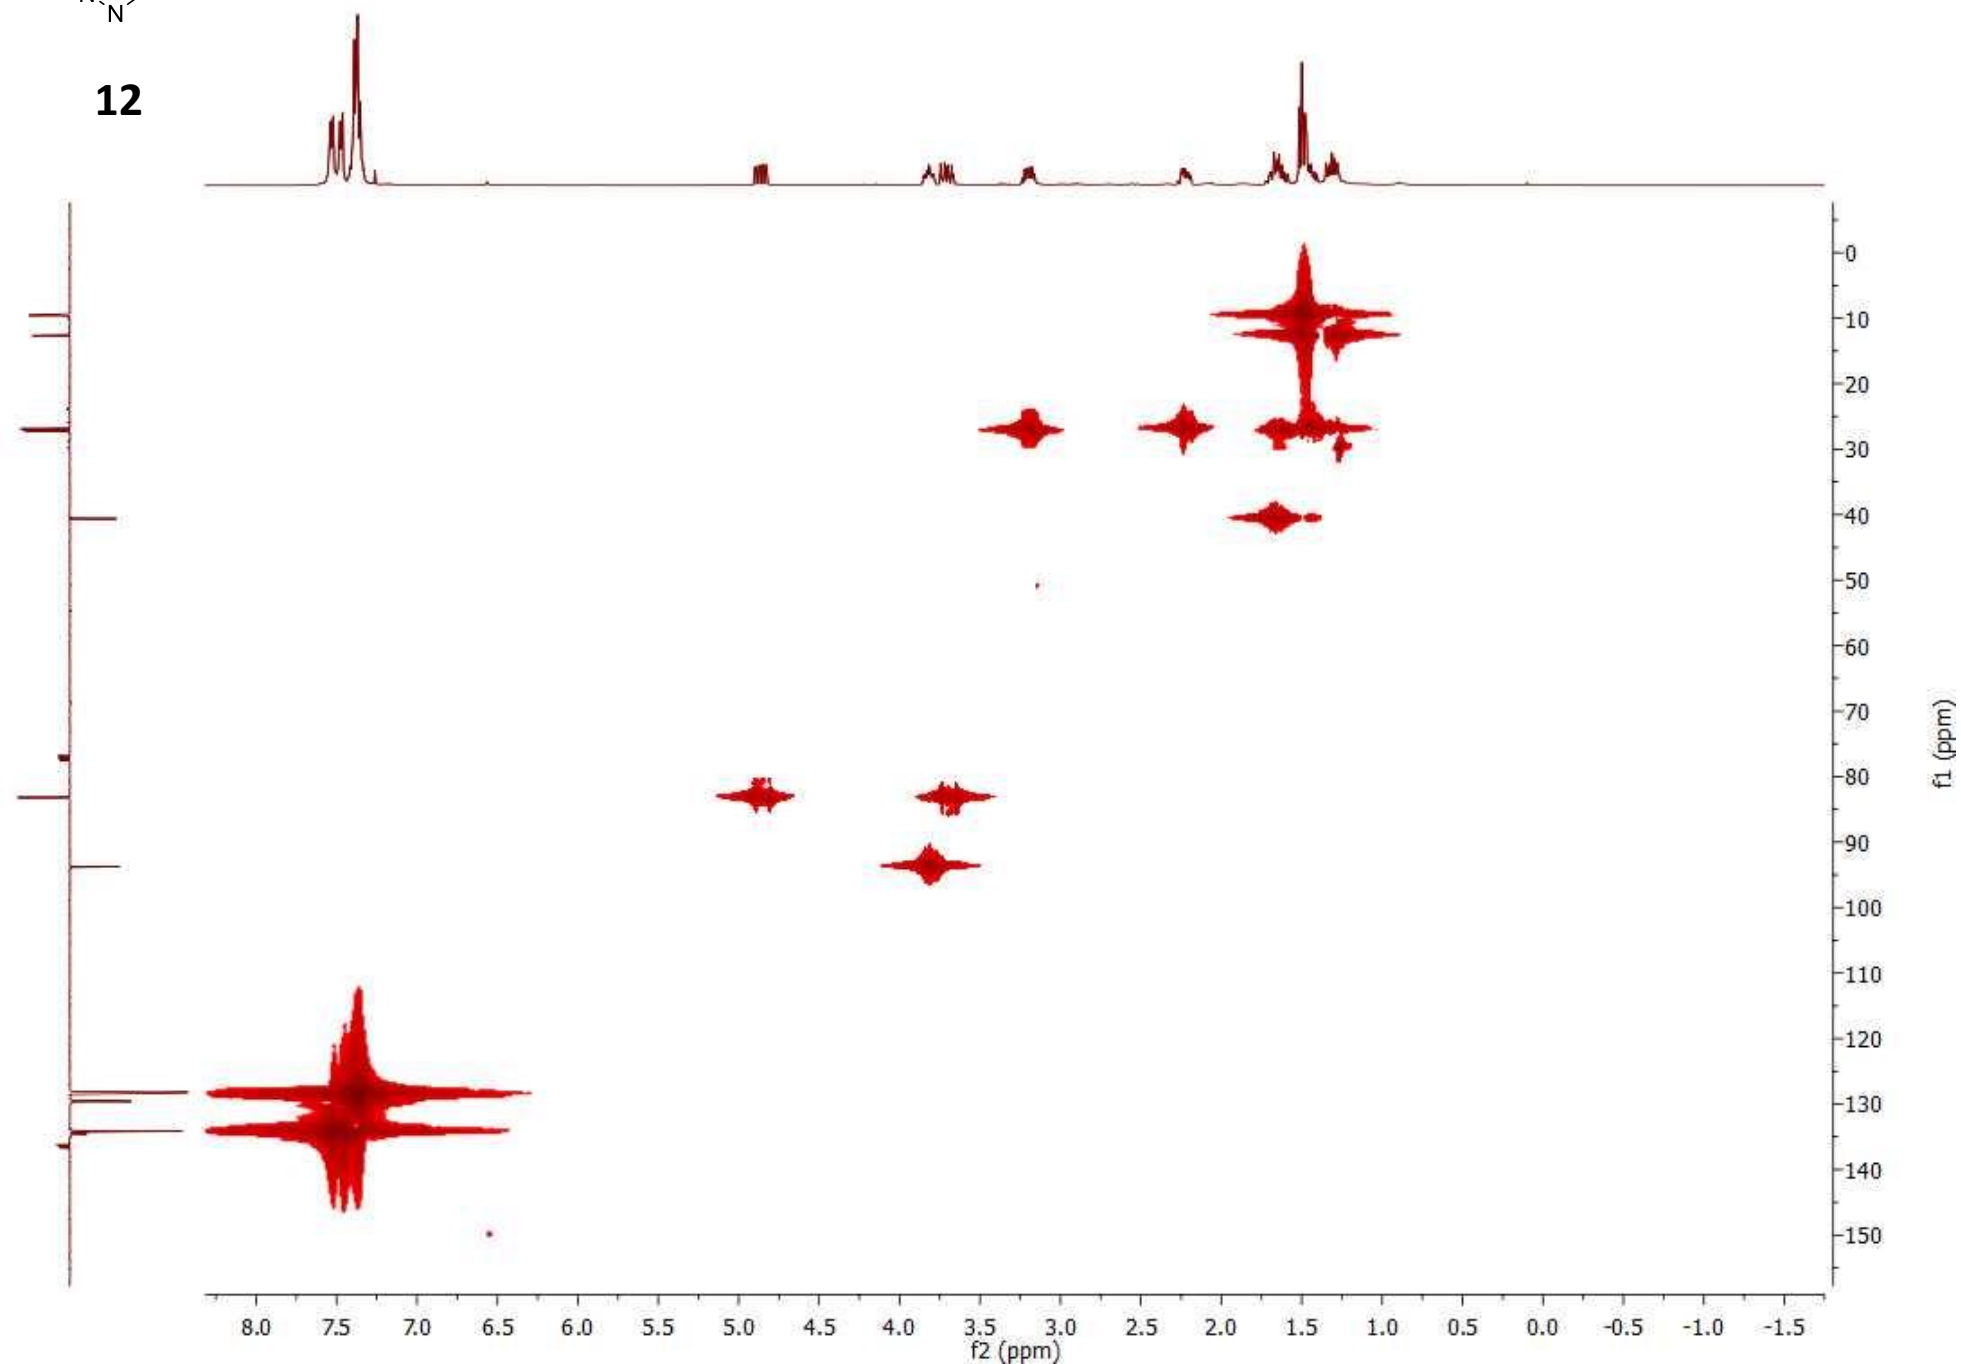

$^1\text{H}$  NMR (600 MHz,  $\text{CDCl}_3$ )

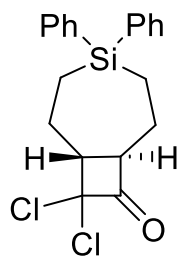

**13**

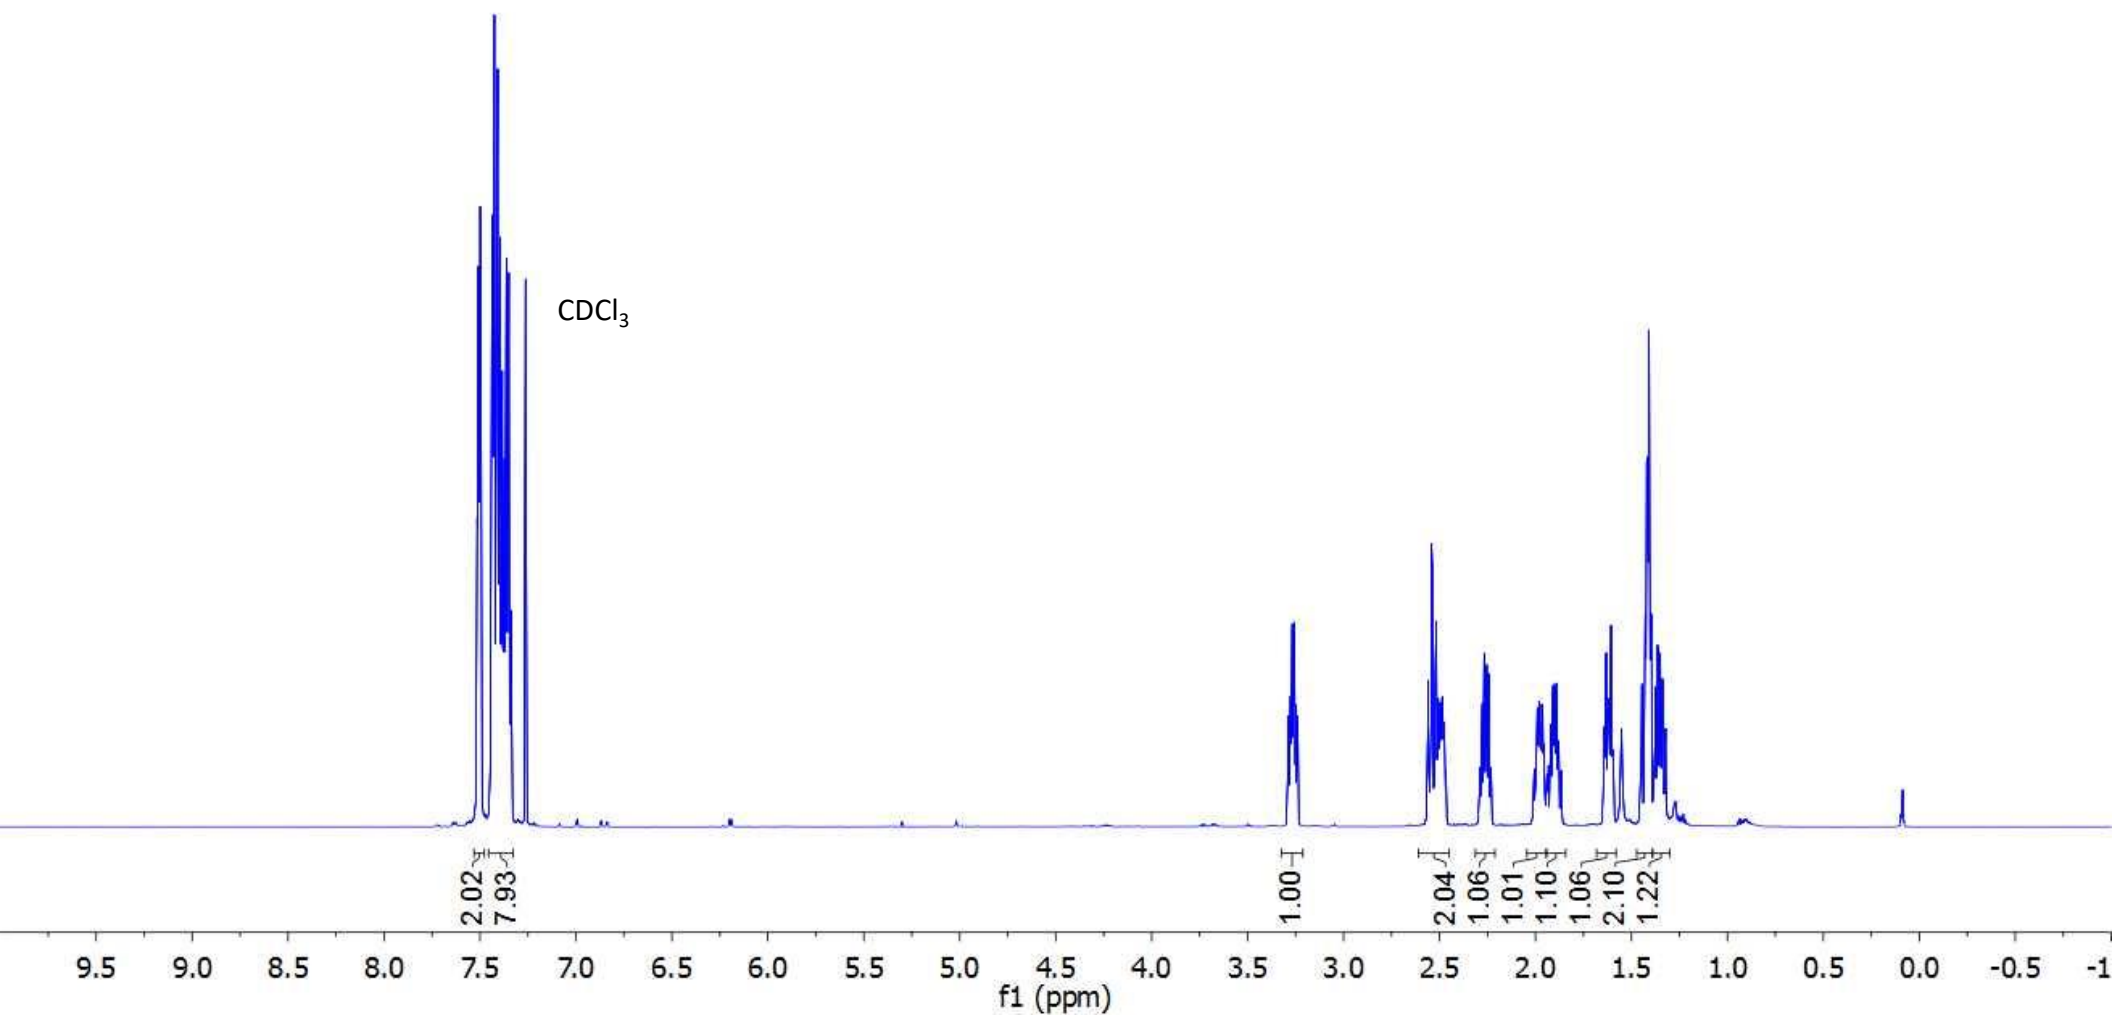

$^{13}\text{C}$  NMR (150 MHz,  $\text{CDCl}_3$ )

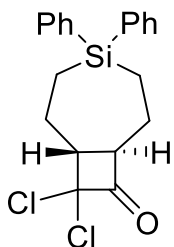

**13**

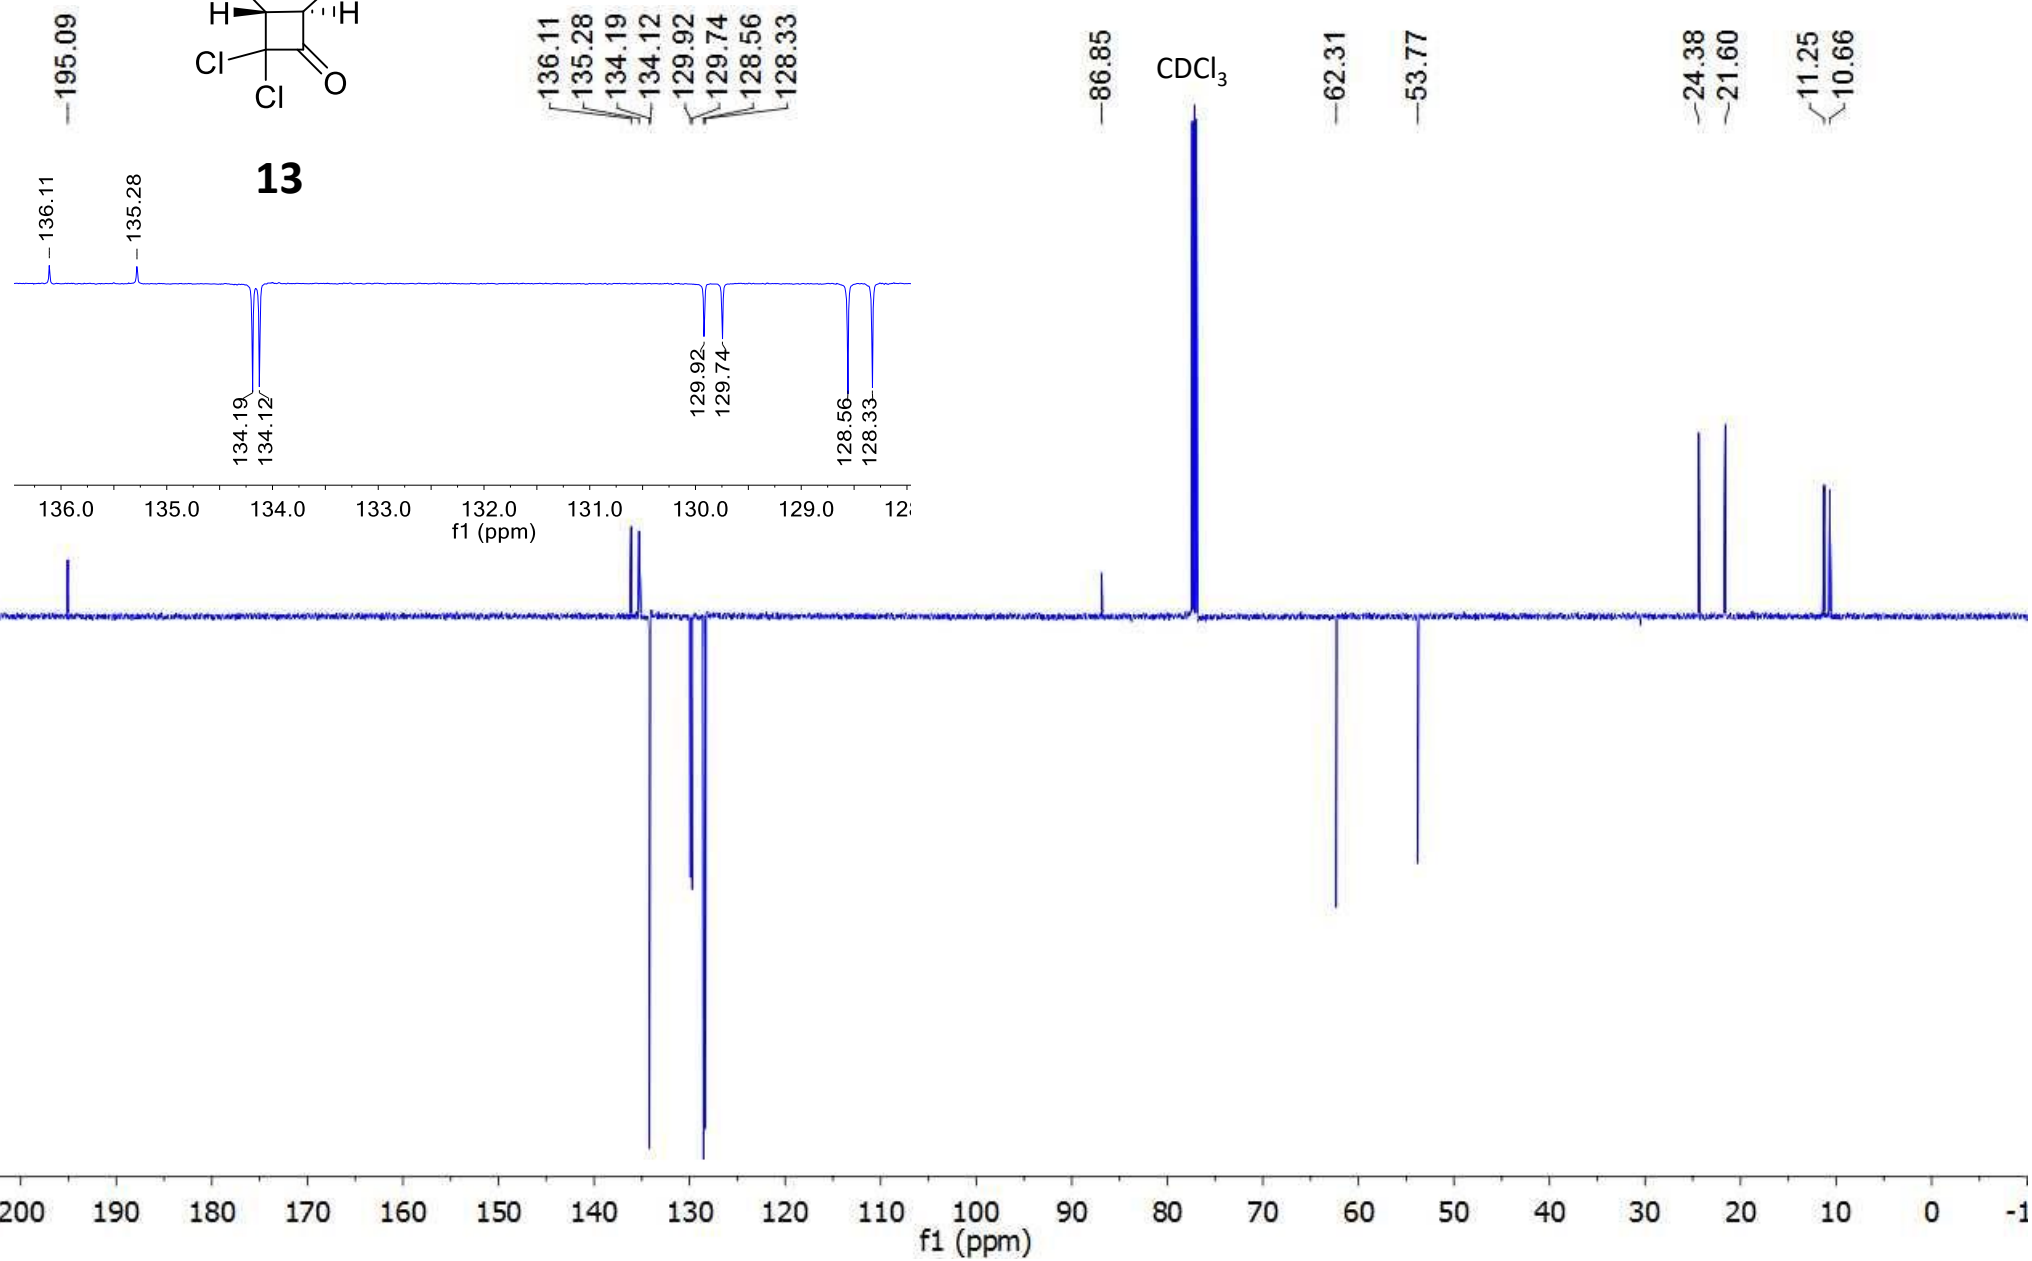

COSY (400 MHz, CDCl<sub>3</sub>)

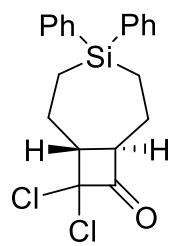

**13**

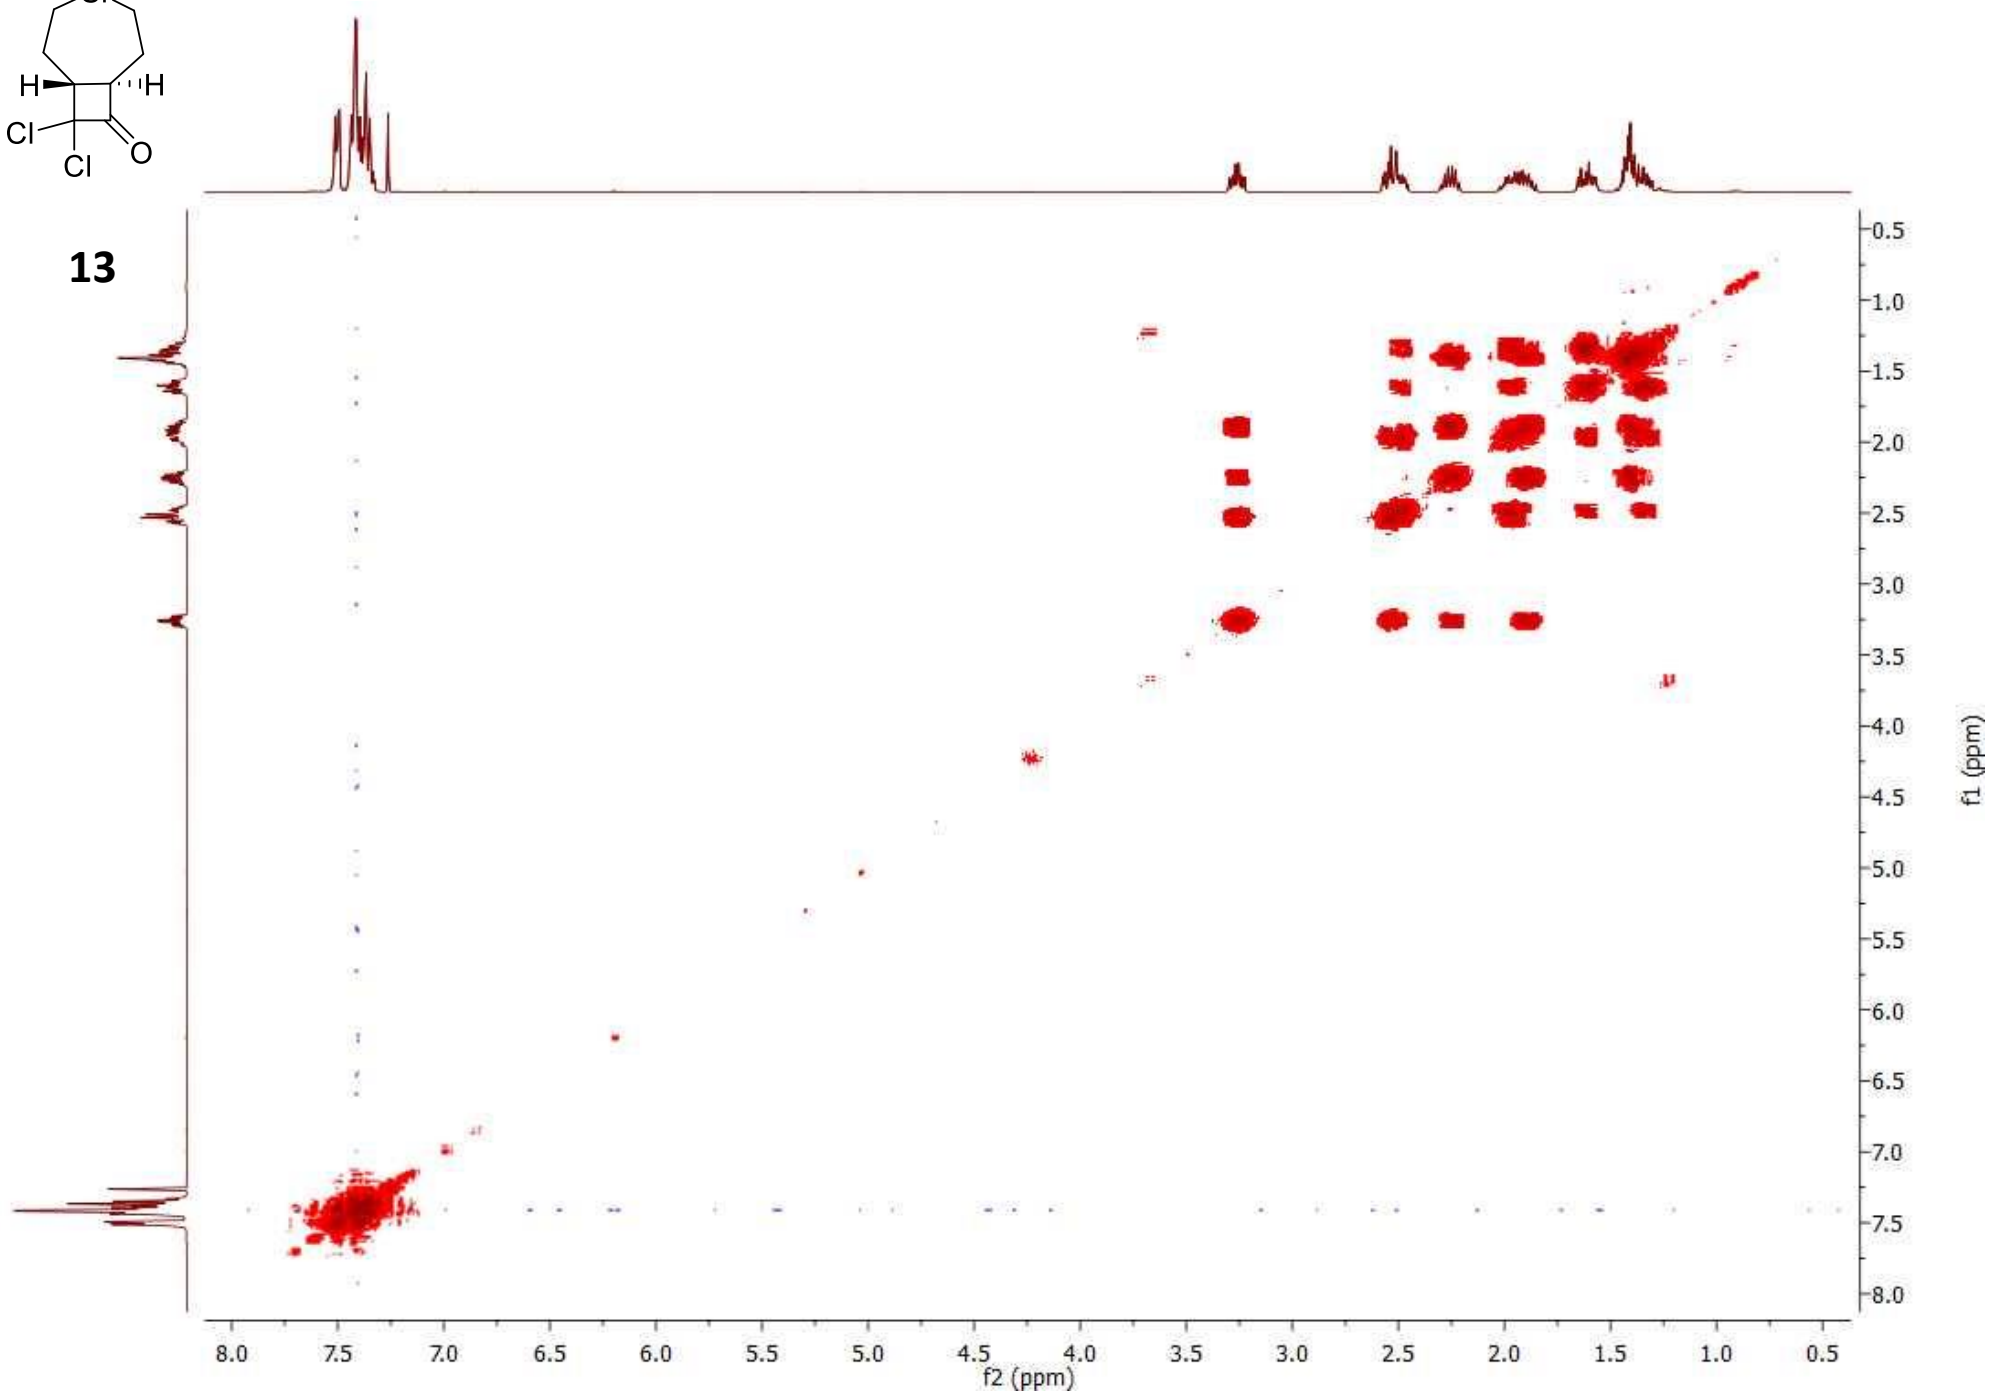

HMQC (400 MHz, CDCl<sub>3</sub>)

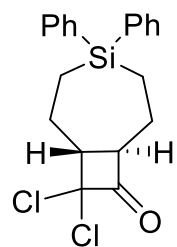

**13**

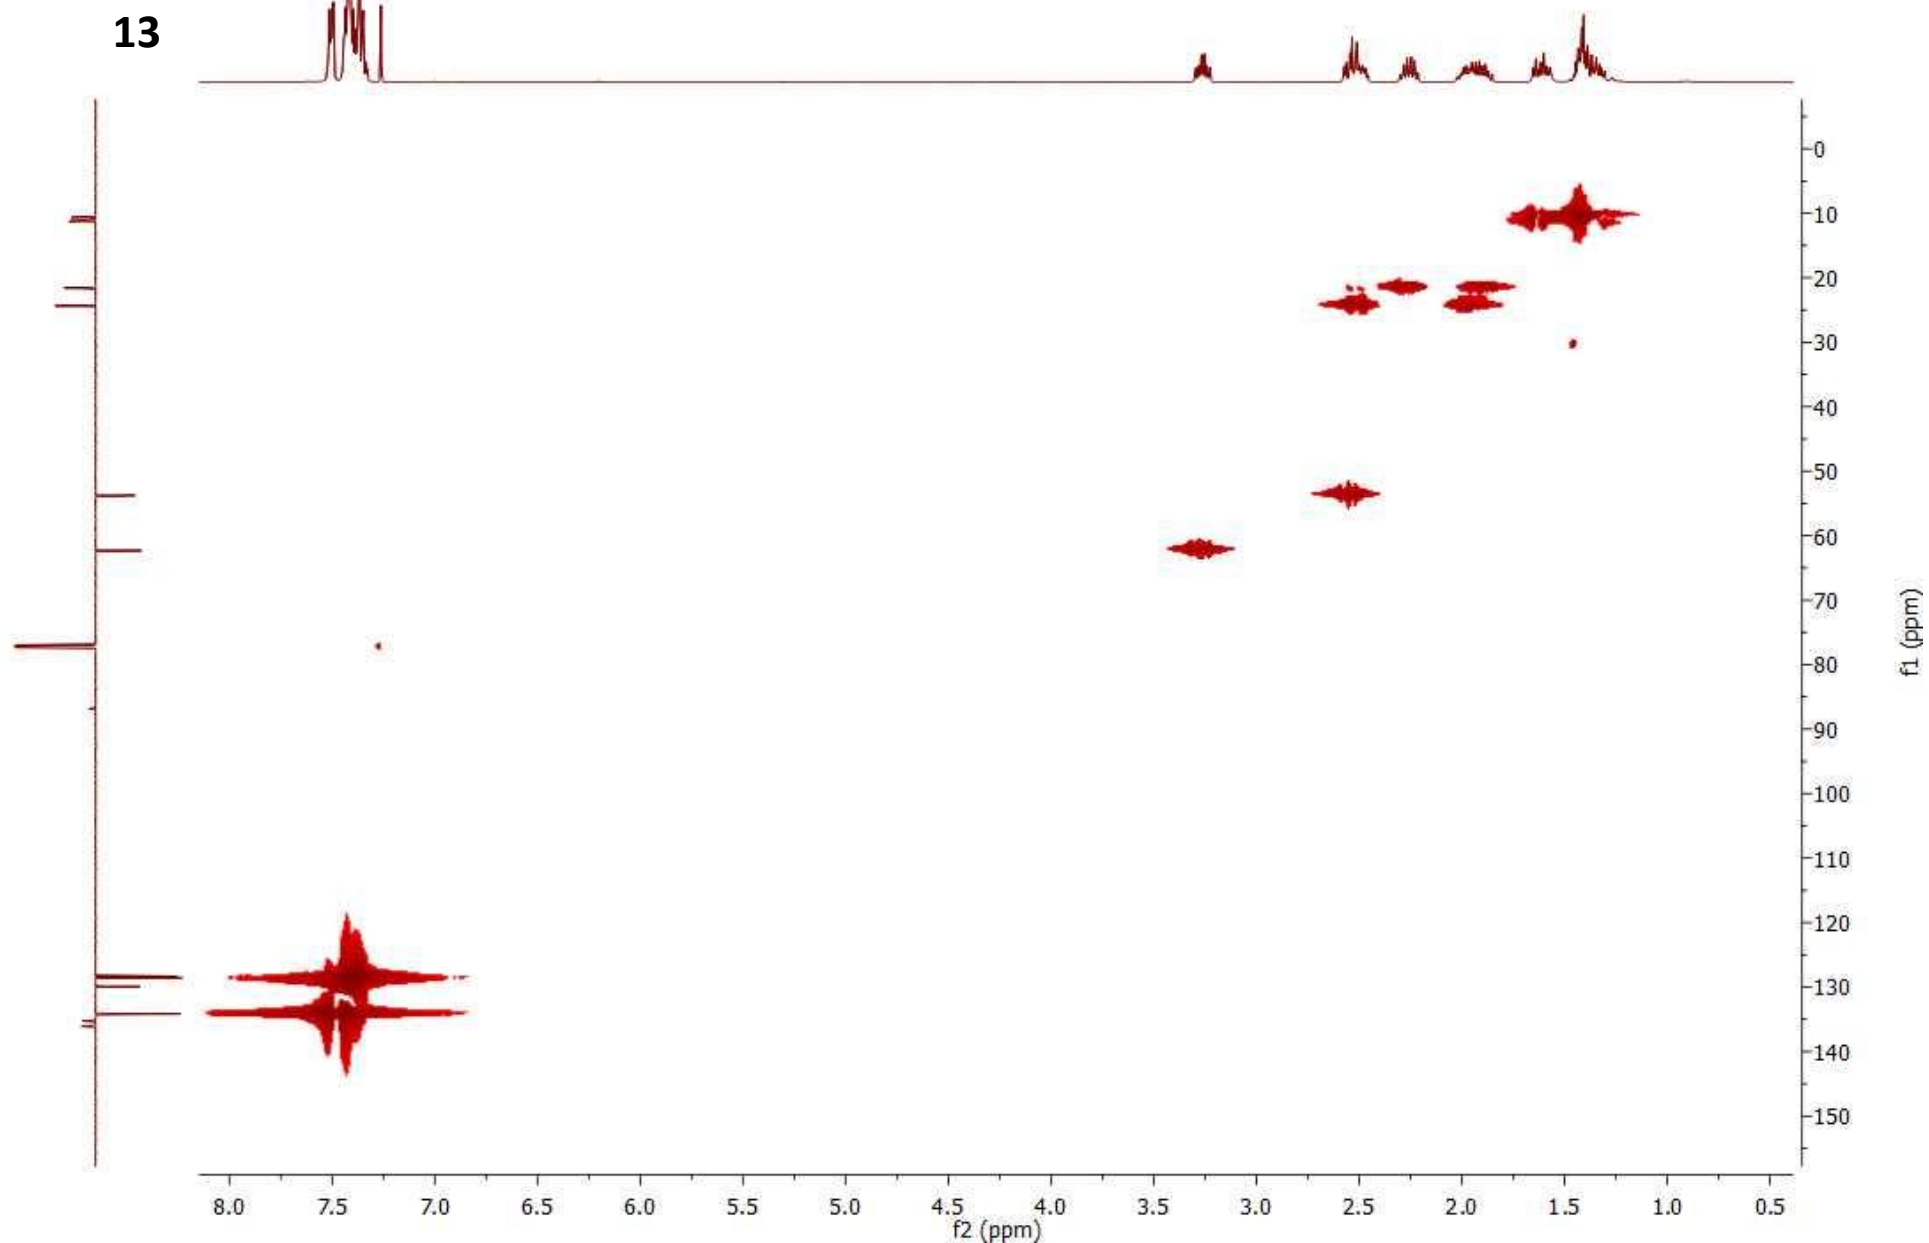



<sup>1</sup>H NMR (600 MHz, DMSO-d<sub>6</sub>)

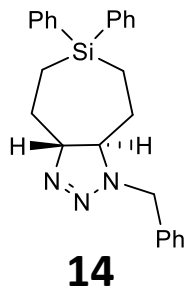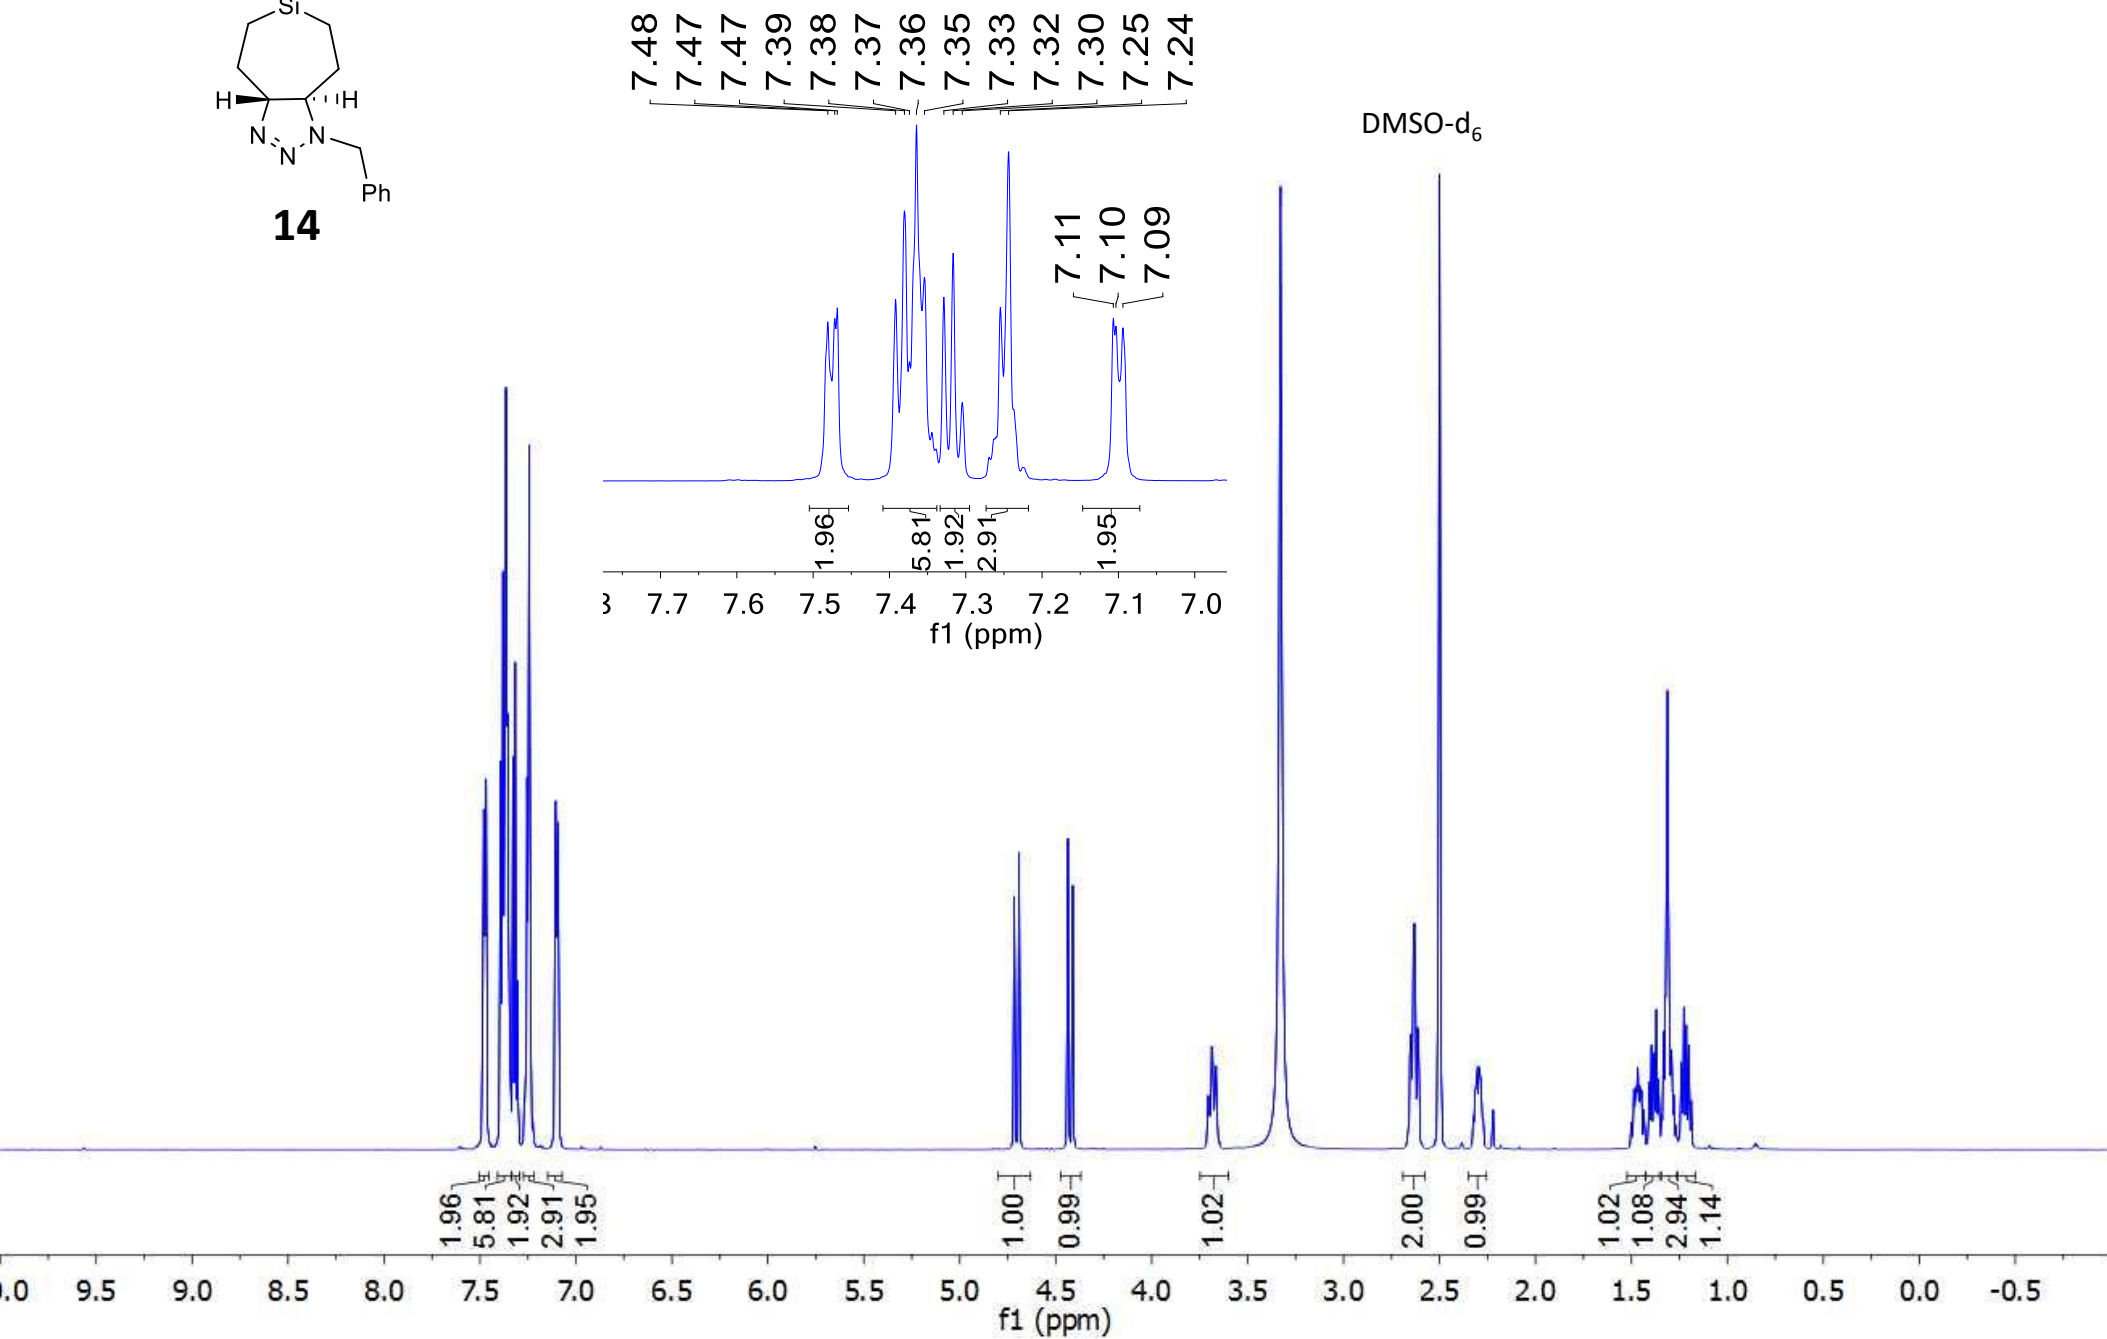

$^{13}\text{C}$  NMR (150 MHz,  $\text{DMSO-d}_6$ )

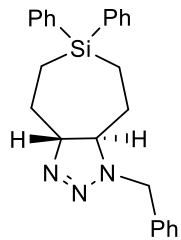

**14**

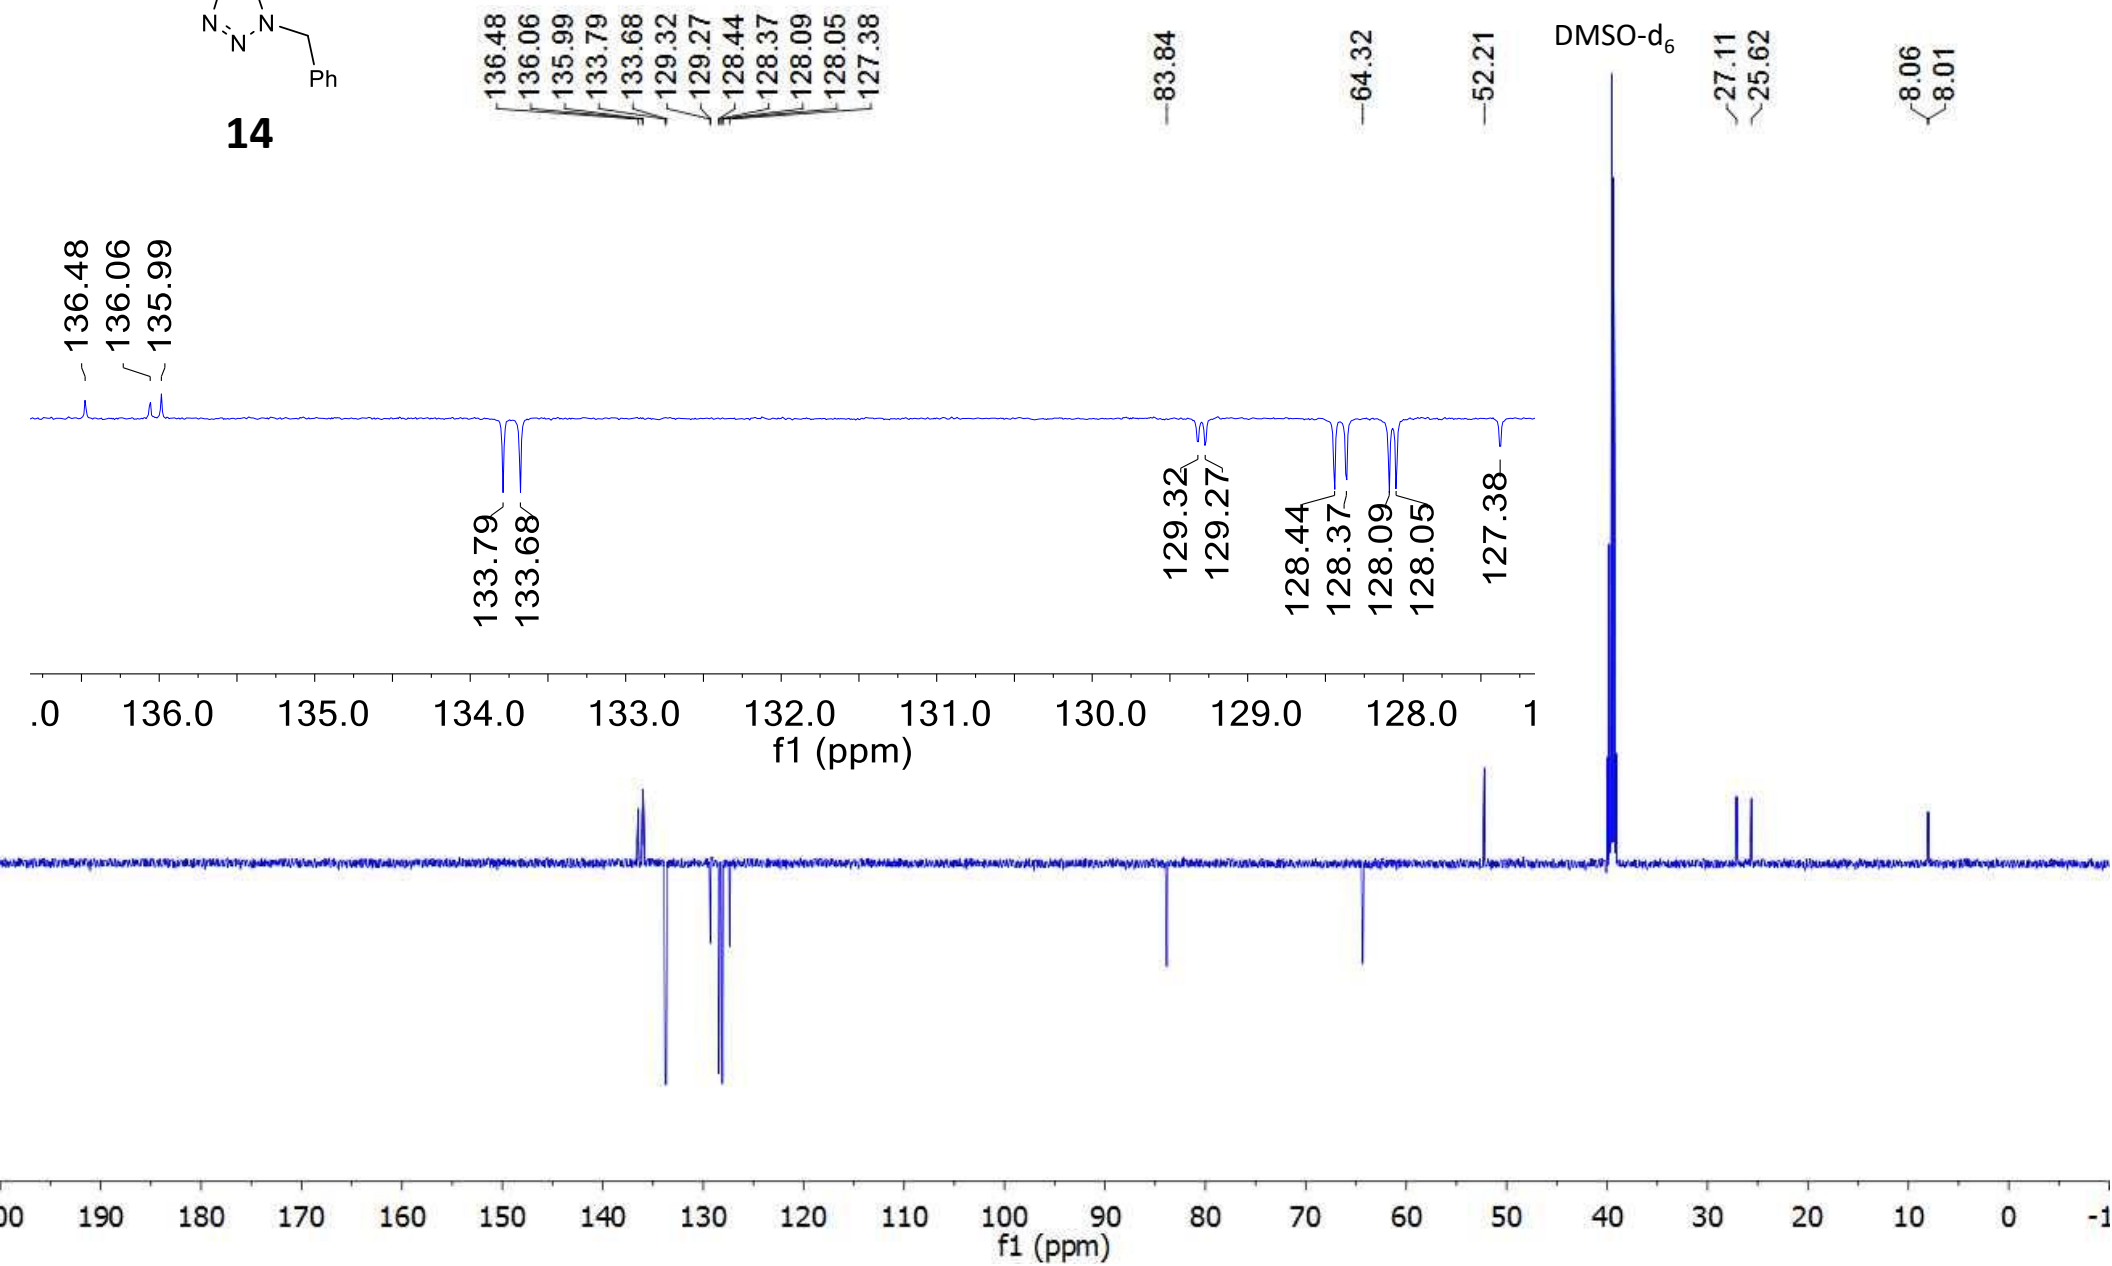

$^1\text{H}$  NMR (400 MHz,  $\text{CDCl}_3$ )

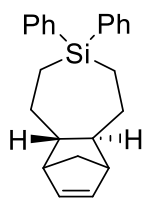

**11**

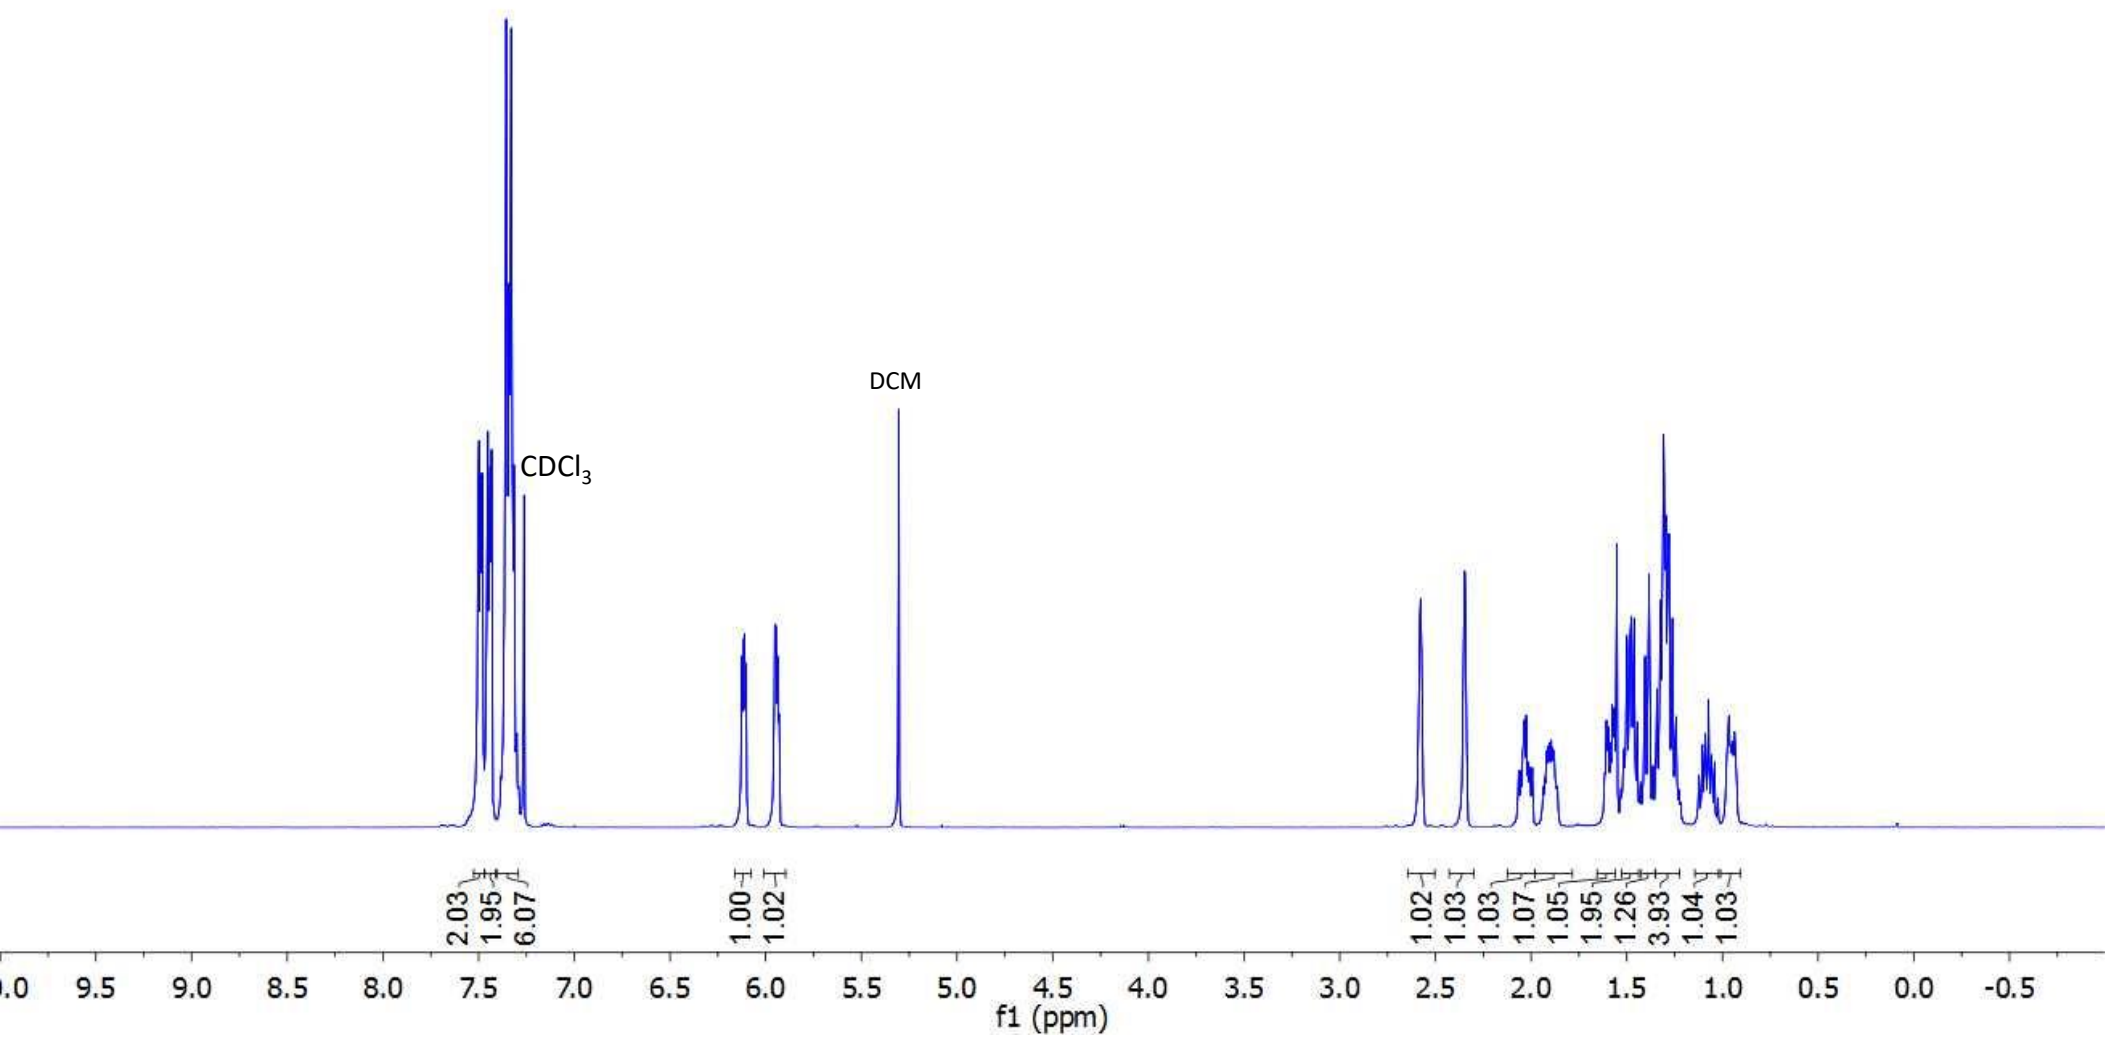

$^{13}\text{C}$  NMR (150 MHz,  $\text{C}_6\text{D}_6$ )

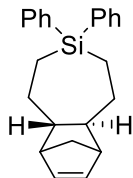

**11**

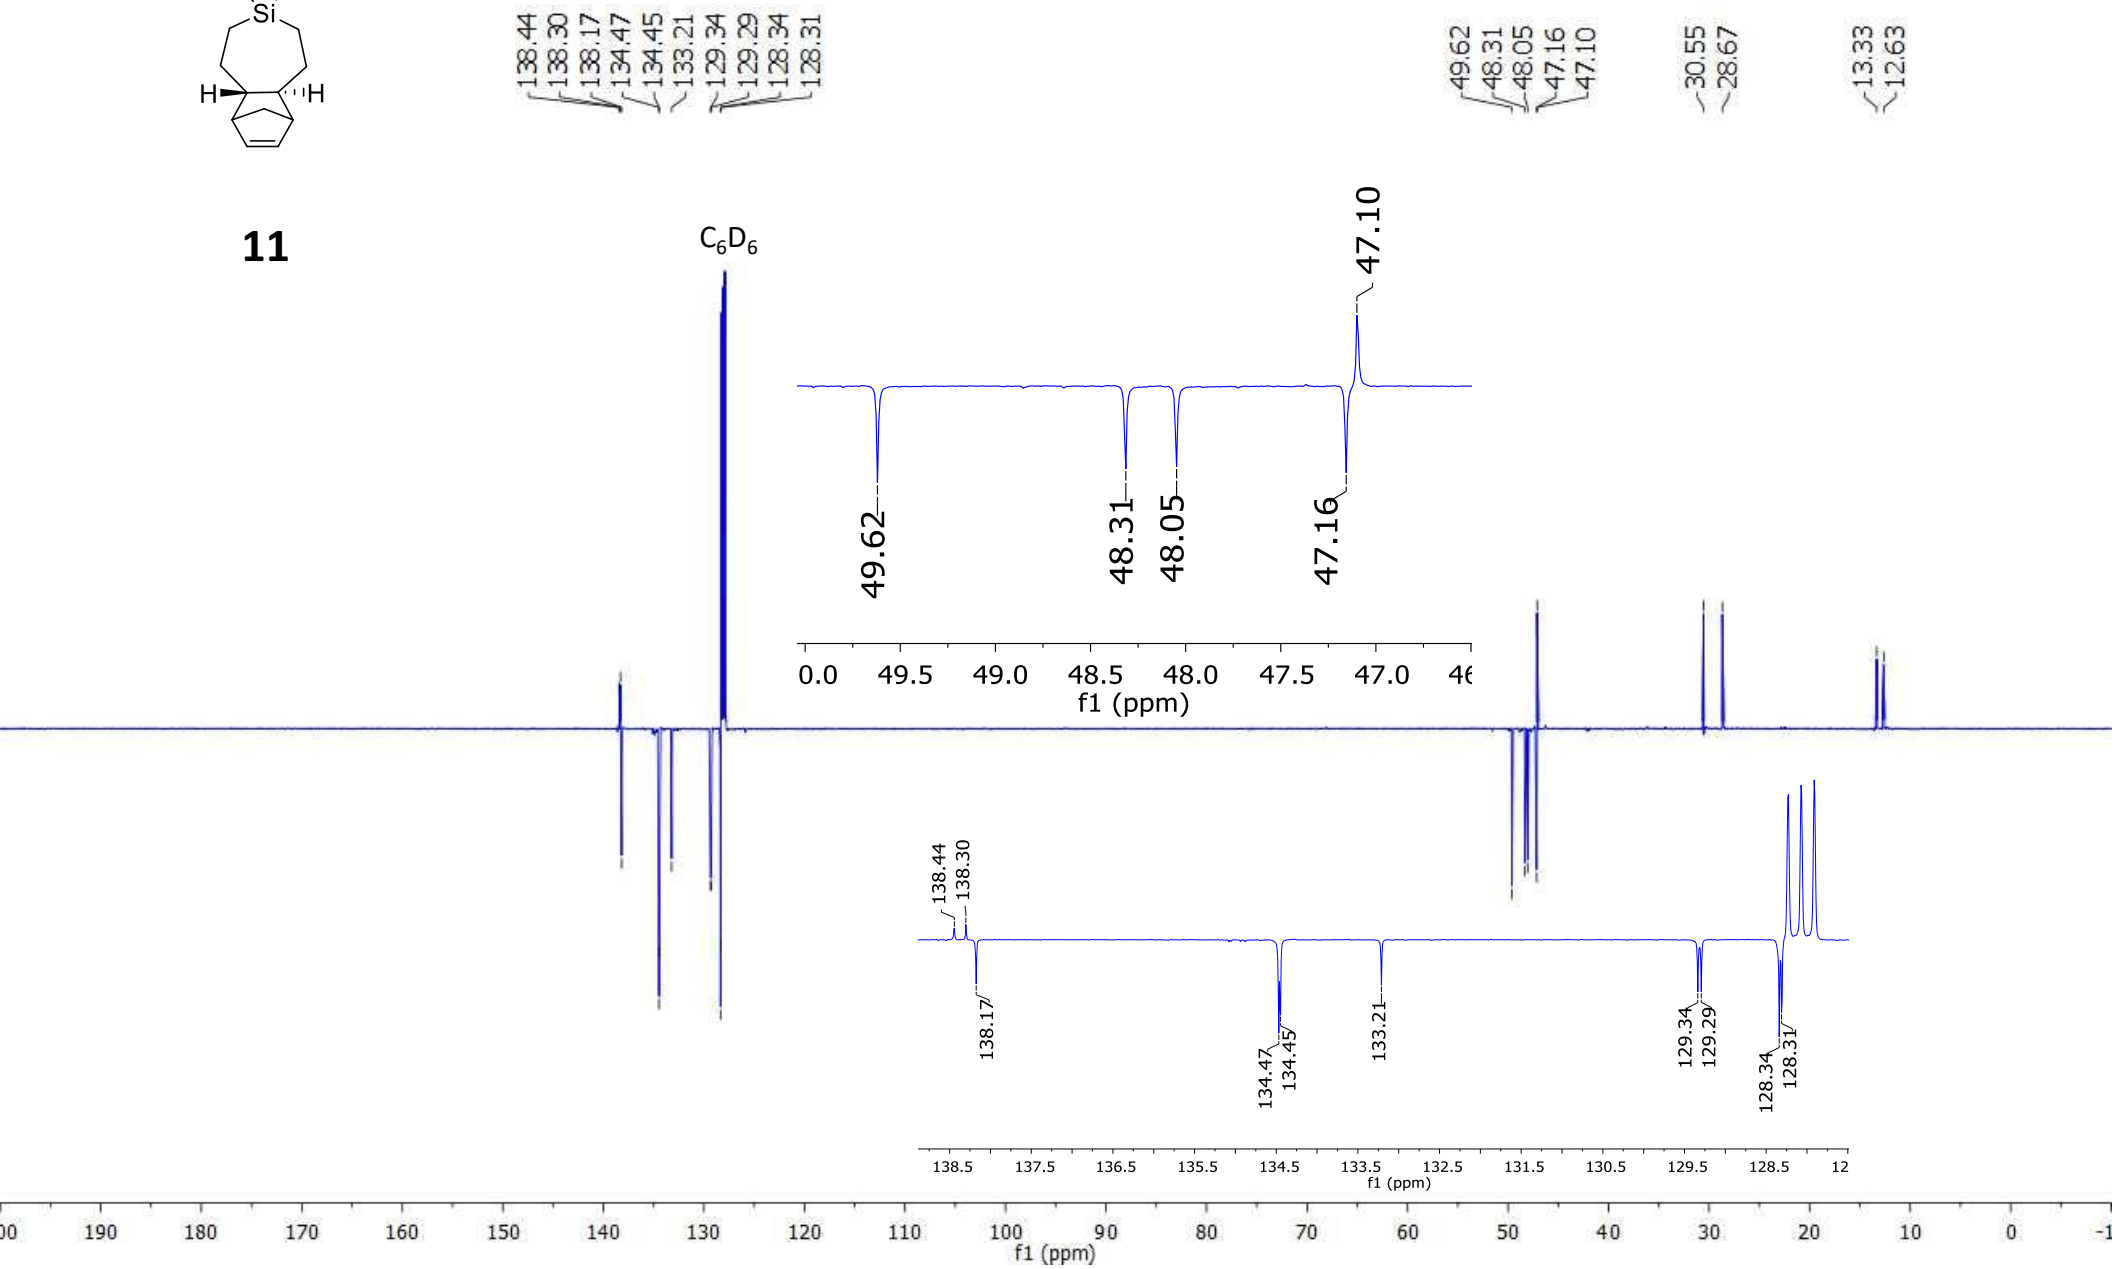

$^1\text{H}$  NMR (600 MHz,  $\text{CDCl}_3$ )

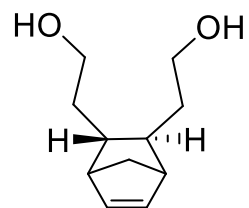

**15**

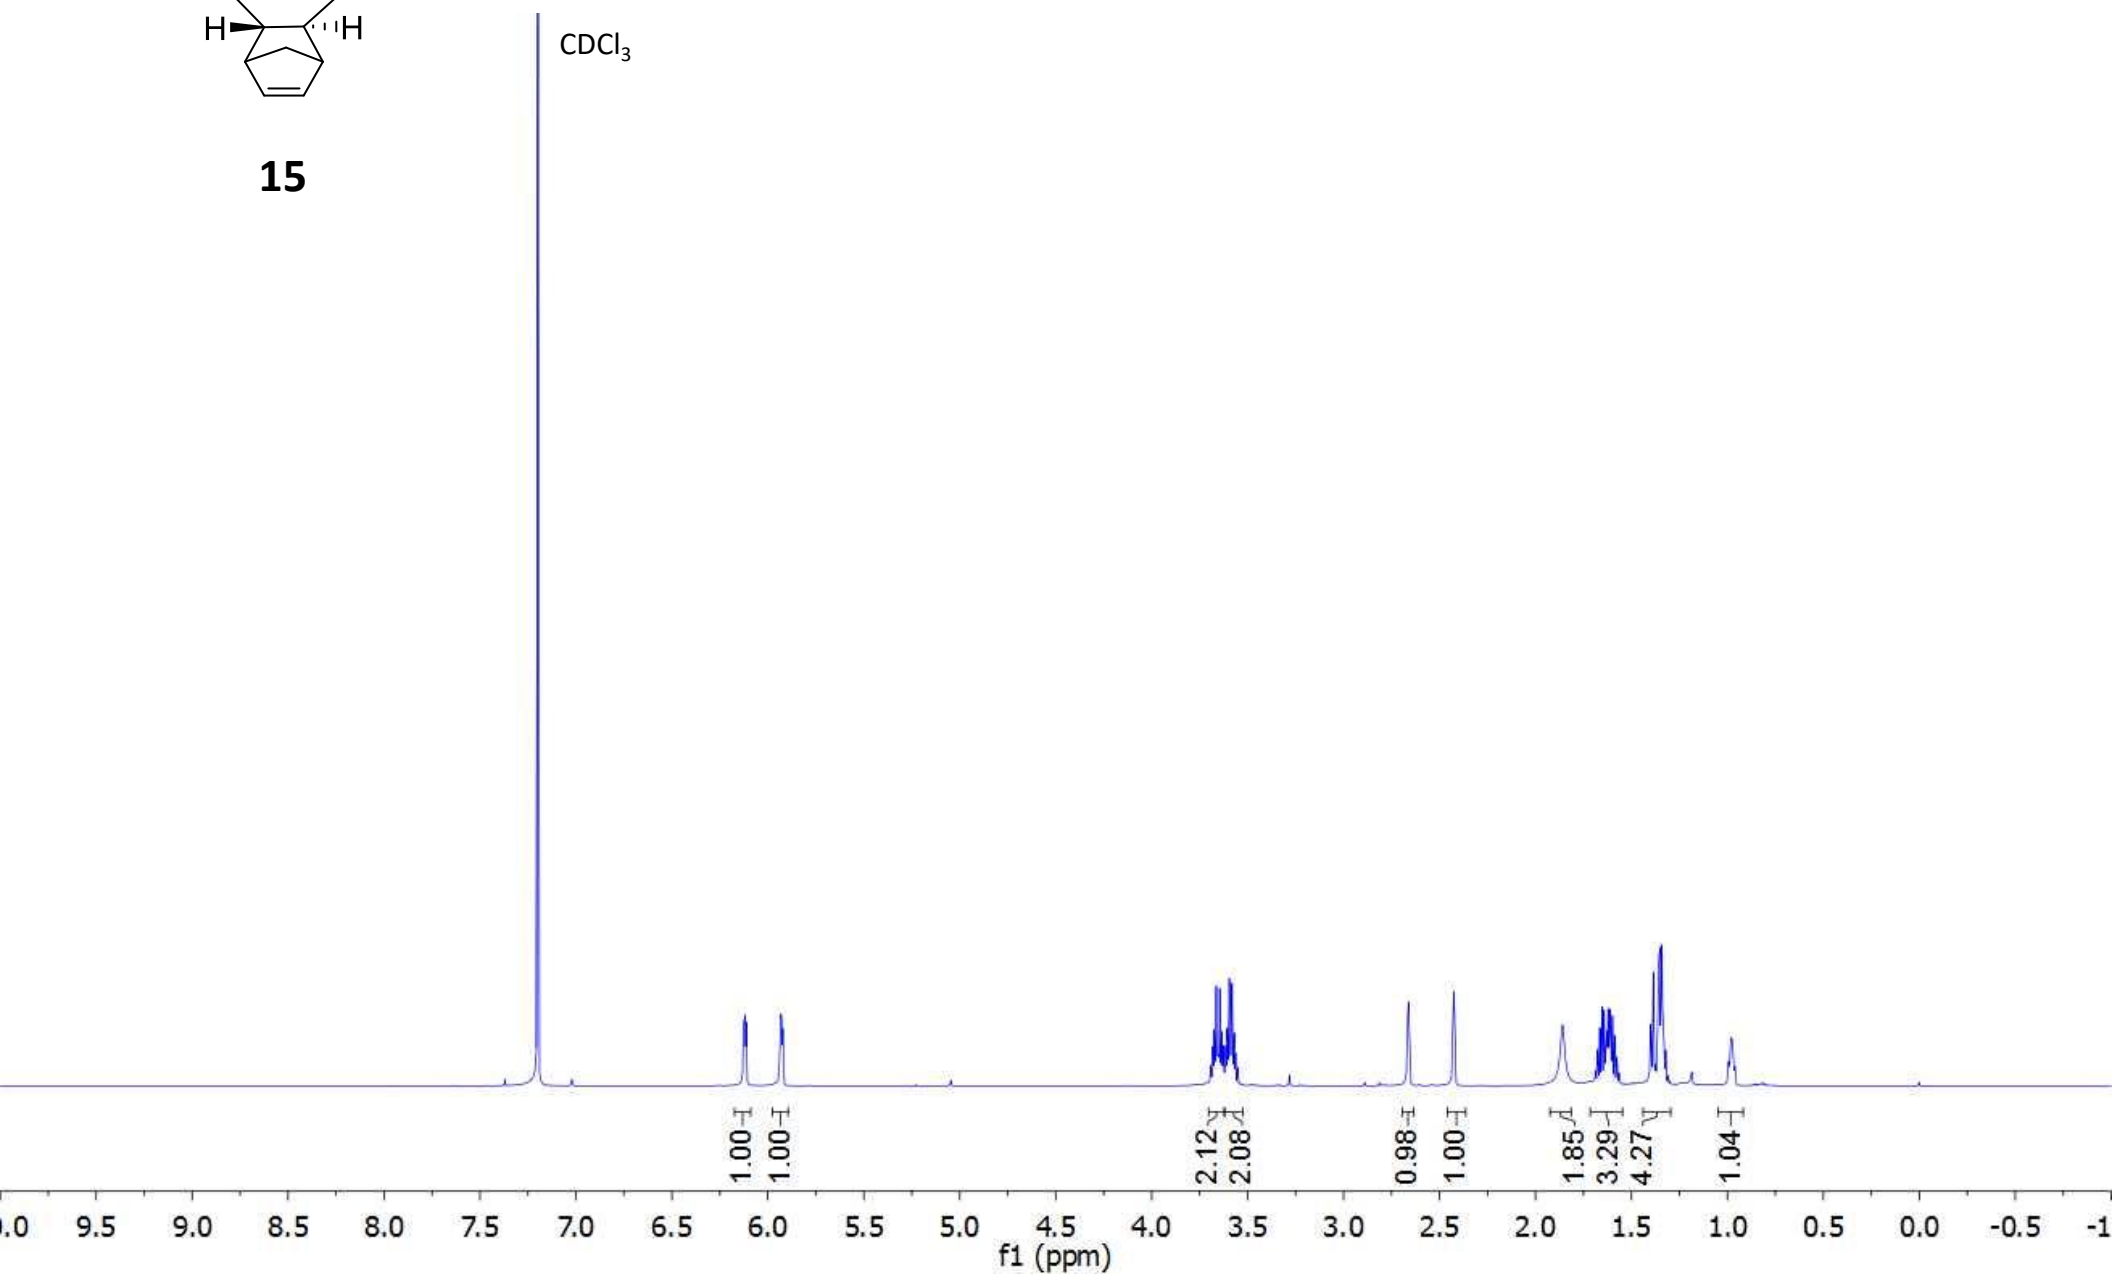

$^{13}\text{C}$  NMR (100 MHz,  $\text{CDCl}_3$ )

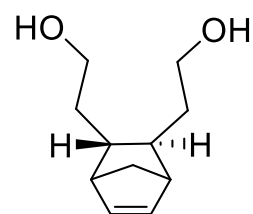

**15**

-137.79  
-133.79

62.31  
62.28  
47.35  
46.54  
45.87  
43.50  
42.37  
39.28  
37.77

$\text{CDCl}_3$

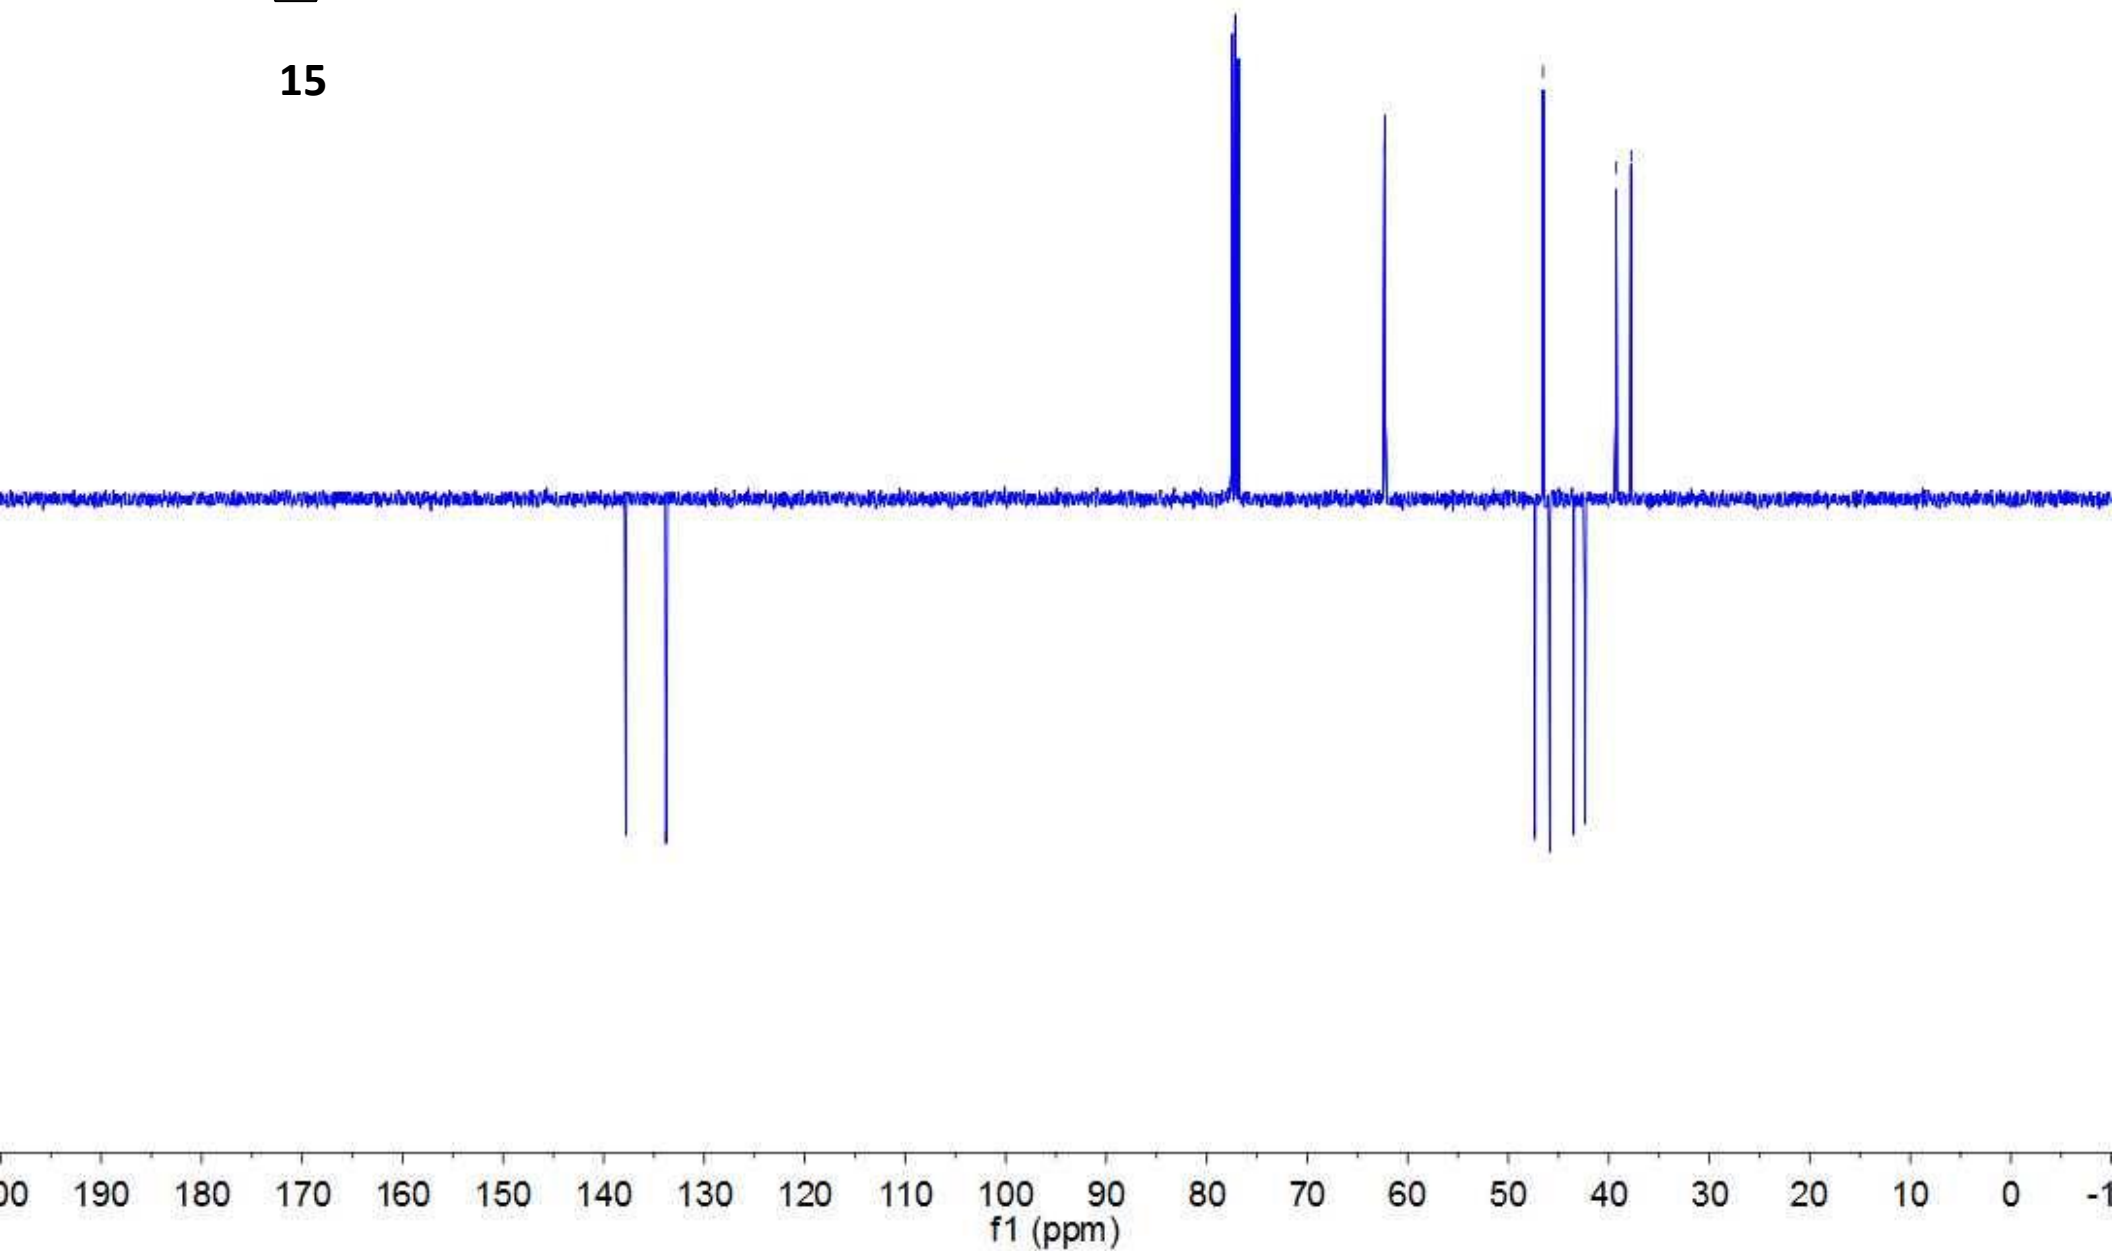

$^1\text{H}$  NMR (600 MHz,  $\text{CD}_3\text{OD}$ )

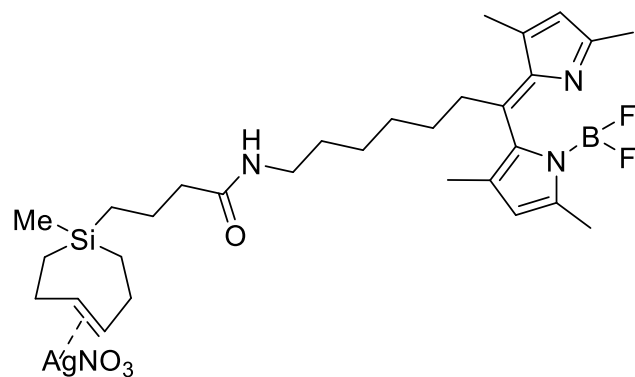

**AgSiTCH-BODIPY**

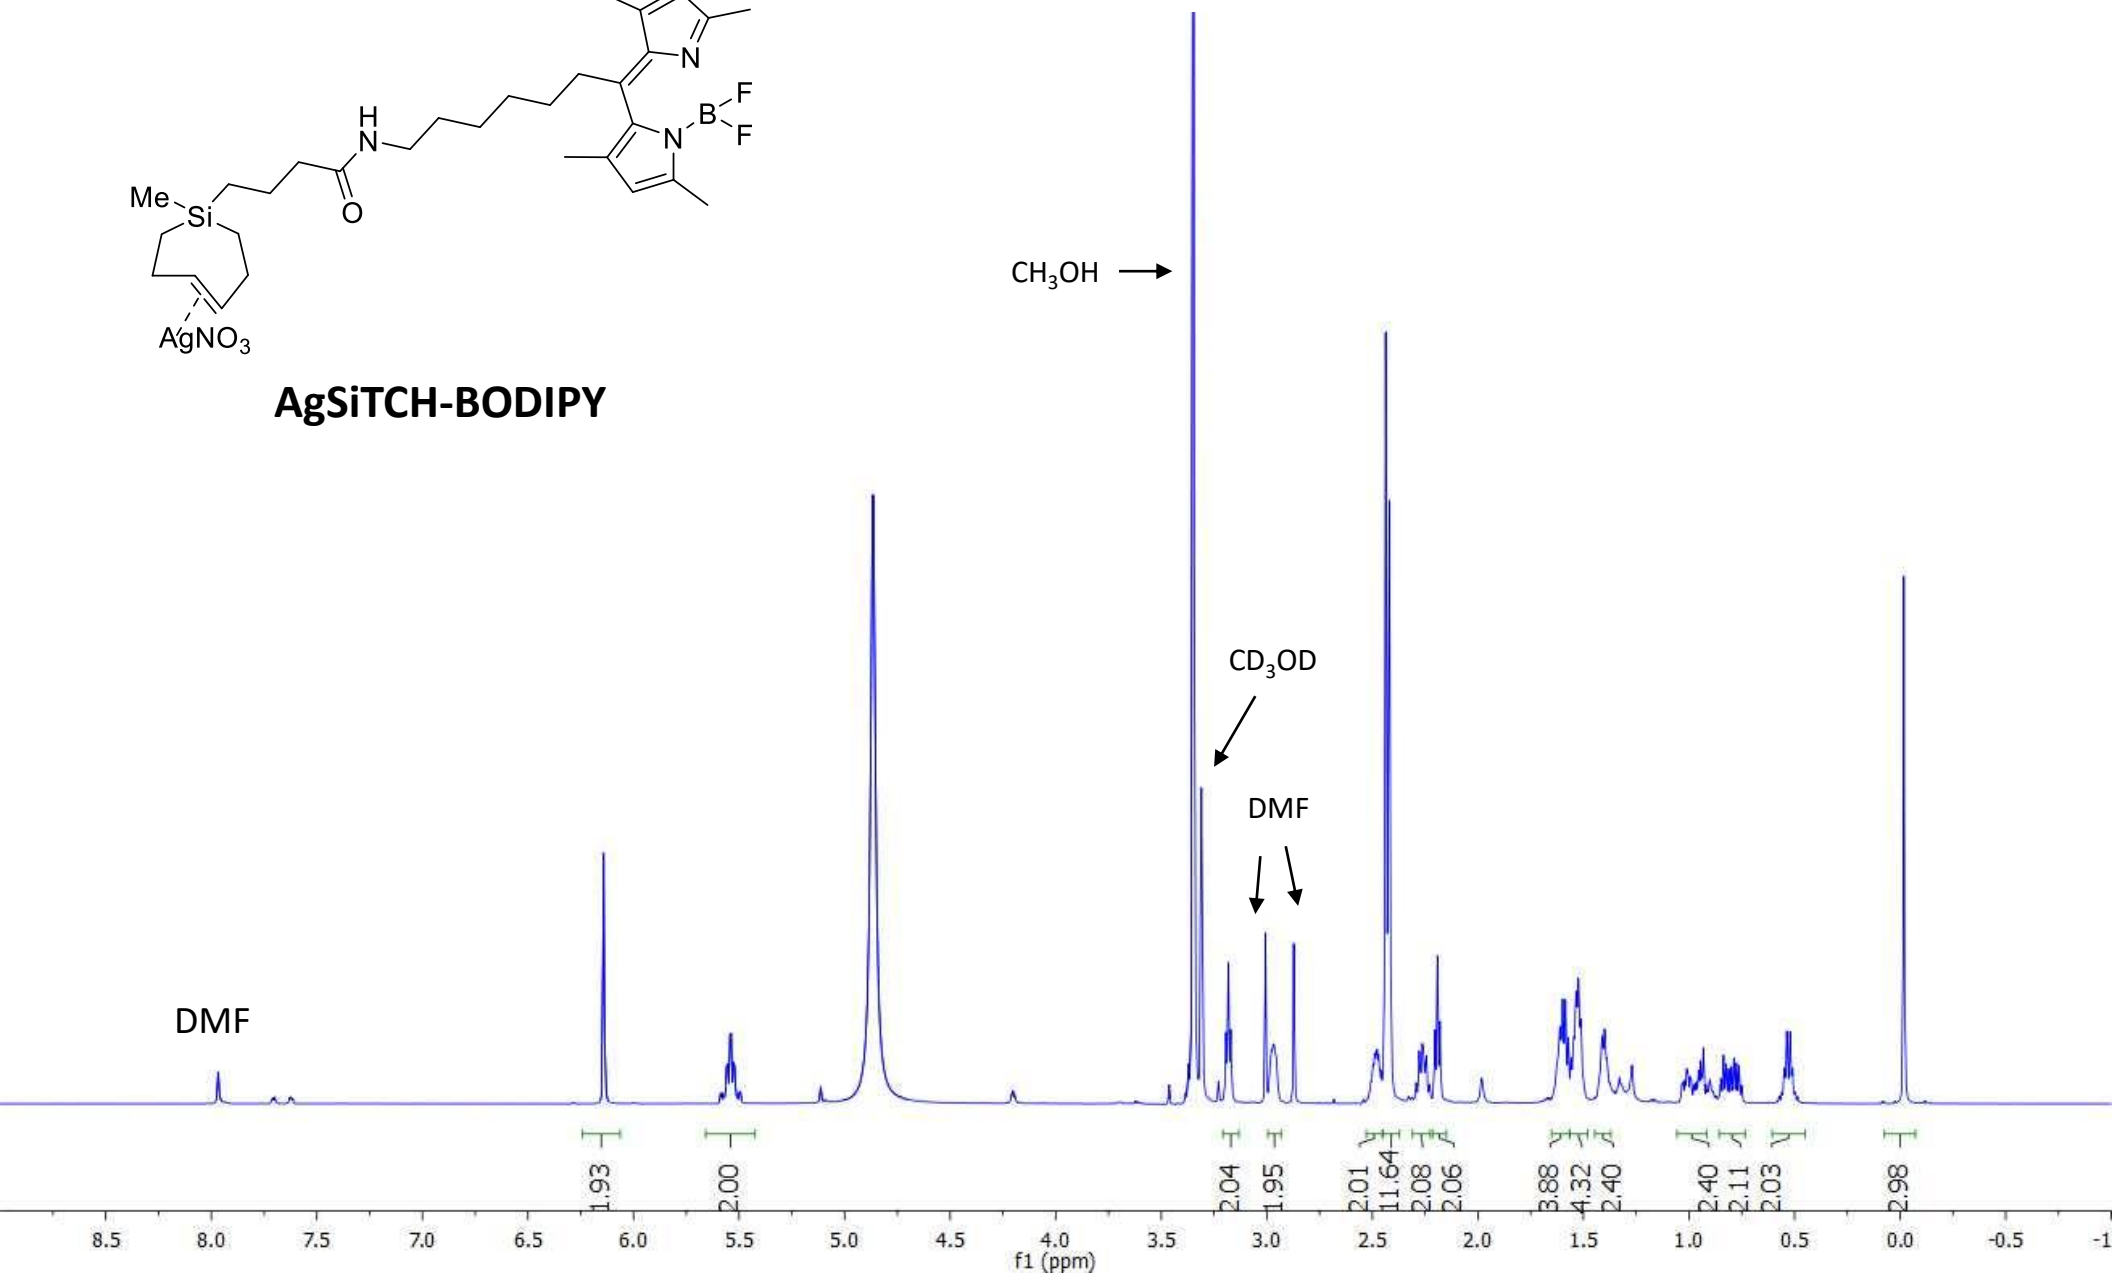

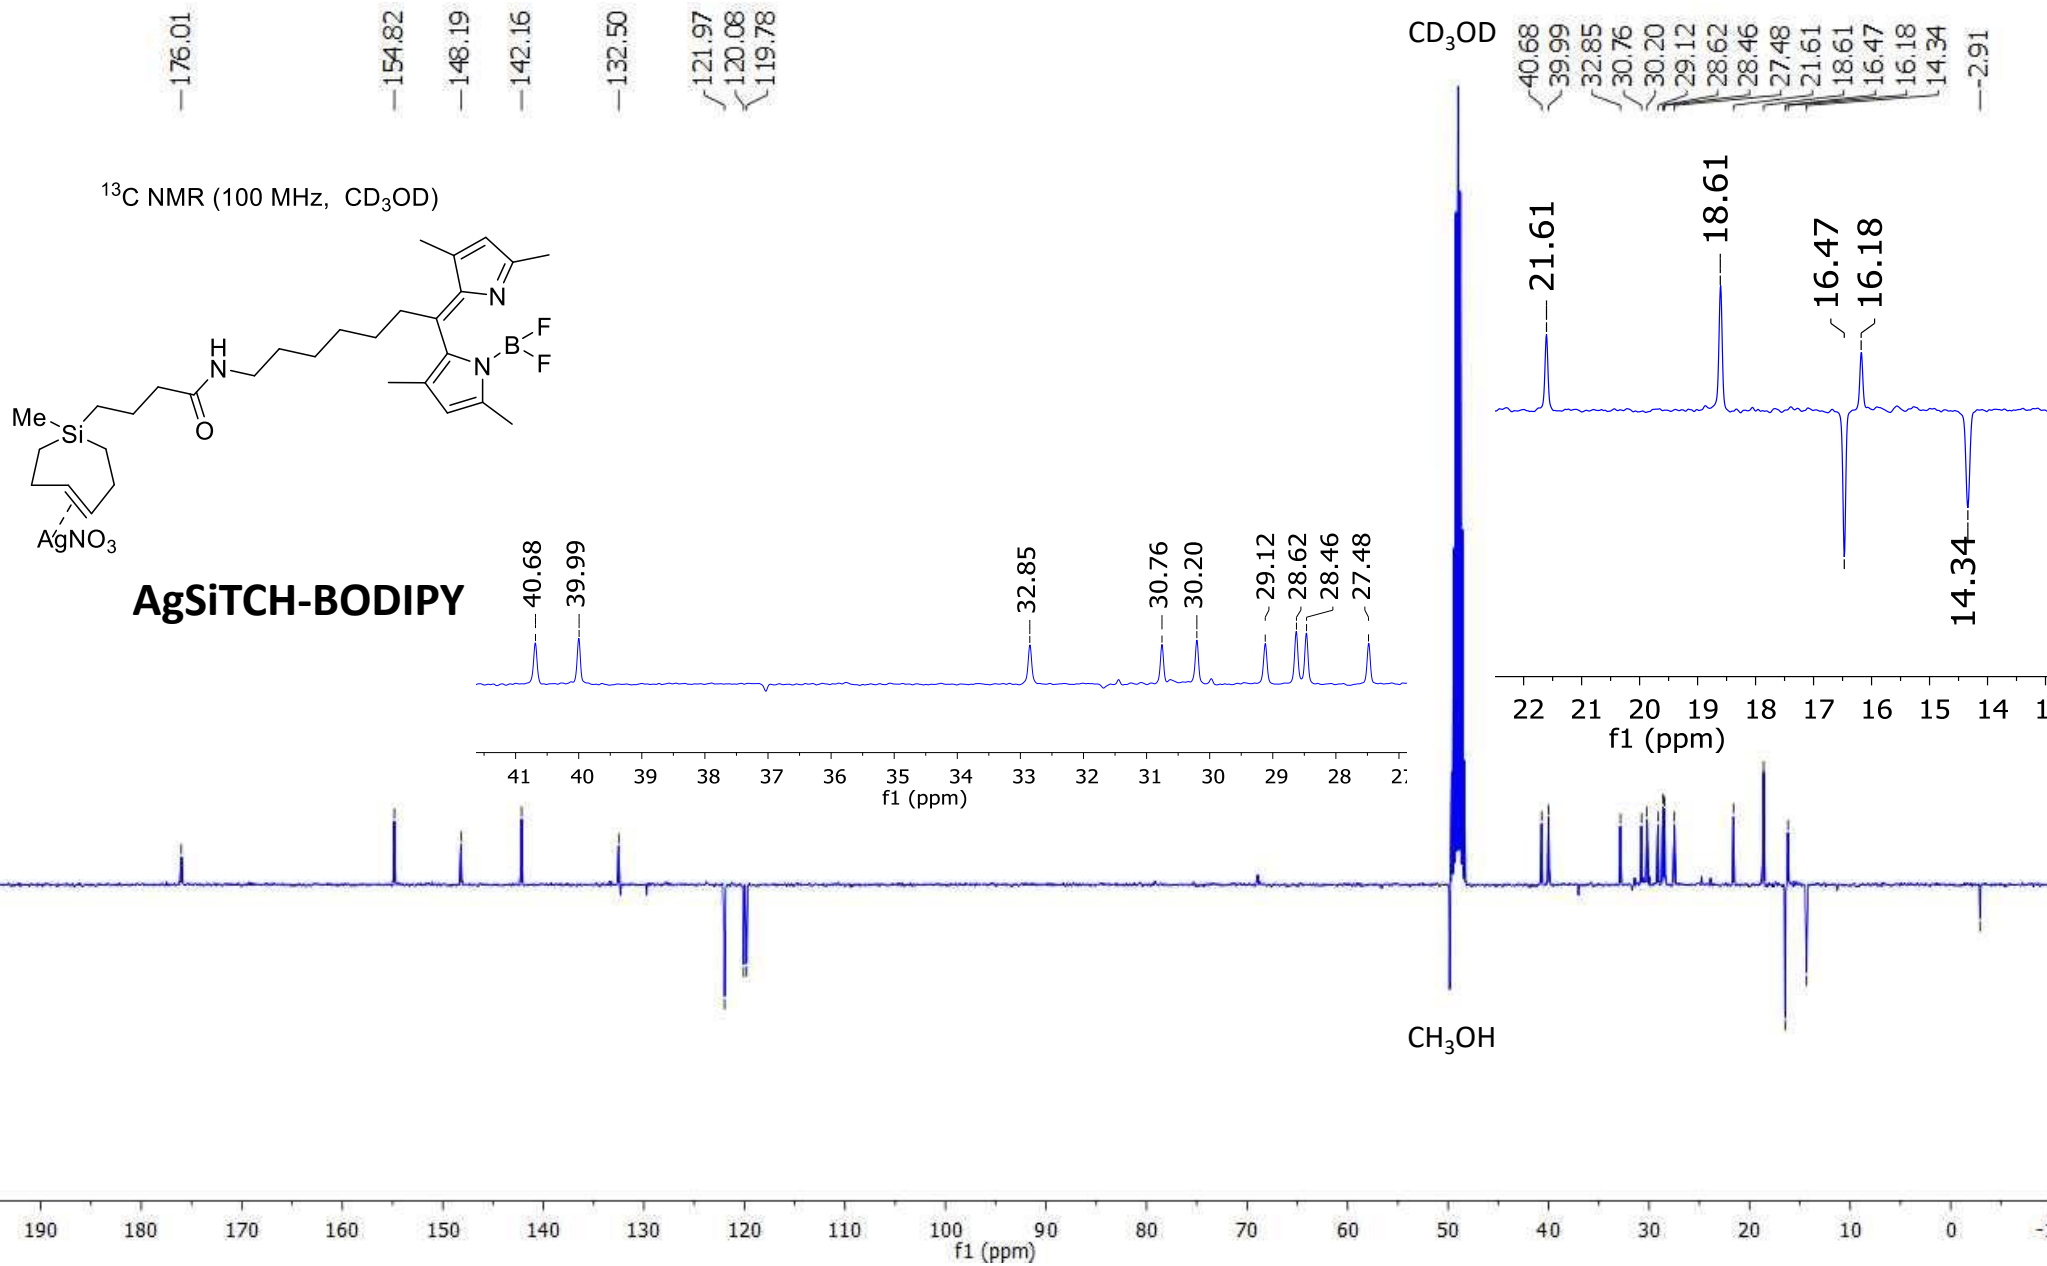



$^1\text{H}$  NMR (400 MHz,  $\text{CD}_3\text{OD}$ )

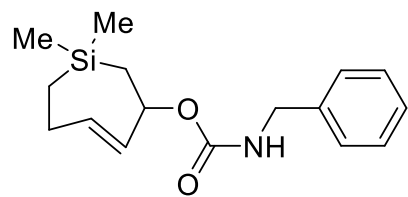

**18**

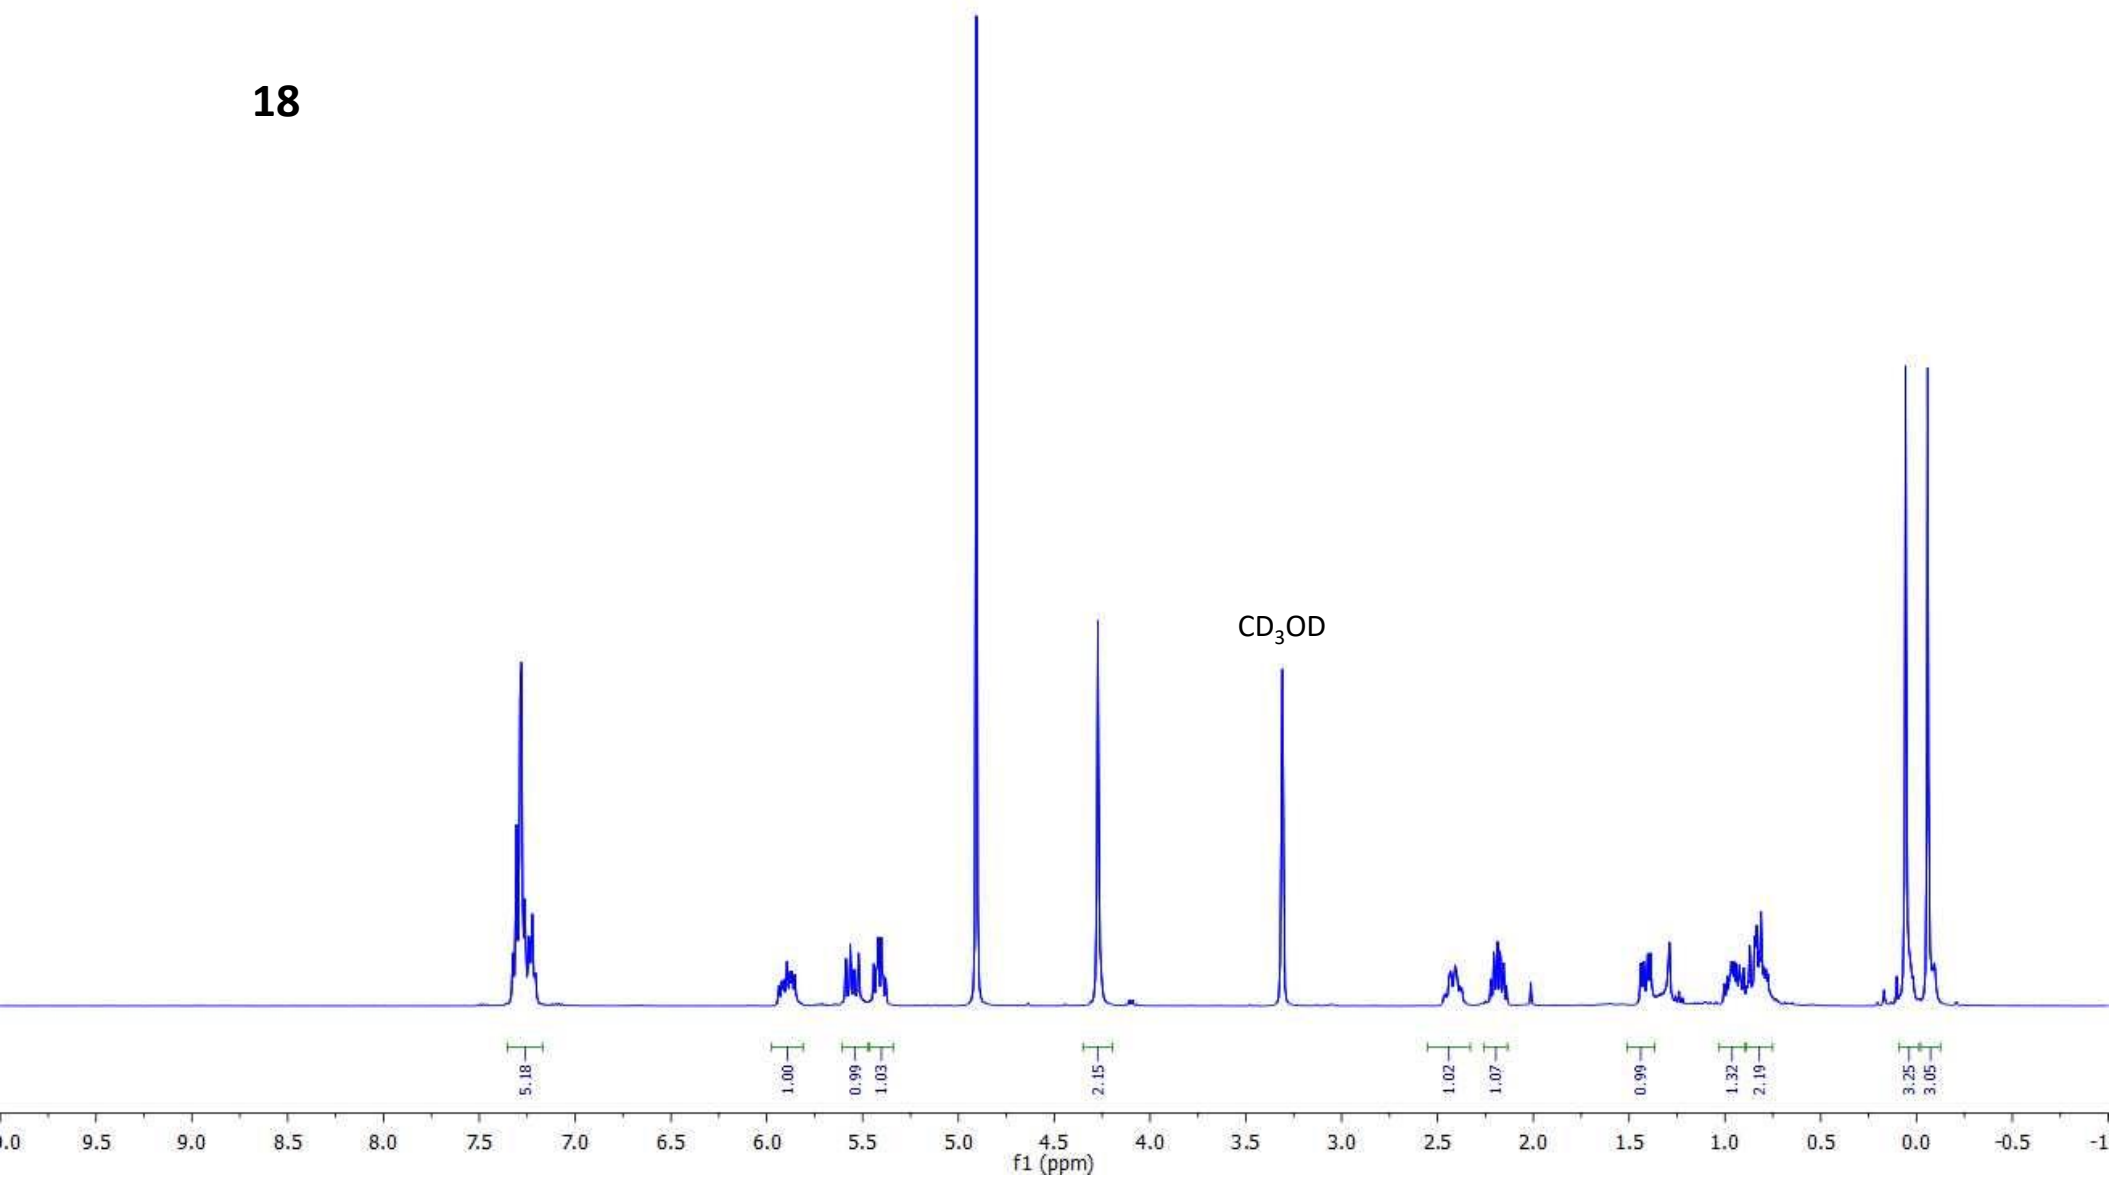

$^{13}\text{C}$  NMR (100 MHz,  $\text{CD}_3\text{OD}$ )

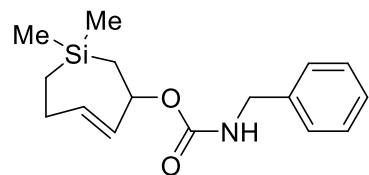

**18**

— 158.99

— 140.72

— 136.98

— 131.39

— 129.46

— 128.21

— 128.07

— 76.76

$\text{CD}_3\text{OD}$

— 45.29

— 28.28

— 25.82

— 21.50

— 0.72

— 1.22

f1 (ppm)
